# Supplementary material for: Community Structure and Diversity of Endophytic Fungi in Cultivated Polygala crotalarioides at Two Different Growth Stages Based on Culture-Independent and Culture-Based Methods
Source: MDPI journal article supplement (doi:10.3390/jof10030195), 2024-03-04
Supplement: s1 [file s1]

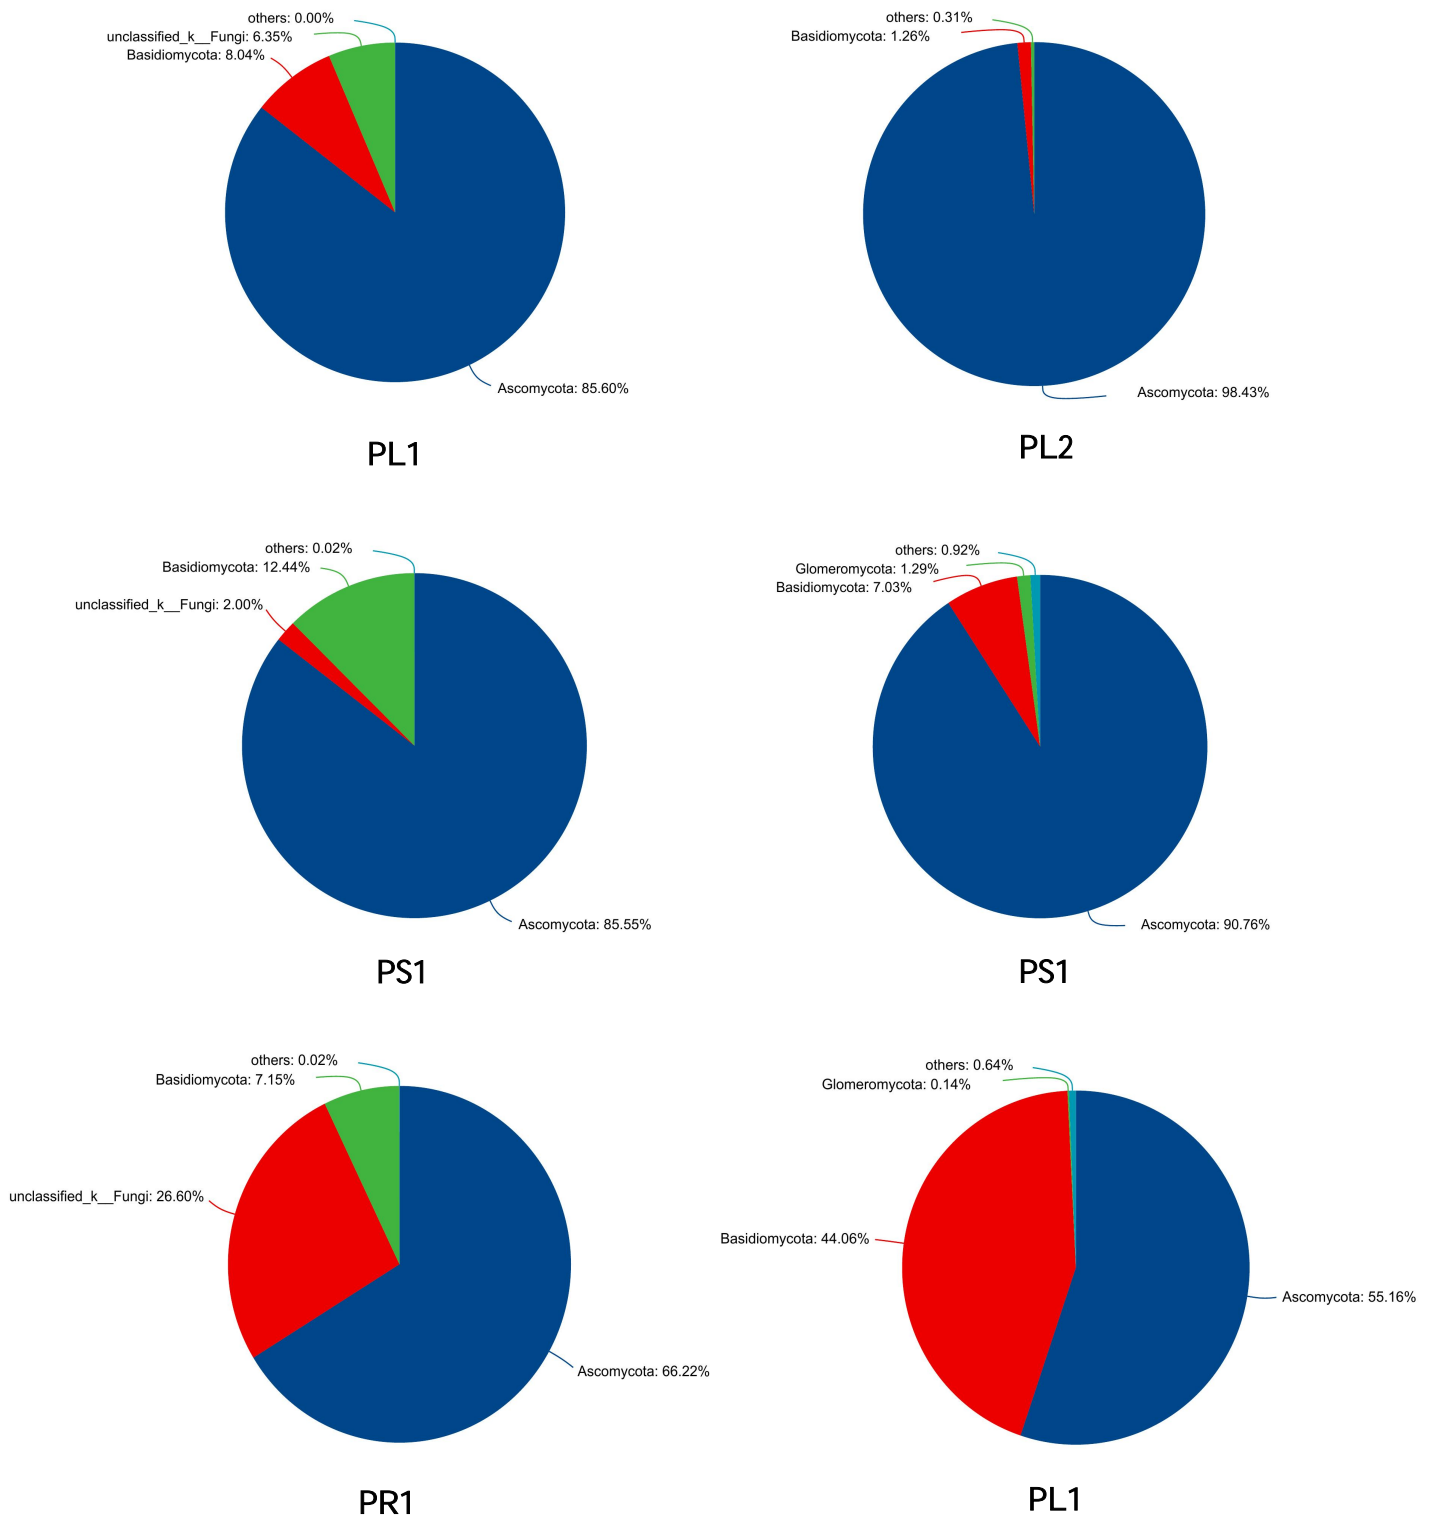

**Figure S1.** Community analysis pieplot of endophytic fungi from *P. crotalarioides* at Phylum level.
