# Supplementary material for: Community Structure and Diversity of Endophytic Fungi in Cultivated Polygala crotalarioides at Two Different Growth Stages Based on Culture-Independent and Culture-Based Methods
Source: MDPI journal article supplement (doi:10.3390/jof10030195), 2024-03-04
Supplement: s1 [file s1]

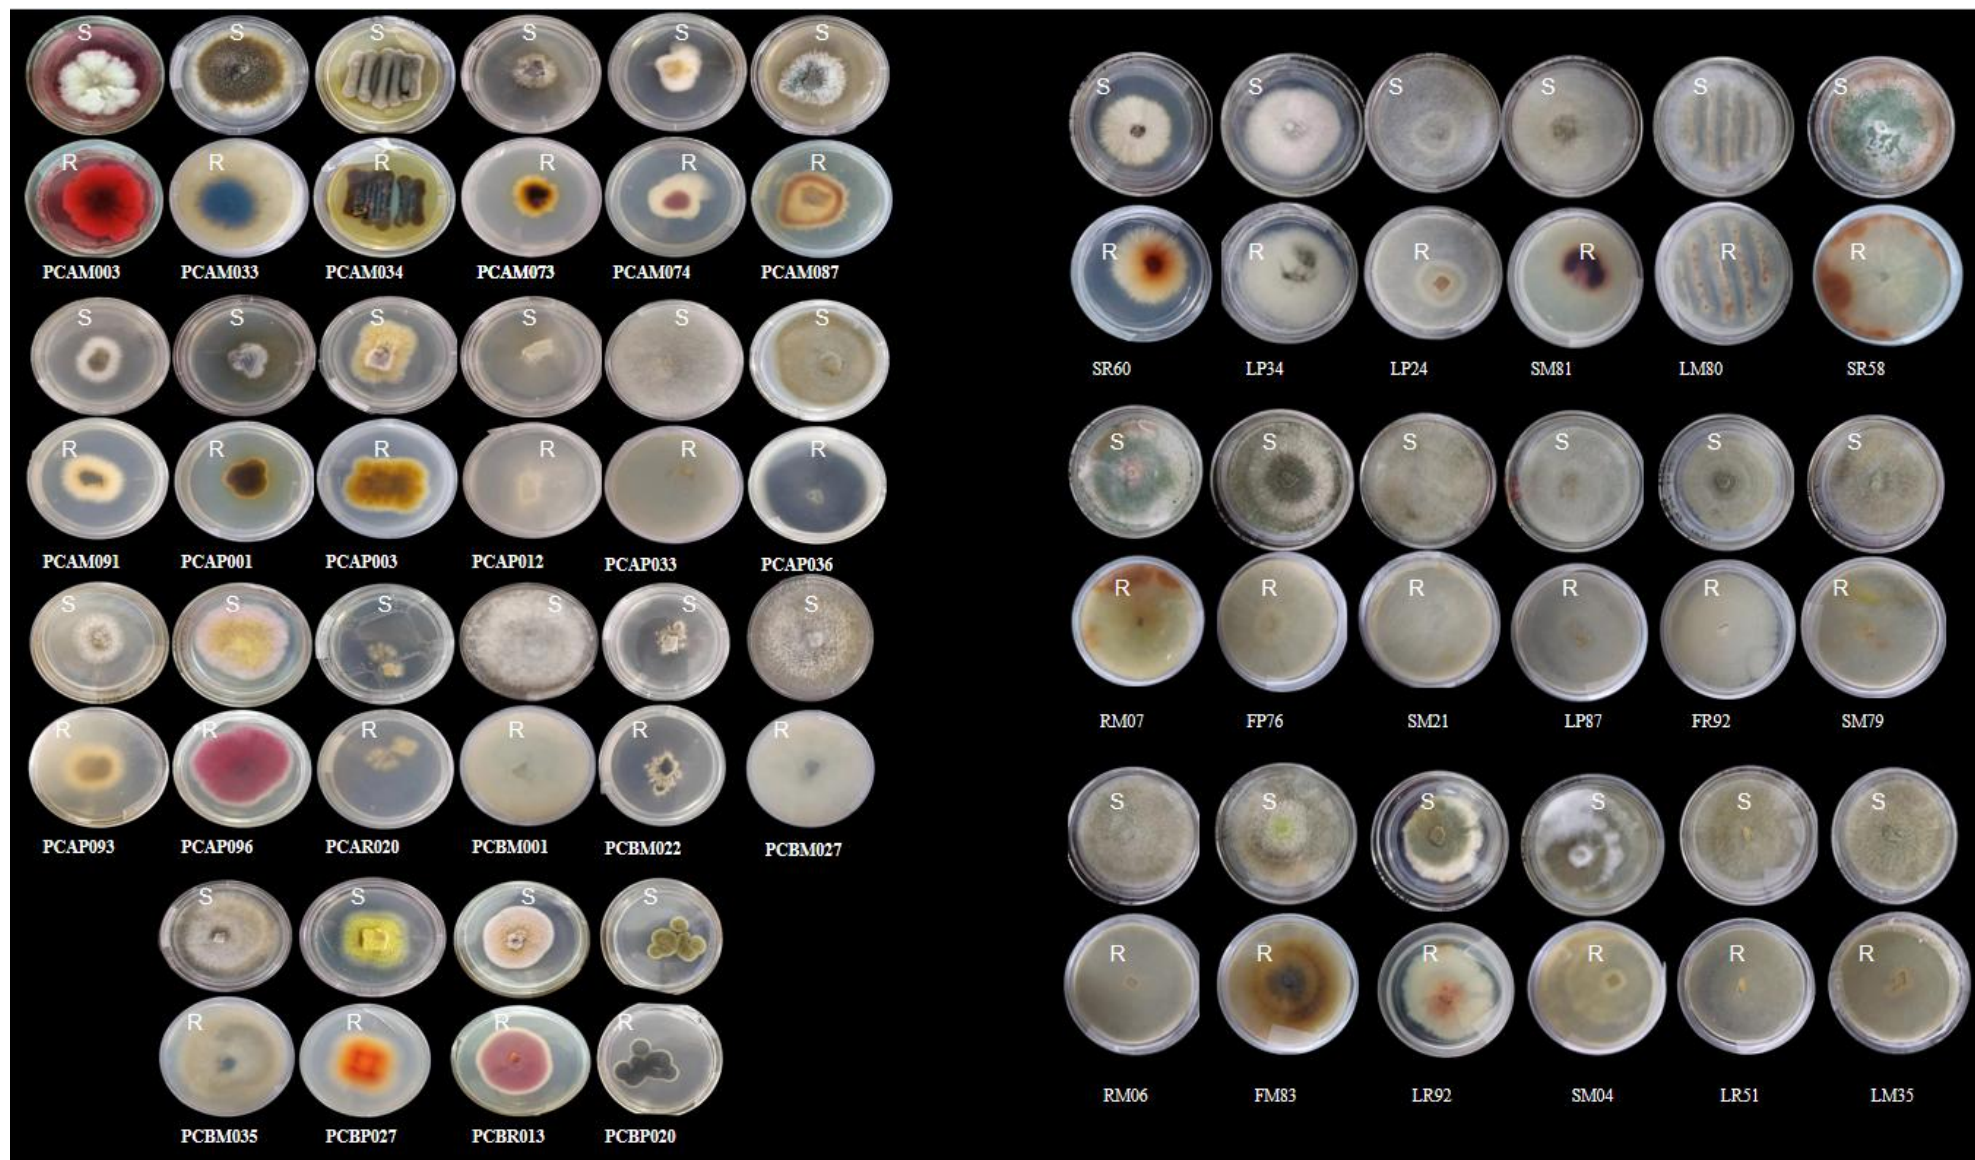

**Figure S3.** Colonies of some endophytic fungi isolated from *P. crotalarioides* on PDA cultured for 5 days. S: Surface view of culture on PDA. R: Reverse view of culture on PDA.
