# Supplementary material for: Community Structure and Diversity of Endophytic Fungi in Cultivated Polygala crotalarioides at Two Different Growth Stages Based on Culture-Independent and Culture-Based Methods
Source: MDPI journal article supplement (doi:10.3390/jof10030195), 2024-03-04
Supplement: s1 [file s1]

**Table S4.** Comparison of community structure of endophytic fungi detected with high-throughput sequencing at each classification level.

| sample        | source | Phylum | Class | Order | Family | Genus | Species | OTU |
|---------------|--------|--------|-------|-------|--------|-------|---------|-----|
| 1-year sample | leaf   | 4      | 15    | 34    | 68     | 99    | 121     | 204 |
|               | stem   | 4      | 16    | 36    | 75     | 99    | 113     | 164 |
|               | root   | 5      | 17    | 30    | 48     | 55    | 57      | 121 |
|               | total  | 7      | 21    | 49    | 103    | 156   | 191     | 355 |
| 2-year sample | leaf   | 3      | 13    | 30    | 61     | 92    | 128     | 218 |
|               | stem   | 5      | 24    | 68    | 161    | 276   | 418     | 829 |
|               | root   | 7      | 18    | 33    | 59     | 86    | 102     | 143 |
|               | total  | 7      | 27    | 74    | 175    | 323   | 489     | 981 |
