# Supplementary material for: Community Structure and Diversity of Endophytic Fungi in Cultivated Polygala crotalarioides at Two Different Growth Stages Based on Culture-Independent and Culture-Based Methods
Source: MDPI journal article supplement (doi:10.3390/jof10030195), 2024-03-04
Supplement: s1 [file s1]

**Table S5.** Taxonomic information of all endophytic fungi isolated from *P. crotalarioides*.

| source      | strain No. | Species                        | phylum     | class           | order             | family              |
|-------------|------------|--------------------------------|------------|-----------------|-------------------|---------------------|
| 1-year leaf | PCAM095    | <i>Coniochaeta velutina</i>    | Ascomycota | Sordariomycetes | Hypocreales       | Coniochaetaceae     |
|             | PCAM033    | <i>Didymella bellidis</i>      | Ascomycota | Dothideomycetes | Pleosporales      | Didymellaceae       |
|             | PCAM078    | <i>Didymella bellidis</i>      | Ascomycota | Dothideomycetes | Pleosporales      | Didymellaceae       |
|             | PCAM091    | <i>Didymella bellidis</i>      | Ascomycota | Dothideomycetes | Pleosporales      | Didymellaceae       |
|             | PCAM003    | <i>Fusarium tricinctum</i>     | Ascomycota | Sordariomycetes | Hypocreales       | Nectriaceae         |
|             | PCAM074    | <i>Fusarium tricinctum</i>     | Ascomycota | Sordariomycetes | Hypocreales       | Nectriaceae         |
|             | PCAM073    | <i>Pezicula Chiangraiensis</i> | Ascomycota | Leotiomyces     | Helotiales        | Dermateaceae        |
|             | PCAM010    | <i>Phialophora mustea</i>      | Ascomycota | Eurotiomycetes  | Chaetothyriales   | Herpotrichiellaceae |
|             | PCAM034    | <i>Phialophora</i> sp.         | Ascomycota | Eurotiomycetes  | Chaetothyriales   | Herpotrichiellaceae |
|             | PCAM087    | <i>Talaromyces funiculosus</i> | Ascomycota | Eurotiomycetes  | Chaetothyriales   | Trichocomaceae      |
| 1-year stem | PCAP041    | <i>Alternaria alternata</i>    | Ascomycota | Dothideomycetes | Pleosporales      | Pleosporaceae       |
|             | PCAR020    | <i>Coniochaeta velutina</i>    | Ascomycota | Sordariomycetes | Hypocreales       | Coniochaetaceae     |
|             | PCAP033    | <i>Fusarium petersiae</i>      | Ascomycota | Sordariomycetes | Hypocreales       | Nectriaceae         |
|             | PCAP003    | <i>Fusarium reticulatum</i>    | Ascomycota | Sordariomycetes | Hypocreales       | Nectriaceae         |
|             | PCAP096    | <i>Fusarium reticulatum</i>    | Ascomycota | Sordariomycetes | Hypocreales       | Nectriaceae         |
|             | PCAP012    | <i>Geotrichum candidum</i>     | Ascomycota | Saccharomycetes | Saccharomycetales | Dipodascaceae       |
|             | PCAP036    | <i>Juxtiphoma</i> sp.          | Ascomycota | Dothideomycetes | Pleosporales      | Didymellaceae       |
|             | PCAP093    | <i>Pezicula sporulosa</i>      | Ascomycota | Leotiomyces     | Helotiales        | Dermateaceae        |
|             | PCAP001    | <i>Phialophora mustea</i>      | Ascomycota | Eurotiomycetes  | Chaetothyriales   | Herpotrichiellaceae |

|             |         |                                       |            |                 |                 |                 |
|-------------|---------|---------------------------------------|------------|-----------------|-----------------|-----------------|
| 1-year root | PCBM001 | <i>Botrytis cinerea</i>               | Ascomycota | Leotiomycetes   | Helotiales      | Sclerotiniaceae |
|             | PCBM035 | <i>Botrytis cinerea</i>               | Ascomycota | Leotiomycetes   | Helotiales      | Sclerotiniaceae |
|             | PCBR020 | <i>Cladosporium</i> sp.               | Ascomycota | Dothideomycetes | Pleosporales    | Cladosporiaceae |
|             | PCBR013 | <i>Colletotrichum acutatum</i>        | Ascomycota | Sordariomycetes | Hypocreales     | Glomerellaceae  |
|             | PCBM022 | <i>Colletotrichum dematium</i>        | Ascomycota | Sordariomycetes | Hypocreales     | Glomerellaceae  |
|             | PCBM027 | <i>Diaporthe nobilis</i>              | Ascomycota | Sordariomycetes | Hypocreales     | Diaporthaceae   |
|             | PCBP027 | <i>Talaromyces muroii</i>             | Ascomycota | Eurotiomycetes  | Chaetothyriales | Trichocomaceae  |
| 2-year leaf | LM17    | <i>Alternaria alternata</i>           | Ascomycota | Dothideomycetes | Pleosporales    | Pleosporaceae   |
|             | LM80    | <i>Alternaria blumeae</i>             | Ascomycota | Dothideomycetes | Pleosporales    | Pleosporaceae   |
|             | LR87    | <i>Colletotrichum boninense</i>       | Ascomycota | Sordariomycetes | Glomerellales   | Glomerellaceae  |
|             | LR51    | <i>Colletotrichum gloeosporioides</i> | Ascomycota | Sordariomycetes | Glomerellales   | Glomerellaceae  |
|             | LP24    | <i>Colletotrichum horii</i>           | Ascomycota | Sordariomycetes | Glomerellales   | Glomerellaceae  |
|             | LP41    | <i>Fusarium oxysporum</i>             | Ascomycota | Sordariomycetes | Hypocreales     | Nectriaceae     |
|             | LM35    | <i>Leptosphaerulina arachidicola</i>  | Ascomycota | Dothideomycetes | Pleosporales    | Didymellaceae   |
|             | LP34    | <i>Nigrospora chinensis</i>           | Ascomycota | Sordariomycetes | Xylariales      | Apiosporaceae   |
|             | LR43    | <i>Nigrospora chinensis</i>           | Ascomycota | Sordariomycetes | Xylariales      | Apiosporaceae   |
|             | LR62    | <i>Nigrospora osmanthi</i>            | Ascomycota | Sordariomycetes | Xylariales      | Apiosporaceae   |
|             | LR101   | <i>Nigrospora rubi</i>                | Ascomycota | Sordariomycetes | Xylariales      | Apiosporaceae   |
|             | LP01    | <i>Penicillium brefeldianum</i>       | Ascomycota | Eurotiomycetes  | Eurotiales      | Aspergillaceae  |
|             | LP851   | <i>Penicillium brefeldianum</i>       | Ascomycota | Eurotiomycetes  | Eurotiales      | Aspergillaceae  |
|             | LP87    | <i>Pyronema omphalodes</i>            | Ascomycota | Pezizomycetes   | Pezizales       | Pyronemataceae  |

|             |      |                                  |               |                 |               |                  |
|-------------|------|----------------------------------|---------------|-----------------|---------------|------------------|
| 2-year stem | SR58 | <i>Chaetomium cochliodes</i>     | Ascomycota    | Sordariomycetes | Sordariales   | Chaetomiaceae    |
|             | SR60 | <i>Fusarium oxysporum</i>        | Ascomycota    | Sordariomycetes | Hypocreales   | Nectriaceae      |
|             | SM21 | <i>Nigrospora chinensis</i>      | Ascomycota    | Sordariomycetes | Xylariales    | Apiosporaceae    |
|             | SM40 | <i>Nigrospora rubi</i>           | Ascomycota    | Sordariomycetes | Xylariales    | Apiosporaceae    |
|             | SM79 | <i>Pestalotiopsis kenyana</i>    | Ascomycota    | Sordariomycetes | Xylariales    | Sporocadaceae    |
|             | SM81 | <i>Phoma herbarum</i>            | Ascomycota    | Dothideomycetes | Pleosporales  | Didymellaceae    |
|             | SM04 | <i>Schizophyllum commune</i>     | Basidiomycota | Agaricomycetes  | Agaricales    | Schizophyllaceae |
| 2-year root | FR89 | <i>Alternaria alternata</i>      | Ascomycota    | Dothideomycetes | Pleosporales  | Pleosporaceae    |
|             | RR09 | <i>Aspergillus</i> sp.           | Ascomycota    | Eurotiomycetes  | Eurotiales    | Aspergillaceae   |
|             | FM25 | <i>Colletotrichum horii</i>      | Ascomycota    | Sordariomycetes | Glomerellales | Glomerellaceae   |
|             | FP76 | <i>Diaporthe unshiuensis</i>     | Ascomycota    | Sordariomycetes | Diaporthales  | Diaporthaceae    |
|             | RM07 | <i>Epicoccum nigrum</i>          | Ascomycota    | Dothideomycetes | Pleosporales  | Didymellaceae    |
|             | FM83 | <i>Epicoccum sorghinum</i>       | Ascomycota    | Dothideomycetes | Pleosporales  | Didymellaceae    |
|             | FR92 | <i>Periconia pseudobyssoides</i> | Ascomycota    | Dothideomycetes | Pleosporales  | Periconiaceae    |
|             | RM06 | <i>Schizophyllum commune</i>     | Basidiomycota | Agaricomycetes  | Agaricales    | Schizophyllaceae |
