# Supplementary material for: Community Structure and Diversity of Endophytic Fungi in Cultivated Polygala crotalarioides at Two Different Growth Stages Based on Culture-Independent and Culture-Based Methods
Source: J Fungi (Basel). 2024 Mar 4;10(3):195. doi: 10.3390/jof10030195 (PMC10970964; doi:10.3390/jof10030195)
Supplement: Supplementary file 1 [file jof-10-00195-s001.zip]

Archive with 8 entries (8 files):
- Figure S1.pdf
- Figure S2.pdf
- Figure S3.pdf
- Table S1 OTUs of endophytic fungi from P. crotalarioides at two different growth stages.xls
- Table S2 OTUs of endophytic fungi from 1-year P. crotalarioides.xlsx
- Table S3 OTUs of endophytic fungi from 2-year P. crotalarioides.xlsx
- Table S4.pdf
- Table S5.pdf
