# Supplementary material for: Community Structure and Diversity of Endophytic Fungi in Cultivated Polygala crotalarioides at Two Different Growth Stages Based on Culture-Independent and Culture-Based Methods
Source: J Fungi (Basel). 2024 Mar 4;10(3):195. doi: 10.3390/jof10030195 (PMC10970964; doi:10.3390/jof10030195)
Supplement: Supplementary file 1 [file jof-10-00195-s001.zip › Table S1 OTUs of endophytic fungi from P. crotalarioides at two different growth stages.xls]

## Sheet: Table S1 OTUs of endophytic fun
Table S1 OTUs of endophytic fungi from P. crotalarioides at two different growth stages
Domain	Kingdom	Phylum	Class	Order	Family	Genus	Species	OTU	Total	Percent	Prevalence
d__Eukaryota	k__Fungi	p__unclassified_k__Fungi	c__unclassified_k__Fungi	o__unclassified_k__Fungi	f__unclassified_k__Fungi	g__unclassified_k__Fungi	s__unclassified_k__Fungi	OTU1381	4	7.14082e-06	0.0555556
d__Eukaryota	k__Fungi	p__Ascomycota	c__unclassified_p__Ascomycota	o__unclassified_p__Ascomycota	f__unclassified_p__Ascomycota	g__unclassified_p__Ascomycota	s__unclassified_p__Ascomycota	OTU1143	2	3.57041e-06	0.0555556
d__Eukaryota	k__Fungi	p__Ascomycota	c__Eurotiomycetes	o__Chaetothyriales	f__Herpotrichiellaceae	g__Cladophialophora	s__Cladophialophora_sp	OTU1168	93	0.000166024	0.111111
d__Eukaryota	k__Fungi	p__Ascomycota	c__Lecanoromycetes	o__Lecanorales	f__Pilocarpaceae	g__Fellhanera	s__Fellhanera_bouteillei	OTU1041	7	1.24964e-05	0.166667
d__Eukaryota	k__Fungi	p__Ascomycota	c__Lecanoromycetes	o__Ostropales	f__Stictidaceae	g__unclassified_f__Stictidaceae	s__Stictidaceae_sp	OTU1256	4	7.14082e-06	0.166667
d__Eukaryota	k__Fungi	p__Ascomycota	c__Dothideomycetes	o__Pleosporales	f__unclassified_o__Pleosporales	g__unclassified_o__Pleosporales	s__unclassified_o__Pleosporales	OTU1151	1	1.7852e-06	0.0555556
d__Eukaryota	k__Fungi	p__Ascomycota	c__Sordariomycetes	o__Xylariales	f__unclassified_o__Xylariales	g__unclassified_o__Xylariales	s__unclassified_o__Xylariales	OTU645	13	2.32077e-05	0.0555556
d__Eukaryota	k__Fungi	p__Ascomycota	c__Dothideomycetes	o__Pleosporales	f__Didymosphaeriaceae	g__Montagnula	s__Montagnula_sp	OTU1880	36	6.42674e-05	0.0555556
d__Eukaryota	k__Fungi	p__Ascomycota	c__Dothideomycetes	o__Capnodiales	f__Teratosphaeriaceae	g__Catenulostroma	s__Catenulostroma_corymbiae	OTU823	6	1.07112e-05	0.0555556
d__Eukaryota	k__Fungi	p__Ascomycota	c__Sordariomycetes	o__Diaporthales	f__Diaporthaceae	g__Diaporthe	s__unclassified_g__Diaporthe	OTU1479	11	1.96372e-05	0.111111
d__Eukaryota	k__Fungi	p__Ascomycota	c__unclassified_p__Ascomycota	o__unclassified_p__Ascomycota	f__unclassified_p__Ascomycota	g__unclassified_p__Ascomycota	s__unclassified_p__Ascomycota	OTU1359	4	7.14082e-06	0.111111
d__Eukaryota	k__Fungi	p__Ascomycota	c__Dothideomycetes	o__Pleosporales	f__Periconiaceae	g__unclassified_f__Periconiaceae	s__unclassified_f__Periconiaceae	OTU1241	4	7.14082e-06	0.0555556
d__Eukaryota	k__Fungi	p__Ascomycota	c__Sordariomycetes	o__Hypocreales	f__Nectriaceae	g__Fusarium	s__unclassified_g__Fusarium	OTU1520	72113	0.128736	1
d__Eukaryota	k__Fungi	p__Ascomycota	c__Sordariomycetes	o__Xylariales	f__Xylariaceae	g__unclassified_f__Xylariaceae	s__unclassified_f__Xylariaceae	OTU1043	2	3.57041e-06	0.0555556
d__Eukaryota	k__Fungi	p__Ascomycota	c__Sordariomycetes	o__Diaporthales	f__Diaporthaceae	g__Diaporthe	s__unclassified_g__Diaporthe	OTU1129	102	0.000182091	0.111111
d__Eukaryota	k__Fungi	p__Ascomycota	c__Sordariomycetes	o__Xylariales	f__unclassified_o__Xylariales	g__unclassified_o__Xylariales	s__unclassified_o__Xylariales	OTU1386	3	5.35561e-06	0.0555556
d__Eukaryota	k__Fungi	p__Ascomycota	c__Dothideomycetes	o__Capnodiales	f__Cladosporiaceae	g__Cladosporium	s__Cladosporium_sphaerospermum	OTU583	714	0.00127464	0.611111
d__Eukaryota	k__Fungi	p__Ascomycota	c__Eurotiomycetes	o__Chaetothyriales	f__Cyphellophoraceae	g__Cyphellophora	s__unclassified_g__Cyphellophora	OTU1116	7	1.24964e-05	0.0555556
d__Eukaryota	k__Fungi	p__Basidiomycota	c__Agaricomycetes	o__Thelephorales	f__Thelephoraceae	g__unclassified_f__Thelephoraceae	s__unclassified_f__Thelephoraceae	OTU1267	6	1.07112e-05	0.0555556
d__Eukaryota	k__Fungi	p__unclassified_k__Fungi	c__unclassified_k__Fungi	o__unclassified_k__Fungi	f__unclassified_k__Fungi	g__unclassified_k__Fungi	s__unclassified_k__Fungi	OTU765	61	0.000108897	0.0555556
d__Eukaryota	k__Fungi	p__Ascomycota	c__Dothideomycetes	o__Venturiales	f__Sympoventuriaceae	g__Neocoleroa	s__Neocoleroa_metrosideri	OTU1449	116	0.000207084	0.111111
d__Eukaryota	k__Fungi	p__unclassified_k__Fungi	c__unclassified_k__Fungi	o__unclassified_k__Fungi	f__unclassified_k__Fungi	g__unclassified_k__Fungi	s__unclassified_k__Fungi	OTU763	14	2.49929e-05	0.166667
d__Eukaryota	k__Fungi	p__Ascomycota	c__Leotiomycetes	o__Helotiales	f__Dermateaceae	g__Trimmatostroma	s__Trimmatostroma_cordae	OTU332	8	1.42816e-05	0.0555556
d__Eukaryota	k__Fungi	p__Basidiomycota	c__Agaricomycetes	o__Phallales	f__unclassified_o__Phallales	g__unclassified_o__Phallales	s__Phallales_sp	OTU997	2	3.57041e-06	0.0555556
d__Eukaryota	k__Fungi	p__Basidiomycota	c__Agaricomycetes	o__Trechisporales	f__Hydnodontaceae	g__Trechispora	s__unclassified_g__Trechispora	OTU1330	11	1.96372e-05	0.0555556
d__Eukaryota	k__Fungi	p__Basidiomycota	c__Agaricomycetes	o__Trechisporales	f__Hydnodontaceae	g__Trechispora	s__unclassified_g__Trechispora	OTU1331	6	1.07112e-05	0.0555556
d__Eukaryota	k__Fungi	p__Basidiomycota	c__Tremellomycetes	o__Tremellales	f__Trimorphomycetaceae	g__Saitozyma	s__Saitozyma_paraflava	OTU920	228	0.000407027	0.111111
d__Eukaryota	k__Fungi	p__Ascomycota	c__Dothideomycetes	o__Pleosporales	f__Didymosphaeriaceae	g__Letendraea	s__Letendraea_helminthicola	OTU576	43	7.67638e-05	0.166667
d__Eukaryota	k__Fungi	p__unclassified_k__Fungi	c__unclassified_k__Fungi	o__unclassified_k__Fungi	f__unclassified_k__Fungi	g__unclassified_k__Fungi	s__unclassified_k__Fungi	OTU1166	3	5.35561e-06	0.111111
d__Eukaryota	k__Fungi	p__unclassified_k__Fungi	c__unclassified_k__Fungi	o__unclassified_k__Fungi	f__unclassified_k__Fungi	g__unclassified_k__Fungi	s__unclassified_k__Fungi	OTU1167	15	2.67781e-05	0.0555556
d__Eukaryota	k__Fungi	p__Ascomycota	c__Eurotiomycetes	o__Chaetothyriales	f__Chaetothyriaceae	g__unclassified_f__Chaetothyriaceae	s__unclassified_f__Chaetothyriaceae	OTU1269	5	8.92602e-06	0.0555556
d__Eukaryota	k__Fungi	p__Ascomycota	c__Eurotiomycetes	o__Chaetothyriales	f__Cyphellophoraceae	g__Cyphellophora	s__Cyphellophora_laciniata	OTU538	15	2.67781e-05	0.0555556
d__Eukaryota	k__Fungi	p__Basidiomycota	c__Tremellomycetes	o__Tremellales	f__Bulleribasidiaceae	g__Vishniacozyma	s__unclassified_g__Vishniacozyma	OTU131	101	0.000180306	0.277778
d__Eukaryota	k__Fungi	p__Basidiomycota	c__Microbotryomycetes	o__Sporidiobolales	f__Sporidiobolaceae	g__Rhodosporidiobolus	s__Rhodosporidiobolus_fluvialis	OTU889	7	1.24964e-05	0.0555556
d__Eukaryota	k__Fungi	p__Ascomycota	c__Eurotiomycetes	o__Chaetothyriales	f__Cyphellophoraceae	g__Cyphellophora	s__unclassified_g__Cyphellophora	OTU944	9	1.60668e-05	0.0555556
d__Eukaryota	k__Fungi	p__Ascomycota	c__Dothideomycetes	o__Pleosporales	f__Biatriosporaceae	g__Biatriospora	s__Biatriospora_sp	OTU1176	6	1.07112e-05	0.0555556
d__Eukaryota	k__Fungi	p__Ascomycota	c__Sordariomycetes	o__unclassified_c__Sordariomycetes	f__unclassified_c__Sordariomycetes	g__unclassified_c__Sordariomycetes	s__unclassified_c__Sordariomycetes	OTU959	21	3.74893e-05	0.166667
d__Eukaryota	k__Fungi	p__Ascomycota	c__Eurotiomycetes	o__Chaetothyriales	f__Herpotrichiellaceae	g__Exophiala	s__unclassified_g__Exophiala	OTU274	7	1.24964e-05	0.111111
d__Eukaryota	k__Fungi	p__Ascomycota	c__Eurotiomycetes	o__Eurotiales	f__Trichocomaceae	g__Talaromyces	s__Talaromyces_stollii	OTU891	4575	0.00816731	0.611111
d__Eukaryota	k__Fungi	p__Ascomycota	c__Sordariomycetes	o__Diaporthales	f__Diaporthaceae	g__Diaporthe	s__unclassified_g__Diaporthe	OTU793	7	1.24964e-05	0.166667
d__Eukaryota	k__Fungi	p__Ascomycota	c__Sordariomycetes	o__Diaporthales	f__Diaporthaceae	g__Diaporthe	s__unclassified_g__Diaporthe	OTU820	10	1.7852e-05	0.0555556
d__Eukaryota	k__Fungi	p__Basidiomycota	c__Agaricomycetes	o__Polyporales	f__Ganodermataceae	g__Ganoderma	s__Ganoderma_australe	OTU1280	23	4.10597e-05	0.111111
d__Eukaryota	k__Fungi	p__Basidiomycota	c__unclassified_p__Basidiomycota	o__unclassified_p__Basidiomycota	f__unclassified_p__Basidiomycota	g__unclassified_p__Basidiomycota	s__unclassified_p__Basidiomycota	OTU1268	1	1.7852e-06	0.0555556
d__Eukaryota	k__Fungi	p__Basidiomycota	c__unclassified_p__Basidiomycota	o__unclassified_p__Basidiomycota	f__unclassified_p__Basidiomycota	g__unclassified_p__Basidiomycota	s__unclassified_p__Basidiomycota	OTU1463	2	3.57041e-06	0.0555556
d__Eukaryota	k__Fungi	p__Mortierellomycota	c__Mortierellomycetes	o__Mortierellales	f__Mortierellaceae	g__Mortierella	s__unclassified_g__Mortierella	OTU880	38	6.78378e-05	0.0555556
d__Eukaryota	k__Fungi	p__Ascomycota	c__Dothideomycetes	o__Capnodiales	f__Cladosporiaceae	g__Rachicladosporium	s__unclassified_g__Rachicladosporium	OTU1357	4	7.14082e-06	0.0555556
d__Eukaryota	k__Fungi	p__unclassified_k__Fungi	c__unclassified_k__Fungi	o__unclassified_k__Fungi	f__unclassified_k__Fungi	g__unclassified_k__Fungi	s__unclassified_k__Fungi	OTU990	4	7.14082e-06	0.0555556
d__Eukaryota	k__Fungi	p__unclassified_k__Fungi	c__unclassified_k__Fungi	o__unclassified_k__Fungi	f__unclassified_k__Fungi	g__unclassified_k__Fungi	s__unclassified_k__Fungi	OTU993	2	3.57041e-06	0.0555556
d__Eukaryota	k__Fungi	p__Ascomycota	c__Sordariomycetes	o__Sordariales	f__Sordariales_fam_Incertae_sedis	g__Conlarium	s__Conlarium_aquaticum	OTU708	68	0.000121394	0.0555556
d__Eukaryota	k__Fungi	p__Ascomycota	c__Sordariomycetes	o__Hypocreales	f__Nectriaceae	g__Fusicolla	s__Fusicolla_sp	OTU1341	13	2.32077e-05	0.0555556
d__Eukaryota	k__Fungi	p__Ascomycota	c__Eurotiomycetes	o__Chaetothyriales	f__Herpotrichiellaceae	g__Cladophialophora	s__unclassified_g__Cladophialophora	OTU1197	10	1.7852e-05	0.0555556
d__Eukaryota	k__Fungi	p__Ascomycota	c__Dothideomycetes	o__Capnodiales	f__Teratosphaeriaceae	g__Devriesia	s__Devriesia_strelitziicola	OTU1279	2	3.57041e-06	0.0555556
d__Eukaryota	k__Fungi	p__Ascomycota	c__Eurotiomycetes	o__Chaetothyriales	f__Cyphellophoraceae	g__Cyphellophora	s__Cyphellophora_europaea	OTU983	55	9.81862e-05	0.277778
d__Eukaryota	k__Fungi	p__Ascomycota	c__Sordariomycetes	o__Hypocreales	f__Ophiocordycipitaceae	g__Ophiocordyceps	s__Ophiocordyceps_sp	OTU1011	5	8.92602e-06	0.111111
d__Eukaryota	k__Fungi	p__Ascomycota	c__Eurotiomycetes	o__Chaetothyriales	f__Herpotrichiellaceae	g__Cladophialophora	s__unclassified_g__Cladophialophora	OTU409	15	2.67781e-05	0.0555556
d__Eukaryota	k__Fungi	p__Ascomycota	c__Eurotiomycetes	o__Chaetothyriales	f__Chaetothyriales_fam_Incertae_sedis	g__Strelitziana	s__Strelitziana_eucalypti	OTU956	15	2.67781e-05	0.111111
d__Eukaryota	k__Fungi	p__Ascomycota	c__Sordariomycetes	o__Xylariales	f__Xylariaceae	g__Hypoxylon	s__Hypoxylon_fendleri	OTU1131	9	1.60668e-05	0.166667
d__Eukaryota	k__Fungi	p__Ascomycota	c__unclassified_p__Ascomycota	o__unclassified_p__Ascomycota	f__unclassified_p__Ascomycota	g__unclassified_p__Ascomycota	s__unclassified_p__Ascomycota	OTU1038	3	5.35561e-06	0.0555556
d__Eukaryota	k__Fungi	p__Ascomycota	c__Sordariomycetes	o__Xylariales	f__Amphisphaeriaceae	g__Amphisphaeria	s__unclassified_g__Amphisphaeria	OTU733	66	0.000117823	0.0555556
d__Eukaryota	k__Fungi	p__Basidiomycota	c__Agaricomycetes	o__Agaricales	f__Lycoperdaceae	g__unclassified_f__Lycoperdaceae	s__unclassified_f__Lycoperdaceae	OTU2033	2	3.57041e-06	0.0555556
d__Eukaryota	k__Fungi	p__Basidiomycota	c__Agaricomycetes	o__unclassified_c__Agaricomycetes	f__unclassified_c__Agaricomycetes	g__unclassified_c__Agaricomycetes	s__unclassified_c__Agaricomycetes	OTU1027	1	1.7852e-06	0.0555556
d__Eukaryota	k__Fungi	p__Ascomycota	c__Sordariomycetes	o__Xylariales	f__Xylariaceae	g__Xylaria	s__Xylaria_acuminatilongissima	OTU2034	18	3.21337e-05	0.0555556
d__Eukaryota	k__Fungi	p__Ascomycota	c__Sordariomycetes	o__Xylariales	f__Xylariaceae	g__Hypoxylon	s__Hypoxylon_monticulosum	OTU1200	13	2.32077e-05	0.111111
d__Eukaryota	k__Fungi	p__Ascomycota	c__Eurotiomycetes	o__Eurotiales	f__Aspergillaceae	g__Penicillium	s__unclassified_g__Penicillium	OTU1122	128	0.000228506	0.166667
d__Eukaryota	k__Fungi	p__Basidiomycota	c__Tremellomycetes	o__Tremellales	f__Bulleribasidiaceae	g__Derxomyces	s__Derxomyces_sp	OTU871	8	1.42816e-05	0.0555556
d__Eukaryota	k__Fungi	p__Ascomycota	c__Eurotiomycetes	o__Chaetothyriales	f__Cyphellophoraceae	g__Cyphellophora	s__Cyphellophora_olivacea	OTU1427	18	3.21337e-05	0.0555556
d__Eukaryota	k__Fungi	p__unclassified_k__Fungi	c__unclassified_k__Fungi	o__unclassified_k__Fungi	f__unclassified_k__Fungi	g__unclassified_k__Fungi	s__unclassified_k__Fungi	OTU1155	4	7.14082e-06	0.111111
d__Eukaryota	k__Fungi	p__Basidiomycota	c__Agaricomycetes	o__Agaricales	f__Strophariaceae	g__Deconica	s__Deconica_sp	OTU1735	14	2.49929e-05	0.111111
d__Eukaryota	k__Fungi	p__Basidiomycota	c__Agaricomycetes	o__Agaricales	f__Psathyrellaceae	g__Coprinopsis	s__Coprinopsis_sclerotiger	OTU587	28	4.99857e-05	0.0555556
d__Eukaryota	k__Fungi	p__Ascomycota	c__Sordariomycetes	o__Coniochaetales	f__Coniochaetaceae	g__Coniochaeta	s__unclassified_g__Coniochaeta	OTU1265	2	3.57041e-06	0.0555556
d__Eukaryota	k__Fungi	p__Ascomycota	c__Lecanoromycetes	o__Lecanorales	f__Ramalinaceae	g__unclassified_f__Ramalinaceae	s__unclassified_f__Ramalinaceae	OTU1246	174	0.000310626	0.111111
d__Eukaryota	k__Fungi	p__Ascomycota	c__Sordariomycetes	o__Xylariales	f__Amphisphaeriaceae	g__Lepteutypa	s__unclassified_g__Lepteutypa	OTU559	4	7.14082e-06	0.111111
d__Eukaryota	k__Fungi	p__Ascomycota	c__Dothideomycetes	o__Pleosporales	f__Phaeosphaeriaceae	g__Setophoma	s__Setophoma_sacchari	OTU2061	1	1.7852e-06	0.0555556
d__Eukaryota	k__Fungi	p__Ascomycota	c__Eurotiomycetes	o__Eurotiales	f__Aspergillaceae	g__Aspergillus	s__Aspergillus_gracilis	OTU859	24	4.28449e-05	0.0555556
d__Eukaryota	k__Fungi	p__Ascomycota	c__Pezizomycetes	o__Pezizales	f__Pezizaceae	g__unclassified_f__Pezizaceae	s__unclassified_f__Pezizaceae	OTU633	1	1.7852e-06	0.0555556
d__Eukaryota	k__Fungi	p__Ascomycota	c__Sordariomycetes	o__Diaporthales	f__Diaporthaceae	g__Diaporthe	s__unclassified_g__Diaporthe	OTU1062	2	3.57041e-06	0.0555556
d__Eukaryota	k__Fungi	p__Ascomycota	c__unclassified_p__Ascomycota	o__unclassified_p__Ascomycota	f__unclassified_p__Ascomycota	g__unclassified_p__Ascomycota	s__unclassified_p__Ascomycota	OTU624	23648	0.0422165	0.5
d__Eukaryota	k__Fungi	p__Ascomycota	c__Sordariomycetes	o__Xylariales	f__unclassified_o__Xylariales	g__unclassified_o__Xylariales	s__unclassified_o__Xylariales	OTU1350	20	3.57041e-05	0.111111
d__Eukaryota	k__Fungi	p__unclassified_k__Fungi	c__unclassified_k__Fungi	o__unclassified_k__Fungi	f__unclassified_k__Fungi	g__unclassified_k__Fungi	s__unclassified_k__Fungi	OTU1024	2	3.57041e-06	0.0555556
d__Eukaryota	k__Fungi	p__Basidiomycota	c__Agaricomycetes	o__Agaricales	f__Psathyrellaceae	g__Coprinellus	s__Coprinellus_angulatus	OTU1295	2	3.57041e-06	0.0555556
d__Eukaryota	k__Fungi	p__Basidiomycota	c__Agaricomycetes	o__Agaricales	f__Strophariaceae	g__Deconica	s__Deconica_sp	OTU1641	8	1.42816e-05	0.0555556
d__Eukaryota	k__Fungi	p__Ascomycota	c__Eurotiomycetes	o__Chaetothyriales	f__Chaetothyriales_fam_Incertae_sedis	g__Strelitziana	s__unclassified_g__Strelitziana	OTU1301	4	7.14082e-06	0.0555556
d__Eukaryota	k__Fungi	p__Ascomycota	c__Sordariomycetes	o__unclassified_c__Sordariomycetes	f__unclassified_c__Sordariomycetes	g__unclassified_c__Sordariomycetes	s__unclassified_c__Sordariomycetes	OTU564	81	0.000144602	0.166667
d__Eukaryota	k__Fungi	p__Ascomycota	c__Sordariomycetes	o__unclassified_c__Sordariomycetes	f__unclassified_c__Sordariomycetes	g__unclassified_c__Sordariomycetes	s__unclassified_c__Sordariomycetes	OTU769	5	8.92602e-06	0.166667
d__Eukaryota	k__Fungi	p__Ascomycota	c__Dothideomycetes	o__Capnodiales	f__unclassified_o__Capnodiales	g__unclassified_o__Capnodiales	s__unclassified_o__Capnodiales	OTU1355	11	1.96372e-05	0.0555556
d__Eukaryota	k__Fungi	p__Ascomycota	c__Eurotiomycetes	o__Chaetothyriales	f__unclassified_o__Chaetothyriales	g__unclassified_o__Chaetothyriales	s__unclassified_o__Chaetothyriales	OTU1417	3	5.35561e-06	0.0555556
d__Eukaryota	k__Fungi	p__Ascomycota	c__Sordariomycetes	o__unclassified_c__Sordariomycetes	f__unclassified_c__Sordariomycetes	g__unclassified_c__Sordariomycetes	s__unclassified_c__Sordariomycetes	OTU1117	6	1.07112e-05	0.0555556
d__Eukaryota	k__Fungi	p__Ascomycota	c__Dothideomycetes	o__Pleosporales	f__unclassified_o__Pleosporales	g__unclassified_o__Pleosporales	s__unclassified_o__Pleosporales	OTU1364	80	0.000142816	0.0555556
d__Eukaryota	k__Fungi	p__Ascomycota	c__Eurotiomycetes	o__unclassified_c__Eurotiomycetes	f__unclassified_c__Eurotiomycetes	g__unclassified_c__Eurotiomycetes	s__unclassified_c__Eurotiomycetes	OTU1182	4	7.14082e-06	0.111111
d__Eukaryota	k__Fungi	p__Ascomycota	c__Leotiomycetes	o__Helotiales	f__Rutstroemiaceae	g__Lambertella	s__Lambertella_sp	OTU936	5	8.92602e-06	0.0555556
d__Eukaryota	k__Fungi	p__Basidiomycota	c__Agaricomycetes	o__Agaricales	f__unclassified_o__Agaricales	g__unclassified_o__Agaricales	s__unclassified_o__Agaricales	OTU1263	14	2.49929e-05	0.111111
d__Eukaryota	k__Fungi	p__Ascomycota	c__Dothideomycetes	o__Pleosporales	f__Phaeosphaeriaceae	g__Setophoma	s__Setophoma_sp	OTU1195	11	1.96372e-05	0.166667
d__Eukaryota	k__Fungi	p__Ascomycota	c__Sordariomycetes	o__unclassified_c__Sordariomycetes	f__unclassified_c__Sordariomycetes	g__unclassified_c__Sordariomycetes	s__unclassified_c__Sordariomycetes	OTU1201	34	6.06969e-05	0.0555556
d__Eukaryota	k__Fungi	p__Ascomycota	c__Dothideomycetes	o__Capnodiales	f__Mycosphaerellaceae	g__unclassified_f__Mycosphaerellaceae	s__unclassified_f__Mycosphaerellaceae	OTU1496	535	0.000955084	0.166667
d__Eukaryota	k__Fungi	p__Ascomycota	c__Eurotiomycetes	o__Chaetothyriales	f__unclassified_o__Chaetothyriales	g__unclassified_o__Chaetothyriales	s__unclassified_o__Chaetothyriales	OTU1186	4	7.14082e-06	0.111111
d__Eukaryota	k__Fungi	p__Ascomycota	c__Dothideomycetes	o__Pleosporales	f__Torulaceae	g__Dendryphion	s__Dendryphion_sp	OTU1284	23	4.10597e-05	0.111111
d__Eukaryota	k__Fungi	p__Ascomycota	c__Eurotiomycetes	o__Chaetothyriales	f__Cyphellophoraceae	g__Cyphellophora	s__Cyphellophora_eucalypti	OTU118	357	0.000637318	0.166667
d__Eukaryota	k__Fungi	p__Ascomycota	c__Sordariomycetes	o__unclassified_c__Sordariomycetes	f__unclassified_c__Sordariomycetes	g__unclassified_c__Sordariomycetes	s__unclassified_c__Sordariomycetes	OTU966	27	4.82005e-05	0.166667
d__Eukaryota	k__Fungi	p__Ascomycota	c__Sordariomycetes	o__unclassified_c__Sordariomycetes	f__unclassified_c__Sordariomycetes	g__unclassified_c__Sordariomycetes	s__unclassified_c__Sordariomycetes	OTU789	1	1.7852e-06	0.0555556
d__Eukaryota	k__Fungi	p__Ascomycota	c__Sordariomycetes	o__unclassified_c__Sordariomycetes	f__unclassified_c__Sordariomycetes	g__unclassified_c__Sordariomycetes	s__unclassified_c__Sordariomycetes	OTU1332	5	8.92602e-06	0.0555556
d__Eukaryota	k__Fungi	p__Ascomycota	c__Sordariomycetes	o__Xylariales	f__Xylariaceae	g__Hypoxylon	s__Hypoxylon_trugodes	OTU2051	22	3.92745e-05	0.222222
d__Eukaryota	k__Fungi	p__Ascomycota	c__Eurotiomycetes	o__Chaetothyriales	f__Chaetothyriales_fam_Incertae_sedis	g__Strelitziana	s__Strelitziana_malaysiana	OTU1327	6	1.07112e-05	0.111111
d__Eukaryota	k__Fungi	p__Ascomycota	c__Sordariomycetes	o__Hypocreales	f__Nectriaceae	g__Xenoacremonium	s__Xenoacremonium_recifei	OTU1296	6	1.07112e-05	0.111111
d__Eukaryota	k__Fungi	p__Ascomycota	c__Dothideomycetes	o__Pleosporales	f__Didymosphaeriaceae	g__Letendraea	s__Letendraea_cordylinicola	OTU620	11	1.96372e-05	0.0555556
d__Eukaryota	k__Fungi	p__Ascomycota	c__Sordariomycetes	o__Xylariales	f__Xylariaceae	g__Hypoxylon	s__Hypoxylon_pilgerianum	OTU1287	5	8.92602e-06	0.0555556
d__Eukaryota	k__Fungi	p__Basidiomycota	c__Tremellomycetes	o__Trichosporonales	f__Trichosporonaceae	g__Cutaneotrichosporon	s__Cutaneotrichosporon_guehoae	OTU895	2337	0.00417202	0.5
d__Eukaryota	k__Fungi	p__unclassified_k__Fungi	c__unclassified_k__Fungi	o__unclassified_k__Fungi	f__unclassified_k__Fungi	g__unclassified_k__Fungi	s__unclassified_k__Fungi	OTU772	26	4.64153e-05	0.388889
d__Eukaryota	k__Fungi	p__Ascomycota	c__Sordariomycetes	o__Diaporthales	f__unclassified_o__Diaporthales	g__unclassified_o__Diaporthales	s__unclassified_o__Diaporthales	OTU798	2	3.57041e-06	0.0555556
d__Eukaryota	k__Fungi	p__Ascomycota	c__Sordariomycetes	o__Trichosphaeriales	f__Trichosphaeriaceae	g__Nigrospora	s__Nigrospora_oryzae	OTU2052	674	0.00120323	0.555556
d__Eukaryota	k__Fungi	p__unclassified_k__Fungi	c__unclassified_k__Fungi	o__unclassified_k__Fungi	f__unclassified_k__Fungi	g__unclassified_k__Fungi	s__unclassified_k__Fungi	OTU707	18	3.21337e-05	0.0555556
d__Eukaryota	k__Fungi	p__Ascomycota	c__Eurotiomycetes	o__Chaetothyriales	f__Trichomeriaceae	g__unclassified_f__Trichomeriaceae	s__Trichomeriaceae_sp	OTU915	22	3.92745e-05	0.0555556
d__Eukaryota	k__Fungi	p__Ascomycota	c__Saccharomycetes	o__Saccharomycetales	f__Saccharomycetales_fam_Incertae_sedis	g__Candida	s__Candida_tropicalis	OTU899	113	0.000201728	0.277778
d__Eukaryota	k__Fungi	p__Ascomycota	c__Dothideomycetes	o__Pleosporales	f__Thyridariaceae	g__unclassified_f__Thyridariaceae	s__unclassified_f__Thyridariaceae	OTU972	1	1.7852e-06	0.0555556
d__Eukaryota	k__Fungi	p__Basidiomycota	c__Microbotryomycetes	o__Sporidiobolales	f__Sporidiobolaceae	g__Rhodotorula	s__Rhodotorula_mucilaginosa	OTU629	217	0.000387389	0.111111
d__Eukaryota	k__Fungi	p__Basidiomycota	c__Agaricomycetes	o__Cantharellales	f__Cantharellales_fam_Incertae_sedis	g__Minimedusa	s__Minimedusa_polyspora	OTU1108	21	3.74893e-05	0.0555556
d__Eukaryota	k__Fungi	p__Ascomycota	c__Sordariomycetes	o__Hypocreales	f__Hypocreales_fam_Incertae_sedis	g__Sarocladium	s__Sarocladium_strictum	OTU1059	3	5.35561e-06	0.166667
d__Eukaryota	k__Fungi	p__Ascomycota	c__Sordariomycetes	o__Microascales	f__Microascaceae	g__Pithoascus	s__Pithoascus_sp	OTU670	9	1.60668e-05	0.0555556
d__Eukaryota	k__Fungi	p__Basidiomycota	c__Tremellomycetes	o__Tremellales	f__Tremellaceae	g__Cryptococcus_f__Tremellaceae	s__Cryptococcus_dimennae	OTU1407	2	3.57041e-06	0.0555556
d__Eukaryota	k__Fungi	p__Basidiomycota	c__Agaricomycetes	o__unclassified_c__Agaricomycetes	f__unclassified_c__Agaricomycetes	g__unclassified_c__Agaricomycetes	s__unclassified_c__Agaricomycetes	OTU1039	32	5.71265e-05	0.0555556
d__Eukaryota	k__Fungi	p__Basidiomycota	c__Agaricomycetes	o__Agaricales	f__Bolbitiaceae	g__Agrocybe	s__Agrocybe_praecox	OTU975	1	1.7852e-06	0.0555556
d__Eukaryota	k__Fungi	p__Basidiomycota	c__Agaricomycetes	o__unclassified_c__Agaricomycetes	f__unclassified_c__Agaricomycetes	g__unclassified_c__Agaricomycetes	s__unclassified_c__Agaricomycetes	OTU1036	84	0.000149957	0.111111
d__Eukaryota	k__Fungi	p__Ascomycota	c__Dothideomycetes	o__Pleosporales	f__Massarinaceae	g__unclassified_f__Massarinaceae	s__unclassified_f__Massarinaceae	OTU739	44	7.8549e-05	0.0555556
d__Eukaryota	k__Fungi	p__Ascomycota	c__Eurotiomycetes	o__Chaetothyriales	f__Trichomeriaceae	g__Trichomerium	s__unclassified_g__Trichomerium	OTU1223	19	3.39189e-05	0.0555556
d__Eukaryota	k__Fungi	p__Ascomycota	c__Sordariomycetes	o__Xylariales	f__Xylariaceae	g__Rosellinia	s__Rosellinia_subiculata	OTU1352	15	2.67781e-05	0.0555556
d__Eukaryota	k__Fungi	p__Basidiomycota	c__Agaricomycetes	o__Agaricales	f__Entolomataceae	g__Entoloma	s__unclassified_g__Entoloma	OTU759	323	0.000576621	0.111111
d__Eukaryota	k__Fungi	p__Ascomycota	c__Sordariomycetes	o__Hypocreales	f__Nectriaceae	g__unclassified_f__Nectriaceae	s__unclassified_f__Nectriaceae	OTU1382	6	1.07112e-05	0.0555556
d__Eukaryota	k__Fungi	p__Ascomycota	c__Dothideomycetes	o__Pleosporales	f__Torulaceae	g__Torula	s__Torula_herbarum	OTU2012	9	1.60668e-05	0.0555556
d__Eukaryota	k__Fungi	p__Basidiomycota	c__Agaricomycetes	o__Agaricales	f__Entolomataceae	g__Entoloma	s__unclassified_g__Entoloma	OTU599	4	7.14082e-06	0.0555556
d__Eukaryota	k__Fungi	p__Ascomycota	c__unclassified_p__Ascomycota	o__unclassified_p__Ascomycota	f__unclassified_p__Ascomycota	g__unclassified_p__Ascomycota	s__unclassified_p__Ascomycota	OTU1158	4	7.14082e-06	0.0555556
d__Eukaryota	k__Fungi	p__Ascomycota	c__Leotiomycetes	o__Rhytismatales	f__Rhytismataceae	g__Leptostroma	s__Leptostroma_sp	OTU621	107	0.000191017	0.222222
d__Eukaryota	k__Fungi	p__Ascomycota	c__Sordariomycetes	o__Sordariales	f__Chaetomiaceae	g__unclassified_f__Chaetomiaceae	s__unclassified_f__Chaetomiaceae	OTU696	4025	0.00718545	0.166667
d__Eukaryota	k__Fungi	p__Ascomycota	c__unclassified_p__Ascomycota	o__unclassified_p__Ascomycota	f__unclassified_p__Ascomycota	g__unclassified_p__Ascomycota	s__unclassified_p__Ascomycota	OTU1480	7	1.24964e-05	0.111111
d__Eukaryota	k__Fungi	p__Ascomycota	c__Eurotiomycetes	o__Eurotiales	f__Aspergillaceae	g__Penicillium	s__Penicillium_parviverrucosum	OTU1337	5	8.92602e-06	0.0555556
d__Eukaryota	k__Fungi	p__Ascomycota	c__Sordariomycetes	o__Hypocreales	f__Clavicipitaceae	g__Metarhizium	s__unclassified_g__Metarhizium	OTU918	70	0.000124964	0.0555556
d__Eukaryota	k__Fungi	p__Ascomycota	c__Sordariomycetes	o__Xylariales	f__Sporocadaceae	g__unclassified_f__Sporocadaceae	s__unclassified_f__Sporocadaceae	OTU130	1	1.7852e-06	0.0555556
d__Eukaryota	k__Fungi	p__Basidiomycota	c__Cystobasidiomycetes	o__Cystobasidiales	f__Cystobasidiaceae	g__unclassified_f__Cystobasidiaceae	s__unclassified_f__Cystobasidiaceae	OTU732	25	4.46301e-05	0.0555556
d__Eukaryota	k__Fungi	p__Basidiomycota	c__Tremellomycetes	o__Tremellales	f__unclassified_o__Tremellales	g__unclassified_o__Tremellales	s__unclassified_o__Tremellales	OTU642	587	0.00104791	0.277778
d__Eukaryota	k__Fungi	p__Ascomycota	c__Sordariomycetes	o__Hypocreales	f__Nectriaceae	g__unclassified_f__Nectriaceae	s__unclassified_f__Nectriaceae	OTU909	73	0.00013032	0.0555556
d__Eukaryota	k__Fungi	p__Ascomycota	c__Sordariomycetes	o__unclassified_c__Sordariomycetes	f__unclassified_c__Sordariomycetes	g__unclassified_c__Sordariomycetes	s__unclassified_c__Sordariomycetes	OTU579	156	0.000278492	0.277778
d__Eukaryota	k__Fungi	p__Ascomycota	c__Sordariomycetes	o__Diaporthales	f__Diaporthaceae	g__Diaporthe	s__unclassified_g__Diaporthe	OTU1170	2	3.57041e-06	0.0555556
d__Eukaryota	k__Fungi	p__Ascomycota	c__Dothideomycetes	o__Venturiales	f__Sympoventuriaceae	g__Neocoleroa	s__Neocoleroa_metrosideri	OTU1398	166	0.000296344	0.111111
d__Eukaryota	k__Fungi	p__Ascomycota	c__Sordariomycetes	o__Hypocreales	f__Hypocreales_fam_Incertae_sedis	g__Acremonium	s__Acremonium_charticola	OTU1514	50	8.92602e-05	0.166667
d__Eukaryota	k__Fungi	p__Ascomycota	c__Eurotiomycetes	o__Chaetothyriales	f__Cyphellophoraceae	g__Cyphellophora	s__Cyphellophora_laciniata	OTU991	20	3.57041e-05	0.166667
d__Eukaryota	k__Fungi	p__Ascomycota	c__Sordariomycetes	o__Xylariales	f__Amphisphaeriaceae	g__Amphisphaeria	s__unclassified_g__Amphisphaeria	OTU957	15	2.67781e-05	0.111111
d__Eukaryota	k__Fungi	p__Ascomycota	c__Sordariomycetes	o__Diaporthales	f__Gnomoniaceae	g__Ophiognomonia	s__Ophiognomonia_apiospora	OTU978	6	1.07112e-05	0.0555556
d__Eukaryota	k__Fungi	p__unclassified_k__Fungi	c__unclassified_k__Fungi	o__unclassified_k__Fungi	f__unclassified_k__Fungi	g__unclassified_k__Fungi	s__unclassified_k__Fungi	OTU747	9	1.60668e-05	0.0555556
d__Eukaryota	k__Fungi	p__Ascomycota	c__Dothideomycetes	o__Capnodiales	f__unclassified_o__Capnodiales	g__unclassified_o__Capnodiales	s__unclassified_o__Capnodiales	OTU1218	2	3.57041e-06	0.0555556
d__Eukaryota	k__Fungi	p__Basidiomycota	c__Agaricomycetes	o__Geastrales	f__Geastraceae	g__Geastrum	s__Geastrum_sp	OTU1042	1	1.7852e-06	0.0555556
d__Eukaryota	k__Fungi	p__unclassified_k__Fungi	c__unclassified_k__Fungi	o__unclassified_k__Fungi	f__unclassified_k__Fungi	g__unclassified_k__Fungi	s__unclassified_k__Fungi	OTU1141	2	3.57041e-06	0.0555556
d__Eukaryota	k__Fungi	p__Ascomycota	c__Dothideomycetes	o__Botryosphaeriales	f__Botryosphaeriaceae	g__Microdiplodia	s__Microdiplodia_miyakei	OTU2027	34	6.06969e-05	0.222222
d__Eukaryota	k__Fungi	p__unclassified_k__Fungi	c__unclassified_k__Fungi	o__unclassified_k__Fungi	f__unclassified_k__Fungi	g__unclassified_k__Fungi	s__unclassified_k__Fungi	OTU698	2	3.57041e-06	0.111111
d__Eukaryota	k__Fungi	p__unclassified_k__Fungi	c__unclassified_k__Fungi	o__unclassified_k__Fungi	f__unclassified_k__Fungi	g__unclassified_k__Fungi	s__unclassified_k__Fungi	OTU699	17	3.03485e-05	0.0555556
d__Eukaryota	k__Fungi	p__unclassified_k__Fungi	c__unclassified_k__Fungi	o__unclassified_k__Fungi	f__unclassified_k__Fungi	g__unclassified_k__Fungi	s__unclassified_k__Fungi	OTU694	2	3.57041e-06	0.0555556
d__Eukaryota	k__Fungi	p__unclassified_k__Fungi	c__unclassified_k__Fungi	o__unclassified_k__Fungi	f__unclassified_k__Fungi	g__unclassified_k__Fungi	s__unclassified_k__Fungi	OTU692	123	0.00021958	0.111111
d__Eukaryota	k__Fungi	p__Basidiomycota	c__Agaricomycetes	o__Thelephorales	f__Thelephoraceae	g__Tomentella	s__Tomentella_sp	OTU1236	4	7.14082e-06	0.0555556
d__Eukaryota	k__Fungi	p__Basidiomycota	c__Tremellomycetes	o__Cystofilobasidiales	f__Mrakiaceae	g__Tausonia	s__Tausonia_pullulans	OTU588	82	0.000146387	0.222222
d__Eukaryota	k__Fungi	p__unclassified_k__Fungi	c__unclassified_k__Fungi	o__unclassified_k__Fungi	f__unclassified_k__Fungi	g__unclassified_k__Fungi	s__unclassified_k__Fungi	OTU691	28	4.99857e-05	0.0555556
d__Eukaryota	k__Fungi	p__Ascomycota	c__Sordariomycetes	o__Xylariales	f__unclassified_o__Xylariales	g__unclassified_o__Xylariales	s__unclassified_o__Xylariales	OTU1589	1	1.7852e-06	0.0555556
d__Eukaryota	k__Fungi	p__Basidiomycota	c__Microbotryomycetes	o__Leucosporidiales	f__unclassified_o__Leucosporidiales	g__unclassified_o__Leucosporidiales	s__Leucosporidiales_sp	OTU744	28	4.99857e-05	0.0555556
d__Eukaryota	k__Fungi	p__Ascomycota	c__Eurotiomycetes	o__Chaetothyriales	f__Cyphellophoraceae	g__Cyphellophora	s__unclassified_g__Cyphellophora	OTU963	183	0.000326692	0.166667
d__Eukaryota	k__Fungi	p__Ascomycota	c__Eurotiomycetes	o__Chaetothyriales	f__Herpotrichiellaceae	g__Exophiala	s__unclassified_g__Exophiala	OTU52	12	2.14225e-05	0.166667
d__Eukaryota	k__Fungi	p__Basidiomycota	c__Malasseziomycetes	o__Malasseziales	f__Malasseziaceae	g__Malassezia	s__Malassezia_sp	OTU15	29	5.17709e-05	0.0555556
d__Eukaryota	k__Fungi	p__Ascomycota	c__Sordariomycetes	o__unclassified_c__Sordariomycetes	f__unclassified_c__Sordariomycetes	g__unclassified_c__Sordariomycetes	s__unclassified_c__Sordariomycetes	OTU1324	1	1.7852e-06	0.0555556
d__Eukaryota	k__Fungi	p__Ascomycota	c__Dothideomycetes	o__Pleosporales	f__Didymellaceae	g__unclassified_f__Didymellaceae	s__unclassified_f__Didymellaceae	OTU757	56	9.99714e-05	0.222222
d__Eukaryota	k__Fungi	p__Ascomycota	c__Sordariomycetes	o__Xylariales	f__Xylariaceae	g__Nemania	s__Nemania_pouzarii	OTU1348	6	1.07112e-05	0.0555556
d__Eukaryota	k__Fungi	p__Ascomycota	c__Sordariomycetes	o__Hypocreales	f__Hypocreales_fam_Incertae_sedis	g__Emericellopsis	s__Emericellopsis_terricola	OTU659	244	0.00043559	0.277778
d__Eukaryota	k__Fungi	p__Ascomycota	c__Sordariomycetes	o__Xylariales	f__Xylariaceae	g__Xylaria	s__Xylaria_escharoidea	OTU2004	6	1.07112e-05	0.166667
d__Eukaryota	k__Fungi	p__Ascomycota	c__Sordariomycetes	o__Sordariales	f__unclassified_o__Sordariales	g__unclassified_o__Sordariales	s__unclassified_o__Sordariales	OTU556	24	4.28449e-05	0.0555556
d__Eukaryota	k__Fungi	p__Ascomycota	c__Dothideomycetes	o__Pleosporales	f__Pleosporaceae	g__Alternaria	s__unclassified_g__Alternaria	OTU1503	507	0.000905099	0.666667
d__Eukaryota	k__Fungi	p__Basidiomycota	c__Agaricomycetes	o__Cantharellales	f__Ceratobasidiaceae	g__Ceratobasidium	s__Ceratobasidium_sp	OTU1354	12	2.14225e-05	0.111111
d__Eukaryota	k__Fungi	p__Ascomycota	c__Sordariomycetes	o__unclassified_c__Sordariomycetes	f__unclassified_c__Sordariomycetes	g__unclassified_c__Sordariomycetes	s__unclassified_c__Sordariomycetes	OTU809	7	1.24964e-05	0.166667
d__Eukaryota	k__Fungi	p__Ascomycota	c__Sordariomycetes	o__Xylariales	f__Xylariaceae	g__unclassified_f__Xylariaceae	s__unclassified_f__Xylariaceae	OTU1303	1	1.7852e-06	0.0555556
d__Eukaryota	k__Fungi	p__Ascomycota	c__Dothideomycetes	o__Pleosporales	f__Lophiotremataceae	g__Lophiotrema	s__Lophiotrema_rubi	OTU1393	5	8.92602e-06	0.0555556
d__Eukaryota	k__Fungi	p__Ascomycota	c__Sordariomycetes	o__Hypocreales	f__Stachybotryaceae	g__Myxospora	s__unclassified_g__Myxospora	OTU1462	1	1.7852e-06	0.0555556
d__Eukaryota	k__Fungi	p__Basidiomycota	c__Tremellomycetes	o__Tremellales	f__Bulleribasidiaceae	g__Vishniacozyma	s__Vishniacozyma_dimennae	OTU528	4	7.14082e-06	0.0555556
d__Eukaryota	k__Fungi	p__Ascomycota	c__Sordariomycetes	o__Diaporthales	f__Diaporthaceae	g__Diaporthe	s__unclassified_g__Diaporthe	OTU1249	13	2.32077e-05	0.111111
d__Eukaryota	k__Fungi	p__Chytridiomycota	c__unclassified_p__Chytridiomycota	o__unclassified_p__Chytridiomycota	f__unclassified_p__Chytridiomycota	g__unclassified_p__Chytridiomycota	s__unclassified_p__Chytridiomycota	OTU609	3	5.35561e-06	0.111111
d__Eukaryota	k__Fungi	p__Ascomycota	c__Dothideomycetes	o__Venturiales	f__Sympoventuriaceae	g__Scolecobasidium	s__Scolecobasidium_constrictum	OTU1019	2	3.57041e-06	0.0555556
d__Eukaryota	k__Fungi	p__Basidiomycota	c__unclassified_p__Basidiomycota	o__unclassified_p__Basidiomycota	f__unclassified_p__Basidiomycota	g__unclassified_p__Basidiomycota	s__unclassified_p__Basidiomycota	OTU1252	8	1.42816e-05	0.0555556
d__Eukaryota	k__Fungi	p__Ascomycota	c__Sordariomycetes	o__Sordariales	f__Helminthosphaeriaceae	g__Endophragmiella	s__Endophragmiella_constricta	OTU842	5	8.92602e-06	0.111111
d__Eukaryota	k__Fungi	p__Ascomycota	c__Sordariomycetes	o__Hypocreales	f__Hypocreales_fam_Incertae_sedis	g__Xylochrysis	s__Xylochrysis_lucida	OTU1285	5	8.92602e-06	0.0555556
d__Eukaryota	k__Fungi	p__unclassified_k__Fungi	c__unclassified_k__Fungi	o__unclassified_k__Fungi	f__unclassified_k__Fungi	g__unclassified_k__Fungi	s__unclassified_k__Fungi	OTU1400	2	3.57041e-06	0.0555556
d__Eukaryota	k__Fungi	p__Ascomycota	c__unclassified_p__Ascomycota	o__unclassified_p__Ascomycota	f__unclassified_p__Ascomycota	g__unclassified_p__Ascomycota	s__unclassified_p__Ascomycota	OTU1053	7	1.24964e-05	0.0555556
d__Eukaryota	k__Fungi	p__Basidiomycota	c__Agaricomycetes	o__Thelephorales	f__Thelephoraceae	g__unclassified_f__Thelephoraceae	s__Thelephoraceae_sp	OTU1375	7	1.24964e-05	0.111111
d__Eukaryota	k__Fungi	p__Ascomycota	c__Sordariomycetes	o__Hypocreales	f__unclassified_o__Hypocreales	g__unclassified_o__Hypocreales	s__unclassified_o__Hypocreales	OTU1399	155	0.000276707	0.0555556
d__Eukaryota	k__Fungi	p__Ascomycota	c__Eurotiomycetes	o__Chaetothyriales	f__Herpotrichiellaceae	g__Exophiala	s__unclassified_g__Exophiala	OTU1109	6	1.07112e-05	0.0555556
d__Eukaryota	k__Fungi	p__Basidiomycota	c__Agaricomycetes	o__Agaricales	f__Psathyrellaceae	g__Coprinellus	s__Coprinellus_heterothrix	OTU117	17	3.03485e-05	0.111111
d__Eukaryota	k__Fungi	p__Ascomycota	c__Sordariomycetes	o__unclassified_c__Sordariomycetes	f__unclassified_c__Sordariomycetes	g__unclassified_c__Sordariomycetes	s__unclassified_c__Sordariomycetes	OTU618	36	6.42674e-05	0.0555556
d__Eukaryota	k__Fungi	p__Ascomycota	c__unclassified_p__Ascomycota	o__unclassified_p__Ascomycota	f__unclassified_p__Ascomycota	g__unclassified_p__Ascomycota	s__unclassified_p__Ascomycota	OTU1239	6	1.07112e-05	0.0555556
d__Eukaryota	k__Fungi	p__Ascomycota	c__Sordariomycetes	o__Glomerellales	f__Plectosphaerellaceae	g__Gibellulopsis	s__Gibellulopsis_nigrescens	OTU560	308	0.000549843	0.333333
d__Eukaryota	k__Fungi	p__Ascomycota	c__Sordariomycetes	o__Xylariales	f__Amphisphaeriaceae	g__Amphisphaeria	s__unclassified_g__Amphisphaeria	OTU1651	1	1.7852e-06	0.0555556
d__Eukaryota	k__Fungi	p__Basidiomycota	c__Agaricomycetes	o__Thelephorales	f__Thelephoraceae	g__unclassified_f__Thelephoraceae	s__Thelephoraceae_sp	OTU379	2	3.57041e-06	0.0555556
d__Eukaryota	k__Fungi	p__Basidiomycota	c__Agaricomycetes	o__Agaricales	f__Strophariaceae	g__Psilocybe	s__Psilocybe_definita	OTU740	19	3.39189e-05	0.111111
d__Eukaryota	k__Fungi	p__Ascomycota	c__Dothideomycetes	o__Pleosporales	f__Thyridariaceae	g__Roussoella	s__Roussoella_sp	OTU485	2	3.57041e-06	0.111111
d__Eukaryota	k__Fungi	p__Ascomycota	c__Dothideomycetes	o__Pleosporales	f__Pleosporales_fam_Incertae_sedis	g__Astrosphaeriella	s__Astrosphaeriella_bakeriana	OTU547	31	5.53413e-05	0.0555556
d__Eukaryota	k__Fungi	p__Ascomycota	c__unclassified_p__Ascomycota	o__unclassified_p__Ascomycota	f__unclassified_p__Ascomycota	g__unclassified_p__Ascomycota	s__unclassified_p__Ascomycota	OTU460	3	5.35561e-06	0.0555556
d__Eukaryota	k__Fungi	p__Ascomycota	c__Sordariomycetes	o__Sordariales	f__Sordariaceae	g__Gelasinospora	s__unclassified_g__Gelasinospora	OTU285	101	0.000180306	0.111111
d__Eukaryota	k__Fungi	p__Ascomycota	c__Sordariomycetes	o__Hypocreales	f__Hypocreaceae	g__Trichoderma	s__unclassified_g__Trichoderma	OTU248	6	1.07112e-05	0.111111
d__Eukaryota	k__Fungi	p__Ascomycota	c__Sordariomycetes	o__Diaporthales	f__Diaporthaceae	g__Diaporthe	s__unclassified_g__Diaporthe	OTU1190	409	0.000730149	0.277778
d__Eukaryota	k__Fungi	p__Ascomycota	c__Sordariomycetes	o__Hypocreales	f__Stachybotryaceae	g__Albifimbria	s__Albifimbria_verrucaria	OTU2119	9	1.60668e-05	0.0555556
d__Eukaryota	k__Fungi	p__Ascomycota	c__Dothideomycetes	o__Pleosporales	f__Phaeosphaeriaceae	g__Setophoma	s__Setophoma_sp	OTU1220	32	5.71265e-05	0.222222
d__Eukaryota	k__Fungi	p__Ascomycota	c__unclassified_p__Ascomycota	o__unclassified_p__Ascomycota	f__unclassified_p__Ascomycota	g__unclassified_p__Ascomycota	s__unclassified_p__Ascomycota	OTU979	108	0.000192802	0.166667
d__Eukaryota	k__Fungi	p__Rozellomycota	c__unclassified_p__Rozellomycota	o__unclassified_p__Rozellomycota	f__unclassified_p__Rozellomycota	g__unclassified_p__Rozellomycota	s__Rozellomycota_sp	OTU711	12	2.14225e-05	0.0555556
d__Eukaryota	k__Fungi	p__Ascomycota	c__Eurotiomycetes	o__Chaetothyriales	f__Chaetothyriales_fam_Incertae_sedis	g__Strelitziana	s__Strelitziana_africana	OTU1458	5	8.92602e-06	0.0555556
d__Eukaryota	k__Fungi	p__Ascomycota	c__Sordariomycetes	o__Xylariales	f__Diatrypaceae	g__Peroneutypa	s__Peroneutypa_scoparia	OTU724	2	3.57041e-06	0.0555556
d__Eukaryota	k__Fungi	p__Ascomycota	c__Eurotiomycetes	o__Chaetothyriales	f__Chaetothyriales_fam_Incertae_sedis	g__Strelitziana	s__unclassified_g__Strelitziana	OTU1205	18	3.21337e-05	0.0555556
d__Eukaryota	k__Fungi	p__Ascomycota	c__Dothideomycetes	o__Pleosporales	f__Periconiaceae	g__Periconia	s__Periconia_elaeidis	OTU2123	1	1.7852e-06	0.0555556
d__Eukaryota	k__Fungi	p__Ascomycota	c__Saccharomycetes	o__Saccharomycetales	f__Saccharomycetaceae	g__Eremothecium	s__Eremothecium_coryli	OTU837	8	1.42816e-05	0.0555556
d__Eukaryota	k__Fungi	p__Ascomycota	c__Dothideomycetes	o__Pleosporales	f__Pleosporaceae	g__Alternaria	s__Alternaria_longissima	OTU2076	152	0.000271351	0.166667
d__Eukaryota	k__Fungi	p__Ascomycota	c__Sordariomycetes	o__Glomerellales	f__unclassified_o__Glomerellales	g__unclassified_o__Glomerellales	s__unclassified_o__Glomerellales	OTU554	10	1.7852e-05	0.277778
d__Eukaryota	k__Fungi	p__Ascomycota	c__Orbiliomycetes	o__Orbiliales	f__Orbiliaceae	g__unclassified_f__Orbiliaceae	s__unclassified_f__Orbiliaceae	OTU1202	3	5.35561e-06	0.0555556
d__Eukaryota	k__Fungi	p__Ascomycota	c__Sordariomycetes	o__Diaporthales	f__Diaporthaceae	g__Diaporthe	s__unclassified_g__Diaporthe	OTU607	78	0.000139246	0.444444
d__Eukaryota	k__Fungi	p__Ascomycota	c__Dothideomycetes	o__Capnodiales	f__Teratosphaeriaceae	g__unclassified_f__Teratosphaeriaceae	s__unclassified_f__Teratosphaeriaceae	OTU1333	9	1.60668e-05	0.0555556
d__Eukaryota	k__Fungi	p__Ascomycota	c__Dothideomycetes	o__Pleosporales	f__Phaeosphaeriaceae	g__Paraphoma	s__Paraphoma_radicina	OTU1557	1803	0.00321872	0.111111
d__Eukaryota	k__Fungi	p__Basidiomycota	c__Microbotryomycetes	o__Microbotryomycetes_ord_Incertae_sedis	f__Chrysozymaceae	g__Pseudohyphozyma	s__Pseudohyphozyma_bogoriensis	OTU912	1383	0.00246894	0.333333
d__Eukaryota	k__Fungi	p__Basidiomycota	c__Microbotryomycetes	o__Microbotryomycetes_ord_Incertae_sedis	f__Chrysozymaceae	g__Pseudohyphozyma	s__Pseudohyphozyma_bogoriensis	OTU910	16	2.85633e-05	0.0555556
d__Eukaryota	k__Fungi	p__Ascomycota	c__Saccharomycetes	o__Saccharomycetales	f__Pichiaceae	g__Pichia	s__unclassified_g__Pichia	OTU787	2	3.57041e-06	0.0555556
d__Eukaryota	k__Fungi	p__Ascomycota	c__Sordariomycetes	o__Glomerellales	f__Glomerellaceae	g__Colletotrichum	s__unclassified_g__Colletotrichum	OTU960	50	8.92602e-05	0.166667
d__Eukaryota	k__Fungi	p__Basidiomycota	c__unclassified_p__Basidiomycota	o__unclassified_p__Basidiomycota	f__unclassified_p__Basidiomycota	g__unclassified_p__Basidiomycota	s__unclassified_p__Basidiomycota	OTU454	3	5.35561e-06	0.0555556
d__Eukaryota	k__Fungi	p__Ascomycota	c__Sordariomycetes	o__unclassified_c__Sordariomycetes	f__unclassified_c__Sordariomycetes	g__unclassified_c__Sordariomycetes	s__unclassified_c__Sordariomycetes	OTU846	4	7.14082e-06	0.0555556
d__Eukaryota	k__Fungi	p__Basidiomycota	c__Agaricomycetes	o__Polyporales	f__Ganodermataceae	g__Ganoderma	s__Ganoderma_sp	OTU1207	4	7.14082e-06	0.0555556
d__Eukaryota	k__Fungi	p__Ascomycota	c__Sordariomycetes	o__Hypocreales	f__Hypocreales_fam_Incertae_sedis	g__Acremonium	s__Acremonium_polychromum	OTU1100	6	1.07112e-05	0.0555556
d__Eukaryota	k__Fungi	p__Ascomycota	c__Sordariomycetes	o__Xylariales	f__Xylariaceae	g__Hypoxylon	s__Hypoxylon_fendleri	OTU1208	3	5.35561e-06	0.0555556
d__Eukaryota	k__Fungi	p__Ascomycota	c__Eurotiomycetes	o__Eurotiales	f__Trichocomaceae	g__Talaromyces	s__unclassified_g__Talaromyces	OTU1349	5	8.92602e-06	0.0555556
d__Eukaryota	k__Fungi	p__Ascomycota	c__unclassified_p__Ascomycota	o__unclassified_p__Ascomycota	f__unclassified_p__Ascomycota	g__unclassified_p__Ascomycota	s__unclassified_p__Ascomycota	OTU980	1	1.7852e-06	0.0555556
d__Eukaryota	k__Fungi	p__Ascomycota	c__Leotiomycetes	o__Helotiales	f__Helotiaceae	g__Articulospora	s__Articulospora_sp	OTU50	26	4.64153e-05	0.166667
d__Eukaryota	k__Fungi	p__Basidiomycota	c__Tremellomycetes	o__Filobasidiales	f__Filobasidiaceae	g__Filobasidium	s__Filobasidium_oeirense	OTU1153	2	3.57041e-06	0.0555556
d__Eukaryota	k__Fungi	p__Ascomycota	c__Dothideomycetes	o__Pleosporales	f__Didymellaceae	g__Boeremia	s__Boeremia_exigua	OTU386	80	0.000142816	0.333333
d__Eukaryota	k__Fungi	p__Basidiomycota	c__Tremellomycetes	o__Tremellales	f__Tremellaceae	g__Cryptococcus_f__Tremellaceae	s__Cryptococcus_dimennae	OTU398	3	5.35561e-06	0.0555556
d__Eukaryota	k__Fungi	p__unclassified_k__Fungi	c__unclassified_k__Fungi	o__unclassified_k__Fungi	f__unclassified_k__Fungi	g__unclassified_k__Fungi	s__unclassified_k__Fungi	OTU750	4	7.14082e-06	0.0555556
d__Eukaryota	k__Fungi	p__Ascomycota	c__Dothideomycetes	o__Pleosporales	f__Phaeosphaeriaceae	g__Phaeosphaeriopsis	s__Phaeosphaeriopsis_sp	OTU2080	2	3.57041e-06	0.0555556
d__Eukaryota	k__Fungi	p__Ascomycota	c__Sordariomycetes	o__Diaporthales	f__Diaporthaceae	g__Diaporthe	s__unclassified_g__Diaporthe	OTU776	3	5.35561e-06	0.0555556
d__Eukaryota	k__Fungi	p__Ascomycota	c__Sordariomycetes	o__Diaporthales	f__Diaporthaceae	g__Diaporthe	s__unclassified_g__Diaporthe	OTU775	33	5.89117e-05	0.277778
d__Eukaryota	k__Fungi	p__Ascomycota	c__Sordariomycetes	o__Diaporthales	f__Diaporthaceae	g__Diaporthe	s__unclassified_g__Diaporthe	OTU779	6	1.07112e-05	0.0555556
d__Eukaryota	k__Fungi	p__Ascomycota	c__Dothideomycetes	o__Pleosporales	f__Massarinaceae	g__Helminthosporium	s__Helminthosporium_velutinum	OTU628	559	0.000997929	0.333333
d__Eukaryota	k__Fungi	p__Ascomycota	c__Dothideomycetes	o__Pleosporales	f__Phaeosphaeriaceae	g__Setophaeosphaeria	s__Setophaeosphaeria_citricola	OTU2009	96	0.00017138	0.0555556
d__Eukaryota	k__Fungi	p__Ascomycota	c__Dothideomycetes	o__Pleosporales	f__Didymosphaeriaceae	g__Montagnula	s__unclassified_g__Montagnula	OTU2156	2	3.57041e-06	0.0555556
d__Eukaryota	k__Fungi	p__Ascomycota	c__Eurotiomycetes	o__Chaetothyriales	f__Herpotrichiellaceae	g__Cladophialophora	s__unclassified_g__Cladophialophora	OTU1014	8	1.42816e-05	0.111111
d__Eukaryota	k__Fungi	p__Ascomycota	c__Eurotiomycetes	o__Eurotiales	f__Aspergillaceae	g__Penicillium	s__Penicillium_daejeonium	OTU1118	2	3.57041e-06	0.0555556
d__Eukaryota	k__Fungi	p__unclassified_k__Fungi	c__unclassified_k__Fungi	o__unclassified_k__Fungi	f__unclassified_k__Fungi	g__unclassified_k__Fungi	s__unclassified_k__Fungi	OTU615	338	0.000603399	0.388889
d__Eukaryota	k__Fungi	p__unclassified_k__Fungi	c__unclassified_k__Fungi	o__unclassified_k__Fungi	f__unclassified_k__Fungi	g__unclassified_k__Fungi	s__unclassified_k__Fungi	OTU612	2	3.57041e-06	0.0555556
d__Eukaryota	k__Fungi	p__Ascomycota	c__Sordariomycetes	o__Xylariales	f__Xylariaceae	g__unclassified_f__Xylariaceae	s__unclassified_f__Xylariaceae	OTU1986	2	3.57041e-06	0.0555556
d__Eukaryota	k__Fungi	p__Ascomycota	c__Sordariomycetes	o__Sordariales	f__Helminthosphaeriaceae	g__Endophragmiella	s__Endophragmiella_constricta	OTU1133	4	7.14082e-06	0.0555556
d__Eukaryota	k__Fungi	p__Basidiomycota	c__Agaricomycetes	o__Polyporales	f__Xenasmataceae	g__Xenasmatella	s__Xenasmatella_ardosiaca	OTU1085	1	1.7852e-06	0.0555556
d__Eukaryota	k__Fungi	p__Basidiomycota	c__unclassified_p__Basidiomycota	o__unclassified_p__Basidiomycota	f__unclassified_p__Basidiomycota	g__unclassified_p__Basidiomycota	s__unclassified_p__Basidiomycota	OTU146	86	0.000153528	0.0555556
d__Eukaryota	k__Fungi	p__Basidiomycota	c__Agaricomycetes	o__Agaricales	f__Strophariaceae	g__Deconica	s__Deconica_sp	OTU8	19	3.39189e-05	0.111111
d__Eukaryota	k__Fungi	p__Ascomycota	c__Sordariomycetes	o__Glomerellales	f__Plectosphaerellaceae	g__Lectera	s__unclassified_g__Lectera	OTU582	25	4.46301e-05	0.0555556
d__Eukaryota	k__Fungi	p__Basidiomycota	c__Wallemiomycetes	o__Wallemiales	f__Wallemiaceae	g__Wallemia	s__unclassified_g__Wallemia	OTU926	54	9.6401e-05	0.0555556
d__Eukaryota	k__Fungi	p__Ascomycota	c__Sordariomycetes	o__Xylariales	f__Xylariaceae	g__Hypoxylon	s__unclassified_g__Hypoxylon	OTU1125	4	7.14082e-06	0.111111
d__Eukaryota	k__Fungi	p__Basidiomycota	c__Agaricomycetes	o__Agaricales	f__Inocybaceae	g__Inocybe	s__Inocybe_virosa	OTU1764	1	1.7852e-06	0.0555556
d__Eukaryota	k__Fungi	p__Ascomycota	c__Dothideomycetes	o__Pleosporales	f__Lophiostomataceae	g__Biappendiculispora	s__Biappendiculispora_japonica	OTU1169	4	7.14082e-06	0.111111
d__Eukaryota	k__Fungi	p__Ascomycota	c__Sordariomycetes	o__Xylariales	f__unclassified_o__Xylariales	g__unclassified_o__Xylariales	s__unclassified_o__Xylariales	OTU1308	3	5.35561e-06	0.0555556
d__Eukaryota	k__Fungi	p__Ascomycota	c__Sordariomycetes	o__Xylariales	f__Xylariaceae	g__Xylaria	s__unclassified_g__Xylaria	OTU1754	2	3.57041e-06	0.111111
d__Eukaryota	k__Fungi	p__Ascomycota	c__Dothideomycetes	o__Capnodiales	f__Capnodiaceae	g__Scorias	s__Scorias_sp	OTU1262	14	2.49929e-05	0.0555556
d__Eukaryota	k__Fungi	p__Ascomycota	c__Sordariomycetes	o__Diaporthales	f__Diaporthaceae	g__Diaporthe	s__Diaporthe_melonis	OTU643	568	0.001014	0.333333
d__Eukaryota	k__Fungi	p__Ascomycota	c__Dothideomycetes	o__Venturiales	f__Sympoventuriaceae	g__Ochroconis	s__Ochroconis_sp	OTU327	1	1.7852e-06	0.0555556
d__Eukaryota	k__Fungi	p__unclassified_k__Fungi	c__unclassified_k__Fungi	o__unclassified_k__Fungi	f__unclassified_k__Fungi	g__unclassified_k__Fungi	s__unclassified_k__Fungi	OTU3	2	3.57041e-06	0.111111
d__Eukaryota	k__Fungi	p__Ascomycota	c__Sordariomycetes	o__Xylariales	f__unclassified_o__Xylariales	g__unclassified_o__Xylariales	s__unclassified_o__Xylariales	OTU82	26	4.64153e-05	0.222222
d__Eukaryota	k__Fungi	p__Ascomycota	c__Sordariomycetes	o__unclassified_c__Sordariomycetes	f__unclassified_c__Sordariomycetes	g__unclassified_c__Sordariomycetes	s__unclassified_c__Sordariomycetes	OTU1475	4	7.14082e-06	0.0555556
d__Eukaryota	k__Fungi	p__Ascomycota	c__Dothideomycetes	o__Pleosporales	f__Pleosporales_fam_Incertae_sedis	g__Dokmaia	s__Dokmaia_monthadangi	OTU1523	589	0.00105149	0.444444
d__Eukaryota	k__Fungi	p__Ascomycota	c__Sordariomycetes	o__Hypocreales	f__Hypocreales_fam_Incertae_sedis	g__Acremonium	s__Acremonium_curvulum	OTU1001	1	1.7852e-06	0.0555556
d__Eukaryota	k__Fungi	p__Ascomycota	c__Sordariomycetes	o__Diaporthales	f__Diaporthaceae	g__Diaporthe	s__unclassified_g__Diaporthe	OTU800	14	2.49929e-05	0.222222
d__Eukaryota	k__Fungi	p__Ascomycota	c__Sordariomycetes	o__Chaetosphaeriales	f__Chaetosphaeriaceae	g__unclassified_f__Chaetosphaeriaceae	s__unclassified_f__Chaetosphaeriaceae	OTU1081	8	1.42816e-05	0.0555556
d__Eukaryota	k__Fungi	p__Ascomycota	c__Eurotiomycetes	o__Eurotiales	f__Aspergillaceae	g__Penicillium	s__Penicillium_cordubense	OTU1546	5	8.92602e-06	0.111111
d__Eukaryota	k__Fungi	p__Glomeromycota	c__Glomeromycetes	o__Diversisporales	f__Diversisporales_fam_Incertae_sedis	g__Entrophospora	s__Entrophospora_sp	OTU1160	1181	0.00210833	0.111111
d__Eukaryota	k__Fungi	p__Ascomycota	c__Dothideomycetes	o__Pleosporales	f__Didymellaceae	g__Didymella	s__Didymella_rosea	OTU470	30	5.35561e-05	0.222222
d__Eukaryota	k__Fungi	p__Ascomycota	c__Sordariomycetes	o__Hypocreales	f__unclassified_o__Hypocreales	g__unclassified_o__Hypocreales	s__unclassified_o__Hypocreales	OTU1149	3	5.35561e-06	0.111111
d__Eukaryota	k__Fungi	p__Glomeromycota	c__Archaeosporomycetes	o__Archaeosporales	f__Archaeosporaceae	g__Archaeospora	s__Archaeospora_schenckii	OTU1385	6	1.07112e-05	0.0555556
d__Eukaryota	k__Fungi	p__Ascomycota	c__Sordariomycetes	o__Magnaporthales	f__Magnaporthaceae	g__Pyricularia	s__Pyricularia_parasitica	OTU1162	617	0.00110147	0.111111
d__Eukaryota	k__Fungi	p__Basidiomycota	c__Agaricomycetes	o__Agaricales	f__Bolbitiaceae	g__Panaeolus	s__unclassified_g__Panaeolus	OTU660	80	0.000142816	0.0555556
d__Eukaryota	k__Fungi	p__Ascomycota	c__unclassified_p__Ascomycota	o__unclassified_p__Ascomycota	f__unclassified_p__Ascomycota	g__unclassified_p__Ascomycota	s__unclassified_p__Ascomycota	OTU2026	4	7.14082e-06	0.0555556
d__Eukaryota	k__Fungi	p__Basidiomycota	c__Tremellomycetes	o__Tremellales	f__Rhynchogastremataceae	g__Papiliotrema	s__Papiliotrema_laurentii	OTU601	8144	0.0145387	0.611111
d__Eukaryota	k__Fungi	p__unclassified_k__Fungi	c__unclassified_k__Fungi	o__unclassified_k__Fungi	f__unclassified_k__Fungi	g__unclassified_k__Fungi	s__unclassified_k__Fungi	OTU689	41	7.31934e-05	0.0555556
d__Eukaryota	k__Fungi	p__unclassified_k__Fungi	c__unclassified_k__Fungi	o__unclassified_k__Fungi	f__unclassified_k__Fungi	g__unclassified_k__Fungi	s__unclassified_k__Fungi	OTU688	51	9.10454e-05	0.111111
d__Eukaryota	k__Fungi	p__Basidiomycota	c__Tremellomycetes	o__Cystofilobasidiales	f__Mrakiaceae	g__Tausonia	s__Tausonia_pullulans	OTU877	13	2.32077e-05	0.0555556
d__Eukaryota	k__Fungi	p__unclassified_k__Fungi	c__unclassified_k__Fungi	o__unclassified_k__Fungi	f__unclassified_k__Fungi	g__unclassified_k__Fungi	s__unclassified_k__Fungi	OTU685	10	1.7852e-05	0.0555556
d__Eukaryota	k__Fungi	p__unclassified_k__Fungi	c__unclassified_k__Fungi	o__unclassified_k__Fungi	f__unclassified_k__Fungi	g__unclassified_k__Fungi	s__unclassified_k__Fungi	OTU684	1	1.7852e-06	0.0555556
d__Eukaryota	k__Fungi	p__unclassified_k__Fungi	c__unclassified_k__Fungi	o__unclassified_k__Fungi	f__unclassified_k__Fungi	g__unclassified_k__Fungi	s__unclassified_k__Fungi	OTU687	82	0.000146387	0.111111
d__Eukaryota	k__Fungi	p__unclassified_k__Fungi	c__unclassified_k__Fungi	o__unclassified_k__Fungi	f__unclassified_k__Fungi	g__unclassified_k__Fungi	s__unclassified_k__Fungi	OTU686	24	4.28449e-05	0.111111
d__Eukaryota	k__Fungi	p__unclassified_k__Fungi	c__unclassified_k__Fungi	o__unclassified_k__Fungi	f__unclassified_k__Fungi	g__unclassified_k__Fungi	s__unclassified_k__Fungi	OTU681	27	4.82005e-05	0.0555556
d__Eukaryota	k__Fungi	p__unclassified_k__Fungi	c__unclassified_k__Fungi	o__unclassified_k__Fungi	f__unclassified_k__Fungi	g__unclassified_k__Fungi	s__unclassified_k__Fungi	OTU680	20	3.57041e-05	0.0555556
d__Eukaryota	k__Fungi	p__unclassified_k__Fungi	c__unclassified_k__Fungi	o__unclassified_k__Fungi	f__unclassified_k__Fungi	g__unclassified_k__Fungi	s__unclassified_k__Fungi	OTU683	10	1.7852e-05	0.0555556
d__Eukaryota	k__Fungi	p__unclassified_k__Fungi	c__unclassified_k__Fungi	o__unclassified_k__Fungi	f__unclassified_k__Fungi	g__unclassified_k__Fungi	s__unclassified_k__Fungi	OTU855	4	7.14082e-06	0.0555556
d__Eukaryota	k__Fungi	p__Ascomycota	c__Sordariomycetes	o__unclassified_c__Sordariomycetes	f__unclassified_c__Sordariomycetes	g__unclassified_c__Sordariomycetes	s__unclassified_c__Sordariomycetes	OTU1004	1	1.7852e-06	0.0555556
d__Eukaryota	k__Fungi	p__Basidiomycota	c__Tremellomycetes	o__Tremellales	f__unclassified_o__Tremellales	g__unclassified_o__Tremellales	s__unclassified_o__Tremellales	OTU1430	2	3.57041e-06	0.0555556
d__Eukaryota	k__Fungi	p__Ascomycota	c__Sordariomycetes	o__unclassified_c__Sordariomycetes	f__unclassified_c__Sordariomycetes	g__unclassified_c__Sordariomycetes	s__unclassified_c__Sordariomycetes	OTU1000	2	3.57041e-06	0.0555556
d__Eukaryota	k__Fungi	p__Ascomycota	c__Eurotiomycetes	o__Chaetothyriales	f__unclassified_o__Chaetothyriales	g__unclassified_o__Chaetothyriales	s__unclassified_o__Chaetothyriales	OTU1233	5	8.92602e-06	0.0555556
d__Eukaryota	k__Fungi	p__unclassified_k__Fungi	c__unclassified_k__Fungi	o__unclassified_k__Fungi	f__unclassified_k__Fungi	g__unclassified_k__Fungi	s__unclassified_k__Fungi	OTU1286	4	7.14082e-06	0.0555556
d__Eukaryota	k__Fungi	p__Ascomycota	c__Sordariomycetes	o__unclassified_c__Sordariomycetes	f__unclassified_c__Sordariomycetes	g__unclassified_c__Sordariomycetes	s__unclassified_c__Sordariomycetes	OTU584	11	1.96372e-05	0.0555556
d__Eukaryota	k__Fungi	p__Ascomycota	c__Dothideomycetes	o__Pleosporales	f__unclassified_o__Pleosporales	g__unclassified_o__Pleosporales	s__unclassified_o__Pleosporales	OTU1743	1	1.7852e-06	0.0555556
d__Eukaryota	k__Fungi	p__Ascomycota	c__Sordariomycetes	o__unclassified_c__Sordariomycetes	f__unclassified_c__Sordariomycetes	g__unclassified_c__Sordariomycetes	s__unclassified_c__Sordariomycetes	OTU589	4	7.14082e-06	0.0555556
d__Eukaryota	k__Fungi	p__Ascomycota	c__Sordariomycetes	o__Hypocreales	f__Cordycipitaceae	g__Beauveria	s__Beauveria_bassiana	OTU1504	1	1.7852e-06	0.0555556
d__Eukaryota	k__Fungi	p__Ascomycota	c__Lecanoromycetes	o__Lecanorales	f__Pilocarpaceae	g__Byssoloma	s__Byssoloma_marginatum	OTU940	2	3.57041e-06	0.0555556
d__Eukaryota	k__Fungi	p__unclassified_k__Fungi	c__unclassified_k__Fungi	o__unclassified_k__Fungi	f__unclassified_k__Fungi	g__unclassified_k__Fungi	s__unclassified_k__Fungi	OTU1199	14	2.49929e-05	0.166667
d__Eukaryota	k__Fungi	p__unclassified_k__Fungi	c__unclassified_k__Fungi	o__unclassified_k__Fungi	f__unclassified_k__Fungi	g__unclassified_k__Fungi	s__unclassified_k__Fungi	OTU1466	3	5.35561e-06	0.0555556
d__Eukaryota	k__Fungi	p__Ascomycota	c__Dothideomycetes	o__Botryosphaeriales	f__Phyllostictaceae	g__Phyllosticta	s__Phyllosticta_capitalensis	OTU1516	8133	0.0145191	0.611111
d__Eukaryota	k__Fungi	p__Basidiomycota	c__Tremellomycetes	o__Tremellales	f__unclassified_o__Tremellales	g__unclassified_o__Tremellales	s__unclassified_o__Tremellales	OTU875	12	2.14225e-05	0.166667
d__Eukaryota	k__Fungi	p__Ascomycota	c__Dothideomycetes	o__Pleosporales	f__Didymosphaeriaceae	g__Montagnula	s__unclassified_g__Montagnula	OTU941	36	6.42674e-05	0.111111
d__Eukaryota	k__Fungi	p__Basidiomycota	c__unclassified_p__Basidiomycota	o__unclassified_p__Basidiomycota	f__unclassified_p__Basidiomycota	g__unclassified_p__Basidiomycota	s__unclassified_p__Basidiomycota	OTU263	19	3.39189e-05	0.166667
d__Eukaryota	k__Fungi	p__Ascomycota	c__Saccharomycetes	o__Saccharomycetales	f__Saccharomycetales_fam_Incertae_sedis	g__Diutina	s__Diutina_catenulata	OTU555	88	0.000157098	0.222222
d__Eukaryota	k__Fungi	p__Basidiomycota	c__Malasseziomycetes	o__Malasseziales	f__Malasseziaceae	g__Malassezia	s__Malassezia_sp	OTU734	3	5.35561e-06	0.0555556
d__Eukaryota	k__Fungi	p__Ascomycota	c__Sordariomycetes	o__Glomerellales	f__Plectosphaerellaceae	g__Plectosphaerella	s__Plectosphaerella_sp	OTU590	27	4.82005e-05	0.0555556
d__Eukaryota	k__Fungi	p__Ascomycota	c__Sordariomycetes	o__Xylariales	f__Xylariaceae	g__Xylaria	s__unclassified_g__Xylaria	OTU1211	4	7.14082e-06	0.0555556
d__Eukaryota	k__Fungi	p__Ascomycota	c__Dothideomycetes	o__Capnodiales	f__Cladosporiaceae	g__Cladosporium	s__Cladosporium_velox	OTU1213	5	8.92602e-06	0.111111
d__Eukaryota	k__Fungi	p__Ascomycota	c__Sordariomycetes	o__Diaporthales	f__Diaporthaceae	g__Diaporthe	s__unclassified_g__Diaporthe	OTU636	152	0.000271351	0.333333
d__Eukaryota	k__Fungi	p__Ascomycota	c__Leotiomycetes	o__Helotiales	f__Dermateaceae	g__Pezicula	s__unclassified_g__Pezicula	OTU807	29	5.17709e-05	0.222222
d__Eukaryota	k__Fungi	p__Ascomycota	c__Sordariomycetes	o__Hypocreales	f__Nectriaceae	g__Calonectria	s__unclassified_g__Calonectria	OTU1461	1	1.7852e-06	0.0555556
d__Eukaryota	k__Fungi	p__Ascomycota	c__Eurotiomycetes	o__Chaetothyriales	f__Chaetothyriales_fam_Incertae_sedis	g__Strelitziana	s__unclassified_g__Strelitziana	OTU970	121	0.00021601	0.166667
d__Eukaryota	k__Fungi	p__Ascomycota	c__Sordariomycetes	o__Diaporthales	f__Diaporthaceae	g__Diaporthe	s__Diaporthe_masirevicii	OTU2000	3674	0.00655884	0.611111
d__Eukaryota	k__Fungi	p__Ascomycota	c__Sordariomycetes	o__Xylariales	f__Apiosporaceae	g__Arthrinium	s__Arthrinium_marii	OTU1597	234	0.000417738	0.277778
d__Eukaryota	k__Fungi	p__Basidiomycota	c__Tremellomycetes	o__Tremellales	f__Trimorphomycetaceae	g__Saitozyma	s__Saitozyma_sp	OTU927	799	0.00142638	0.333333
d__Eukaryota	k__Fungi	p__Basidiomycota	c__Agaricomycetes	o__Agaricales	f__Psathyrellaceae	g__Psathyrella	s__Psathyrella_sulcatotuberculosa	OTU1225	3	5.35561e-06	0.0555556
d__Eukaryota	k__Fungi	p__Ascomycota	c__Sordariomycetes	o__Hypocreales	f__Nectriaceae	g__unclassified_f__Nectriaceae	s__unclassified_f__Nectriaceae	OTU1188	18	3.21337e-05	0.0555556
d__Eukaryota	k__Fungi	p__Basidiomycota	c__Tremellomycetes	o__Trichosporonales	f__Trichosporonaceae	g__Apiotrichum	s__Apiotrichum_montevideense	OTU72	4	7.14082e-06	0.111111
d__Eukaryota	k__Fungi	p__Ascomycota	c__Sordariomycetes	o__Hypocreales	f__Clavicipitaceae	g__unclassified_f__Clavicipitaceae	s__unclassified_f__Clavicipitaceae	OTU987	92	0.000164239	0.111111
d__Eukaryota	k__Fungi	p__Ascomycota	c__Eurotiomycetes	o__Chaetothyriales	f__Cyphellophoraceae	g__Cyphellophora	s__Cyphellophora_jingdongensis	OTU521	2	3.57041e-06	0.0555556
d__Eukaryota	k__Fungi	p__Ascomycota	c__Eurotiomycetes	o__Chaetothyriales	f__Trichomeriaceae	g__Lithophila	s__Lithophila_guttulata	OTU728	1	1.7852e-06	0.0555556
d__Eukaryota	k__Fungi	p__Ascomycota	c__Sordariomycetes	o__Hypocreales	f__Nectriaceae	g__Fusicolla	s__unclassified_g__Fusicolla	OTU1226	3	5.35561e-06	0.0555556
d__Eukaryota	k__Fungi	p__Ascomycota	c__Sordariomycetes	o__Hypocreales	f__Bionectriaceae	g__Clonostachys	s__Clonostachys_sp	OTU905	651	0.00116217	0.277778
d__Eukaryota	k__Fungi	p__Ascomycota	c__Eurotiomycetes	o__Eurotiales	f__Trichocomaceae	g__Talaromyces	s__Talaromyces_purpureogenus	OTU860	5	8.92602e-06	0.0555556
d__Eukaryota	k__Fungi	p__Ascomycota	c__Eurotiomycetes	o__Chaetothyriales	f__Herpotrichiellaceae	g__Exophiala	s__Exophiala_sp	OTU1999	35	6.24821e-05	0.111111
d__Eukaryota	k__Fungi	p__Ascomycota	c__Sordariomycetes	o__Xylariales	f__Apiosporaceae	g__Arthrinium	s__unclassified_g__Arthrinium	OTU1083	3	5.35561e-06	0.111111
d__Eukaryota	k__Fungi	p__Ascomycota	c__Dothideomycetes	o__Capnodiales	f__Cladosporiaceae	g__Cladosporium	s__Cladosporium_delicatulum	OTU1528	5943	0.0106095	0.944444
d__Eukaryota	k__Fungi	p__Ascomycota	c__Sordariomycetes	o__Glomerellales	f__Glomerellaceae	g__Colletotrichum	s__unclassified_g__Colletotrichum	OTU592	11	1.96372e-05	0.0555556
d__Eukaryota	k__Fungi	p__Ascomycota	c__Eurotiomycetes	o__Chaetothyriales	f__Herpotrichiellaceae	g__Exophiala	s__unclassified_g__Exophiala	OTU282	1	1.7852e-06	0.0555556
d__Eukaryota	k__Fungi	p__Ascomycota	c__Dothideomycetes	o__Pleosporales	f__Pleosporales_fam_Incertae_sedis	g__Dokmaia	s__Dokmaia_sp	OTU1586	4	7.14082e-06	0.0555556
d__Eukaryota	k__Fungi	p__Ascomycota	c__Sordariomycetes	o__Hypocreales	f__Nectriaceae	g__Neocosmospora	s__Neocosmospora_rubicola	OTU1507	113	0.000201728	0.277778
d__Eukaryota	k__Fungi	p__Ascomycota	c__Leotiomycetes	o__Helotiales	f__Helotiaceae	g__Scytalidium	s__Scytalidium_circinatum	OTU126	265	0.000473079	0.222222
d__Eukaryota	k__Fungi	p__Ascomycota	c__Dothideomycetes	o__Pleosporales	f__Phaeosphaeriaceae	g__unclassified_f__Phaeosphaeriaceae	s__unclassified_f__Phaeosphaeriaceae	OTU2111	8	1.42816e-05	0.0555556
d__Eukaryota	k__Fungi	p__Basidiomycota	c__Agaricomycetes	o__Trechisporales	f__Hydnodontaceae	g__Trechispora	s__Trechispora_sp	OTU1816	2	3.57041e-06	0.0555556
d__Eukaryota	k__Fungi	p__Basidiomycota	c__Microbotryomycetes	o__Sporidiobolales	f__Sporidiobolaceae	g__Rhodotorula	s__Rhodotorula_paludigena	OTU604	125	0.000223151	0.277778
d__Eukaryota	k__Fungi	p__Ascomycota	c__Sordariomycetes	o__Chaetosphaeriales	f__Chaetosphaeriaceae	g__Gonytrichum	s__Gonytrichum_macrocladum_var._terricola	OTU929	30	5.35561e-05	0.0555556
d__Eukaryota	k__Fungi	p__unclassified_k__Fungi	c__unclassified_k__Fungi	o__unclassified_k__Fungi	f__unclassified_k__Fungi	g__unclassified_k__Fungi	s__unclassified_k__Fungi	OTU1509	17	3.03485e-05	0.0555556
d__Eukaryota	k__Fungi	p__Basidiomycota	c__Ustilaginomycetes	o__Ustilaginales	f__Ustilaginaceae	g__Moesziomyces	s__unclassified_g__Moesziomyces	OTU1487	7	1.24964e-05	0.0555556
d__Eukaryota	k__Fungi	p__Ascomycota	c__Sordariomycetes	o__Xylariales	f__Xylariaceae	g__Daldinia	s__Daldinia_eschscholtzii	OTU952	2	3.57041e-06	0.0555556
d__Eukaryota	k__Fungi	p__Ascomycota	c__Dothideomycetes	o__Pleosporales	f__Phaeosphaeriaceae	g__Setophoma	s__unclassified_g__Setophoma	OTU986	66	0.000117823	0.222222
d__Eukaryota	k__Fungi	p__Ascomycota	c__Sordariomycetes	o__Hypocreales	f__Bionectriaceae	g__Gliomastix	s__Gliomastix_murorum	OTU1227	40	7.14082e-05	0.0555556
d__Eukaryota	k__Fungi	p__Basidiomycota	c__Agaricomycetes	o__Polyporales	f__Meruliaceae	g__Emmia	s__Emmia_sp	OTU602	5	8.92602e-06	0.0555556
d__Eukaryota	k__Fungi	p__Ascomycota	c__Dothideomycetes	o__Pleosporales	f__Didymosphaeriaceae	g__Spegazzinia	s__Spegazzinia_sp	OTU962	3	5.35561e-06	0.0555556
d__Eukaryota	k__Fungi	p__Ascomycota	c__Sordariomycetes	o__Sordariales	f__Lasiosphaeriaceae	g__Cercophora	s__Cercophora_mirabilis	OTU1314	5	8.92602e-06	0.0555556
d__Eukaryota	k__Fungi	p__Ascomycota	c__Sordariomycetes	o__Conioscyphales	f__unclassified_o__Conioscyphales	g__unclassified_o__Conioscyphales	s__unclassified_o__Conioscyphales	OTU1396	5	8.92602e-06	0.0555556
d__Eukaryota	k__Fungi	p__Ascomycota	c__Sordariomycetes	o__Xylariales	f__Xylariaceae	g__unclassified_f__Xylariaceae	s__unclassified_f__Xylariaceae	OTU803	2	3.57041e-06	0.0555556
d__Eukaryota	k__Fungi	p__Ascomycota	c__Eurotiomycetes	o__Chaetothyriales	f__Herpotrichiellaceae	g__Cladophialophora	s__Cladophialophora_sp	OTU1057	193	0.000344544	0.111111
d__Eukaryota	k__Fungi	p__Ascomycota	c__Sordariomycetes	o__unclassified_c__Sordariomycetes	f__unclassified_c__Sordariomycetes	g__unclassified_c__Sordariomycetes	s__unclassified_c__Sordariomycetes	OTU1010	2	3.57041e-06	0.0555556
d__Eukaryota	k__Fungi	p__Ascomycota	c__Sordariomycetes	o__Xylariales	f__Apiosporaceae	g__Arthrinium	s__Arthrinium_rasikravindrae	OTU622	232	0.000414167	0.444444
d__Eukaryota	k__Fungi	p__Ascomycota	c__Sordariomycetes	o__Hypocreales	f__unclassified_o__Hypocreales	g__unclassified_o__Hypocreales	s__unclassified_o__Hypocreales	OTU1174	5	8.92602e-06	0.0555556
d__Eukaryota	k__Fungi	p__Basidiomycota	c__Cystobasidiomycetes	o__Erythrobasidiales	f__Erythrobasidiaceae	g__Bannoa	s__Bannoa_sp	OTU517	3	5.35561e-06	0.0555556
d__Eukaryota	k__Fungi	p__Ascomycota	c__Sordariomycetes	o__Diaporthales	f__unclassified_o__Diaporthales	g__unclassified_o__Diaporthales	s__unclassified_o__Diaporthales	OTU600	229	0.000408812	0.277778
d__Eukaryota	k__Fungi	p__Ascomycota	c__Dothideomycetes	o__Pleosporales	f__unclassified_o__Pleosporales	g__unclassified_o__Pleosporales	s__unclassified_o__Pleosporales	OTU114	103	0.000183876	0.166667
d__Eukaryota	k__Fungi	p__Ascomycota	c__Dothideomycetes	o__Capnodiales	f__Mycosphaerellaceae	g__Cercospora	s__unclassified_g__Cercospora	OTU1510	56516	0.100893	0.5
d__Eukaryota	k__Fungi	p__Ascomycota	c__Lecanoromycetes	o__Peltigerales	f__Pannariaceae	g__Degelia	s__Degelia_sp	OTU1221	4	7.14082e-06	0.0555556
d__Eukaryota	k__Fungi	p__Ascomycota	c__Dothideomycetes	o__Pleosporales	f__unclassified_o__Pleosporales	g__unclassified_o__Pleosporales	s__unclassified_o__Pleosporales	OTU119	20	3.57041e-05	0.166667
d__Eukaryota	k__Fungi	p__Ascomycota	c__Sordariomycetes	o__Xylariales	f__Xylariaceae	g__Hypoxylon	s__Hypoxylon_commutatum	OTU1369	6	1.07112e-05	0.0555556
d__Eukaryota	k__Fungi	p__Basidiomycota	c__Agaricomycetes	o__Agaricales	f__Cystostereaceae	g__unclassified_f__Cystostereaceae	s__unclassified_f__Cystostereaceae	OTU1351	5	8.92602e-06	0.0555556
d__Eukaryota	k__Fungi	p__Ascomycota	c__Sordariomycetes	o__Xylariales	f__unclassified_o__Xylariales	g__unclassified_o__Xylariales	s__unclassified_o__Xylariales	OTU1103	14	2.49929e-05	0.111111
d__Eukaryota	k__Fungi	p__Basidiomycota	c__Agaricomycetes	o__Agaricales	f__Bolbitiaceae	g__Panaeolus	s__Panaeolus_papilionaceus	OTU652	25	4.46301e-05	0.0555556
d__Eukaryota	k__Fungi	p__Ascomycota	c__Sordariomycetes	o__unclassified_c__Sordariomycetes	f__unclassified_c__Sordariomycetes	g__unclassified_c__Sordariomycetes	s__unclassified_c__Sordariomycetes	OTU755	5	8.92602e-06	0.0555556
d__Eukaryota	k__Fungi	p__Ascomycota	c__Sordariomycetes	o__unclassified_c__Sordariomycetes	f__unclassified_c__Sordariomycetes	g__unclassified_c__Sordariomycetes	s__unclassified_c__Sordariomycetes	OTU758	1	1.7852e-06	0.0555556
d__Eukaryota	k__Fungi	p__Ascomycota	c__Arthoniomycetes	o__Arthoniales	f__Arthoniaceae	g__Arthothelium	s__Arthothelium_spectabile	OTU841	1	1.7852e-06	0.0555556
d__Eukaryota	k__Fungi	p__Ascomycota	c__Sordariomycetes	o__Xylariales	f__Xylariaceae	g__Biscogniauxia	s__Biscogniauxia_atropunctata	OTU562	5	8.92602e-06	0.0555556
d__Eukaryota	k__Fungi	p__Basidiomycota	c__Agaricomycetes	o__Boletales	f__Boletaceae	g__Boletus	s__Boletus_monilifer	OTU1070	9	1.60668e-05	0.0555556
d__Eukaryota	k__Fungi	p__Ascomycota	c__Dothideomycetes	o__Pleosporales	f__Melanommataceae	g__Trematophoma	s__Trematophoma_sp	OTU1473	7	1.24964e-05	0.0555556
d__Eukaryota	k__Fungi	p__Ascomycota	c__Sordariomycetes	o__Hypocreales	f__Cordycipitaceae	g__Lecanicillium	s__Lecanicillium_subprimulinum	OTU679	18	3.21337e-05	0.0555556
d__Eukaryota	k__Fungi	p__Ascomycota	c__Sordariomycetes	o__Sordariales	f__Chaetomiaceae	g__Thielavia	s__Thielavia_terricola	OTU1929	2	3.57041e-06	0.0555556
d__Eukaryota	k__Fungi	p__Ascomycota	c__Sordariomycetes	o__Diaporthales	f__unclassified_o__Diaporthales	g__unclassified_o__Diaporthales	s__unclassified_o__Diaporthales	OTU1077	15	2.67781e-05	0.111111
d__Eukaryota	k__Fungi	p__Ascomycota	c__Leotiomycetes	o__Helotiales	f__Dermateaceae	g__Trimmatostroma	s__Trimmatostroma_cordae	OTU1171	4	7.14082e-06	0.0555556
d__Eukaryota	k__Fungi	p__Ascomycota	c__Leotiomycetes	o__Helotiales	f__Dermateaceae	g__unclassified_f__Dermateaceae	s__unclassified_f__Dermateaceae	OTU893	71	0.00012675	0.0555556
d__Eukaryota	k__Fungi	p__Ascomycota	c__Sordariomycetes	o__Diaporthales	f__Diaporthaceae	g__Diaporthe	s__unclassified_g__Diaporthe	OTU1012	3	5.35561e-06	0.0555556
d__Eukaryota	k__Fungi	p__Ascomycota	c__Sordariomycetes	o__Diaporthales	f__Diaporthaceae	g__Diaporthe	s__unclassified_g__Diaporthe	OTU1013	165	0.000294559	0.166667
d__Eukaryota	k__Fungi	p__Ascomycota	c__Dothideomycetes	o__Pleosporales	f__Pleosporales_fam_Incertae_sedis	g__Neomassarina	s__Neomassarina_sp	OTU1107	186	0.000332048	0.111111
d__Eukaryota	k__Fungi	p__Ascomycota	c__Eurotiomycetes	o__Eurotiales	f__Aspergillaceae	g__Penicillium	s__Penicillium_spinulosum	OTU1247	10	1.7852e-05	0.0555556
d__Eukaryota	k__Fungi	p__Ascomycota	c__Saccharomycetes	o__Saccharomycetales	f__unclassified_o__Saccharomycetales	g__unclassified_o__Saccharomycetales	s__unclassified_o__Saccharomycetales	OTU1505	2496	0.00445587	0.555556
d__Eukaryota	k__Fungi	p__Ascomycota	c__Sordariomycetes	o__Hypocreales	f__Hypocreaceae	g__Trichoderma	s__Trichoderma_longibrachiatum	OTU1020	2	3.57041e-06	0.111111
d__Eukaryota	k__Fungi	p__Ascomycota	c__Dothideomycetes	o__Mytilinidales	f__Gloniaceae	g__Cenococcum	s__Cenococcum_geophilum	OTU1282	4	7.14082e-06	0.0555556
d__Eukaryota	k__Fungi	p__Ascomycota	c__Leotiomycetes	o__Helotiales	f__unclassified_o__Helotiales	g__unclassified_o__Helotiales	s__unclassified_o__Helotiales	OTU1164	63	0.000112468	0.166667
d__Eukaryota	k__Fungi	p__Ascomycota	c__Sordariomycetes	o__unclassified_c__Sordariomycetes	f__unclassified_c__Sordariomycetes	g__unclassified_c__Sordariomycetes	s__unclassified_c__Sordariomycetes	OTU917	19	3.39189e-05	0.0555556
d__Eukaryota	k__Fungi	p__Ascomycota	c__Orbiliomycetes	o__Orbiliales	f__Orbiliaceae	g__unclassified_f__Orbiliaceae	s__unclassified_f__Orbiliaceae	OTU1124	9	1.60668e-05	0.111111
d__Eukaryota	k__Fungi	p__Ascomycota	c__Eurotiomycetes	o__Chaetothyriales	f__Herpotrichiellaceae	g__unclassified_f__Herpotrichiellaceae	s__unclassified_f__Herpotrichiellaceae	OTU1406	2	3.57041e-06	0.0555556
d__Eukaryota	k__Fungi	p__Ascomycota	c__Leotiomycetes	o__Helotiales	f__Helotiales_fam_Incertae_sedis	g__Cadophora	s__Cadophora_orchidicola	OTU914	34	6.06969e-05	0.0555556
d__Eukaryota	k__Fungi	p__Mortierellomycota	c__Mortierellomycetes	o__Mortierellales	f__Mortierellaceae	g__Mortierella	s__unclassified_g__Mortierella	OTU849	61	0.000108897	0.0555556
d__Eukaryota	k__Fungi	p__Ascomycota	c__Dothideomycetes	o__Capnodiales	f__Cladosporiaceae	g__Cladosporium	s__Cladosporium_fusiforme	OTU1321	2	3.57041e-06	0.0555556
d__Eukaryota	k__Fungi	p__Ascomycota	c__Saccharomycetes	o__Saccharomycetales	f__Debaryomycetaceae	g__Debaryomyces	s__unclassified_g__Debaryomyces	OTU1587	7	1.24964e-05	0.0555556
d__Eukaryota	k__Fungi	p__Basidiomycota	c__Agaricomycetes	o__unclassified_c__Agaricomycetes	f__unclassified_c__Agaricomycetes	g__unclassified_c__Agaricomycetes	s__unclassified_c__Agaricomycetes	OTU1310	149	0.000265995	0.0555556
d__Eukaryota	k__Fungi	p__Ascomycota	c__Eurotiomycetes	o__Chaetothyriales	f__Herpotrichiellaceae	g__unclassified_f__Herpotrichiellaceae	s__unclassified_f__Herpotrichiellaceae	OTU1088	7	1.24964e-05	0.0555556
d__Eukaryota	k__Fungi	p__Ascomycota	c__Dothideomycetes	o__Capnodiales	f__Teratosphaeriaceae	g__Devriesia	s__Devriesia_strelitziicola	OTU1439	2	3.57041e-06	0.0555556
d__Eukaryota	k__Fungi	p__Ascomycota	c__Sordariomycetes	o__Xylariales	f__Xylariaceae	g__unclassified_f__Xylariaceae	s__unclassified_f__Xylariaceae	OTU783	7	1.24964e-05	0.0555556
d__Eukaryota	k__Fungi	p__Ascomycota	c__Sordariomycetes	o__Phyllachorales	f__Telimenaceae	g__Telimena	s__Telimena_sp	OTU594	15	2.67781e-05	0.111111
d__Eukaryota	k__Fungi	p__Basidiomycota	c__Agaricomycetes	o__Agaricales	f__Strophariaceae	g__Melanotus	s__unclassified_g__Melanotus	OTU1050	12	2.14225e-05	0.0555556
d__Eukaryota	k__Fungi	p__Ascomycota	c__unclassified_p__Ascomycota	o__unclassified_p__Ascomycota	f__unclassified_p__Ascomycota	g__unclassified_p__Ascomycota	s__unclassified_p__Ascomycota	OTU1072	6	1.07112e-05	0.0555556
d__Eukaryota	k__Fungi	p__Ascomycota	c__Eurotiomycetes	o__Chaetothyriales	f__Herpotrichiellaceae	g__Exophiala	s__Exophiala_lecanii-corni	OTU57	26	4.64153e-05	0.0555556
d__Eukaryota	k__Fungi	p__Ascomycota	c__Dothideomycetes	o__Pleosporales	f__Didymosphaeriaceae	g__Pseudopithomyces	s__Pseudopithomyces_chartarum	OTU2100	73	0.00013032	0.277778
d__Eukaryota	k__Fungi	p__Ascomycota	c__Sordariomycetes	o__Boliniales	f__Boliniales_fam_Incertae_sedis	g__Paramicrothyrium	s__Paramicrothyrium_sp	OTU1526	363	0.000648029	0.333333
d__Eukaryota	k__Fungi	p__Ascomycota	c__Eurotiomycetes	o__Chaetothyriales	f__Herpotrichiellaceae	g__Cladophialophora	s__Cladophialophora_sp	OTU1126	3616	0.0064553	0.166667
d__Eukaryota	k__Fungi	p__Basidiomycota	c__Agaricomycetes	o__Agaricales	f__Psathyrellaceae	g__Psathyrella	s__Psathyrella_candolleana	OTU307	1	1.7852e-06	0.0555556
d__Eukaryota	k__Fungi	p__Ascomycota	c__Sordariomycetes	o__Xylariales	f__unclassified_o__Xylariales	g__unclassified_o__Xylariales	s__unclassified_o__Xylariales	OTU774	9	1.60668e-05	0.111111
d__Eukaryota	k__Fungi	p__Basidiomycota	c__Agaricomycetes	o__Agaricales	f__Tricholomataceae	g__Calyptella	s__Calyptella_sp	OTU845	13	2.32077e-05	0.0555556
d__Eukaryota	k__Fungi	p__Ascomycota	c__Dothideomycetes	o__Pleosporales	f__Phaeosphaeriaceae	g__unclassified_f__Phaeosphaeriaceae	s__unclassified_f__Phaeosphaeriaceae	OTU1342	16	2.85633e-05	0.0555556
d__Eukaryota	k__Fungi	p__Ascomycota	c__Sordariomycetes	o__Microascales	f__Halosphaeriaceae	g__Aniptodera	s__Aniptodera_chesapeakensis	OTU742	3	5.35561e-06	0.0555556
d__Eukaryota	k__Fungi	p__Ascomycota	c__Dothideomycetes	o__Pleosporales	f__Periconiaceae	g__Periconia	s__unclassified_g__Periconia	OTU1089	7	1.24964e-05	0.0555556
d__Eukaryota	k__Fungi	p__Basidiomycota	c__Agaricomycetes	o__Agaricales	f__Psathyrellaceae	g__Coprinopsis	s__Coprinopsis_sp	OTU605	43	7.67638e-05	0.0555556
d__Eukaryota	k__Fungi	p__Basidiomycota	c__Agaricomycetes	o__unclassified_c__Agaricomycetes	f__unclassified_c__Agaricomycetes	g__unclassified_c__Agaricomycetes	s__unclassified_c__Agaricomycetes	OTU1067	1	1.7852e-06	0.0555556
d__Eukaryota	k__Fungi	p__Ascomycota	c__unclassified_p__Ascomycota	o__unclassified_p__Ascomycota	f__unclassified_p__Ascomycota	g__unclassified_p__Ascomycota	s__unclassified_p__Ascomycota	OTU1215	22	3.92745e-05	0.0555556
d__Eukaryota	k__Fungi	p__Basidiomycota	c__Agaricomycetes	o__Agaricales	f__Psathyrellaceae	g__Coprinellus	s__Coprinellus_disseminatus	OTU1373	2	3.57041e-06	0.0555556
d__Eukaryota	k__Fungi	p__Basidiomycota	c__Agaricomycetes	o__Hymenochaetales	f__Hymenochaetaceae	g__Phellinus	s__Phellinus_arctostaphyli	OTU1034	1	1.7852e-06	0.0555556
d__Eukaryota	k__Fungi	p__Ascomycota	c__Sordariomycetes	o__Hypocreales	f__Nectriaceae	g__Gliocladiopsis	s__unclassified_g__Gliocladiopsis	OTU931	139	0.000248143	0.111111
d__Eukaryota	k__Fungi	p__Ascomycota	c__Sordariomycetes	o__Diaporthales	f__Diaporthaceae	g__Diaporthe	s__unclassified_g__Diaporthe	OTU1025	136	0.000242788	0.111111
d__Eukaryota	k__Fungi	p__unclassified_k__Fungi	c__unclassified_k__Fungi	o__unclassified_k__Fungi	f__unclassified_k__Fungi	g__unclassified_k__Fungi	s__unclassified_k__Fungi	OTU1362	12	2.14225e-05	0.111111
d__Eukaryota	k__Fungi	p__Ascomycota	c__Saccharomycetes	o__Saccharomycetales	f__Phaffomycetaceae	g__Cyberlindnera	s__Cyberlindnera_sp	OTU881	7	1.24964e-05	0.0555556
d__Eukaryota	k__Fungi	p__Basidiomycota	c__Tremellomycetes	o__Tremellales	f__unclassified_o__Tremellales	g__unclassified_o__Tremellales	s__unclassified_o__Tremellales	OTU1456	8	1.42816e-05	0.0555556
d__Eukaryota	k__Fungi	p__Ascomycota	c__Eurotiomycetes	o__Chaetothyriales	f__unclassified_o__Chaetothyriales	g__unclassified_o__Chaetothyriales	s__unclassified_o__Chaetothyriales	OTU1219	13	2.32077e-05	0.111111
d__Eukaryota	k__Fungi	p__Ascomycota	c__Dothideomycetes	o__Pleosporales	f__Leptosphaeriaceae	g__Subplenodomus	s__Subplenodomus_iridicola	OTU1234	3	5.35561e-06	0.0555556
d__Eukaryota	k__Fungi	p__Ascomycota	c__Sordariomycetes	o__Xylariales	f__unclassified_o__Xylariales	g__unclassified_o__Xylariales	s__unclassified_o__Xylariales	OTU1484	754	0.00134604	0.444444
d__Eukaryota	k__Fungi	p__Ascomycota	c__Dothideomycetes	o__Pleosporales	f__Leptosphaeriaceae	g__Leptosphaeria	s__Leptosphaeria_modesta	OTU992	2	3.57041e-06	0.111111
d__Eukaryota	k__Fungi	p__Ascomycota	c__Sordariomycetes	o__Xylariales	f__Xylariaceae	g__Hypoxylon	s__Hypoxylon_anthochroum	OTU815	1	1.7852e-06	0.0555556
d__Eukaryota	k__Fungi	p__Ascomycota	c__Sordariomycetes	o__Xylariales	f__Xylariaceae	g__Hypoxylon	s__Hypoxylon_neosublenormandii	OTU968	13	2.32077e-05	0.166667
d__Eukaryota	k__Fungi	p__Ascomycota	c__Eurotiomycetes	o__Chaetothyriales	f__Trichomeriaceae	g__Trichomerium	s__unclassified_g__Trichomerium	OTU1361	36	6.42674e-05	0.166667
d__Eukaryota	k__Fungi	p__unclassified_k__Fungi	c__unclassified_k__Fungi	o__unclassified_k__Fungi	f__unclassified_k__Fungi	g__unclassified_k__Fungi	s__unclassified_k__Fungi	OTU1064	6	1.07112e-05	0.0555556
d__Eukaryota	k__Fungi	p__Ascomycota	c__Dothideomycetes	o__Botryosphaeriales	f__Botryosphaeriaceae	g__Neodeightonia	s__Neodeightonia_subglobosa	OTU444	25	4.46301e-05	0.222222
d__Eukaryota	k__Fungi	p__Ascomycota	c__Sordariomycetes	o__unclassified_c__Sordariomycetes	f__unclassified_c__Sordariomycetes	g__unclassified_c__Sordariomycetes	s__unclassified_c__Sordariomycetes	OTU726	1	1.7852e-06	0.0555556
d__Eukaryota	k__Fungi	p__Basidiomycota	c__Agaricomycetes	o__Polyporales	f__Ganodermataceae	g__Ganoderma	s__Ganoderma_multiplicatum	OTU947	16	2.85633e-05	0.166667
d__Eukaryota	k__Fungi	p__Ascomycota	c__Sordariomycetes	o__unclassified_c__Sordariomycetes	f__unclassified_c__Sordariomycetes	g__unclassified_c__Sordariomycetes	s__unclassified_c__Sordariomycetes	OTU1243	4	7.14082e-06	0.0555556
d__Eukaryota	k__Fungi	p__Ascomycota	c__Dothideomycetes	o__Pleosporales	f__Didymosphaeriaceae	g__Pseudopithomyces	s__Pseudopithomyces_maydicus	OTU1315	17	3.03485e-05	0.0555556
d__Eukaryota	k__Fungi	p__Ascomycota	c__Sordariomycetes	o__unclassified_c__Sordariomycetes	f__unclassified_c__Sordariomycetes	g__unclassified_c__Sordariomycetes	s__unclassified_c__Sordariomycetes	OTU616	36	6.42674e-05	0.111111
d__Eukaryota	k__Fungi	p__Ascomycota	c__Dothideomycetes	o__Pleosporales	f__Lophiotremataceae	g__Lophiotrema	s__Lophiotrema_rubi	OTU1346	1	1.7852e-06	0.0555556
d__Eukaryota	k__Fungi	p__Ascomycota	c__Sordariomycetes	o__Diaporthales	f__unclassified_o__Diaporthales	g__unclassified_o__Diaporthales	s__unclassified_o__Diaporthales	OTU802	1296	0.00231362	0.333333
d__Eukaryota	k__Fungi	p__Chytridiomycota	c__unclassified_p__Chytridiomycota	o__unclassified_p__Chytridiomycota	f__unclassified_p__Chytridiomycota	g__unclassified_p__Chytridiomycota	s__unclassified_p__Chytridiomycota	OTU866	2	3.57041e-06	0.0555556
d__Eukaryota	k__Fungi	p__Ascomycota	c__Dothideomycetes	o__Pleosporales	f__Phaeosphaeriaceae	g__Leptospora	s__Leptospora_rubella	OTU1949	38	6.78378e-05	0.333333
d__Eukaryota	k__Fungi	p__Ascomycota	c__Sordariomycetes	o__Hypocreales	f__Nectriaceae	g__Haematonectria	s__Haematonectria_sp	OTU1138	3	5.35561e-06	0.0555556
d__Eukaryota	k__Fungi	p__Ascomycota	c__Eurotiomycetes	o__Chaetothyriales	f__unclassified_o__Chaetothyriales	g__unclassified_o__Chaetothyriales	s__unclassified_o__Chaetothyriales	OTU1142	299	0.000533776	0.166667
d__Eukaryota	k__Fungi	p__Ascomycota	c__Dothideomycetes	o__Pleosporales	f__unclassified_o__Pleosporales	g__unclassified_o__Pleosporales	s__unclassified_o__Pleosporales	OTU102	583	0.00104077	0.166667
d__Eukaryota	k__Fungi	p__Ascomycota	c__Dothideomycetes	o__Pleosporales	f__Didymosphaeriaceae	g__Montagnula	s__unclassified_g__Montagnula	OTU2043	34	6.06969e-05	0.166667
d__Eukaryota	k__Fungi	p__Basidiomycota	c__Pucciniomycetes	o__Platygloeales	f__unclassified_o__Platygloeales	g__unclassified_o__Platygloeales	s__unclassified_o__Platygloeales	OTU1061	1	1.7852e-06	0.0555556
d__Eukaryota	k__Fungi	p__Ascomycota	c__Sordariomycetes	o__Xylariales	f__Xylariaceae	g__unclassified_f__Xylariaceae	s__unclassified_f__Xylariaceae	OTU1092	1	1.7852e-06	0.0555556
d__Eukaryota	k__Fungi	p__Ascomycota	c__Sordariomycetes	o__Xylariales	f__unclassified_o__Xylariales	g__unclassified_o__Xylariales	s__unclassified_o__Xylariales	OTU1325	17	3.03485e-05	0.0555556
d__Eukaryota	k__Fungi	p__Basidiomycota	c__unclassified_p__Basidiomycota	o__unclassified_p__Basidiomycota	f__unclassified_p__Basidiomycota	g__unclassified_p__Basidiomycota	s__unclassified_p__Basidiomycota	OTU1358	8	1.42816e-05	0.0555556
d__Eukaryota	k__Fungi	p__Ascomycota	c__Sordariomycetes	o__Xylariales	f__Xylariaceae	g__Annulohypoxylon	s__unclassified_g__Annulohypoxylon	OTU1413	3	5.35561e-06	0.0555556
d__Eukaryota	k__Fungi	p__Ascomycota	c__Sordariomycetes	o__Hypocreales	f__unclassified_o__Hypocreales	g__unclassified_o__Hypocreales	s__unclassified_o__Hypocreales	OTU1224	13	2.32077e-05	0.0555556
d__Eukaryota	k__Fungi	p__Ascomycota	c__Sordariomycetes	o__Xylariales	f__Microdochiaceae	g__Microdochium	s__Microdochium_colombiense	OTU1947	177	0.000315981	0.166667
d__Eukaryota	k__Fungi	p__Ascomycota	c__Eurotiomycetes	o__Chaetothyriales	f__Herpotrichiellaceae	g__Cladophialophora	s__unclassified_g__Cladophialophora	OTU1175	3	5.35561e-06	0.0555556
d__Eukaryota	k__Fungi	p__Basidiomycota	c__Microbotryomycetes	o__Microbotryomycetes_ord_Incertae_sedis	f__Microbotryomycetes_fam_Incertae_sedis	g__Colacogloea	s__Colacogloea_sp	OTU1095	3	5.35561e-06	0.0555556
d__Eukaryota	k__Fungi	p__Basidiomycota	c__Agaricomycetes	o__unclassified_c__Agaricomycetes	f__unclassified_c__Agaricomycetes	g__unclassified_c__Agaricomycetes	s__unclassified_c__Agaricomycetes	OTU906	234	0.000417738	0.111111
d__Eukaryota	k__Fungi	p__Basidiomycota	c__Agaricomycetes	o__Trechisporales	f__Hydnodontaceae	g__Trechispora	s__unclassified_g__Trechispora	OTU1037	4	7.14082e-06	0.0555556
d__Eukaryota	k__Fungi	p__Ascomycota	c__Sordariomycetes	o__Hypocreales	f__Bionectriaceae	g__Ijuhya	s__Ijuhya_sp	OTU1231	11	1.96372e-05	0.0555556
d__Eukaryota	k__Fungi	p__Ascomycota	c__Dothideomycetes	o__Pleosporales	f__Pleosporaceae	g__Alternaria	s__Alternaria_macrospora	OTU84	2	3.57041e-06	0.0555556
d__Eukaryota	k__Fungi	p__Basidiomycota	c__Agaricostilbomycetes	o__Agaricostilbales	f__Chionosphaeraceae	g__unclassified_f__Chionosphaeraceae	s__unclassified_f__Chionosphaeraceae	OTU1319	6	1.07112e-05	0.0555556
d__Eukaryota	k__Fungi	p__Ascomycota	c__Dothideomycetes	o__Pleosporales	f__Didymellaceae	g__Epicoccum	s__Epicoccum_nigrum	OTU1150	77	0.000137461	0.222222
d__Eukaryota	k__Fungi	p__Basidiomycota	c__Cystobasidiomycetes	o__Cystobasidiales	f__Cystobasidiaceae	g__Cystobasidium	s__Cystobasidium_minuta	OTU1660	54	9.6401e-05	0.166667
d__Eukaryota	k__Fungi	p__Ascomycota	c__Dothideomycetes	o__Capnodiales	f__unclassified_o__Capnodiales	g__unclassified_o__Capnodiales	s__unclassified_o__Capnodiales	OTU955	54	9.6401e-05	0.166667
d__Eukaryota	k__Fungi	p__Ascomycota	c__Eurotiomycetes	o__Chaetothyriales	f__Trichomeriaceae	g__Knufia	s__Knufia_tsunedae	OTU577	2	3.57041e-06	0.111111
d__Eukaryota	k__Fungi	p__Ascomycota	c__Dothideomycetes	o__Pleosporales	f__Phaeosphaeriaceae	g__unclassified_f__Phaeosphaeriaceae	s__unclassified_f__Phaeosphaeriaceae	OTU1217	2	3.57041e-06	0.0555556
d__Eukaryota	k__Fungi	p__Ascomycota	c__unclassified_p__Ascomycota	o__unclassified_p__Ascomycota	f__unclassified_p__Ascomycota	g__unclassified_p__Ascomycota	s__unclassified_p__Ascomycota	OTU1060	126	0.000224936	0.277778
d__Eukaryota	k__Fungi	p__Ascomycota	c__Leotiomycetes	o__Helotiales	f__Helotiaceae	g__Tetracladium	s__unclassified_g__Tetracladium	OTU1022	255	0.000455227	0.111111
d__Eukaryota	k__Fungi	p__Ascomycota	c__Sordariomycetes	o__Glomerellales	f__Glomerellaceae	g__Colletotrichum	s__unclassified_g__Colletotrichum	OTU574	2	3.57041e-06	0.0555556
d__Eukaryota	k__Fungi	p__Ascomycota	c__Dothideomycetes	o__Capnodiales	f__Mycosphaerellaceae	g__unclassified_f__Mycosphaerellaceae	s__unclassified_f__Mycosphaerellaceae	OTU795	6	1.07112e-05	0.111111
d__Eukaryota	k__Fungi	p__Ascomycota	c__Sordariomycetes	o__Hypocreales	f__Hypocreaceae	g__Trichoderma	s__unclassified_g__Trichoderma	OTU850	30	5.35561e-05	0.0555556
d__Eukaryota	k__Fungi	p__Ascomycota	c__Dothideomycetes	o__Pleosporales	f__Lophiostomataceae	g__Lophiostoma	s__Lophiostoma_macrostomum	OTU2001	10	1.7852e-05	0.111111
d__Eukaryota	k__Fungi	p__Ascomycota	c__Dothideomycetes	o__Pleosporales	f__Montagnulaceae	g__unclassified_f__Montagnulaceae	s__Montagnulaceae_sp	OTU1136	1	1.7852e-06	0.0555556
d__Eukaryota	k__Fungi	p__Ascomycota	c__Leotiomycetes	o__Helotiales	f__unclassified_o__Helotiales	g__unclassified_o__Helotiales	s__unclassified_o__Helotiales	OTU1023	2	3.57041e-06	0.0555556
d__Eukaryota	k__Fungi	p__Ascomycota	c__Eurotiomycetes	o__Chaetothyriales	f__Herpotrichiellaceae	g__Cladophialophora	s__Cladophialophora_sp	OTU1260	4	7.14082e-06	0.0555556
d__Eukaryota	k__Fungi	p__Ascomycota	c__Eurotiomycetes	o__Chaetothyriales	f__Herpotrichiellaceae	g__Cladophialophora	s__Cladophialophora_sp	OTU209	5	8.92602e-06	0.0555556
d__Eukaryota	k__Fungi	p__Ascomycota	c__Sordariomycetes	o__Hypocreales	f__Nectriaceae	g__Ilyonectria	s__Ilyonectria_crassa	OTU932	5679	0.0101382	0.222222
d__Eukaryota	k__Fungi	p__Chytridiomycota	c__unclassified_p__Chytridiomycota	o__unclassified_p__Chytridiomycota	f__unclassified_p__Chytridiomycota	g__unclassified_p__Chytridiomycota	s__unclassified_p__Chytridiomycota	OTU867	2	3.57041e-06	0.0555556
d__Eukaryota	k__Fungi	p__Ascomycota	c__Eurotiomycetes	o__Chaetothyriales	f__Cyphellophoraceae	g__Cyphellophora	s__Cyphellophora_europaea	OTU1139	15	2.67781e-05	0.111111
d__Eukaryota	k__Fungi	p__Ascomycota	c__Sordariomycetes	o__Hypocreales	f__Bionectriaceae	g__Clonostachys	s__Clonostachys_epichloe	OTU1903	3	5.35561e-06	0.0555556
d__Eukaryota	k__Fungi	p__Ascomycota	c__unclassified_p__Ascomycota	o__unclassified_p__Ascomycota	f__unclassified_p__Ascomycota	g__unclassified_p__Ascomycota	s__unclassified_p__Ascomycota	OTU413	1	1.7852e-06	0.0555556
d__Eukaryota	k__Fungi	p__Ascomycota	c__Dothideomycetes	o__Pleosporales	f__Periconiaceae	g__Periconia	s__unclassified_g__Periconia	OTU958	1	1.7852e-06	0.0555556
d__Eukaryota	k__Fungi	p__Ascomycota	c__Eurotiomycetes	o__Chaetothyriales	f__Herpotrichiellaceae	g__Cladophialophora	s__Cladophialophora_sp	OTU1192	8	1.42816e-05	0.0555556
d__Eukaryota	k__Fungi	p__Ascomycota	c__Sordariomycetes	o__Boliniales	f__Boliniales_fam_Incertae_sedis	g__Paramicrothyrium	s__Paramicrothyrium_sp	OTU1937	18	3.21337e-05	0.111111
d__Eukaryota	k__Fungi	p__unclassified_k__Fungi	c__unclassified_k__Fungi	o__unclassified_k__Fungi	f__unclassified_k__Fungi	g__unclassified_k__Fungi	s__unclassified_k__Fungi	OTU1313	1	1.7852e-06	0.0555556
d__Eukaryota	k__Fungi	p__Ascomycota	c__unclassified_p__Ascomycota	o__unclassified_p__Ascomycota	f__unclassified_p__Ascomycota	g__unclassified_p__Ascomycota	s__unclassified_p__Ascomycota	OTU1448	2	3.57041e-06	0.0555556
d__Eukaryota	k__Fungi	p__Ascomycota	c__Sordariomycetes	o__Glomerellales	f__Glomerellaceae	g__Colletotrichum	s__Colletotrichum_boninense	OTU657	657	0.00117288	0.555556
d__Eukaryota	k__Fungi	p__Ascomycota	c__unclassified_p__Ascomycota	o__unclassified_p__Ascomycota	f__unclassified_p__Ascomycota	g__unclassified_p__Ascomycota	s__unclassified_p__Ascomycota	OTU1443	2	3.57041e-06	0.0555556
d__Eukaryota	k__Fungi	p__Ascomycota	c__Sordariomycetes	o__Hypocreales	f__Hypocreales_fam_Incertae_sedis	g__Sarocladium	s__unclassified_g__Sarocladium	OTU1481	27	4.82005e-05	0.0555556
d__Eukaryota	k__Fungi	p__Ascomycota	c__Sordariomycetes	o__Sordariales	f__Chaetomiaceae	g__Zopfiella	s__Zopfiella_sp	OTU649	31	5.53413e-05	0.111111
d__Eukaryota	k__Fungi	p__Basidiomycota	c__Agaricomycetes	o__Trechisporales	f__Hydnodontaceae	g__Trechispora	s__Trechispora_sp	OTU1258	7	1.24964e-05	0.111111
d__Eukaryota	k__Fungi	p__Ascomycota	c__Dothideomycetes	o__Pleosporales	f__unclassified_o__Pleosporales	g__unclassified_o__Pleosporales	s__unclassified_o__Pleosporales	OTU1257	3	5.35561e-06	0.0555556
d__Eukaryota	k__Fungi	p__Ascomycota	c__Dothideomycetes	o__Pleosporales	f__Phaeosphaeriaceae	g__Setophoma	s__Setophoma_vernoniae	OTU351	1	1.7852e-06	0.0555556
d__Eukaryota	k__Fungi	p__Ascomycota	c__Eurotiomycetes	o__Chaetothyriales	f__Cyphellophoraceae	g__unclassified_f__Cyphellophoraceae	s__unclassified_f__Cyphellophoraceae	OTU1128	60	0.000107112	0.166667
d__Eukaryota	k__Fungi	p__Basidiomycota	c__Agaricomycetes	o__Agaricales	f__Amanitaceae	g__Amanita	s__Amanita_tenuifolia	OTU872	13	2.32077e-05	0.0555556
d__Eukaryota	k__Fungi	p__Ascomycota	c__Dothideomycetes	o__Pleosporales	f__Didymosphaeriaceae	g__Paraconiothyrium	s__Paraconiothyrium_variabile	OTU1897	114	0.000203513	0.111111
d__Eukaryota	k__Fungi	p__Ascomycota	c__Eurotiomycetes	o__Chaetothyriales	f__Herpotrichiellaceae	g__Exophiala	s__Exophiala_cancerae	OTU902	15322	0.0273529	0.333333
d__Eukaryota	k__Fungi	p__Ascomycota	c__Sordariomycetes	o__unclassified_c__Sordariomycetes	f__unclassified_c__Sordariomycetes	g__unclassified_c__Sordariomycetes	s__unclassified_c__Sordariomycetes	OTU735	6	1.07112e-05	0.0555556
d__Eukaryota	k__Fungi	p__Ascomycota	c__Sordariomycetes	o__unclassified_c__Sordariomycetes	f__unclassified_c__Sordariomycetes	g__unclassified_c__Sordariomycetes	s__unclassified_c__Sordariomycetes	OTU1384	17	3.03485e-05	0.0555556
d__Eukaryota	k__Fungi	p__Ascomycota	c__Dothideomycetes	o__Pleosporales	f__Pleosporaceae	g__Stemphylium	s__unclassified_g__Stemphylium	OTU1501	175	0.000312411	0.0555556
d__Eukaryota	k__Fungi	p__Basidiomycota	c__Agaricomycetes	o__Cantharellales	f__Ceratobasidiaceae	g__unclassified_f__Ceratobasidiaceae	s__unclassified_f__Ceratobasidiaceae	OTU989	54	9.6401e-05	0.166667
d__Eukaryota	k__Fungi	p__Ascomycota	c__Sordariomycetes	o__Sordariales	f__Lasiosphaeriaceae	g__Podospora	s__Podospora_longicaudata	OTU817	1	1.7852e-06	0.0555556
d__Eukaryota	k__Fungi	p__Ascomycota	c__unclassified_p__Ascomycota	o__unclassified_p__Ascomycota	f__unclassified_p__Ascomycota	g__unclassified_p__Ascomycota	s__unclassified_p__Ascomycota	OTU935	11	1.96372e-05	0.111111
d__Eukaryota	k__Fungi	p__Basidiomycota	c__Agaricomycetes	o__Agaricales	f__Agaricaceae	g__Micropsalliota	s__unclassified_g__Micropsalliota	OTU1457	1	1.7852e-06	0.0555556
d__Eukaryota	k__Fungi	p__Ascomycota	c__Dothideomycetes	o__Pleosporales	f__Pleosporaceae	g__Alternaria	s__Alternaria_longissima	OTU1254	15	2.67781e-05	0.111111
d__Eukaryota	k__Fungi	p__Ascomycota	c__Sordariomycetes	o__Hypocreales	f__Hypocreales_fam_Incertae_sedis	g__Acremonium	s__Acremonium_collariferum	OTU481	10	1.7852e-05	0.166667
d__Eukaryota	k__Fungi	p__Ascomycota	c__Sordariomycetes	o__Diaporthales	f__Diaporthaceae	g__Diaporthe	s__unclassified_g__Diaporthe	OTU1035	15	2.67781e-05	0.0555556
d__Eukaryota	k__Fungi	p__Ascomycota	c__Eurotiomycetes	o__Eurotiales	f__Aspergillaceae	g__Penicillium	s__Penicillium_citrinum	OTU1581	6	1.07112e-05	0.0555556
d__Eukaryota	k__Fungi	p__Ascomycota	c__Sordariomycetes	o__Diaporthales	f__Diaporthaceae	g__Diaporthe	s__unclassified_g__Diaporthe	OTU1032	174	0.000310626	0.222222
d__Eukaryota	k__Fungi	p__Ascomycota	c__Dothideomycetes	o__Pleosporales	f__Didymellaceae	g__Phoma	s__Phoma_adonidicola	OTU1694	123	0.00021958	0.388889
d__Eukaryota	k__Fungi	p__Ascomycota	c__Dothideomycetes	o__Capnodiales	f__unclassified_o__Capnodiales	g__unclassified_o__Capnodiales	s__unclassified_o__Capnodiales	OTU1099	6	1.07112e-05	0.0555556
d__Eukaryota	k__Fungi	p__Ascomycota	c__Sordariomycetes	o__Xylariales	f__Xylariaceae	g__Hypoxylon	s__Hypoxylon_notatum	OTU984	6	1.07112e-05	0.0555556
d__Eukaryota	k__Fungi	p__unclassified_k__Fungi	c__unclassified_k__Fungi	o__unclassified_k__Fungi	f__unclassified_k__Fungi	g__unclassified_k__Fungi	s__unclassified_k__Fungi	OTU651	2972	0.00530563	0.944444
d__Eukaryota	k__Fungi	p__Ascomycota	c__Sordariomycetes	o__unclassified_c__Sordariomycetes	f__unclassified_c__Sordariomycetes	g__unclassified_c__Sordariomycetes	s__unclassified_c__Sordariomycetes	OTU112	38	6.78378e-05	0.111111
d__Eukaryota	k__Fungi	p__Ascomycota	c__Sordariomycetes	o__unclassified_c__Sordariomycetes	f__unclassified_c__Sordariomycetes	g__unclassified_c__Sordariomycetes	s__unclassified_c__Sordariomycetes	OTU111	27	4.82005e-05	0.166667
d__Eukaryota	k__Fungi	p__Ascomycota	c__Eurotiomycetes	o__Chaetothyriales	f__Trichomeriaceae	g__Knufia	s__Knufia_sp	OTU226	1	1.7852e-06	0.0555556
d__Eukaryota	k__Fungi	p__Ascomycota	c__Sordariomycetes	o__Phomatosporales	f__Phomatosporaceae	g__Phomatospora	s__unclassified_g__Phomatospora	OTU558	6	1.07112e-05	0.0555556
d__Eukaryota	k__Fungi	p__Ascomycota	c__Eurotiomycetes	o__Chaetothyriales	f__Herpotrichiellaceae	g__unclassified_f__Herpotrichiellaceae	s__unclassified_f__Herpotrichiellaceae	OTU1255	34	6.06969e-05	0.111111
d__Eukaryota	k__Fungi	p__Basidiomycota	c__Tremellomycetes	o__Trichosporonales	f__Trichosporonaceae	g__Cutaneotrichosporon	s__Cutaneotrichosporon_curvatus	OTU1511	523	0.000933662	0.333333
d__Eukaryota	k__Fungi	p__Ascomycota	c__Dothideomycetes	o__Capnodiales	f__Mycosphaerellaceae	g__Pallidocercospora	s__Pallidocercospora_crystallina	OTU797	70	0.000124964	0.111111
d__Eukaryota	k__Fungi	p__Ascomycota	c__Dothideomycetes	o__Pleosporales	f__Didymellaceae	g__unclassified_f__Didymellaceae	s__unclassified_f__Didymellaceae	OTU1502	892	0.0015924	0.555556
d__Eukaryota	k__Fungi	p__Ascomycota	c__Dothideomycetes	o__Pleosporales	f__Didymellaceae	g__unclassified_f__Didymellaceae	s__unclassified_f__Didymellaceae	OTU844	21	3.74893e-05	0.166667
d__Eukaryota	k__Fungi	p__unclassified_k__Fungi	c__unclassified_k__Fungi	o__unclassified_k__Fungi	f__unclassified_k__Fungi	g__unclassified_k__Fungi	s__unclassified_k__Fungi	OTU682	25	4.46301e-05	0.0555556
d__Eukaryota	k__Fungi	p__Ascomycota	c__Sordariomycetes	o__Xylariales	f__Xylariaceae	g__Hypoxylon	s__Hypoxylon_lividipigmentum	OTU1163	6	1.07112e-05	0.0555556
d__Eukaryota	k__Fungi	p__Ascomycota	c__Dothideomycetes	o__Pleosporales	f__Didymosphaeriaceae	g__Letendraea	s__Letendraea_cordylinicola	OTU596	12	2.14225e-05	0.0555556
d__Eukaryota	k__Fungi	p__Basidiomycota	c__Agaricomycetes	o__Cantharellales	f__Ceratobasidiaceae	g__unclassified_f__Ceratobasidiaceae	s__unclassified_f__Ceratobasidiaceae	OTU1091	107	0.000191017	0.166667
d__Eukaryota	k__Fungi	p__Ascomycota	c__Dothideomycetes	o__Capnodiales	f__Teratosphaeriaceae	g__Devriesia	s__Devriesia_strelitziicola	OTU1397	3	5.35561e-06	0.0555556
d__Eukaryota	k__Fungi	p__Basidiomycota	c__Microbotryomycetes	o__Sporidiobolales	f__Sporidiobolaceae	g__Sporidiobolus	s__Sporidiobolus_pararoseus	OTU608	126	0.000224936	0.0555556
d__Eukaryota	k__Fungi	p__Ascomycota	c__Dothideomycetes	o__Venturiales	f__Sympoventuriaceae	g__Ochroconis	s__Ochroconis_mirabilis	OTU2045	56	9.99714e-05	0.277778
d__Eukaryota	k__Fungi	p__Ascomycota	c__Eurotiomycetes	o__Chaetothyriales	f__Cyphellophoraceae	g__Cyphellophora	s__Cyphellophora_oxyspora	OTU1894	142	0.000253499	0.277778
d__Eukaryota	k__Fungi	p__unclassified_k__Fungi	c__unclassified_k__Fungi	o__unclassified_k__Fungi	f__unclassified_k__Fungi	g__unclassified_k__Fungi	s__unclassified_k__Fungi	OTU903	46	8.21194e-05	0.0555556
d__Eukaryota	k__Fungi	p__unclassified_k__Fungi	c__unclassified_k__Fungi	o__unclassified_k__Fungi	f__unclassified_k__Fungi	g__unclassified_k__Fungi	s__unclassified_k__Fungi	OTU907	10	1.7852e-05	0.166667
d__Eukaryota	k__Fungi	p__Ascomycota	c__Sordariomycetes	o__Hypocreales	f__Hypocreaceae	g__Trichoderma	s__unclassified_g__Trichoderma	OTU1093	1	1.7852e-06	0.0555556
d__Eukaryota	k__Fungi	p__Ascomycota	c__Leotiomycetes	o__Helotiales	f__Sclerotiniaceae	g__Botrytis	s__unclassified_g__Botrytis	OTU60	28	4.99857e-05	0.166667
d__Eukaryota	k__Fungi	p__Ascomycota	c__unclassified_p__Ascomycota	o__unclassified_p__Ascomycota	f__unclassified_p__Ascomycota	g__unclassified_p__Ascomycota	s__unclassified_p__Ascomycota	OTU1302	4	7.14082e-06	0.0555556
d__Eukaryota	k__Fungi	p__Ascomycota	c__unclassified_p__Ascomycota	o__unclassified_p__Ascomycota	f__unclassified_p__Ascomycota	g__unclassified_p__Ascomycota	s__unclassified_p__Ascomycota	OTU1305	2	3.57041e-06	0.111111
d__Eukaryota	k__Fungi	p__Ascomycota	c__Sordariomycetes	o__Xylariales	f__Xylariaceae	g__Daldinia	s__Daldinia_caldariorum	OTU1387	3	5.35561e-06	0.111111
d__Eukaryota	k__Fungi	p__unclassified_k__Fungi	c__unclassified_k__Fungi	o__unclassified_k__Fungi	f__unclassified_k__Fungi	g__unclassified_k__Fungi	s__unclassified_k__Fungi	OTU1895	6	1.07112e-05	0.166667
d__Eukaryota	k__Fungi	p__Ascomycota	c__unclassified_p__Ascomycota	o__unclassified_p__Ascomycota	f__unclassified_p__Ascomycota	g__unclassified_p__Ascomycota	s__unclassified_p__Ascomycota	OTU1273	3	5.35561e-06	0.0555556
d__Eukaryota	k__Fungi	p__Ascomycota	c__Sordariomycetes	o__Xylariales	f__Xylariaceae	g__Hypoxylon	s__Hypoxylon_notatum	OTU1198	9	1.60668e-05	0.166667
d__Eukaryota	k__Fungi	p__Basidiomycota	c__Agaricomycetes	o__Polyporales	f__Ganodermataceae	g__Perenniporia	s__Perenniporia_bannaensis	OTU1049	7	1.24964e-05	0.111111
d__Eukaryota	k__Fungi	p__Ascomycota	c__Orbiliomycetes	o__Orbiliales	f__Orbiliaceae	g__unclassified_f__Orbiliaceae	s__unclassified_f__Orbiliaceae	OTU939	461	0.000822979	0.0555556
d__Eukaryota	k__Fungi	p__Basidiomycota	c__Agaricomycetes	o__Agaricales	f__Agaricaceae	g__Micropsalliota	s__Micropsalliota_globocystis	OTU1253	3	5.35561e-06	0.0555556
d__Eukaryota	k__Fungi	p__Chytridiomycota	c__unclassified_p__Chytridiomycota	o__unclassified_p__Chytridiomycota	f__unclassified_p__Chytridiomycota	g__unclassified_p__Chytridiomycota	s__unclassified_p__Chytridiomycota	OTU870	5	8.92602e-06	0.0555556
d__Eukaryota	k__Fungi	p__Ascomycota	c__Sordariomycetes	o__unclassified_c__Sordariomycetes	f__unclassified_c__Sordariomycetes	g__unclassified_c__Sordariomycetes	s__unclassified_c__Sordariomycetes	OTU736	332	0.000592688	0.0555556
d__Eukaryota	k__Fungi	p__Ascomycota	c__Eurotiomycetes	o__Eurotiales	f__Aspergillaceae	g__Aspergillus	s__Aspergillus_halophilicus	OTU928	15	2.67781e-05	0.0555556
d__Eukaryota	k__Fungi	p__Basidiomycota	c__Microbotryomycetes	o__Microbotryomycetes_ord_Incertae_sedis	f__Chrysozymaceae	g__Slooffia	s__Slooffia_tsugae	OTU309	4	7.14082e-06	0.111111
d__Eukaryota	k__Fungi	p__Ascomycota	c__unclassified_p__Ascomycota	o__unclassified_p__Ascomycota	f__unclassified_p__Ascomycota	g__unclassified_p__Ascomycota	s__unclassified_p__Ascomycota	OTU543	8840	0.0157812	0.5
d__Eukaryota	k__Fungi	p__Ascomycota	c__Dothideomycetes	o__Botryosphaeriales	f__Botryosphaeriaceae	g__unclassified_f__Botryosphaeriaceae	s__unclassified_f__Botryosphaeriaceae	OTU746	15	2.67781e-05	0.0555556
d__Eukaryota	k__Fungi	p__Ascomycota	c__unclassified_p__Ascomycota	o__unclassified_p__Ascomycota	f__unclassified_p__Ascomycota	g__unclassified_p__Ascomycota	s__unclassified_p__Ascomycota	OTU1472	11	1.96372e-05	0.0555556
d__Eukaryota	k__Fungi	p__Ascomycota	c__Sordariomycetes	o__Conioscyphales	f__unclassified_o__Conioscyphales	g__unclassified_o__Conioscyphales	s__unclassified_o__Conioscyphales	OTU999	7	1.24964e-05	0.0555556
d__Eukaryota	k__Fungi	p__Ascomycota	c__Dothideomycetes	o__Pleosporales	f__Didymellaceae	g__Phoma	s__Phoma_adonidicola	OTU158	3	5.35561e-06	0.0555556
d__Eukaryota	k__Fungi	p__Basidiomycota	c__Agaricomycetes	o__Agaricales	f__Tricholomataceae	g__Omphalina	s__unclassified_g__Omphalina	OTU1056	17	3.03485e-05	0.0555556
d__Eukaryota	k__Fungi	p__Ascomycota	c__Eurotiomycetes	o__Eurotiales	f__Aspergillaceae	g__Aspergillus	s__Aspergillus_penicillioides	OTU843	9	1.60668e-05	0.166667
d__Eukaryota	k__Fungi	p__Ascomycota	c__Sordariomycetes	o__Xylariales	f__unclassified_o__Xylariales	g__unclassified_o__Xylariales	s__unclassified_o__Xylariales	OTU573	2	3.57041e-06	0.0555556
d__Eukaryota	k__Fungi	p__Ascomycota	c__Eurotiomycetes	o__Chaetothyriales	f__Herpotrichiellaceae	g__Cladophialophora	s__unclassified_g__Cladophialophora	OTU1371	11	1.96372e-05	0.0555556
d__Eukaryota	k__Fungi	p__unclassified_k__Fungi	c__unclassified_k__Fungi	o__unclassified_k__Fungi	f__unclassified_k__Fungi	g__unclassified_k__Fungi	s__unclassified_k__Fungi	OTU1414	3	5.35561e-06	0.0555556
d__Eukaryota	k__Fungi	p__Ascomycota	c__Sordariomycetes	o__Hypocreales	f__unclassified_o__Hypocreales	g__unclassified_o__Hypocreales	s__unclassified_o__Hypocreales	OTU1444	2	3.57041e-06	0.0555556
d__Eukaryota	k__Fungi	p__Ascomycota	c__unclassified_p__Ascomycota	o__unclassified_p__Ascomycota	f__unclassified_p__Ascomycota	g__unclassified_p__Ascomycota	s__unclassified_p__Ascomycota	OTU644	28	4.99857e-05	0.0555556
d__Eukaryota	k__Fungi	p__unclassified_k__Fungi	c__unclassified_k__Fungi	o__unclassified_k__Fungi	f__unclassified_k__Fungi	g__unclassified_k__Fungi	s__unclassified_k__Fungi	OTU471	342	0.00061054	0.333333
d__Eukaryota	k__Fungi	p__Basidiomycota	c__Agaricomycetes	o__Agaricales	f__Psathyrellaceae	g__Coprinellus	s__Coprinellus_aureogranulatus	OTU753	76	0.000135676	0.111111
d__Eukaryota	k__Fungi	p__Ascomycota	c__Sordariomycetes	o__Xylariales	f__Xylariaceae	g__Xylaria	s__Xylaria_grammica	OTU1323	20	3.57041e-05	0.111111
d__Eukaryota	k__Fungi	p__Ascomycota	c__Sordariomycetes	o__Phomatosporales	f__Phomatosporaceae	g__Phomatospora	s__Phomatospora_biseriata	OTU1228	6	1.07112e-05	0.0555556
d__Eukaryota	k__Fungi	p__unclassified_k__Fungi	c__unclassified_k__Fungi	o__unclassified_k__Fungi	f__unclassified_k__Fungi	g__unclassified_k__Fungi	s__unclassified_k__Fungi	OTU1098	21	3.74893e-05	0.166667
d__Eukaryota	k__Fungi	p__Ascomycota	c__Sordariomycetes	o__Xylariales	f__Apiosporaceae	g__Arthrinium	s__Arthrinium_marii	OTU1437	1	1.7852e-06	0.0555556
d__Eukaryota	k__Fungi	p__Basidiomycota	c__Agaricomycetes	o__Trechisporales	f__unclassified_o__Trechisporales	g__unclassified_o__Trechisporales	s__unclassified_o__Trechisporales	OTU1058	2	3.57041e-06	0.0555556
d__Eukaryota	k__Fungi	p__Ascomycota	c__Dothideomycetes	o__Capnodiales	f__unclassified_o__Capnodiales	g__unclassified_o__Capnodiales	s__unclassified_o__Capnodiales	OTU433	12	2.14225e-05	0.111111
d__Eukaryota	k__Fungi	p__Ascomycota	c__Sordariomycetes	o__unclassified_c__Sordariomycetes	f__unclassified_c__Sordariomycetes	g__unclassified_c__Sordariomycetes	s__unclassified_c__Sordariomycetes	OTU364	12	2.14225e-05	0.166667
d__Eukaryota	k__Fungi	p__Basidiomycota	c__Agaricomycetes	o__Agaricales	f__Strophariaceae	g__Hypholoma	s__Hypholoma_sp	OTU1328	14	2.49929e-05	0.166667
d__Eukaryota	k__Fungi	p__Ascomycota	c__Sordariomycetes	o__unclassified_c__Sordariomycetes	f__unclassified_c__Sordariomycetes	g__unclassified_c__Sordariomycetes	s__unclassified_c__Sordariomycetes	OTU638	57	0.000101757	0.111111
d__Eukaryota	k__Fungi	p__Ascomycota	c__Dothideomycetes	o__Pleosporales	f__Didymellaceae	g__Epicoccum	s__Epicoccum_sorghinum	OTU930	2615	0.00466831	0.333333
d__Eukaryota	k__Fungi	p__Ascomycota	c__Dothideomycetes	o__Pleosporales	f__Phaeosphaeriaceae	g__Setophaeosphaeria	s__Setophaeosphaeria_badalingensis	OTU1277	32	5.71265e-05	0.0555556
d__Eukaryota	k__Fungi	p__Ascomycota	c__Arthoniomycetes	o__Arthoniales	f__Arthoniaceae	g__Arthothelium	s__Arthothelium_spectabile	OTU1154	44	7.8549e-05	0.0555556
d__Eukaryota	k__Fungi	p__Basidiomycota	c__Agaricomycetes	o__Sebacinales	f__Serendipitaceae	g__unclassified_f__Serendipitaceae	s__Serendipitaceae_sp	OTU861	40	7.14082e-05	0.0555556
d__Eukaryota	k__Fungi	p__Ascomycota	c__Sordariomycetes	o__Trichosphaeriales	f__Trichosphaeriaceae	g__Nigrospora	s__Nigrospora_sp	OTU455	9	1.60668e-05	0.0555556
d__Eukaryota	k__Fungi	p__Ascomycota	c__Leotiomycetes	o__Thelebolales	f__Pseudeurotiaceae	g__Pseudeurotium	s__Pseudeurotium_sp	OTU2014	27	4.82005e-05	0.111111
d__Eukaryota	k__Fungi	p__unclassified_k__Fungi	c__unclassified_k__Fungi	o__unclassified_k__Fungi	f__unclassified_k__Fungi	g__unclassified_k__Fungi	s__unclassified_k__Fungi	OTU913	10	1.7852e-05	0.222222
d__Eukaryota	k__Fungi	p__Glomeromycota	c__Glomeromycetes	o__Glomerales	f__Glomeraceae	g__Rhizophagus	s__Rhizophagus_sp	OTU235	7	1.24964e-05	0.0555556
d__Eukaryota	k__Fungi	p__Ascomycota	c__Sordariomycetes	o__Hypocreales	f__Clavicipitaceae	g__Collarina	s__Collarina_aurantiaca	OTU1297	3	5.35561e-06	0.0555556
d__Eukaryota	k__Fungi	p__Ascomycota	c__Sordariomycetes	o__Sordariales	f__Lasiosphaeriaceae	g__Cladorrhinum	s__Cladorrhinum_sp	OTU1395	1	1.7852e-06	0.0555556
d__Eukaryota	k__Fungi	p__Basidiomycota	c__Tremellomycetes	o__Filobasidiales	f__Filobasidiaceae	g__Heterocephalacria	s__Heterocephalacria_sp	OTU49	12	2.14225e-05	0.111111
d__Eukaryota	k__Fungi	p__Ascomycota	c__Sordariomycetes	o__Microascales	f__Ceratocystidaceae	g__unclassified_f__Ceratocystidaceae	s__unclassified_f__Ceratocystidaceae	OTU570	5739	0.0102453	0.277778
d__Eukaryota	k__Fungi	p__Ascomycota	c__Eurotiomycetes	o__Chaetothyriales	f__Cyphellophoraceae	g__Cyphellophora	s__unclassified_g__Cyphellophora	OTU487	5	8.92602e-06	0.0555556
d__Eukaryota	k__Fungi	p__Basidiomycota	c__Microbotryomycetes	o__Kriegeriales	f__unclassified_o__Kriegeriales	g__unclassified_o__Kriegeriales	s__unclassified_o__Kriegeriales	OTU1360	15	2.67781e-05	0.0555556
d__Eukaryota	k__Fungi	p__Basidiomycota	c__Agaricomycetes	o__Sebacinales	f__unclassified_o__Sebacinales	g__unclassified_o__Sebacinales	s__unclassified_o__Sebacinales	OTU1288	4	7.14082e-06	0.0555556
d__Eukaryota	k__Fungi	p__unclassified_k__Fungi	c__unclassified_k__Fungi	o__unclassified_k__Fungi	f__unclassified_k__Fungi	g__unclassified_k__Fungi	s__unclassified_k__Fungi	OTU13	7	1.24964e-05	0.277778
d__Eukaryota	k__Fungi	p__unclassified_k__Fungi	c__unclassified_k__Fungi	o__unclassified_k__Fungi	f__unclassified_k__Fungi	g__unclassified_k__Fungi	s__unclassified_k__Fungi	OTU12	4	7.14082e-06	0.111111
d__Eukaryota	k__Fungi	p__Ascomycota	c__Sordariomycetes	o__Hypocreales	f__Nectriaceae	g__Calonectria	s__unclassified_g__Calonectria	OTU1971	10479	0.0187072	0.444444
d__Eukaryota	k__Fungi	p__Ascomycota	c__Dothideomycetes	o__Pleosporales	f__Sporormiaceae	g__unclassified_f__Sporormiaceae	s__unclassified_f__Sporormiaceae	OTU883	108	0.000192802	0.166667
d__Eukaryota	k__Fungi	p__Basidiomycota	c__Agaricomycetes	o__Agaricales	f__Psathyrellaceae	g__Psathyrella	s__Psathyrella_efflorescens	OTU1426	1	1.7852e-06	0.0555556
d__Eukaryota	k__Fungi	p__Ascomycota	c__Sordariomycetes	o__Xylariales	f__Xylariaceae	g__Xylaria	s__Xylaria_curta	OTU1048	3	5.35561e-06	0.0555556
d__Eukaryota	k__Fungi	p__Ascomycota	c__Eurotiomycetes	o__Eurotiales	f__Aspergillaceae	g__Penicillium	s__Penicillium_phoeniceum	OTU938	4	7.14082e-06	0.0555556
d__Eukaryota	k__Fungi	p__Basidiomycota	c__Agaricostilbomycetes	o__Agaricostilbales	f__Chionosphaeraceae	g__unclassified_f__Chionosphaeraceae	s__unclassified_f__Chionosphaeraceae	OTU519	4	7.14082e-06	0.0555556
d__Eukaryota	k__Fungi	p__Ascomycota	c__Dothideomycetes	o__Pleosporales	f__Pleosporales_fam_Incertae_sedis	g__Fusculina	s__Fusculina_eucalypti	OTU836	2	3.57041e-06	0.0555556
d__Eukaryota	k__Fungi	p__Basidiomycota	c__Agaricomycetes	o__Auriculariales	f__unclassified_o__Auriculariales	g__unclassified_o__Auriculariales	s__Auriculariales_sp	OTU716	154	0.000274921	0.0555556
d__Eukaryota	k__Fungi	p__Ascomycota	c__Leotiomycetes	o__Helotiales	f__Helotiales_fam_Incertae_sedis	g__Rhexocercosporidium	s__Rhexocercosporidium_sp	OTU894	112	0.000199943	0.166667
d__Eukaryota	k__Fungi	p__Basidiomycota	c__Microbotryomycetes	o__Sporidiobolales	f__Sporidiobolaceae	g__Rhodotorula	s__Rhodotorula_babjevae	OTU572	204	0.000364182	0.222222
d__Eukaryota	k__Fungi	p__Basidiomycota	c__unclassified_p__Basidiomycota	o__unclassified_p__Basidiomycota	f__unclassified_p__Basidiomycota	g__unclassified_p__Basidiomycota	s__unclassified_p__Basidiomycota	OTU109	4	7.14082e-06	0.0555556
d__Eukaryota	k__Fungi	p__Ascomycota	c__Sordariomycetes	o__Hypocreales	f__Clavicipitaceae	g__Metarhizium	s__Metarhizium_marquandii	OTU1339	9	1.60668e-05	0.0555556
d__Eukaryota	k__Fungi	p__Ascomycota	c__Orbiliomycetes	o__Orbiliales	f__Orbiliaceae	g__unclassified_f__Orbiliaceae	s__unclassified_f__Orbiliaceae	OTU1097	20	3.57041e-05	0.0555556
d__Eukaryota	k__Fungi	p__Ascomycota	c__Sordariomycetes	o__Xylariales	f__Xylariaceae	g__unclassified_f__Xylariaceae	s__unclassified_f__Xylariaceae	OTU656	17	3.03485e-05	0.0555556
d__Eukaryota	k__Fungi	p__unclassified_k__Fungi	c__unclassified_k__Fungi	o__unclassified_k__Fungi	f__unclassified_k__Fungi	g__unclassified_k__Fungi	s__unclassified_k__Fungi	OTU868	1	1.7852e-06	0.0555556
d__Eukaryota	k__Fungi	p__Basidiomycota	c__Agaricomycetes	o__unclassified_c__Agaricomycetes	f__unclassified_c__Agaricomycetes	g__unclassified_c__Agaricomycetes	s__unclassified_c__Agaricomycetes	OTU1425	4	7.14082e-06	0.0555556
d__Eukaryota	k__Fungi	p__Ascomycota	c__Sordariomycetes	o__Hypocreales	f__unclassified_o__Hypocreales	g__unclassified_o__Hypocreales	s__unclassified_o__Hypocreales	OTU1454	1	1.7852e-06	0.0555556
d__Eukaryota	k__Fungi	p__Ascomycota	c__Dothideomycetes	o__Pleosporales	f__unclassified_o__Pleosporales	g__unclassified_o__Pleosporales	s__unclassified_o__Pleosporales	OTU1493	13789	0.0246162	0.611111
d__Eukaryota	k__Fungi	p__Ascomycota	c__Sordariomycetes	o__Glomerellales	f__Plectosphaerellaceae	g__Chordomyces	s__Chordomyces_antarcticus	OTU1465	2	3.57041e-06	0.0555556
d__Eukaryota	k__Fungi	p__Ascomycota	c__Sordariomycetes	o__Diaporthales	f__Diaporthaceae	g__Diaporthe	s__unclassified_g__Diaporthe	OTU1033	4	7.14082e-06	0.111111
d__Eukaryota	k__Fungi	p__Basidiomycota	c__Agaricomycetes	o__Trechisporales	f__Hydnodontaceae	g__Trechispora	s__Trechispora_sp	OTU973	3	5.35561e-06	0.0555556
d__Eukaryota	k__Fungi	p__Ascomycota	c__Dothideomycetes	o__Pleosporales	f__unclassified_o__Pleosporales	g__unclassified_o__Pleosporales	s__unclassified_o__Pleosporales	OTU425	1	1.7852e-06	0.0555556
d__Eukaryota	k__Fungi	p__Ascomycota	c__Dothideomycetes	o__Pleosporales	f__Phaeosphaeriaceae	g__unclassified_f__Phaeosphaeriaceae	s__unclassified_f__Phaeosphaeriaceae	OTU1317	1	1.7852e-06	0.0555556
d__Eukaryota	k__Fungi	p__Ascomycota	c__Eurotiomycetes	o__Chaetothyriales	f__unclassified_o__Chaetothyriales	g__unclassified_o__Chaetothyriales	s__unclassified_o__Chaetothyriales	OTU1963	2775	0.00495394	0.166667
d__Eukaryota	k__Fungi	p__Ascomycota	c__Sordariomycetes	o__Xylariales	f__Xylariaceae	g__Biscogniauxia	s__Biscogniauxia_latirima	OTU1368	4	7.14082e-06	0.0555556
d__Eukaryota	k__Fungi	p__Ascomycota	c__Dothideomycetes	o__Pleosporales	f__unclassified_o__Pleosporales	g__unclassified_o__Pleosporales	s__unclassified_o__Pleosporales	OTU833	2	3.57041e-06	0.0555556
d__Eukaryota	k__Fungi	p__Ascomycota	c__Sordariomycetes	o__Xylariales	f__Xylariaceae	g__Xylaria	s__Xylaria_venustula	OTU1423	2	3.57041e-06	0.0555556
d__Eukaryota	k__Fungi	p__Ascomycota	c__unclassified_p__Ascomycota	o__unclassified_p__Ascomycota	f__unclassified_p__Ascomycota	g__unclassified_p__Ascomycota	s__unclassified_p__Ascomycota	OTU780	185	0.000330263	0.0555556
d__Eukaryota	k__Fungi	p__Ascomycota	c__Dothideomycetes	o__Valsariales	f__Valsariaceae	g__Valsaria	s__unclassified_g__Valsaria	OTU762	1	1.7852e-06	0.0555556
d__Eukaryota	k__Fungi	p__Ascomycota	c__Eurotiomycetes	o__Chaetothyriales	f__Chaetothyriales_fam_Incertae_sedis	g__Strelitziana	s__unclassified_g__Strelitziana	OTU981	34	6.06969e-05	0.111111
d__Eukaryota	k__Fungi	p__Ascomycota	c__Eurotiomycetes	o__Eurotiales	f__Aspergillaceae	g__Aspergillus	s__unclassified_g__Aspergillus	OTU814	4	7.14082e-06	0.0555556
d__Eukaryota	k__Fungi	p__Ascomycota	c__Eurotiomycetes	o__Eurotiales	f__Aspergillaceae	g__Aspergillus	s__Aspergillus_cibarius	OTU690	1802	0.00321694	0.277778
d__Eukaryota	k__Fungi	p__Ascomycota	c__Eurotiomycetes	o__Eurotiales	f__Aspergillaceae	g__Aspergillus	s__Aspergillus_penicillioides	OTU580	142	0.000253499	0.333333
d__Eukaryota	k__Fungi	p__Ascomycota	c__Dothideomycetes	o__Pleosporales	f__Pleosporaceae	g__Bipolaris	s__Bipolaris_yamadae	OTU611	4	7.14082e-06	0.0555556
d__Eukaryota	k__Fungi	p__Basidiomycota	c__Agaricomycetes	o__Cantharellales	f__Ceratobasidiaceae	g__Rhizoctonia	s__Rhizoctonia_bicornis	OTU888	819	0.00146208	0.111111
d__Eukaryota	k__Fungi	p__Ascomycota	c__Sordariomycetes	o__Xylariales	f__unclassified_o__Xylariales	g__unclassified_o__Xylariales	s__unclassified_o__Xylariales	OTU1662	1	1.7852e-06	0.0555556
d__Eukaryota	k__Fungi	p__unclassified_k__Fungi	c__unclassified_k__Fungi	o__unclassified_k__Fungi	f__unclassified_k__Fungi	g__unclassified_k__Fungi	s__unclassified_k__Fungi	OTU646	19	3.39189e-05	0.111111
d__Eukaryota	k__Fungi	p__Ascomycota	c__Sordariomycetes	o__Xylariales	f__Xylariaceae	g__unclassified_f__Xylariaceae	s__unclassified_f__Xylariaceae	OTU1075	1	1.7852e-06	0.0555556
d__Eukaryota	k__Fungi	p__unclassified_k__Fungi	c__unclassified_k__Fungi	o__unclassified_k__Fungi	f__unclassified_k__Fungi	g__unclassified_k__Fungi	s__unclassified_k__Fungi	OTU884	1	1.7852e-06	0.0555556
d__Eukaryota	k__Fungi	p__Ascomycota	c__Eurotiomycetes	o__Chaetothyriales	f__Trichomeriaceae	g__Trichomerium	s__Trichomerium_gloeosporum	OTU1047	16	2.85633e-05	0.111111
d__Eukaryota	k__Fungi	p__Ascomycota	c__Dothideomycetes	o__Pleosporales	f__Coniothyriaceae	g__unclassified_f__Coniothyriaceae	s__unclassified_f__Coniothyriaceae	OTU535	1	1.7852e-06	0.0555556
d__Eukaryota	k__Fungi	p__Ascomycota	c__Sordariomycetes	o__unclassified_c__Sordariomycetes	f__unclassified_c__Sordariomycetes	g__unclassified_c__Sordariomycetes	s__unclassified_c__Sordariomycetes	OTU832	3	5.35561e-06	0.0555556
d__Eukaryota	k__Fungi	p__Basidiomycota	c__Tremellomycetes	o__Tremellales	f__Bulleribasidiaceae	g__Hannaella	s__Hannaella_oryzae	OTU1066	2	3.57041e-06	0.111111
d__Eukaryota	k__Fungi	p__Basidiomycota	c__Tremellomycetes	o__Tremellales	f__Bulleribasidiaceae	g__Vishniacozyma	s__Vishniacozyma_taibaiensis	OTU1156	11	1.96372e-05	0.166667
d__Eukaryota	k__Fungi	p__Ascomycota	c__Eurotiomycetes	o__Chaetothyriales	f__Chaetothyriales_fam_Incertae_sedis	g__unclassified_f__Chaetothyriales_fam_Incertae_sedis	s__unclassified_f__Chaetothyriales_fam_Incertae_sedis	OTU1478	6	1.07112e-05	0.0555556
d__Eukaryota	k__Fungi	p__Ascomycota	c__Eurotiomycetes	o__Chaetothyriales	f__Herpotrichiellaceae	g__Cladophialophora	s__Cladophialophora_sp	OTU1467	3	5.35561e-06	0.0555556
d__Eukaryota	k__Fungi	p__Ascomycota	c__unclassified_p__Ascomycota	o__unclassified_p__Ascomycota	f__unclassified_p__Ascomycota	g__unclassified_p__Ascomycota	s__unclassified_p__Ascomycota	OTU948	12	2.14225e-05	0.0555556
d__Eukaryota	k__Fungi	p__Ascomycota	c__Sordariomycetes	o__Sordariales	f__Chaetomiaceae	g__Gilmaniella	s__Gilmaniella_subornata	OTU727	1	1.7852e-06	0.0555556
d__Eukaryota	k__Fungi	p__Basidiomycota	c__Agaricomycetes	o__Russulales	f__Peniophoraceae	g__Peniophora	s__Peniophora_sp	OTU695	88	0.000157098	0.0555556
d__Eukaryota	k__Fungi	p__Ascomycota	c__Sordariomycetes	o__Xylariales	f__Apiosporaceae	g__Arthrinium	s__Arthrinium_sp	OTU214	12	2.14225e-05	0.0555556
d__Eukaryota	k__Fungi	p__Ascomycota	c__Eurotiomycetes	o__Chaetothyriales	f__Herpotrichiellaceae	g__Cladophialophora	s__unclassified_g__Cladophialophora	OTU490	28	4.99857e-05	0.0555556
d__Eukaryota	k__Fungi	p__Ascomycota	c__Sordariomycetes	o__Xylariales	f__Apiosporaceae	g__Arthrinium	s__unclassified_g__Arthrinium	OTU1110	1	1.7852e-06	0.0555556
d__Eukaryota	k__Fungi	p__Ascomycota	c__Sordariomycetes	o__Sordariales	f__Chaetomiaceae	g__Chaetomium	s__unclassified_g__Chaetomium	OTU737	28	4.99857e-05	0.0555556
d__Eukaryota	k__Fungi	p__Ascomycota	c__Sordariomycetes	o__Hypocreales	f__Nectriaceae	g__Paracremonium	s__Paracremonium_sp	OTU911	176	0.000314196	0.5
d__Eukaryota	k__Fungi	p__Ascomycota	c__Sordariomycetes	o__Xylariales	f__Xylariaceae	g__Hypoxylon	s__unclassified_g__Hypoxylon	OTU2113	9	1.60668e-05	0.166667
d__Eukaryota	k__Fungi	p__Basidiomycota	c__Tremellomycetes	o__Filobasidiales	f__Filobasidiaceae	g__Filobasidium	s__Filobasidium_wieringae	OTU1422	3	5.35561e-06	0.0555556
d__Eukaryota	k__Fungi	p__Ascomycota	c__Dothideomycetes	o__Pleosporales	f__Phaeosphaeriaceae	g__unclassified_f__Phaeosphaeriaceae	s__unclassified_f__Phaeosphaeriaceae	OTU2087	2	3.57041e-06	0.0555556
d__Eukaryota	k__Fungi	p__Ascomycota	c__Dothideomycetes	o__Pleosporales	f__Phaeosphaeriaceae	g__unclassified_f__Phaeosphaeriaceae	s__unclassified_f__Phaeosphaeriaceae	OTU2084	76	0.000135676	0.277778
d__Eukaryota	k__Fungi	p__Ascomycota	c__Sordariomycetes	o__Xylariales	f__Xylariaceae	g__Xylaria	s__Xylaria_bambusicola	OTU1717	7	1.24964e-05	0.0555556
d__Eukaryota	k__Fungi	p__Ascomycota	c__Sordariomycetes	o__Hypocreales	f__Bionectriaceae	g__Clonostachys	s__Clonostachys_rogersoniana	OTU1105	15	2.67781e-05	0.111111
d__Eukaryota	k__Fungi	p__unclassified_k__Fungi	c__unclassified_k__Fungi	o__unclassified_k__Fungi	f__unclassified_k__Fungi	g__unclassified_k__Fungi	s__unclassified_k__Fungi	OTU851	28	4.99857e-05	0.166667
d__Eukaryota	k__Fungi	p__unclassified_k__Fungi	c__unclassified_k__Fungi	o__unclassified_k__Fungi	f__unclassified_k__Fungi	g__unclassified_k__Fungi	s__unclassified_k__Fungi	OTU856	2	3.57041e-06	0.111111
d__Eukaryota	k__Fungi	p__Basidiomycota	c__Agaricomycetes	o__Agaricales	f__Psathyrellaceae	g__Psathyrella	s__Psathyrella_candolleana	OTU934	3	5.35561e-06	0.0555556
d__Eukaryota	k__Fungi	p__unclassified_k__Fungi	c__unclassified_k__Fungi	o__unclassified_k__Fungi	f__unclassified_k__Fungi	g__unclassified_k__Fungi	s__unclassified_k__Fungi	OTU858	10	1.7852e-05	0.0555556
d__Eukaryota	k__Fungi	p__Ascomycota	c__Sordariomycetes	o__Xylariales	f__Xylariaceae	g__Xylaria	s__Xylaria_brevipes	OTU1347	2	3.57041e-06	0.0555556
d__Eukaryota	k__Fungi	p__Basidiomycota	c__Agaricomycetes	o__Boletales	f__Coniophoraceae	g__Gyrodontium	s__Gyrodontium_sacchari	OTU1165	3	5.35561e-06	0.0555556
d__Eukaryota	k__Fungi	p__Ascomycota	c__Eurotiomycetes	o__Chaetothyriales	f__unclassified_o__Chaetothyriales	g__unclassified_o__Chaetothyriales	s__unclassified_o__Chaetothyriales	OTU1114	248	0.000442731	0.166667
d__Eukaryota	k__Fungi	p__Ascomycota	c__Sordariomycetes	o__Trichosphaeriales	f__Trichosphaeriaceae	g__Nigrospora	s__Nigrospora_oryzae	OTU143	52	9.28306e-05	0.222222
d__Eukaryota	k__Fungi	p__Mortierellomycota	c__Mortierellomycetes	o__Mortierellales	f__Mortierellaceae	g__Mortierella	s__Mortierella_elongata	OTU1932	2	3.57041e-06	0.0555556
d__Eukaryota	k__Fungi	p__Ascomycota	c__Dothideomycetes	o__Pleosporales	f__unclassified_o__Pleosporales	g__unclassified_o__Pleosporales	s__unclassified_o__Pleosporales	OTU1272	8	1.42816e-05	0.0555556
d__Eukaryota	k__Fungi	p__Ascomycota	c__Dothideomycetes	o__Pleosporales	f__Didymosphaeriaceae	g__Montagnula	s__unclassified_g__Montagnula	OTU1031	10	1.7852e-05	0.0555556
d__Eukaryota	k__Fungi	p__Ascomycota	c__Dothideomycetes	o__Pleosporales	f__Didymosphaeriaceae	g__Tremateia	s__Tremateia_sp	OTU2108	1	1.7852e-06	0.0555556
d__Eukaryota	k__Fungi	p__Ascomycota	c__Leotiomycetes	o__Helotiales	f__Chaetomellaceae	g__Chaetomella	s__Chaetomella_raphigera	OTU650	2466	0.00440231	0.388889
d__Eukaryota	k__Fungi	p__Ascomycota	c__Dothideomycetes	o__Hysteriales	f__Hysteriaceae	g__Rhytidhysteron	s__Rhytidhysteron_thailandicum	OTU2035	1	1.7852e-06	0.0555556
d__Eukaryota	k__Fungi	p__Ascomycota	c__unclassified_p__Ascomycota	o__unclassified_p__Ascomycota	f__unclassified_p__Ascomycota	g__unclassified_p__Ascomycota	s__unclassified_p__Ascomycota	OTU1086	16	2.85633e-05	0.0555556
d__Eukaryota	k__Fungi	p__Ascomycota	c__unclassified_p__Ascomycota	o__unclassified_p__Ascomycota	f__unclassified_p__Ascomycota	g__unclassified_p__Ascomycota	s__unclassified_p__Ascomycota	OTU1087	8	1.42816e-05	0.166667
d__Eukaryota	k__Fungi	p__Ascomycota	c__unclassified_p__Ascomycota	o__unclassified_p__Ascomycota	f__unclassified_p__Ascomycota	g__unclassified_p__Ascomycota	s__unclassified_p__Ascomycota	OTU1084	1	1.7852e-06	0.0555556
d__Eukaryota	k__Fungi	p__Ascomycota	c__unclassified_p__Ascomycota	o__unclassified_p__Ascomycota	f__unclassified_p__Ascomycota	g__unclassified_p__Ascomycota	s__unclassified_p__Ascomycota	OTU1311	2	3.57041e-06	0.0555556
d__Eukaryota	k__Fungi	p__Basidiomycota	c__Agaricomycetes	o__Polyporales	f__unclassified_o__Polyporales	g__unclassified_o__Polyporales	s__unclassified_o__Polyporales	OTU1123	1	1.7852e-06	0.0555556
d__Eukaryota	k__Fungi	p__Ascomycota	c__Dothideomycetes	o__Pleosporales	f__Sporormiaceae	g__unclassified_f__Sporormiaceae	s__unclassified_f__Sporormiaceae	OTU672	33	5.89117e-05	0.222222
d__Eukaryota	k__Fungi	p__Ascomycota	c__unclassified_p__Ascomycota	o__unclassified_p__Ascomycota	f__unclassified_p__Ascomycota	g__unclassified_p__Ascomycota	s__unclassified_p__Ascomycota	OTU1264	2	3.57041e-06	0.0555556
d__Eukaryota	k__Fungi	p__Basidiomycota	c__Agaricomycetes	o__unclassified_c__Agaricomycetes	f__unclassified_c__Agaricomycetes	g__unclassified_c__Agaricomycetes	s__unclassified_c__Agaricomycetes	OTU1251	4	7.14082e-06	0.0555556
d__Eukaryota	k__Fungi	p__Basidiomycota	c__Cystobasidiomycetes	o__Cystobasidiomycetes_ord_Incertae_sedis	f__Symmetrosporaceae	g__Symmetrospora	s__Symmetrospora_symmetrica	OTU719	169	0.0003017	0.0555556
d__Eukaryota	k__Fungi	p__Ascomycota	c__Sordariomycetes	o__Hypocreales	f__Bionectriaceae	g__unclassified_f__Bionectriaceae	s__unclassified_f__Bionectriaceae	OTU1230	8	1.42816e-05	0.0555556
d__Eukaryota	k__Fungi	p__Ascomycota	c__Saccharomycetes	o__Saccharomycetales	f__Saccharomycetales_fam_Incertae_sedis	g__Diutina	s__Diutina_neorugosa	OTU1076	13	2.32077e-05	0.111111
d__Eukaryota	k__Fungi	p__Ascomycota	c__Dothideomycetes	o__Pleosporales	f__unclassified_o__Pleosporales	g__unclassified_o__Pleosporales	s__unclassified_o__Pleosporales	OTU378	35	6.24821e-05	0.277778
d__Eukaryota	k__Fungi	p__Ascomycota	c__Dothideomycetes	o__Pleosporales	f__Teichosporaceae	g__Teichospora	s__unclassified_g__Teichospora	OTU1238	3	5.35561e-06	0.0555556
d__Eukaryota	k__Fungi	p__Ascomycota	c__Sordariomycetes	o__Hypocreales	f__Hypocreales_fam_Incertae_sedis	g__Ustilaginoidea	s__Ustilaginoidea_sp	OTU2024	36	6.42674e-05	0.166667
d__Eukaryota	k__Fungi	p__Ascomycota	c__Sordariomycetes	o__Diaporthales	f__Diaporthaceae	g__Diaporthe	s__unclassified_g__Diaporthe	OTU1189	182	0.000324907	0.222222
d__Eukaryota	k__Fungi	p__unclassified_k__Fungi	c__unclassified_k__Fungi	o__unclassified_k__Fungi	f__unclassified_k__Fungi	g__unclassified_k__Fungi	s__unclassified_k__Fungi	OTU586	125	0.000223151	0.111111
d__Eukaryota	k__Fungi	p__Ascomycota	c__Dothideomycetes	o__Pleosporales	f__Dictyosporiaceae	g__Dictyocheirospora	s__Dictyocheirospora_garethjonesii	OTU1372	2	3.57041e-06	0.0555556
d__Eukaryota	k__Fungi	p__Ascomycota	c__Sordariomycetes	o__Xylariales	f__unclassified_o__Xylariales	g__unclassified_o__Xylariales	s__unclassified_o__Xylariales	OTU557	5	8.92602e-06	0.0555556
d__Eukaryota	k__Fungi	p__unclassified_k__Fungi	c__unclassified_k__Fungi	o__unclassified_k__Fungi	f__unclassified_k__Fungi	g__unclassified_k__Fungi	s__unclassified_k__Fungi	OTU1432	2	3.57041e-06	0.0555556
d__Eukaryota	k__Fungi	p__Ascomycota	c__Dothideomycetes	o__Capnodiales	f__Mycosphaerellaceae	g__unclassified_f__Mycosphaerellaceae	s__unclassified_f__Mycosphaerellaceae	OTU822	19	3.39189e-05	0.0555556
d__Eukaryota	k__Fungi	p__Ascomycota	c__Dothideomycetes	o__Pleosporales	f__Lophiotremataceae	g__Lophiotrema	s__Lophiotrema_sp	OTU2098	613	0.00109433	0.277778
d__Eukaryota	k__Fungi	p__Ascomycota	c__Sordariomycetes	o__unclassified_c__Sordariomycetes	f__unclassified_c__Sordariomycetes	g__unclassified_c__Sordariomycetes	s__unclassified_c__Sordariomycetes	OTU1290	2	3.57041e-06	0.0555556
d__Eukaryota	k__Fungi	p__Ascomycota	c__Leotiomycetes	o__Helotiales	f__Hyaloscyphaceae	g__Rodwayella	s__Rodwayella_sessilis	OTU1104	2	3.57041e-06	0.0555556
d__Eukaryota	k__Fungi	p__Ascomycota	c__Eurotiomycetes	o__Chaetothyriales	f__Cyphellophoraceae	g__Cyphellophora	s__unclassified_g__Cyphellophora	OTU1191	53	9.46158e-05	0.222222
d__Eukaryota	k__Fungi	p__Ascomycota	c__Sordariomycetes	o__Hypocreales	f__Nectriaceae	g__Penicillifer	s__unclassified_g__Penicillifer	OTU908	7970	0.0142281	0.111111
d__Eukaryota	k__Fungi	p__Ascomycota	c__Sordariomycetes	o__Hypocreales	f__Nectriaceae	g__Fusicolla	s__Fusicolla_aquaeductuum	OTU1016	11	1.96372e-05	0.0555556
d__Eukaryota	k__Fungi	p__Basidiomycota	c__Exobasidiomycetes	o__unclassified_c__Exobasidiomycetes	f__unclassified_c__Exobasidiomycetes	g__unclassified_c__Exobasidiomycetes	s__Exobasidiomycetes_sp	OTU1235	2	3.57041e-06	0.0555556
d__Eukaryota	k__Fungi	p__Ascomycota	c__Sordariomycetes	o__Glomerellales	f__Glomerellaceae	g__Colletotrichum	s__unclassified_g__Colletotrichum	OTU640	18998	0.0339153	0.611111
d__Eukaryota	k__Fungi	p__Ascomycota	c__Sordariomycetes	o__Xylariales	f__Xylariaceae	g__Hypoxylon	s__Hypoxylon_laminosum	OTU1008	22	3.92745e-05	0.166667
d__Eukaryota	k__Fungi	p__Ascomycota	c__Sordariomycetes	o__Hypocreales	f__Clavicipitaceae	g__Metapochonia	s__Metapochonia_bulbillosa	OTU1329	452	0.000806912	0.111111
d__Eukaryota	k__Fungi	p__Ascomycota	c__Dothideomycetes	o__Pleosporales	f__Phaeosphaeriaceae	g__Leptospora	s__Leptospora_sp	OTU785	67	0.000119609	0.111111
d__Eukaryota	k__Fungi	p__Ascomycota	c__Eurotiomycetes	o__Eurotiales	f__Aspergillaceae	g__Aspergillus	s__unclassified_g__Aspergillus	OTU862	10	1.7852e-05	0.0555556
d__Eukaryota	k__Fungi	p__Ascomycota	c__unclassified_p__Ascomycota	o__unclassified_p__Ascomycota	f__unclassified_p__Ascomycota	g__unclassified_p__Ascomycota	s__unclassified_p__Ascomycota	OTU919	73	0.00013032	0.0555556
d__Eukaryota	k__Fungi	p__Basidiomycota	c__Agaricomycetes	o__Polyporales	f__Hyphodermataceae	g__Hyphoderma	s__Hyphoderma_sp	OTU563	7	1.24964e-05	0.0555556
d__Eukaryota	k__Fungi	p__unclassified_k__Fungi	c__unclassified_k__Fungi	o__unclassified_k__Fungi	f__unclassified_k__Fungi	g__unclassified_k__Fungi	s__unclassified_k__Fungi	OTU678	6	1.07112e-05	0.0555556
d__Eukaryota	k__Fungi	p__unclassified_k__Fungi	c__unclassified_k__Fungi	o__unclassified_k__Fungi	f__unclassified_k__Fungi	g__unclassified_k__Fungi	s__unclassified_k__Fungi	OTU674	7	1.24964e-05	0.0555556
d__Eukaryota	k__Fungi	p__unclassified_k__Fungi	c__unclassified_k__Fungi	o__unclassified_k__Fungi	f__unclassified_k__Fungi	g__unclassified_k__Fungi	s__unclassified_k__Fungi	OTU675	23	4.10597e-05	0.0555556
d__Eukaryota	k__Fungi	p__unclassified_k__Fungi	c__unclassified_k__Fungi	o__unclassified_k__Fungi	f__unclassified_k__Fungi	g__unclassified_k__Fungi	s__unclassified_k__Fungi	OTU676	7	1.24964e-05	0.0555556
d__Eukaryota	k__Fungi	p__unclassified_k__Fungi	c__unclassified_k__Fungi	o__unclassified_k__Fungi	f__unclassified_k__Fungi	g__unclassified_k__Fungi	s__unclassified_k__Fungi	OTU677	35	6.24821e-05	0.0555556
d__Eukaryota	k__Fungi	p__unclassified_k__Fungi	c__unclassified_k__Fungi	o__unclassified_k__Fungi	f__unclassified_k__Fungi	g__unclassified_k__Fungi	s__unclassified_k__Fungi	OTU671	50	8.92602e-05	0.111111
d__Eukaryota	k__Fungi	p__unclassified_k__Fungi	c__unclassified_k__Fungi	o__unclassified_k__Fungi	f__unclassified_k__Fungi	g__unclassified_k__Fungi	s__unclassified_k__Fungi	OTU673	28	4.99857e-05	0.0555556
d__Eukaryota	k__Fungi	p__Ascomycota	c__Sordariomycetes	o__unclassified_c__Sordariomycetes	f__unclassified_c__Sordariomycetes	g__unclassified_c__Sordariomycetes	s__unclassified_c__Sordariomycetes	OTU132	5	8.92602e-06	0.111111
d__Eukaryota	k__Fungi	p__Ascomycota	c__Sordariomycetes	o__unclassified_c__Sordariomycetes	f__unclassified_c__Sordariomycetes	g__unclassified_c__Sordariomycetes	s__unclassified_c__Sordariomycetes	OTU133	2	3.57041e-06	0.0555556
d__Eukaryota	k__Fungi	p__Ascomycota	c__Sordariomycetes	o__Hypocreales	f__Cordycipitaceae	g__Simplicillium	s__Simplicillium_sp	OTU610	23	4.10597e-05	0.0555556
d__Eukaryota	k__Fungi	p__Ascomycota	c__Eurotiomycetes	o__Chaetothyriales	f__Herpotrichiellaceae	g__Cladophialophora	s__Cladophialophora_sp	OTU1113	258	0.000460583	0.166667
d__Eukaryota	k__Fungi	p__Basidiomycota	c__unclassified_p__Basidiomycota	o__unclassified_p__Basidiomycota	f__unclassified_p__Basidiomycota	g__unclassified_p__Basidiomycota	s__unclassified_p__Basidiomycota	OTU808	1	1.7852e-06	0.0555556
d__Eukaryota	k__Fungi	p__Ascomycota	c__Dothideomycetes	o__Pleosporales	f__Pleosporales_fam_Incertae_sedis	g__Nigrograna	s__Nigrograna_cangshanensis	OTU1157	1	1.7852e-06	0.0555556
d__Eukaryota	k__Fungi	p__Ascomycota	c__Sordariomycetes	o__Hypocreales	f__Hypocreales_fam_Incertae_sedis	g__Acremonium	s__unclassified_g__Acremonium	OTU1309	7	1.24964e-05	0.0555556
d__Eukaryota	k__Fungi	p__Ascomycota	c__Eurotiomycetes	o__Chaetothyriales	f__Herpotrichiellaceae	g__unclassified_f__Herpotrichiellaceae	s__unclassified_f__Herpotrichiellaceae	OTU368	5	8.92602e-06	0.0555556
d__Eukaryota	k__Fungi	p__Ascomycota	c__unclassified_p__Ascomycota	o__unclassified_p__Ascomycota	f__unclassified_p__Ascomycota	g__unclassified_p__Ascomycota	s__unclassified_p__Ascomycota	OTU128	862	0.00153885	0.333333
d__Eukaryota	k__Fungi	p__Ascomycota	c__Dothideomycetes	o__Pleosporales	f__Tetraplosphaeriaceae	g__Polyplosphaeria	s__Polyplosphaeria_fusca	OTU1435	1	1.7852e-06	0.0555556
d__Eukaryota	k__Fungi	p__Ascomycota	c__Eurotiomycetes	o__Chaetothyriales	f__Herpotrichiellaceae	g__unclassified_f__Herpotrichiellaceae	s__unclassified_f__Herpotrichiellaceae	OTU1040	107	0.000191017	0.166667
d__Eukaryota	k__Fungi	p__Ascomycota	c__Eurotiomycetes	o__Eurotiales	f__Aspergillaceae	g__Penicillium	s__Penicillium_ochrochloron	OTU864	33	5.89117e-05	0.0555556
d__Eukaryota	k__Fungi	p__Ascomycota	c__Sordariomycetes	o__Hypocreales	f__Hypocreaceae	g__Trichoderma	s__unclassified_g__Trichoderma	OTU953	2	3.57041e-06	0.0555556
d__Eukaryota	k__Fungi	p__Ascomycota	c__Dothideomycetes	o__Pleosporales	f__Pleosporales_fam_Incertae_sedis	g__Dokmaia	s__Dokmaia_monthadangi	OTU2008	1	1.7852e-06	0.0555556
d__Eukaryota	k__Fungi	p__Ascomycota	c__Sordariomycetes	o__Xylariales	f__Xylariaceae	g__unclassified_f__Xylariaceae	s__unclassified_f__Xylariaceae	OTU982	5	8.92602e-06	0.111111
d__Eukaryota	k__Fungi	p__Ascomycota	c__Dothideomycetes	o__Pleosporales	f__Sporormiaceae	g__Sporormiella	s__Sporormiella_minima	OTU1522	4312	0.0076978	0.277778
d__Eukaryota	k__Fungi	p__Ascomycota	c__unclassified_p__Ascomycota	o__unclassified_p__Ascomycota	f__unclassified_p__Ascomycota	g__unclassified_p__Ascomycota	s__unclassified_p__Ascomycota	OTU1029	5	8.92602e-06	0.111111
d__Eukaryota	k__Fungi	p__Ascomycota	c__Leotiomycetes	o__Helotiales	f__unclassified_o__Helotiales	g__unclassified_o__Helotiales	s__unclassified_o__Helotiales	OTU1275	16	2.85633e-05	0.0555556
d__Eukaryota	k__Fungi	p__Ascomycota	c__unclassified_p__Ascomycota	o__unclassified_p__Ascomycota	f__unclassified_p__Ascomycota	g__unclassified_p__Ascomycota	s__unclassified_p__Ascomycota	OTU1322	4	7.14082e-06	0.0555556
d__Eukaryota	k__Fungi	p__Ascomycota	c__Dothideomycetes	o__Capnodiales	f__Cladosporiaceae	g__Rachicladosporium	s__Rachicladosporium_sp	OTU1194	49	8.7475e-05	0.166667
d__Eukaryota	k__Fungi	p__Ascomycota	c__Eurotiomycetes	o__Chaetothyriales	f__Herpotrichiellaceae	g__unclassified_f__Herpotrichiellaceae	s__unclassified_f__Herpotrichiellaceae	OTU106	253	0.000451657	0.222222
d__Eukaryota	k__Fungi	p__Ascomycota	c__unclassified_p__Ascomycota	o__unclassified_p__Ascomycota	f__unclassified_p__Ascomycota	g__unclassified_p__Ascomycota	s__unclassified_p__Ascomycota	OTU1259	38	6.78378e-05	0.0555556
d__Eukaryota	k__Fungi	p__Basidiomycota	c__Agaricomycetes	o__unclassified_c__Agaricomycetes	f__unclassified_c__Agaricomycetes	g__unclassified_c__Agaricomycetes	s__unclassified_c__Agaricomycetes	OTU1229	2	3.57041e-06	0.0555556
d__Eukaryota	k__Fungi	p__Ascomycota	c__Dothideomycetes	o__Pleosporales	f__Periconiaceae	g__Periconia	s__unclassified_g__Periconia	OTU1021	3	5.35561e-06	0.0555556
d__Eukaryota	k__Fungi	p__Ascomycota	c__Sordariomycetes	o__Xylariales	f__Xylariales_fam_Incertae_sedis	g__Ceratostomella	s__Ceratostomella_cuspidata	OTU770	6	1.07112e-05	0.0555556
d__Eukaryota	k__Fungi	p__Ascomycota	c__Eurotiomycetes	o__Chaetothyriales	f__Trichomeriaceae	g__unclassified_f__Trichomeriaceae	s__Trichomeriaceae_sp	OTU1090	2269	0.00405063	0.166667
d__Eukaryota	k__Fungi	p__Ascomycota	c__Eurotiomycetes	o__Chaetothyriales	f__Herpotrichiellaceae	g__Exophiala	s__unclassified_g__Exophiala	OTU1181	126	0.000224936	0.166667
d__Eukaryota	k__Fungi	p__Ascomycota	c__Dothideomycetes	o__Pleosporales	f__Lophiotremataceae	g__Lophiotrema	s__Lophiotrema_sp	OTU1471	4	7.14082e-06	0.0555556
d__Eukaryota	k__Fungi	p__unclassified_k__Fungi	c__unclassified_k__Fungi	o__unclassified_k__Fungi	f__unclassified_k__Fungi	g__unclassified_k__Fungi	s__unclassified_k__Fungi	OTU1924	2	3.57041e-06	0.111111
d__Eukaryota	k__Fungi	p__Ascomycota	c__Sordariomycetes	o__Hypocreales	f__Nectriaceae	g__Cylindrocarpon	s__Cylindrocarpon_sp	OTU853	111	0.000198158	0.0555556
d__Eukaryota	k__Fungi	p__Ascomycota	c__Dothideomycetes	o__Pleosporales	f__Phaeosphaeriaceae	g__Setophoma	s__Setophoma_sp	OTU2028	136	0.000242788	0.166667
d__Eukaryota	k__Fungi	p__Ascomycota	c__Saccharomycetes	o__Saccharomycetales	f__Pichiaceae	g__Pichia	s__Pichia_kluyveri	OTU1063	1	1.7852e-06	0.0555556
d__Eukaryota	k__Fungi	p__Ascomycota	c__Dothideomycetes	o__Pleosporales	f__Periconiaceae	g__Periconia	s__Periconia_sp	OTU1180	16	2.85633e-05	0.111111
d__Eukaryota	k__Fungi	p__Ascomycota	c__unclassified_p__Ascomycota	o__unclassified_p__Ascomycota	f__unclassified_p__Ascomycota	g__unclassified_p__Ascomycota	s__unclassified_p__Ascomycota	OTU1411	3	5.35561e-06	0.111111
d__Eukaryota	k__Fungi	p__Ascomycota	c__Eurotiomycetes	o__Eurotiales	f__Aspergillaceae	g__Penicillium	s__Penicillium_sclerotiorum	OTU1378	42	7.49786e-05	0.111111
d__Eukaryota	k__Fungi	p__Ascomycota	c__Dothideomycetes	o__Capnodiales	f__Mycosphaerellaceae	g__Pseudocercospora	s__unclassified_g__Pseudocercospora	OTU805	864	0.00154242	0.222222
d__Eukaryota	k__Fungi	p__Basidiomycota	c__Tremellomycetes	o__Cystofilobasidiales	f__Mrakiaceae	g__Mrakia	s__Mrakia_blollopis	OTU900	42	7.49786e-05	0.0555556
d__Eukaryota	k__Fungi	p__Ascomycota	c__Sordariomycetes	o__Xylariales	f__Xylariaceae	g__unclassified_f__Xylariaceae	s__unclassified_f__Xylariaceae	OTU1585	7	1.24964e-05	0.0555556
d__Eukaryota	k__Fungi	p__Ascomycota	c__Eurotiomycetes	o__Eurotiales	f__Aspergillaceae	g__Aspergillus	s__Aspergillus_penicillioides	OTU1598	47	8.39046e-05	0.111111
d__Eukaryota	k__Fungi	p__unclassified_k__Fungi	c__unclassified_k__Fungi	o__unclassified_k__Fungi	f__unclassified_k__Fungi	g__unclassified_k__Fungi	s__unclassified_k__Fungi	OTU665	65	0.000116038	0.0555556
d__Eukaryota	k__Fungi	p__Ascomycota	c__Eurotiomycetes	o__Eurotiales	f__Aspergillaceae	g__Aspergillus	s__unclassified_g__Aspergillus	OTU873	13	2.32077e-05	0.111111
d__Eukaryota	k__Fungi	p__Ascomycota	c__Eurotiomycetes	o__Chaetothyriales	f__Herpotrichiellaceae	g__unclassified_f__Herpotrichiellaceae	s__unclassified_f__Herpotrichiellaceae	OTU977	453	0.000808698	0.166667
d__Eukaryota	k__Fungi	p__Ascomycota	c__Sordariomycetes	o__Glomerellales	f__Plectosphaerellaceae	g__unclassified_f__Plectosphaerellaceae	s__unclassified_f__Plectosphaerellaceae	OTU799	8	1.42816e-05	0.0555556
d__Eukaryota	k__Fungi	p__Ascomycota	c__Dothideomycetes	o__Pleosporales	f__Pleosporales_fam_Incertae_sedis	g__Microsphaeropsis	s__Microsphaeropsis_arundinis	OTU1356	3	5.35561e-06	0.0555556
d__Eukaryota	k__Fungi	p__Ascomycota	c__Sordariomycetes	o__Xylariales	f__unclassified_o__Xylariales	g__unclassified_o__Xylariales	s__unclassified_o__Xylariales	OTU1044	4	7.14082e-06	0.0555556
d__Eukaryota	k__Fungi	p__unclassified_k__Fungi	c__unclassified_k__Fungi	o__unclassified_k__Fungi	f__unclassified_k__Fungi	g__unclassified_k__Fungi	s__unclassified_k__Fungi	OTU663	9	1.60668e-05	0.0555556
d__Eukaryota	k__Fungi	p__unclassified_k__Fungi	c__unclassified_k__Fungi	o__unclassified_k__Fungi	f__unclassified_k__Fungi	g__unclassified_k__Fungi	s__unclassified_k__Fungi	OTU662	20	3.57041e-05	0.0555556
d__Eukaryota	k__Fungi	p__unclassified_k__Fungi	c__unclassified_k__Fungi	o__unclassified_k__Fungi	f__unclassified_k__Fungi	g__unclassified_k__Fungi	s__unclassified_k__Fungi	OTU661	33	5.89117e-05	0.0555556
d__Eukaryota	k__Fungi	p__unclassified_k__Fungi	c__unclassified_k__Fungi	o__unclassified_k__Fungi	f__unclassified_k__Fungi	g__unclassified_k__Fungi	s__unclassified_k__Fungi	OTU667	13	2.32077e-05	0.0555556
d__Eukaryota	k__Fungi	p__Ascomycota	c__Eurotiomycetes	o__Chaetothyriales	f__Cyphellophoraceae	g__Cyphellophora	s__Cyphellophora_pauciseptata	OTU824	27	4.82005e-05	0.111111
d__Eukaryota	k__Fungi	p__unclassified_k__Fungi	c__unclassified_k__Fungi	o__unclassified_k__Fungi	f__unclassified_k__Fungi	g__unclassified_k__Fungi	s__unclassified_k__Fungi	OTU664	37	6.60526e-05	0.222222
d__Eukaryota	k__Fungi	p__unclassified_k__Fungi	c__unclassified_k__Fungi	o__unclassified_k__Fungi	f__unclassified_k__Fungi	g__unclassified_k__Fungi	s__unclassified_k__Fungi	OTU669	37	6.60526e-05	0.166667
d__Eukaryota	k__Fungi	p__unclassified_k__Fungi	c__unclassified_k__Fungi	o__unclassified_k__Fungi	f__unclassified_k__Fungi	g__unclassified_k__Fungi	s__unclassified_k__Fungi	OTU668	13	2.32077e-05	0.0555556
d__Eukaryota	k__Fungi	p__Ascomycota	c__Sordariomycetes	o__Xylariales	f__unclassified_o__Xylariales	g__unclassified_o__Xylariales	s__unclassified_o__Xylariales	OTU1196	15	2.67781e-05	0.166667
d__Eukaryota	k__Fungi	p__Basidiomycota	c__Agaricomycetes	o__Cantharellales	f__Botryobasidiaceae	g__Botryohypochnus	s__Botryohypochnus_sp	OTU1316	3	5.35561e-06	0.0555556
d__Eukaryota	k__Fungi	p__Ascomycota	c__Pezizomycetes	o__Pezizales	f__Pezizaceae	g__Oedocephalum	s__Oedocephalum_sp	OTU597	7	1.24964e-05	0.0555556
d__Eukaryota	k__Fungi	p__Basidiomycota	c__Agaricomycetes	o__Agaricales	f__Strophariaceae	g__Hypholoma	s__Hypholoma_sp	OTU1015	6	1.07112e-05	0.166667
d__Eukaryota	k__Fungi	p__Ascomycota	c__Sordariomycetes	o__unclassified_c__Sordariomycetes	f__unclassified_c__Sordariomycetes	g__unclassified_c__Sordariomycetes	s__unclassified_c__Sordariomycetes	OTU1353	1	1.7852e-06	0.0555556
d__Eukaryota	k__Fungi	p__Ascomycota	c__Sordariomycetes	o__Xylariales	f__Xylariaceae	g__Digitodochium	s__Digitodochium_rhodoleucum	OTU1148	5	8.92602e-06	0.222222
d__Eukaryota	k__Fungi	p__Ascomycota	c__Eurotiomycetes	o__Chaetothyriales	f__Herpotrichiellaceae	g__Exophiala	s__Exophiala_pisciphila	OTU925	824	0.00147101	0.277778
d__Eukaryota	k__Fungi	p__Ascomycota	c__Sordariomycetes	o__Diaporthales	f__Diaporthaceae	g__Diaporthe	s__unclassified_g__Diaporthe	OTU1172	16	2.85633e-05	0.111111
d__Eukaryota	k__Fungi	p__unclassified_k__Fungi	c__unclassified_k__Fungi	o__unclassified_k__Fungi	f__unclassified_k__Fungi	g__unclassified_k__Fungi	s__unclassified_k__Fungi	OTU595	18	3.21337e-05	0.0555556
d__Eukaryota	k__Fungi	p__Ascomycota	c__Sordariomycetes	o__unclassified_c__Sordariomycetes	f__unclassified_c__Sordariomycetes	g__unclassified_c__Sordariomycetes	s__unclassified_c__Sordariomycetes	OTU658	21	3.74893e-05	0.0555556
d__Eukaryota	k__Fungi	p__Ascomycota	c__Sordariomycetes	o__unclassified_c__Sordariomycetes	f__unclassified_c__Sordariomycetes	g__unclassified_c__Sordariomycetes	s__unclassified_c__Sordariomycetes	OTU654	8	1.42816e-05	0.0555556
d__Eukaryota	k__Fungi	p__Basidiomycota	c__Tremellomycetes	o__Trichosporonales	f__Trichosporonaceae	g__Apiotrichum	s__Apiotrichum_montevideense	OTU874	6	1.07112e-05	0.111111
d__Eukaryota	k__Fungi	p__Ascomycota	c__Sordariomycetes	o__unclassified_c__Sordariomycetes	f__unclassified_c__Sordariomycetes	g__unclassified_c__Sordariomycetes	s__unclassified_c__Sordariomycetes	OTU876	4	7.14082e-06	0.0555556
d__Eukaryota	k__Fungi	p__Ascomycota	c__Eurotiomycetes	o__Chaetothyriales	f__Cyphellophoraceae	g__Cyphellophora	s__unclassified_g__Cyphellophora	OTU1212	120	0.000214225	0.166667
d__Eukaryota	k__Fungi	p__Mortierellomycota	c__Mortierellomycetes	o__Mortierellales	f__Mortierellaceae	g__Mortierella	s__Mortierella_alpina	OTU748	18	3.21337e-05	0.111111
d__Eukaryota	k__Fungi	p__Ascomycota	c__Dothideomycetes	o__Pleosporales	f__Didymosphaeriaceae	g__Paraconiothyrium	s__Paraconiothyrium_sp	OTU1073	7	1.24964e-05	0.111111
d__Eukaryota	k__Fungi	p__Basidiomycota	c__Agaricomycetes	o__Agaricales	f__Lycoperdaceae	g__Lycoperdon	s__Lycoperdon_curtisii	OTU598	62	0.000110683	0.166667
d__Eukaryota	k__Fungi	p__Ascomycota	c__Dothideomycetes	o__Pleosporales	f__unclassified_o__Pleosporales	g__unclassified_o__Pleosporales	s__unclassified_o__Pleosporales	OTU1146	23	4.10597e-05	0.0555556
d__Eukaryota	k__Fungi	p__Ascomycota	c__Dothideomycetes	o__Capnodiales	f__Mycosphaerellaceae	g__Neoceratosperma	s__Neoceratosperma_yunnanensis	OTU792	807	0.00144066	0.166667
d__Eukaryota	k__Fungi	p__Ascomycota	c__Sordariomycetes	o__Hypocreales	f__Nectriaceae	g__Fusarium	s__unclassified_g__Fusarium	OTU1003	6	1.07112e-05	0.166667
d__Eukaryota	k__Fungi	p__Ascomycota	c__Sordariomycetes	o__Xylariales	f__Xylariaceae	g__Nemania	s__unclassified_g__Nemania	OTU1402	2	3.57041e-06	0.0555556
d__Eukaryota	k__Fungi	p__Basidiomycota	c__Tremellomycetes	o__Tremellales	f__Rhynchogastremataceae	g__Papiliotrema	s__Papiliotrema_flavescens	OTU1482	4808	0.00858326	0.666667
d__Eukaryota	k__Fungi	p__Ascomycota	c__Sordariomycetes	o__Xylariales	f__Xylariaceae	g__unclassified_f__Xylariaceae	s__unclassified_f__Xylariaceae	OTU565	3	5.35561e-06	0.0555556
d__Eukaryota	k__Fungi	p__Ascomycota	c__Leotiomycetes	o__Helotiales	f__Dermateaceae	g__Trimmatostroma	s__Trimmatostroma_cordae	OTU431	6	1.07112e-05	0.0555556
d__Eukaryota	k__Fungi	p__Ascomycota	c__Dothideomycetes	o__Pleosporales	f__Phaeosphaeriaceae	g__Phaeosphaeria	s__Phaeosphaeria_microscopica	OTU635	321	0.000573051	0.444444
d__Eukaryota	k__Fungi	p__Ascomycota	c__Sordariomycetes	o__Xylariales	f__Xylariaceae	g__unclassified_f__Xylariaceae	s__unclassified_f__Xylariaceae	OTU568	42	7.49786e-05	0.0555556
d__Eukaryota	k__Fungi	p__Ascomycota	c__Sordariomycetes	o__Xylariales	f__Xylariaceae	g__unclassified_f__Xylariaceae	s__unclassified_f__Xylariaceae	OTU738	1	1.7852e-06	0.0555556
d__Eukaryota	k__Fungi	p__Basidiomycota	c__Malasseziomycetes	o__Malasseziales	f__unclassified_o__Malasseziales	g__unclassified_o__Malasseziales	s__Malasseziales_sp	OTU701	3	5.35561e-06	0.0555556
d__Eukaryota	k__Fungi	p__Ascomycota	c__Dothideomycetes	o__Pleosporales	f__unclassified_o__Pleosporales	g__unclassified_o__Pleosporales	s__unclassified_o__Pleosporales	OTU148	21	3.74893e-05	0.0555556
d__Eukaryota	k__Fungi	p__unclassified_k__Fungi	c__unclassified_k__Fungi	o__unclassified_k__Fungi	f__unclassified_k__Fungi	g__unclassified_k__Fungi	s__unclassified_k__Fungi	OTU38	3	5.35561e-06	0.0555556
d__Eukaryota	k__Fungi	p__unclassified_k__Fungi	c__unclassified_k__Fungi	o__unclassified_k__Fungi	f__unclassified_k__Fungi	g__unclassified_k__Fungi	s__unclassified_k__Fungi	OTU35	1	1.7852e-06	0.0555556
d__Eukaryota	k__Fungi	p__unclassified_k__Fungi	c__unclassified_k__Fungi	o__unclassified_k__Fungi	f__unclassified_k__Fungi	g__unclassified_k__Fungi	s__unclassified_k__Fungi	OTU34	9	1.60668e-05	0.222222
d__Eukaryota	k__Fungi	p__Ascomycota	c__Eurotiomycetes	o__Chaetothyriales	f__Cyphellophoraceae	g__Cyphellophora	s__unclassified_g__Cyphellophora	OTU1451	1	1.7852e-06	0.0555556
d__Eukaryota	k__Fungi	p__unclassified_k__Fungi	c__unclassified_k__Fungi	o__unclassified_k__Fungi	f__unclassified_k__Fungi	g__unclassified_k__Fungi	s__unclassified_k__Fungi	OTU31	2	3.57041e-06	0.111111
d__Eukaryota	k__Fungi	p__unclassified_k__Fungi	c__unclassified_k__Fungi	o__unclassified_k__Fungi	f__unclassified_k__Fungi	g__unclassified_k__Fungi	s__unclassified_k__Fungi	OTU30	19	3.39189e-05	0.222222
d__Eukaryota	k__Fungi	p__Glomeromycota	c__Glomeromycetes	o__Glomerales	f__Glomeraceae	g__Rhizophagus	s__Rhizophagus_fasciculatus	OTU713	7	1.24964e-05	0.0555556
d__Eukaryota	k__Fungi	p__Basidiomycota	c__Agaricomycetes	o__Agaricales	f__Entolomataceae	g__Clitopilus	s__Clitopilus_sp	OTU606	24	4.28449e-05	0.0555556
d__Eukaryota	k__Fungi	p__Ascomycota	c__Dothideomycetes	o__Pleosporales	f__unclassified_o__Pleosporales	g__unclassified_o__Pleosporales	s__unclassified_o__Pleosporales	OTU1293	13	2.32077e-05	0.111111
d__Eukaryota	k__Fungi	p__Ascomycota	c__Sordariomycetes	o__Hypocreales	f__Tilachlidiaceae	g__unclassified_f__Tilachlidiaceae	s__Tilachlidiaceae_sp	OTU1416	2	3.57041e-06	0.0555556
d__Eukaryota	k__Fungi	p__Basidiomycota	c__Agaricomycetes	o__Polyporales	f__Xenasmataceae	g__Xenasmatella	s__Xenasmatella_sp	OTU1193	5	8.92602e-06	0.0555556
d__Eukaryota	k__Fungi	p__Ascomycota	c__Sordariomycetes	o__Myrmecridiales	f__Myrmecridiaceae	g__Myrmecridium	s__unclassified_g__Myrmecridium	OTU752	20	3.57041e-05	0.0555556
d__Eukaryota	k__Fungi	p__Ascomycota	c__Sordariomycetes	o__Diaporthales	f__Diaporthaceae	g__Diaporthe	s__Diaporthe_xishuangbanica	OTU804	2	3.57041e-06	0.0555556
d__Eukaryota	k__Fungi	p__Ascomycota	c__Dothideomycetes	o__Pleosporales	f__Phaeosphaeriaceae	g__Phaeosphaeriopsis	s__Phaeosphaeriopsis_musae	OTU2025	135	0.000241003	0.166667
d__Eukaryota	k__Fungi	p__Basidiomycota	c__Agaricomycetes	o__Polyporales	f__Ganodermataceae	g__Ganoderma	s__Ganoderma_sichuanense	OTU1728	2	3.57041e-06	0.0555556
d__Eukaryota	k__Fungi	p__Basidiomycota	c__Agaricomycetes	o__Agaricales	f__Psathyrellaceae	g__Coprinellus	s__Coprinellus_micaceus	OTU1028	6	1.07112e-05	0.111111
d__Eukaryota	k__Fungi	p__Basidiomycota	c__Cystobasidiomycetes	o__Cystobasidiales	f__Cystobasidiaceae	g__Occultifur	s__Occultifur_externus	OTU350	4	7.14082e-06	0.0555556
d__Eukaryota	k__Fungi	p__Ascomycota	c__Sordariomycetes	o__Myrmecridiales	f__Myrmecridiaceae	g__Myrmecridium	s__Myrmecridium_sp	OTU569	14	2.49929e-05	0.0555556
d__Eukaryota	k__Fungi	p__Ascomycota	c__Eurotiomycetes	o__Chaetothyriales	f__Herpotrichiellaceae	g__Capronia	s__Capronia_parasitica	OTU1455	17	3.03485e-05	0.0555556
d__Eukaryota	k__Fungi	p__Ascomycota	c__Sordariomycetes	o__Hypocreales	f__Hypocreaceae	g__Monocillium	s__unclassified_g__Monocillium	OTU954	66	0.000117823	0.166667
d__Eukaryota	k__Fungi	p__Ascomycota	c__Sordariomycetes	o__Xylariales	f__Xylariaceae	g__Xylaria	s__Xylaria_curta	OTU998	1	1.7852e-06	0.0555556
d__Eukaryota	k__Fungi	p__Ascomycota	c__Leotiomycetes	o__Helotiales	f__Helotiaceae	g__Articulospora	s__Articulospora_sp	OTU1082	3	5.35561e-06	0.111111
d__Eukaryota	k__Fungi	p__Ascomycota	c__unclassified_p__Ascomycota	o__unclassified_p__Ascomycota	f__unclassified_p__Ascomycota	g__unclassified_p__Ascomycota	s__unclassified_p__Ascomycota	OTU1242	2	3.57041e-06	0.0555556
d__Eukaryota	k__Fungi	p__Ascomycota	c__Sordariomycetes	o__Xylariales	f__unclassified_o__Xylariales	g__unclassified_o__Xylariales	s__unclassified_o__Xylariales	OTU1250	4	7.14082e-06	0.0555556
d__Eukaryota	k__Fungi	p__Ascomycota	c__Sordariomycetes	o__Glomerellales	f__Plectosphaerellaceae	g__Plectosphaerella	s__unclassified_g__Plectosphaerella	OTU1491	12187	0.0217563	0.666667
d__Eukaryota	k__Fungi	p__Rozellomycota	c__unclassified_p__Rozellomycota	o__unclassified_p__Rozellomycota	f__unclassified_p__Rozellomycota	g__unclassified_p__Rozellomycota	s__Rozellomycota_sp	OTU499	5	8.92602e-06	0.0555556
d__Eukaryota	k__Fungi	p__Ascomycota	c__Sordariomycetes	o__Hypocreales	f__Bionectriaceae	g__Hydropisphaera	s__Hydropisphaera_bambusicola	OTU1370	6	1.07112e-05	0.0555556
d__Eukaryota	k__Fungi	p__Ascomycota	c__unclassified_p__Ascomycota	o__unclassified_p__Ascomycota	f__unclassified_p__Ascomycota	g__unclassified_p__Ascomycota	s__unclassified_p__Ascomycota	OTU1403	13	2.32077e-05	0.0555556
d__Eukaryota	k__Fungi	p__Basidiomycota	c__Agaricomycetes	o__unclassified_c__Agaricomycetes	f__unclassified_c__Agaricomycetes	g__unclassified_c__Agaricomycetes	s__unclassified_c__Agaricomycetes	OTU121	115	0.000205298	0.111111
d__Eukaryota	k__Fungi	p__Basidiomycota	c__Agaricomycetes	o__unclassified_c__Agaricomycetes	f__unclassified_c__Agaricomycetes	g__unclassified_c__Agaricomycetes	s__unclassified_c__Agaricomycetes	OTU127	4	7.14082e-06	0.0555556
d__Eukaryota	k__Fungi	p__Ascomycota	c__Sordariomycetes	o__Magnaporthales	f__Magnaporthaceae	g__Arxiella	s__Arxiella_dolichandrae	OTU2095	2	3.57041e-06	0.0555556
d__Eukaryota	k__Fungi	p__Ascomycota	c__Dothideomycetes	o__Capnodiales	f__Mycosphaerellaceae	g__Neoceratosperma	s__Neoceratosperma_eucalypti	OTU828	5	8.92602e-06	0.0555556
d__Eukaryota	k__Fungi	p__Basidiomycota	c__Agaricomycetes	o__Agaricales	f__Strophariaceae	g__Pholiota	s__Pholiota_multicingulata	OTU1204	18	3.21337e-05	0.111111
d__Eukaryota	k__Fungi	p__Basidiomycota	c__Agaricomycetes	o__Polyporales	f__Ganodermataceae	g__Loweporus	s__Loweporus_sp	OTU1051	7	1.24964e-05	0.111111
d__Eukaryota	k__Fungi	p__Basidiomycota	c__Tremellomycetes	o__Cystofilobasidiales	f__Mrakiaceae	g__Krasilnikovozyma	s__Krasilnikovozyma_sp	OTU213	4	7.14082e-06	0.111111
d__Eukaryota	k__Fungi	p__Ascomycota	c__Sordariomycetes	o__Xylariales	f__unclassified_o__Xylariales	g__unclassified_o__Xylariales	s__unclassified_o__Xylariales	OTU581	11	1.96372e-05	0.166667
d__Eukaryota	k__Fungi	p__Ascomycota	c__Leotiomycetes	o__Helotiales	f__Helotiaceae	g__Articulospora	s__Articulospora_sp	OTU1464	4	7.14082e-06	0.0555556
d__Eukaryota	k__Fungi	p__Ascomycota	c__Dothideomycetes	o__Pleosporales	f__unclassified_o__Pleosporales	g__unclassified_o__Pleosporales	s__unclassified_o__Pleosporales	OTU1071	27	4.82005e-05	0.166667
d__Eukaryota	k__Fungi	p__unclassified_k__Fungi	c__unclassified_k__Fungi	o__unclassified_k__Fungi	f__unclassified_k__Fungi	g__unclassified_k__Fungi	s__unclassified_k__Fungi	OTU729	6	1.07112e-05	0.0555556
d__Eukaryota	k__Fungi	p__Ascomycota	c__Dothideomycetes	o__Venturiales	f__Sympoventuriaceae	g__Ochroconis	s__Ochroconis_cordanae	OTU103	4992	0.00891174	0.222222
d__Eukaryota	k__Fungi	p__Ascomycota	c__Sordariomycetes	o__Xylariales	f__unclassified_o__Xylariales	g__unclassified_o__Xylariales	s__unclassified_o__Xylariales	OTU838	33	5.89117e-05	0.111111
d__Eukaryota	k__Fungi	p__Ascomycota	c__Sordariomycetes	o__Hypocreales	f__Nectriaceae	g__unclassified_f__Nectriaceae	s__unclassified_f__Nectriaceae	OTU1306	66	0.000117823	0.222222
d__Eukaryota	k__Fungi	p__Ascomycota	c__Dothideomycetes	o__Pleosporales	f__unclassified_o__Pleosporales	g__unclassified_o__Pleosporales	s__unclassified_o__Pleosporales	OTU1453	2	3.57041e-06	0.0555556
d__Eukaryota	k__Fungi	p__Ascomycota	c__Sordariomycetes	o__Hypocreales	f__Nectriaceae	g__Albonectria	s__Albonectria_rigidiuscula	OTU1152	9	1.60668e-05	0.111111
d__Eukaryota	k__Fungi	p__Basidiomycota	c__Agaricomycetes	o__Cantharellales	f__Ceratobasidiaceae	g__Thanatephorus	s__unclassified_g__Thanatephorus	OTU115	36	6.42674e-05	0.0555556
d__Eukaryota	k__Fungi	p__Ascomycota	c__Sordariomycetes	o__unclassified_c__Sordariomycetes	f__unclassified_c__Sordariomycetes	g__unclassified_c__Sordariomycetes	s__unclassified_c__Sordariomycetes	OTU1187	5	8.92602e-06	0.0555556
d__Eukaryota	k__Fungi	p__Ascomycota	c__Sordariomycetes	o__Diaporthales	f__Valsaceae	g__Phomopsis	s__Phomopsis_asparagi	OTU811	5	8.92602e-06	0.111111
d__Eukaryota	k__Fungi	p__Ascomycota	c__Sordariomycetes	o__unclassified_c__Sordariomycetes	f__unclassified_c__Sordariomycetes	g__unclassified_c__Sordariomycetes	s__unclassified_c__Sordariomycetes	OTU1183	28	4.99857e-05	0.111111
d__Eukaryota	k__Fungi	p__Ascomycota	c__Eurotiomycetes	o__Chaetothyriales	f__unclassified_o__Chaetothyriales	g__unclassified_o__Chaetothyriales	s__unclassified_o__Chaetothyriales	OTU516	9	1.60668e-05	0.166667
d__Eukaryota	k__Fungi	p__Ascomycota	c__Sordariomycetes	o__unclassified_c__Sordariomycetes	f__unclassified_c__Sordariomycetes	g__unclassified_c__Sordariomycetes	s__unclassified_c__Sordariomycetes	OTU648	39	6.9623e-05	0.0555556
d__Eukaryota	k__Fungi	p__Ascomycota	c__Sordariomycetes	o__unclassified_c__Sordariomycetes	f__unclassified_c__Sordariomycetes	g__unclassified_c__Sordariomycetes	s__unclassified_c__Sordariomycetes	OTU641	37	6.60526e-05	0.166667
d__Eukaryota	k__Fungi	p__Ascomycota	c__Sordariomycetes	o__Hypocreales	f__Nectriaceae	g__Nectria	s__Nectria_pseudotrichia	OTU1185	16	2.85633e-05	0.0555556
d__Eukaryota	k__Fungi	p__Ascomycota	c__Saccharomycetes	o__Saccharomycetales	f__Pichiaceae	g__Ogataea	s__Ogataea_sp	OTU969	2	3.57041e-06	0.0555556
d__Eukaryota	k__Fungi	p__unclassified_k__Fungi	c__unclassified_k__Fungi	o__unclassified_k__Fungi	f__unclassified_k__Fungi	g__unclassified_k__Fungi	s__unclassified_k__Fungi	OTU22	1	1.7852e-06	0.0555556
d__Eukaryota	k__Fungi	p__unclassified_k__Fungi	c__unclassified_k__Fungi	o__unclassified_k__Fungi	f__unclassified_k__Fungi	g__unclassified_k__Fungi	s__unclassified_k__Fungi	OTU24	259	0.000462368	0.722222
d__Eukaryota	k__Fungi	p__Ascomycota	c__Orbiliomycetes	o__Orbiliales	f__Orbiliaceae	g__unclassified_f__Orbiliaceae	s__unclassified_f__Orbiliaceae	OTU1147	27	4.82005e-05	0.111111
d__Eukaryota	k__Fungi	p__unclassified_k__Fungi	c__unclassified_k__Fungi	o__unclassified_k__Fungi	f__unclassified_k__Fungi	g__unclassified_k__Fungi	s__unclassified_k__Fungi	OTU29	4	7.14082e-06	0.111111
d__Eukaryota	k__Fungi	p__Ascomycota	c__Sordariomycetes	o__Xylariales	f__Xylariaceae	g__unclassified_f__Xylariaceae	s__unclassified_f__Xylariaceae	OTU1137	6	1.07112e-05	0.0555556
d__Eukaryota	k__Fungi	p__Ascomycota	c__Sordariomycetes	o__unclassified_c__Sordariomycetes	f__unclassified_c__Sordariomycetes	g__unclassified_c__Sordariomycetes	s__unclassified_c__Sordariomycetes	OTU48	22	3.92745e-05	0.0555556
d__Eukaryota	k__Fungi	p__Ascomycota	c__Leotiomycetes	o__Helotiales	f__Chaetomellaceae	g__Pilidium	s__Pilidium_concavum	OTU725	2	3.57041e-06	0.0555556
d__Eukaryota	k__Fungi	p__Ascomycota	c__Dothideomycetes	o__Capnodiales	f__unclassified_o__Capnodiales	g__unclassified_o__Capnodiales	s__unclassified_o__Capnodiales	OTU1291	12	2.14225e-05	0.0555556
d__Eukaryota	k__Fungi	p__Basidiomycota	c__Agaricomycetes	o__Thelephorales	f__Thelephoraceae	g__unclassified_f__Thelephoraceae	s__unclassified_f__Thelephoraceae	OTU1394	2	3.57041e-06	0.0555556
d__Eukaryota	k__Fungi	p__Basidiomycota	c__Agaricomycetes	o__Auriculariales	f__Exidiaceae	g__unclassified_f__Exidiaceae	s__unclassified_f__Exidiaceae	OTU1945	3	5.35561e-06	0.0555556
d__Eukaryota	k__Fungi	p__Ascomycota	c__Sordariomycetes	o__Xylariales	f__Xylariaceae	g__Astrocystis	s__Astrocystis_bambusae	OTU533	2	3.57041e-06	0.0555556
d__Eukaryota	k__Fungi	p__Ascomycota	c__Dothideomycetes	o__Pleosporales	f__Phaeosphaeriaceae	g__unclassified_f__Phaeosphaeriaceae	s__unclassified_f__Phaeosphaeriaceae	OTU2085	360	0.000642674	0.333333
d__Eukaryota	k__Fungi	p__Ascomycota	c__Dothideomycetes	o__Pleosporales	f__Didymosphaeriaceae	g__Letendraea	s__Letendraea_helminthicola	OTU614	239	0.000426664	0.277778
d__Eukaryota	k__Fungi	p__Ascomycota	c__Pezizomycetes	o__Pezizales	f__Pyronemataceae	g__Cheilymenia	s__Cheilymenia_theleboloides	OTU1326	11	1.96372e-05	0.0555556
d__Eukaryota	k__Fungi	p__Ascomycota	c__Eurotiomycetes	o__Chaetothyriales	f__Herpotrichiellaceae	g__Exophiala	s__Exophiala_equina	OTU1543	4420	0.0078906	0.388889
d__Eukaryota	k__Fungi	p__Ascomycota	c__Sordariomycetes	o__unclassified_c__Sordariomycetes	f__unclassified_c__Sordariomycetes	g__unclassified_c__Sordariomycetes	s__unclassified_c__Sordariomycetes	OTU882	7	1.24964e-05	0.0555556
d__Eukaryota	k__Fungi	p__Ascomycota	c__Dothideomycetes	o__Pleosporales	f__Pleomassariaceae	g__Prosthemium	s__Prosthemium_betulinum	OTU1065	3	5.35561e-06	0.0555556
d__Eukaryota	k__Fungi	p__Ascomycota	c__Sordariomycetes	o__Sordariales	f__Sordariales_fam_Incertae_sedis	g__Conlarium	s__Conlarium_aquaticum	OTU1818	1	1.7852e-06	0.0555556
d__Eukaryota	k__Fungi	p__Basidiomycota	c__Atractiellomycetes	o__Atractiellales	f__unclassified_o__Atractiellales	g__unclassified_o__Atractiellales	s__Atractiellales_sp	OTU764	8539	0.0152439	0.277778
d__Eukaryota	k__Fungi	p__Ascomycota	c__Dothideomycetes	o__Pleosporales	f__Cucurbitariaceae	g__Pyrenochaeta	s__Pyrenochaeta_sp	OTU1930	25	4.46301e-05	0.166667
d__Eukaryota	k__Fungi	p__Basidiomycota	c__Pucciniomycetes	o__Septobasidiales	f__Septobasidiaceae	g__unclassified_f__Septobasidiaceae	s__unclassified_f__Septobasidiaceae	OTU771	11	1.96372e-05	0.0555556
d__Eukaryota	k__Fungi	p__Ascomycota	c__Leotiomycetes	o__unclassified_c__Leotiomycetes	f__unclassified_c__Leotiomycetes	g__unclassified_c__Leotiomycetes	s__unclassified_c__Leotiomycetes	OTU834	5	8.92602e-06	0.0555556
d__Eukaryota	k__Fungi	p__Ascomycota	c__Sordariomycetes	o__Glomerellales	f__Plectosphaerellaceae	g__Lectera	s__Lectera_sp	OTU743	52	9.28306e-05	0.0555556
d__Eukaryota	k__Fungi	p__Ascomycota	c__Eurotiomycetes	o__Eurotiales	f__Aspergillaceae	g__Aspergillus	s__Aspergillus_penicillioides	OTU1345	2	3.57041e-06	0.111111
d__Eukaryota	k__Fungi	p__Basidiomycota	c__Microbotryomycetes	o__Microbotryomycetes_ord_Incertae_sedis	f__Chrysozymaceae	g__Pseudohyphozyma	s__Pseudohyphozyma_pustula	OTU212	8	1.42816e-05	0.166667
d__Eukaryota	k__Fungi	p__Ascomycota	c__Dothideomycetes	o__Pleosporales	f__Didymosphaeriaceae	g__unclassified_f__Didymosphaeriaceae	s__unclassified_f__Didymosphaeriaceae	OTU768	6	1.07112e-05	0.0555556
d__Eukaryota	k__Fungi	p__Glomeromycota	c__Glomeromycetes	o__Glomerales	f__Glomeraceae	g__unclassified_f__Glomeraceae	s__unclassified_f__Glomeraceae	OTU922	105	0.000187446	0.111111
d__Eukaryota	k__Fungi	p__Basidiomycota	c__Tremellomycetes	o__Trichosporonales	f__Trichosporonaceae	g__Cutaneotrichosporon	s__Cutaneotrichosporon_cutaneum	OTU617	66	0.000117823	0.222222
d__Eukaryota	k__Fungi	p__Ascomycota	c__unclassified_p__Ascomycota	o__unclassified_p__Ascomycota	f__unclassified_p__Ascomycota	g__unclassified_p__Ascomycota	s__unclassified_p__Ascomycota	OTU113	269	0.00048022	0.166667
d__Eukaryota	k__Fungi	p__Ascomycota	c__unclassified_p__Ascomycota	o__unclassified_p__Ascomycota	f__unclassified_p__Ascomycota	g__unclassified_p__Ascomycota	s__unclassified_p__Ascomycota	OTU81	1	1.7852e-06	0.0555556
d__Eukaryota	k__Fungi	p__Ascomycota	c__Eurotiomycetes	o__Chaetothyriales	f__Chaetothyriales_fam_Incertae_sedis	g__Strelitziana	s__Strelitziana_eucalypti	OTU387	18	3.21337e-05	0.111111
d__Eukaryota	k__Fungi	p__Ascomycota	c__Sordariomycetes	o__Diaporthales	f__Diaporthaceae	g__Diaporthe	s__Diaporthe_nobilis	OTU796	31	5.53413e-05	0.222222
d__Eukaryota	k__Fungi	p__Ascomycota	c__Sordariomycetes	o__Xylariales	f__Xylariaceae	g__Xylaria	s__Xylaria_ochraceostroma	OTU826	3	5.35561e-06	0.0555556
d__Eukaryota	k__Fungi	p__Ascomycota	c__Sordariomycetes	o__Hypocreales	f__unclassified_o__Hypocreales	g__unclassified_o__Hypocreales	s__unclassified_o__Hypocreales	OTU1318	1	1.7852e-06	0.0555556
d__Eukaryota	k__Fungi	p__Basidiomycota	c__Tremellomycetes	o__Trichosporonales	f__Trichosporonaceae	g__Trichosporon	s__Trichosporon_coremiiforme	OTU1519	464	0.000828335	0.611111
d__Eukaryota	k__Fungi	p__unclassified_k__Fungi	c__unclassified_k__Fungi	o__unclassified_k__Fungi	f__unclassified_k__Fungi	g__unclassified_k__Fungi	s__unclassified_k__Fungi	OTU541	3	5.35561e-06	0.0555556
d__Eukaryota	k__Fungi	p__Ascomycota	c__Dothideomycetes	o__Capnodiales	f__Mycosphaerellaceae	g__Cercospora	s__unclassified_g__Cercospora	OTU1530	3	5.35561e-06	0.166667
d__Eukaryota	k__Fungi	p__Ascomycota	c__Eurotiomycetes	o__Chaetothyriales	f__Herpotrichiellaceae	g__Cladophialophora	s__unclassified_g__Cladophialophora	OTU1245	7	1.24964e-05	0.111111
d__Eukaryota	k__Fungi	p__Ascomycota	c__Dothideomycetes	o__Capnodiales	f__Neodevriesiaceae	g__Neodevriesia	s__unclassified_g__Neodevriesia	OTU1380	8	1.42816e-05	0.0555556
d__Eukaryota	k__Fungi	p__Ascomycota	c__Dothideomycetes	o__Capnodiales	f__Capnodiaceae	g__Capnodium	s__Capnodium_coffeae	OTU1074	307	0.000548058	0.166667
d__Eukaryota	k__Fungi	p__Ascomycota	c__Eurotiomycetes	o__Chaetothyriales	f__Herpotrichiellaceae	g__Cladophialophora	s__Cladophialophora_sp	OTU904	161	0.000287418	0.166667
d__Eukaryota	k__Fungi	p__Ascomycota	c__Dothideomycetes	o__Botryosphaeriales	f__Aplosporellaceae	g__Aplosporella	s__unclassified_g__Aplosporella	OTU720	4	7.14082e-06	0.0555556
d__Eukaryota	k__Fungi	p__Basidiomycota	c__Tremellomycetes	o__Tremellales	f__Cuniculitremaceae	g__Kockovaella	s__unclassified_g__Kockovaella	OTU1405	3	5.35561e-06	0.0555556
d__Eukaryota	k__Fungi	p__Basidiomycota	c__Tremellomycetes	o__Tremellales	f__Bulleribasidiaceae	g__Vishniacozyma	s__unclassified_g__Vishniacozyma	OTU2041	22	3.92745e-05	0.111111
d__Eukaryota	k__Fungi	p__Ascomycota	c__Eurotiomycetes	o__Chaetothyriales	f__Trichomeriaceae	g__unclassified_f__Trichomeriaceae	s__Trichomeriaceae_sp	OTU1266	2	3.57041e-06	0.0555556
d__Eukaryota	k__Fungi	p__Ascomycota	c__Sordariomycetes	o__Xylariales	f__Apiosporaceae	g__Arthrinium	s__Arthrinium_malaysianum	OTU852	23	4.10597e-05	0.111111
d__Eukaryota	k__Fungi	p__Ascomycota	c__Sordariomycetes	o__Xylariales	f__Xylariaceae	g__Xylaria	s__Xylaria_hypoxylon	OTU1667	5	8.92602e-06	0.0555556
d__Eukaryota	k__Fungi	p__Ascomycota	c__unclassified_p__Ascomycota	o__unclassified_p__Ascomycota	f__unclassified_p__Ascomycota	g__unclassified_p__Ascomycota	s__unclassified_p__Ascomycota	OTU1433	2	3.57041e-06	0.0555556
d__Eukaryota	k__Fungi	p__Ascomycota	c__Sordariomycetes	o__Glomerellales	f__Glomerellaceae	g__Colletotrichum	s__Colletotrichum_truncatum	OTU1488	44864	0.0800914	0.777778
d__Eukaryota	k__Fungi	p__Ascomycota	c__Dothideomycetes	o__Venturiales	f__Sympoventuriaceae	g__Melnikomyces	s__Melnikomyces_vietnamensis	OTU1412	1	1.7852e-06	0.0555556
d__Eukaryota	k__Fungi	p__Ascomycota	c__unclassified_p__Ascomycota	o__unclassified_p__Ascomycota	f__unclassified_p__Ascomycota	g__unclassified_p__Ascomycota	s__unclassified_p__Ascomycota	OTU591	677	0.00120858	0.222222
d__Eukaryota	k__Fungi	p__Ascomycota	c__Saccharomycetes	o__Saccharomycetales	f__Saccharomycetales_fam_Incertae_sedis	g__Candida	s__Candida_subhashii	OTU666	103	0.000183876	0.0555556
d__Eukaryota	k__Fungi	p__Ascomycota	c__Dothideomycetes	o__Pleosporales	f__Tetraplosphaeriaceae	g__Tetraplosphaeria	s__unclassified_g__Tetraplosphaeria	OTU1206	6	1.07112e-05	0.0555556
d__Eukaryota	k__Fungi	p__Ascomycota	c__unclassified_p__Ascomycota	o__unclassified_p__Ascomycota	f__unclassified_p__Ascomycota	g__unclassified_p__Ascomycota	s__unclassified_p__Ascomycota	OTU756	55	9.81862e-05	0.0555556
d__Eukaryota	k__Fungi	p__Ascomycota	c__Sordariomycetes	o__Xylariales	f__unclassified_o__Xylariales	g__unclassified_o__Xylariales	s__unclassified_o__Xylariales	OTU1232	8	1.42816e-05	0.111111
d__Eukaryota	k__Fungi	p__Ascomycota	c__Sordariomycetes	o__Glomerellales	f__Glomerellaceae	g__Colletotrichum	s__Colletotrichum_boninense	OTU818	29	5.17709e-05	0.333333
d__Eukaryota	k__Fungi	p__Ascomycota	c__Sordariomycetes	o__Xylariales	f__Sporocadaceae	g__Neopestalotiopsis	s__Neopestalotiopsis_protearum	OTU653	1171	0.00209047	0.388889
d__Eukaryota	k__Fungi	p__Ascomycota	c__Eurotiomycetes	o__Chaetothyriales	f__unclassified_o__Chaetothyriales	g__unclassified_o__Chaetothyriales	s__unclassified_o__Chaetothyriales	OTU506	7	1.24964e-05	0.0555556
d__Eukaryota	k__Fungi	p__Basidiomycota	c__Agaricomycetes	o__Auriculariales	f__unclassified_o__Auriculariales	g__unclassified_o__Auriculariales	s__unclassified_o__Auriculariales	OTU1209	3	5.35561e-06	0.0555556
d__Eukaryota	k__Fungi	p__Ascomycota	c__Sordariomycetes	o__unclassified_c__Sordariomycetes	f__unclassified_c__Sordariomycetes	g__unclassified_c__Sordariomycetes	s__unclassified_c__Sordariomycetes	OTU466	1	1.7852e-06	0.0555556
d__Eukaryota	k__Fungi	p__unclassified_k__Fungi	c__unclassified_k__Fungi	o__unclassified_k__Fungi	f__unclassified_k__Fungi	g__unclassified_k__Fungi	s__unclassified_k__Fungi	OTU437	6	1.07112e-05	0.111111
d__Eukaryota	k__Fungi	p__unclassified_k__Fungi	c__unclassified_k__Fungi	o__unclassified_k__Fungi	f__unclassified_k__Fungi	g__unclassified_k__Fungi	s__unclassified_k__Fungi	OTU1344	3	5.35561e-06	0.0555556
d__Eukaryota	k__Fungi	p__unclassified_k__Fungi	c__unclassified_k__Fungi	o__unclassified_k__Fungi	f__unclassified_k__Fungi	g__unclassified_k__Fungi	s__unclassified_k__Fungi	OTU1340	35	6.24821e-05	0.0555556
d__Eukaryota	k__Fungi	p__Ascomycota	c__Eurotiomycetes	o__Chaetothyriales	f__Chaetothyriales_fam_Incertae_sedis	g__Strelitziana	s__unclassified_g__Strelitziana	OTU1281	2	3.57041e-06	0.111111
d__Eukaryota	k__Fungi	p__Ascomycota	c__unclassified_p__Ascomycota	o__unclassified_p__Ascomycota	f__unclassified_p__Ascomycota	g__unclassified_p__Ascomycota	s__unclassified_p__Ascomycota	OTU967	7	1.24964e-05	0.111111
d__Eukaryota	k__Fungi	p__Ascomycota	c__unclassified_p__Ascomycota	o__unclassified_p__Ascomycota	f__unclassified_p__Ascomycota	g__unclassified_p__Ascomycota	s__unclassified_p__Ascomycota	OTU964	3	5.35561e-06	0.0555556
d__Eukaryota	k__Fungi	p__Ascomycota	c__Saccharomycetes	o__Saccharomycetales	f__Phaffomycetaceae	g__Wickerhamomyces	s__Wickerhamomyces_anomalus	OTU2129	117	0.000208869	0.222222
d__Eukaryota	k__Fungi	p__Ascomycota	c__Sordariomycetes	o__Hypocreales	f__Hypocreales_fam_Incertae_sedis	g__Acremonium	s__Acremonium_sclerotigenum	OTU761	6957	0.0124197	0.444444
d__Eukaryota	k__Fungi	p__Ascomycota	c__Sordariomycetes	o__Xylariales	f__Xylariaceae	g__Hypoxylon	s__unclassified_g__Hypoxylon	OTU2094	19	3.39189e-05	0.222222
d__Eukaryota	k__Fungi	p__Ascomycota	c__Dothideomycetes	o__Pleosporales	f__Lophiotremataceae	g__Lophiotrema	s__Lophiotrema_sp	OTU1740	2	3.57041e-06	0.0555556
d__Eukaryota	k__Fungi	p__Basidiomycota	c__Tremellomycetes	o__Tremellales	f__Bulleribasidiaceae	g__Bulleribasidium	s__Bulleribasidium_foliicola	OTU1390	8	1.42816e-05	0.111111
d__Eukaryota	k__Fungi	p__Ascomycota	c__Sordariomycetes	o__Hypocreales	f__Hypocreales_fam_Incertae_sedis	g__Acremonium	s__Acremonium_stromaticum	OTU1404	2	3.57041e-06	0.0555556
d__Eukaryota	k__Fungi	p__Ascomycota	c__Sordariomycetes	o__Xylariales	f__Xylariaceae	g__Emarcea	s__unclassified_g__Emarcea	OTU1447	4	7.14082e-06	0.0555556
d__Eukaryota	k__Fungi	p__Ascomycota	c__Dothideomycetes	o__Capnodiales	f__unclassified_o__Capnodiales	g__unclassified_o__Capnodiales	s__unclassified_o__Capnodiales	OTU473	1	1.7852e-06	0.0555556
d__Eukaryota	k__Fungi	p__Ascomycota	c__Sordariomycetes	o__Trichosphaeriales	f__Trichosphaeriaceae	g__Nigrospora	s__Nigrospora_oryzae	OTU1078	212	0.000378463	0.333333
d__Eukaryota	k__Fungi	p__Ascomycota	c__Eurotiomycetes	o__Eurotiales	f__Aspergillaceae	g__Aspergillus	s__Aspergillus_minisclerotigenes	OTU1490	234	0.000417738	0.277778
d__Eukaryota	k__Fungi	p__Ascomycota	c__Sordariomycetes	o__Diaporthales	f__Diaporthaceae	g__Diaporthe	s__unclassified_g__Diaporthe	OTU994	7	1.24964e-05	0.0555556
d__Eukaryota	k__Fungi	p__Basidiomycota	c__Tremellomycetes	o__Tremellales	f__Bulleribasidiaceae	g__Bulleribasidium	s__Bulleribasidium_variabile	OTU436	13	2.32077e-05	0.111111
d__Eukaryota	k__Fungi	p__Ascomycota	c__Eurotiomycetes	o__Chaetothyriales	f__Cyphellophoraceae	g__Cyphellophora	s__Cyphellophora_pluriseptata	OTU440	1	1.7852e-06	0.0555556
d__Eukaryota	k__Fungi	p__Ascomycota	c__Orbiliomycetes	o__unclassified_c__Orbiliomycetes	f__unclassified_c__Orbiliomycetes	g__unclassified_c__Orbiliomycetes	s__Orbiliomycetes_sp	OTU1101	111	0.000198158	0.166667
d__Eukaryota	k__Fungi	p__Ascomycota	c__Eurotiomycetes	o__Chaetothyriales	f__Cyphellophoraceae	g__Cyphellophora	s__Cyphellophora_pauciseptata	OTU1052	79	0.000141031	0.166667
d__Eukaryota	k__Fungi	p__Ascomycota	c__Eurotiomycetes	o__Chaetothyriales	f__Cyphellophoraceae	g__Cyphellophora	s__unclassified_g__Cyphellophora	OTU446	18	3.21337e-05	0.166667
d__Eukaryota	k__Fungi	p__Ascomycota	c__Lecanoromycetes	o__unclassified_c__Lecanoromycetes	f__unclassified_c__Lecanoromycetes	g__unclassified_c__Lecanoromycetes	s__unclassified_c__Lecanoromycetes	OTU1248	2	3.57041e-06	0.0555556
d__Eukaryota	k__Fungi	p__Ascomycota	c__Sordariomycetes	o__Glomerellales	f__Glomerellaceae	g__Colletotrichum	s__Colletotrichum_sydowii	OTU760	21	3.74893e-05	0.111111
d__Eukaryota	k__Fungi	p__Ascomycota	c__Sordariomycetes	o__Hypocreales	f__Hypocreales_fam_Incertae_sedis	g__Acremonium	s__unclassified_g__Acremonium	OTU1474	61	0.000108897	0.0555556
d__Eukaryota	k__Fungi	p__Basidiomycota	c__Microbotryomycetes	o__Microbotryomycetes_ord_Incertae_sedis	f__Chrysozymaceae	g__Slooffia	s__Slooffia_tsugae	OTU1244	7	1.24964e-05	0.0555556
d__Eukaryota	k__Fungi	p__Ascomycota	c__unclassified_p__Ascomycota	o__unclassified_p__Ascomycota	f__unclassified_p__Ascomycota	g__unclassified_p__Ascomycota	s__unclassified_p__Ascomycota	OTU101	44	7.8549e-05	0.111111
d__Eukaryota	k__Fungi	p__Ascomycota	c__Sordariomycetes	o__Xylariales	f__Xylariales_fam_Incertae_sedis	g__Robillarda	s__unclassified_g__Robillarda	OTU1418	67	0.000119609	0.0555556
d__Eukaryota	k__Fungi	p__Ascomycota	c__Dothideomycetes	o__Venturiales	f__Sympoventuriaceae	g__Scolecobasidium	s__Scolecobasidium_constrictum	OTU374	1	1.7852e-06	0.0555556
d__Eukaryota	k__Fungi	p__Ascomycota	c__Sordariomycetes	o__Glomerellales	f__Glomerellaceae	g__Colletotrichum	s__Colletotrichum_guajavae	OTU630	103	0.000183876	0.388889
d__Eukaryota	k__Fungi	p__Ascomycota	c__Sordariomycetes	o__Glomerellales	f__Glomerellaceae	g__Colletotrichum	s__unclassified_g__Colletotrichum	OTU619	124	0.000221365	0.5
d__Eukaryota	k__Fungi	p__Ascomycota	c__Dothideomycetes	o__Pleosporales	f__Didymellaceae	g__Leptosphaerulina	s__unclassified_g__Leptosphaerulina	OTU153	574	0.00102471	0.388889
d__Eukaryota	k__Fungi	p__Ascomycota	c__Dothideomycetes	o__Pleosporales	f__Didymellaceae	g__unclassified_f__Didymellaceae	s__unclassified_f__Didymellaceae	OTU504	418	0.000746215	0.277778
d__Eukaryota	k__Fungi	p__Ascomycota	c__unclassified_p__Ascomycota	o__unclassified_p__Ascomycota	f__unclassified_p__Ascomycota	g__unclassified_p__Ascomycota	s__unclassified_p__Ascomycota	OTU1294	4	7.14082e-06	0.111111
d__Eukaryota	k__Fungi	p__Ascomycota	c__unclassified_p__Ascomycota	o__unclassified_p__Ascomycota	f__unclassified_p__Ascomycota	g__unclassified_p__Ascomycota	s__unclassified_p__Ascomycota	OTU1292	3	5.35561e-06	0.111111
d__Eukaryota	k__Fungi	p__Ascomycota	c__Eurotiomycetes	o__Chaetothyriales	f__Cyphellophoraceae	g__Cyphellophora	s__Cyphellophora_fusarioides	OTU110	3	5.35561e-06	0.0555556
d__Eukaryota	k__Fungi	p__Basidiomycota	c__Agaricomycetes	o__Agaricales	f__Agaricaceae	g__Agaricus	s__Agaricus_pallidobrunneus	OTU2099	28	4.99857e-05	0.0555556
d__Eukaryota	k__Fungi	p__Ascomycota	c__Sordariomycetes	o__unclassified_c__Sordariomycetes	f__unclassified_c__Sordariomycetes	g__unclassified_c__Sordariomycetes	s__unclassified_c__Sordariomycetes	OTU593	6	1.07112e-05	0.0555556
d__Eukaryota	k__Fungi	p__Ascomycota	c__Sordariomycetes	o__Xylariales	f__Xylariaceae	g__unclassified_f__Xylariaceae	s__unclassified_f__Xylariaceae	OTU1335	1	1.7852e-06	0.0555556
d__Eukaryota	k__Fungi	p__Basidiomycota	c__Agaricomycetes	o__Tremellodendropsidales	f__unclassified_o__Tremellodendropsidales	g__unclassified_o__Tremellodendropsidales	s__Tremellodendropsidales_sp	OTU1115	2	3.57041e-06	0.0555556
d__Eukaryota	k__Fungi	p__Basidiomycota	c__Agaricomycetes	o__Agaricales	f__Strophariaceae	g__Psilocybe	s__unclassified_g__Psilocybe	OTU1222	44	7.8549e-05	0.166667
d__Eukaryota	k__Fungi	p__Ascomycota	c__Sordariomycetes	o__Hypocreales	f__Nectriaceae	g__unclassified_f__Nectriaceae	s__unclassified_f__Nectriaceae	OTU924	131	0.000233862	0.0555556
d__Eukaryota	k__Fungi	p__Ascomycota	c__Sordariomycetes	o__Magnaporthales	f__Magnaporthaceae	g__unclassified_f__Magnaporthaceae	s__unclassified_f__Magnaporthaceae	OTU1389	3	5.35561e-06	0.0555556
d__Eukaryota	k__Fungi	p__Basidiomycota	c__Agaricomycetes	o__Trechisporales	f__Hydnodontaceae	g__Trechispora	s__Trechispora_sp	OTU1184	2	3.57041e-06	0.0555556
d__Eukaryota	k__Fungi	p__Ascomycota	c__Saccharomycetes	o__Saccharomycetales	f__Saccharomycetaceae	g__Issatchenkia	s__Issatchenkia_orientalis	OTU916	240	0.000428449	0.333333
d__Eukaryota	k__Fungi	p__Ascomycota	c__unclassified_p__Ascomycota	o__unclassified_p__Ascomycota	f__unclassified_p__Ascomycota	g__unclassified_p__Ascomycota	s__unclassified_p__Ascomycota	OTU1421	1	1.7852e-06	0.0555556
d__Eukaryota	k__Fungi	p__Ascomycota	c__Eurotiomycetes	o__Chaetothyriales	f__Herpotrichiellaceae	g__Cladophialophora	s__Cladophialophora_chaetospira	OTU898	2683	0.0047897	0.333333
d__Eukaryota	k__Fungi	p__Ascomycota	c__Eurotiomycetes	o__Chaetothyriales	f__Trichomeriaceae	g__Trichomerium	s__unclassified_g__Trichomerium	OTU1477	8	1.42816e-05	0.0555556
d__Eukaryota	k__Fungi	p__Ascomycota	c__Eurotiomycetes	o__Chaetothyriales	f__Herpotrichiellaceae	g__Cladophialophora	s__Cladophialophora_sp	OTU869	70	0.000124964	0.222222
d__Eukaryota	k__Fungi	p__Ascomycota	c__Sordariomycetes	o__Hypocreales	f__unclassified_o__Hypocreales	g__unclassified_o__Hypocreales	s__unclassified_o__Hypocreales	OTU1300	5	8.92602e-06	0.0555556
d__Eukaryota	k__Fungi	p__unclassified_k__Fungi	c__unclassified_k__Fungi	o__unclassified_k__Fungi	f__unclassified_k__Fungi	g__unclassified_k__Fungi	s__unclassified_k__Fungi	OTU1374	5	8.92602e-06	0.0555556
d__Eukaryota	k__Fungi	p__Ascomycota	c__Sordariomycetes	o__Hypocreales	f__unclassified_o__Hypocreales	g__unclassified_o__Hypocreales	s__unclassified_o__Hypocreales	OTU1307	4	7.14082e-06	0.0555556
d__Eukaryota	k__Fungi	p__Ascomycota	c__Dothideomycetes	o__Pleosporales	f__unclassified_o__Pleosporales	g__unclassified_o__Pleosporales	s__unclassified_o__Pleosporales	OTU1054	13	2.32077e-05	0.111111
d__Eukaryota	k__Fungi	p__unclassified_k__Fungi	c__unclassified_k__Fungi	o__unclassified_k__Fungi	f__unclassified_k__Fungi	g__unclassified_k__Fungi	s__unclassified_k__Fungi	OTU553	4	7.14082e-06	0.0555556
d__Eukaryota	k__Fungi	p__unclassified_k__Fungi	c__unclassified_k__Fungi	o__unclassified_k__Fungi	f__unclassified_k__Fungi	g__unclassified_k__Fungi	s__unclassified_k__Fungi	OTU552	13	2.32077e-05	0.0555556
d__Eukaryota	k__Fungi	p__Basidiomycota	c__Microbotryomycetes	o__Sporidiobolales	f__Sporidiobolaceae	g__Rhodosporidiobolus	s__Rhodosporidiobolus_ruineniae	OTU816	12	2.14225e-05	0.0555556
d__Eukaryota	k__Fungi	p__Ascomycota	c__Dothideomycetes	o__Pleosporales	f__unclassified_o__Pleosporales	g__unclassified_o__Pleosporales	s__unclassified_o__Pleosporales	OTU1120	166	0.000296344	0.111111
d__Eukaryota	k__Fungi	p__Ascomycota	c__Dothideomycetes	o__Pleosporales	f__unclassified_o__Pleosporales	g__unclassified_o__Pleosporales	s__unclassified_o__Pleosporales	OTU1127	6	1.07112e-05	0.0555556
d__Eukaryota	k__Fungi	p__Ascomycota	c__Eurotiomycetes	o__Chaetothyriales	f__Cyphellophoraceae	g__Cyphellophora	s__Cyphellophora_phyllostachydis	OTU950	90	0.000160668	0.277778
d__Eukaryota	k__Fungi	p__unclassified_k__Fungi	c__unclassified_k__Fungi	o__unclassified_k__Fungi	f__unclassified_k__Fungi	g__unclassified_k__Fungi	s__unclassified_k__Fungi	OTU278	1	1.7852e-06	0.0555556
d__Eukaryota	k__Fungi	p__Basidiomycota	c__Agaricomycetes	o__Agaricales	f__Bolbitiaceae	g__unclassified_f__Bolbitiaceae	s__unclassified_f__Bolbitiaceae	OTU754	21	3.74893e-05	0.0555556
d__Eukaryota	k__Fungi	p__Ascomycota	c__Sordariomycetes	o__Glomerellales	f__Glomerellaceae	g__Colletotrichum	s__unclassified_g__Colletotrichum	OTU1134	118	0.000210654	0.388889
d__Eukaryota	k__Fungi	p__Ascomycota	c__Dothideomycetes	o__Capnodiales	f__unclassified_o__Capnodiales	g__unclassified_o__Capnodiales	s__unclassified_o__Capnodiales	OTU1518	1	1.7852e-06	0.0555556
d__Eukaryota	k__Fungi	p__Ascomycota	c__Eurotiomycetes	o__Eurotiales	f__Trichocomaceae	g__Talaromyces	s__Talaromyces_subaurantiacus	OTU1178	173	0.00030884	0.111111
d__Eukaryota	k__Fungi	p__Ascomycota	c__Dothideomycetes	o__Capnodiales	f__Mycosphaerellaceae	g__Cercospora	s__unclassified_g__Cercospora	OTU806	1	1.7852e-06	0.0555556
d__Eukaryota	k__Fungi	p__Ascomycota	c__Sordariomycetes	o__Togniniales	f__Togniniaceae	g__Phaeoacremonium	s__Phaeoacremonium_scolyti	OTU745	98	0.00017495	0.166667
d__Eukaryota	k__Fungi	p__Ascomycota	c__Sordariomycetes	o__Xylariales	f__Xylariaceae	g__unclassified_f__Xylariaceae	s__unclassified_f__Xylariaceae	OTU1261	4	7.14082e-06	0.111111
d__Eukaryota	k__Fungi	p__Basidiomycota	c__Agaricomycetes	o__Agaricales	f__unclassified_o__Agaricales	g__unclassified_o__Agaricales	s__unclassified_o__Agaricales	OTU723	1	1.7852e-06	0.0555556
d__Eukaryota	k__Fungi	p__Basidiomycota	c__Agaricomycetes	o__Agaricales	f__Psathyrellaceae	g__Lacrymaria	s__Lacrymaria_lacrymabunda	OTU138	208	0.000371322	0.166667
d__Eukaryota	k__Fungi	p__Ascomycota	c__Sordariomycetes	o__Diaporthales	f__Diaporthaceae	g__Diaporthe	s__Diaporthe_tectonae	OTU631	308	0.000549843	0.277778
d__Eukaryota	k__Fungi	p__Ascomycota	c__Sordariomycetes	o__Xylariales	f__unclassified_o__Xylariales	g__unclassified_o__Xylariales	s__unclassified_o__Xylariales	OTU1080	344	0.00061411	0.166667
d__Eukaryota	k__Fungi	p__Basidiomycota	c__Agaricomycetes	o__Agaricales	f__Psathyrellaceae	g__Coprinellus	s__Coprinellus_disseminatus	OTU474	21	3.74893e-05	0.111111
d__Eukaryota	k__Fungi	p__Basidiomycota	c__Agaricomycetes	o__Polyporales	f__Ganodermataceae	g__Ganoderma	s__unclassified_g__Ganoderma	OTU943	9	1.60668e-05	0.111111
d__Eukaryota	k__Fungi	p__Ascomycota	c__Leotiomycetes	o__Helotiales	f__Dermateaceae	g__Trimmatostroma	s__Trimmatostroma_cordae	OTU360	6	1.07112e-05	0.111111
d__Eukaryota	k__Fungi	p__Ascomycota	c__Dothideomycetes	o__Pleosporales	f__unclassified_o__Pleosporales	g__unclassified_o__Pleosporales	s__unclassified_o__Pleosporales	OTU1942	3	5.35561e-06	0.111111
d__Eukaryota	k__Fungi	p__Ascomycota	c__Sordariomycetes	o__Hypocreales	f__Clavicipitaceae	g__Metarhizium	s__Metarhizium_marquandii	OTU1363	2	3.57041e-06	0.0555556
d__Eukaryota	k__Fungi	p__Ascomycota	c__Sordariomycetes	o__Branch06	f__unclassified_o__Branch06	g__unclassified_o__Branch06	s__Branch06_sp	OTU714	30	5.35561e-05	0.0555556
d__Eukaryota	k__Fungi	p__Ascomycota	c__Sordariomycetes	o__Hypocreales	f__Bionectriaceae	g__Clonostachys	s__Clonostachys_sp	OTU2011	7	1.24964e-05	0.0555556
d__Eukaryota	k__Fungi	p__Basidiomycota	c__Tremellomycetes	o__Tremellales	f__Bulleribasidiaceae	g__Hannaella	s__unclassified_g__Hannaella	OTU1121	11	1.96372e-05	0.166667
d__Eukaryota	k__Fungi	p__unclassified_k__Fungi	c__unclassified_k__Fungi	o__unclassified_k__Fungi	f__unclassified_k__Fungi	g__unclassified_k__Fungi	s__unclassified_k__Fungi	OTU693	2	3.57041e-06	0.0555556
d__Eukaryota	k__Fungi	p__Ascomycota	c__Sordariomycetes	o__Xylariales	f__Xylariaceae	g__Xylaria	s__unclassified_g__Xylaria	OTU1278	5	8.92602e-06	0.0555556
d__Eukaryota	k__Fungi	p__Ascomycota	c__Sordariomycetes	o__Sordariales	f__Chaetomiaceae	g__unclassified_f__Chaetomiaceae	s__unclassified_f__Chaetomiaceae	OTU1045	14	2.49929e-05	0.0555556
d__Eukaryota	k__Fungi	p__Ascomycota	c__Lecanoromycetes	o__Lecanorales	f__Ramalinaceae	g__Bacidia	s__unclassified_g__Bacidia	OTU1336	12	2.14225e-05	0.0555556
d__Eukaryota	k__Fungi	p__Ascomycota	c__Sordariomycetes	o__Xylariales	f__Xylariaceae	g__unclassified_f__Xylariaceae	s__unclassified_f__Xylariaceae	OTU777	2	3.57041e-06	0.0555556
d__Eukaryota	k__Fungi	p__Ascomycota	c__Sordariomycetes	o__Hypocreales	f__Cordycipitaceae	g__Cordyceps	s__Cordyceps_militaris	OTU848	25	4.46301e-05	0.0555556
d__Eukaryota	k__Fungi	p__Ascomycota	c__Leotiomycetes	o__Helotiales	f__unclassified_o__Helotiales	g__unclassified_o__Helotiales	s__unclassified_o__Helotiales	OTU857	4	7.14082e-06	0.0555556
d__Eukaryota	k__Fungi	p__Ascomycota	c__Sordariomycetes	o__unclassified_c__Sordariomycetes	f__unclassified_c__Sordariomycetes	g__unclassified_c__Sordariomycetes	s__unclassified_c__Sordariomycetes	OTU1419	4	7.14082e-06	0.0555556
d__Eukaryota	k__Fungi	p__Ascomycota	c__Dothideomycetes	o__Pleosporales	f__Phaeosphaeriaceae	g__unclassified_f__Phaeosphaeriaceae	s__unclassified_f__Phaeosphaeriaceae	OTU647	5	8.92602e-06	0.0555556
d__Eukaryota	k__Fungi	p__Glomeromycota	c__Glomeromycetes	o__Diversisporales	f__Diversisporales_fam_Incertae_sedis	g__Entrophospora	s__Entrophospora_sp	OTU1298	13	2.32077e-05	0.111111
d__Eukaryota	k__Fungi	p__Basidiomycota	c__unclassified_p__Basidiomycota	o__unclassified_p__Basidiomycota	f__unclassified_p__Basidiomycota	g__unclassified_p__Basidiomycota	s__unclassified_p__Basidiomycota	OTU524	7	1.24964e-05	0.0555556
d__Eukaryota	k__Fungi	p__Ascomycota	c__Sordariomycetes	o__Hypocreales	f__Nectriaceae	g__Calonectria	s__unclassified_g__Calonectria	OTU821	7	1.24964e-05	0.111111
d__Eukaryota	k__Fungi	p__Ascomycota	c__Sordariomycetes	o__Sordariales	f__Sordariales_fam_Incertae_sedis	g__Rhexodenticula	s__Rhexodenticula_sp	OTU863	78	0.000139246	0.0555556
d__Eukaryota	k__Fungi	p__Ascomycota	c__Eurotiomycetes	o__Chaetothyriales	f__Herpotrichiellaceae	g__unclassified_f__Herpotrichiellaceae	s__unclassified_f__Herpotrichiellaceae	OTU313	18	3.21337e-05	0.0555556
d__Eukaryota	k__Fungi	p__Ascomycota	c__Eurotiomycetes	o__Chaetothyriales	f__Herpotrichiellaceae	g__Exophiala	s__unclassified_g__Exophiala	OTU1338	3	5.35561e-06	0.0555556
d__Eukaryota	k__Fungi	p__Ascomycota	c__Sordariomycetes	o__Xylariales	f__Xylariaceae	g__unclassified_f__Xylariaceae	s__unclassified_f__Xylariaceae	OTU1468	2	3.57041e-06	0.0555556
d__Eukaryota	k__Fungi	p__Ascomycota	c__Dothideomycetes	o__Pleosporales	f__Didymellaceae	g__unclassified_f__Didymellaceae	s__unclassified_f__Didymellaceae	OTU1498	2318	0.0041381	0.5
d__Eukaryota	k__Fungi	p__Ascomycota	c__Sordariomycetes	o__Xylariales	f__Xylariaceae	g__unclassified_f__Xylariaceae	s__unclassified_f__Xylariaceae	OTU1460	1	1.7852e-06	0.0555556
d__Eukaryota	k__Fungi	p__Ascomycota	c__Eurotiomycetes	o__Chaetothyriales	f__Chaetothyriales_fam_Incertae_sedis	g__Strelitziana	s__unclassified_g__Strelitziana	OTU489	39	6.9623e-05	0.166667
d__Eukaryota	k__Fungi	p__Ascomycota	c__Eurotiomycetes	o__Chaetothyriales	f__Herpotrichiellaceae	g__Cladophialophora	s__Cladophialophora_chaetospira	OTU1237	88	0.000157098	0.0555556
d__Eukaryota	k__Fungi	p__unclassified_k__Fungi	c__unclassified_k__Fungi	o__unclassified_k__Fungi	f__unclassified_k__Fungi	g__unclassified_k__Fungi	s__unclassified_k__Fungi	OTU1214	5	8.92602e-06	0.0555556
d__Eukaryota	k__Fungi	p__Ascomycota	c__Sordariomycetes	o__Xylariales	f__Xylariaceae	g__Hypoxylon	s__Hypoxylon_fendleri	OTU2068	12	2.14225e-05	0.222222
d__Eukaryota	k__Fungi	p__unclassified_k__Fungi	c__unclassified_k__Fungi	o__unclassified_k__Fungi	f__unclassified_k__Fungi	g__unclassified_k__Fungi	s__unclassified_k__Fungi	OTU1210	1	1.7852e-06	0.0555556
d__Eukaryota	k__Fungi	p__Basidiomycota	c__Agaricomycetes	o__Agaricales	f__Cortinariaceae	g__Gymnopilus	s__unclassified_g__Gymnopilus	OTU1928	5	8.92602e-06	0.0555556
d__Eukaryota	k__Fungi	p__Ascomycota	c__Sordariomycetes	o__Diaporthales	f__Diaporthaceae	g__Diaporthe	s__unclassified_g__Diaporthe	OTU1140	79	0.000141031	0.333333
d__Eukaryota	k__Fungi	p__Basidiomycota	c__Agaricomycetes	o__Cantharellales	f__Ceratobasidiaceae	g__unclassified_f__Ceratobasidiaceae	s__unclassified_f__Ceratobasidiaceae	OTU901	885	0.00157991	0.166667
d__Eukaryota	k__Fungi	p__unclassified_k__Fungi	c__unclassified_k__Fungi	o__unclassified_k__Fungi	f__unclassified_k__Fungi	g__unclassified_k__Fungi	s__unclassified_k__Fungi	OTU709	19	3.39189e-05	0.111111
d__Eukaryota	k__Fungi	p__unclassified_k__Fungi	c__unclassified_k__Fungi	o__unclassified_k__Fungi	f__unclassified_k__Fungi	g__unclassified_k__Fungi	s__unclassified_k__Fungi	OTU704	45	8.03342e-05	0.111111
d__Eukaryota	k__Fungi	p__unclassified_k__Fungi	c__unclassified_k__Fungi	o__unclassified_k__Fungi	f__unclassified_k__Fungi	g__unclassified_k__Fungi	s__unclassified_k__Fungi	OTU705	74	0.000132105	0.0555556
d__Eukaryota	k__Fungi	p__unclassified_k__Fungi	c__unclassified_k__Fungi	o__unclassified_k__Fungi	f__unclassified_k__Fungi	g__unclassified_k__Fungi	s__unclassified_k__Fungi	OTU706	8	1.42816e-05	0.0555556
d__Eukaryota	k__Fungi	p__Basidiomycota	c__Agaricomycetes	o__Agaricales	f__Psathyrellaceae	g__Coprinellus	s__Coprinellus_disseminatus	OTU2036	46	8.21194e-05	0.277778
d__Eukaryota	k__Fungi	p__unclassified_k__Fungi	c__unclassified_k__Fungi	o__unclassified_k__Fungi	f__unclassified_k__Fungi	g__unclassified_k__Fungi	s__unclassified_k__Fungi	OTU700	20	3.57041e-05	0.0555556
d__Eukaryota	k__Fungi	p__Ascomycota	c__Eurotiomycetes	o__Chaetothyriales	f__Cyphellophoraceae	g__Cyphellophora	s__unclassified_g__Cyphellophora	OTU1173	14	2.49929e-05	0.0555556
d__Eukaryota	k__Fungi	p__unclassified_k__Fungi	c__unclassified_k__Fungi	o__unclassified_k__Fungi	f__unclassified_k__Fungi	g__unclassified_k__Fungi	s__unclassified_k__Fungi	OTU703	1	1.7852e-06	0.0555556
d__Eukaryota	k__Fungi	p__Ascomycota	c__Saccharomycetes	o__Saccharomycetales	f__Phaffomycetaceae	g__Wickerhamomyces	s__Wickerhamomyces_anomalus	OTU897	254	0.000453442	0.222222
d__Eukaryota	k__Fungi	p__Ascomycota	c__Dothideomycetes	o__Capnodiales	f__Mycosphaerellaceae	g__Sphaerulina	s__unclassified_g__Sphaerulina	OTU819	1	1.7852e-06	0.0555556
d__Eukaryota	k__Fungi	p__Ascomycota	c__Dothideomycetes	o__Capnodiales	f__Teratosphaeriaceae	g__Devriesia	s__Devriesia_strelitziicola	OTU1009	3	5.35561e-06	0.0555556
d__Eukaryota	k__Fungi	p__Ascomycota	c__Sordariomycetes	o__unclassified_c__Sordariomycetes	f__unclassified_c__Sordariomycetes	g__unclassified_c__Sordariomycetes	s__unclassified_c__Sordariomycetes	OTU336	1	1.7852e-06	0.0555556
d__Eukaryota	k__Fungi	p__Ascomycota	c__Sordariomycetes	o__Sordariales	f__Lasiosphaeriaceae	g__Cercophora	s__Cercophora_thailandica	OTU1102	10	1.7852e-05	0.166667
d__Eukaryota	k__Fungi	p__Ascomycota	c__Sordariomycetes	o__Diaporthales	f__Diaporthaceae	g__Diaporthe	s__unclassified_g__Diaporthe	OTU965	16	2.85633e-05	0.166667
d__Eukaryota	k__Fungi	p__Ascomycota	c__Dothideomycetes	o__Pleosporales	f__Lophiostomataceae	g__Lophiostoma	s__Lophiostoma_cynaroidis	OTU933	2	3.57041e-06	0.0555556
d__Eukaryota	k__Fungi	p__unclassified_k__Fungi	c__unclassified_k__Fungi	o__unclassified_k__Fungi	f__unclassified_k__Fungi	g__unclassified_k__Fungi	s__unclassified_k__Fungi	OTU961	3	5.35561e-06	0.0555556
d__Eukaryota	k__Fungi	p__Ascomycota	c__Dothideomycetes	o__Pleosporales	f__unclassified_o__Pleosporales	g__unclassified_o__Pleosporales	s__unclassified_o__Pleosporales	OTU751	13	2.32077e-05	0.0555556
d__Eukaryota	k__Fungi	p__Basidiomycota	c__Agaricostilbomycetes	o__Agaricostilbales	f__Chionosphaeraceae	g__Kurtzmanomyces	s__unclassified_g__Kurtzmanomyces	OTU1918	5	8.92602e-06	0.111111
d__Eukaryota	k__Fungi	p__Ascomycota	c__Eurotiomycetes	o__Chaetothyriales	f__Herpotrichiellaceae	g__unclassified_f__Herpotrichiellaceae	s__unclassified_f__Herpotrichiellaceae	OTU1145	66	0.000117823	0.166667
d__Eukaryota	k__Fungi	p__Glomeromycota	c__Glomeromycetes	o__Glomerales	f__Glomeraceae	g__unclassified_f__Glomeraceae	s__unclassified_f__Glomeraceae	OTU879	4	7.14082e-06	0.0555556
d__Eukaryota	k__Fungi	p__Basidiomycota	c__Ustilaginomycetes	o__Ustilaginales	f__Ustilaginaceae	g__Moesziomyces	s__Moesziomyces_sp	OTU1483	37	6.60526e-05	0.277778
d__Eukaryota	k__Fungi	p__Basidiomycota	c__unclassified_p__Basidiomycota	o__unclassified_p__Basidiomycota	f__unclassified_p__Basidiomycota	g__unclassified_p__Basidiomycota	s__unclassified_p__Basidiomycota	OTU578	57	0.000101757	0.0555556
d__Eukaryota	k__Fungi	p__unclassified_k__Fungi	c__unclassified_k__Fungi	o__unclassified_k__Fungi	f__unclassified_k__Fungi	g__unclassified_k__Fungi	s__unclassified_k__Fungi	OTU1119	7	1.24964e-05	0.0555556
d__Eukaryota	k__Fungi	p__Basidiomycota	c__Agaricomycetes	o__Agaricales	f__Entolomataceae	g__Clitopilus	s__Clitopilus_kamaka	OTU1343	2	3.57041e-06	0.0555556
d__Eukaryota	k__Fungi	p__Basidiomycota	c__Agaricomycetes	o__Agaricales	f__Strophariaceae	g__Deconica	s__Deconica_sp	OTU655	9	1.60668e-05	0.0555556
d__Eukaryota	k__Fungi	p__Ascomycota	c__Sordariomycetes	o__Sordariales	f__Lasiosphaeriaceae	g__Cercophora	s__unclassified_g__Cercophora	OTU566	70	0.000124964	0.222222
d__Eukaryota	k__Fungi	p__Ascomycota	c__Sordariomycetes	o__Sordariales	f__Lasiosphaeriaceae	g__unclassified_f__Lasiosphaeriaceae	s__unclassified_f__Lasiosphaeriaceae	OTU1409	2	3.57041e-06	0.0555556
d__Eukaryota	k__Fungi	p__Basidiomycota	c__unclassified_p__Basidiomycota	o__unclassified_p__Basidiomycota	f__unclassified_p__Basidiomycota	g__unclassified_p__Basidiomycota	s__unclassified_p__Basidiomycota	OTU1459	2	3.57041e-06	0.0555556
d__Eukaryota	k__Fungi	p__Basidiomycota	c__Agaricostilbomycetes	o__Agaricostilbales	f__Agaricostilbaceae	g__Sterigmatomyces	s__Sterigmatomyces_sp	OTU892	112	0.000199943	0.166667
d__Eukaryota	k__Fungi	p__Ascomycota	c__Dothideomycetes	o__Dothideales	f__Aureobasidiaceae	g__Aureobasidium	s__Aureobasidium_proteae	OTU942	12	2.14225e-05	0.111111
d__Eukaryota	k__Fungi	p__Ascomycota	c__Eurotiomycetes	o__Chaetothyriales	f__Cyphellophoraceae	g__Cyphellophora	s__unclassified_g__Cyphellophora	OTU1002	202	0.000360611	0.166667
d__Eukaryota	k__Fungi	p__unclassified_k__Fungi	c__unclassified_k__Fungi	o__unclassified_k__Fungi	f__unclassified_k__Fungi	g__unclassified_k__Fungi	s__unclassified_k__Fungi	OTU639	13	2.32077e-05	0.0555556
d__Eukaryota	k__Fungi	p__Ascomycota	c__Sordariomycetes	o__Sordariales	f__Sordariales_fam_Incertae_sedis	g__Conlarium	s__Conlarium_aquaticum	OTU885	3	5.35561e-06	0.0555556
d__Eukaryota	k__Fungi	p__unclassified_k__Fungi	c__unclassified_k__Fungi	o__unclassified_k__Fungi	f__unclassified_k__Fungi	g__unclassified_k__Fungi	s__unclassified_k__Fungi	OTU632	27640	0.049343	1
d__Eukaryota	k__Fungi	p__unclassified_k__Fungi	c__unclassified_k__Fungi	o__unclassified_k__Fungi	f__unclassified_k__Fungi	g__unclassified_k__Fungi	s__unclassified_k__Fungi	OTU634	470	0.000839046	0.388889
d__Eukaryota	k__Fungi	p__unclassified_k__Fungi	c__unclassified_k__Fungi	o__unclassified_k__Fungi	f__unclassified_k__Fungi	g__unclassified_k__Fungi	s__unclassified_k__Fungi	OTU637	10	1.7852e-05	0.0555556
d__Eukaryota	k__Fungi	p__Basidiomycota	c__Cystobasidiomycetes	o__Erythrobasidiales	f__Erythrobasidiaceae	g__Erythrobasidium	s__unclassified_g__Erythrobasidium	OTU381	27	4.82005e-05	0.111111
d__Eukaryota	k__Fungi	p__Ascomycota	c__Leotiomycetes	o__Helotiales	f__Leotiaceae	g__Gorgomyces	s__Gorgomyces_sp	OTU530	4	7.14082e-06	0.0555556
d__Eukaryota	k__Fungi	p__Basidiomycota	c__Cystobasidiomycetes	o__Erythrobasidiales	f__Erythrobasidiaceae	g__Erythrobasidium	s__Erythrobasidium_sp	OTU1697	13	2.32077e-05	0.166667
d__Eukaryota	k__Fungi	p__Ascomycota	c__unclassified_p__Ascomycota	o__unclassified_p__Ascomycota	f__unclassified_p__Ascomycota	g__unclassified_p__Ascomycota	s__unclassified_p__Ascomycota	OTU1018	266	0.000474864	0.222222
d__Eukaryota	k__Fungi	p__Ascomycota	c__Sordariomycetes	o__Xylariales	f__Xylariaceae	g__Xylaria	s__Xylaria_longipes	OTU2021	1	1.7852e-06	0.0555556
d__Eukaryota	k__Fungi	p__unclassified_k__Fungi	c__unclassified_k__Fungi	o__unclassified_k__Fungi	f__unclassified_k__Fungi	g__unclassified_k__Fungi	s__unclassified_k__Fungi	OTU1	5	8.92602e-06	0.111111
d__Eukaryota	k__Fungi	p__Ascomycota	c__Sordariomycetes	o__Hypocreales	f__Nectriaceae	g__Gibberella	s__Gibberella_intricans	OTU1515	46	8.21194e-05	0.333333
d__Eukaryota	k__Fungi	p__Ascomycota	c__Dothideomycetes	o__Pleosporales	f__Phaeosphaeriaceae	g__Ophiosphaerella	s__Ophiosphaerella_agrostidis	OTU2115	1	1.7852e-06	0.0555556
d__Eukaryota	k__Fungi	p__Ascomycota	c__Sordariomycetes	o__Conioscyphales	f__Conioscyphaceae	g__Conioscypha	s__Conioscypha_sp	OTU1112	1	1.7852e-06	0.0555556
d__Eukaryota	k__Fungi	p__Ascomycota	c__Sordariomycetes	o__Hypocreales	f__Bionectriaceae	g__Hydropisphaera	s__Hydropisphaera_fungicola	OTU2074	108	0.000192802	0.0555556
d__Eukaryota	k__Fungi	p__Ascomycota	c__Eurotiomycetes	o__Chaetothyriales	f__Trichomeriaceae	g__unclassified_f__Trichomeriaceae	s__unclassified_f__Trichomeriaceae	OTU1377	4	7.14082e-06	0.0555556
d__Eukaryota	k__Fungi	p__Ascomycota	c__Leotiomycetes	o__Helotiales	f__Helotiaceae	g__Tetracladium	s__unclassified_g__Tetracladium	OTU95	3	5.35561e-06	0.0555556
d__Eukaryota	k__Fungi	p__Basidiomycota	c__unclassified_p__Basidiomycota	o__unclassified_p__Basidiomycota	f__unclassified_p__Basidiomycota	g__unclassified_p__Basidiomycota	s__unclassified_p__Basidiomycota	OTU1274	1	1.7852e-06	0.0555556
d__Eukaryota	k__Fungi	p__Basidiomycota	c__Agaricomycetes	o__Agaricales	f__Agaricaceae	g__Hymenagaricus	s__Hymenagaricus_sp	OTU731	4	7.14082e-06	0.0555556
d__Eukaryota	k__Fungi	p__Ascomycota	c__Sordariomycetes	o__unclassified_c__Sordariomycetes	f__unclassified_c__Sordariomycetes	g__unclassified_c__Sordariomycetes	s__unclassified_c__Sordariomycetes	OTU1956	3	5.35561e-06	0.0555556
d__Eukaryota	k__Fungi	p__Ascomycota	c__Sordariomycetes	o__Xylariales	f__Xylariaceae	g__unclassified_f__Xylariaceae	s__unclassified_f__Xylariaceae	OTU949	3	5.35561e-06	0.0555556
d__Eukaryota	k__Fungi	p__unclassified_k__Fungi	c__unclassified_k__Fungi	o__unclassified_k__Fungi	f__unclassified_k__Fungi	g__unclassified_k__Fungi	s__unclassified_k__Fungi	OTU1365	6	1.07112e-05	0.0555556
d__Eukaryota	k__Fungi	p__Ascomycota	c__Eurotiomycetes	o__Chaetothyriales	f__Herpotrichiellaceae	g__Cladophialophora	s__Cladophialophora_chaetospira	OTU1429	61	0.000108897	0.111111
d__Eukaryota	k__Fungi	p__Ascomycota	c__Sordariomycetes	o__Xylariales	f__Xylariaceae	g__Hypoxylon	s__Hypoxylon_haematostroma	OTU1005	18	3.21337e-05	0.0555556
d__Eukaryota	k__Fungi	p__Ascomycota	c__Sordariomycetes	o__Xylariales	f__Xylariaceae	g__Nemania	s__Nemania_diffusa	OTU1144	4	7.14082e-06	0.111111
d__Eukaryota	k__Fungi	p__unclassified_k__Fungi	c__unclassified_k__Fungi	o__unclassified_k__Fungi	f__unclassified_k__Fungi	g__unclassified_k__Fungi	s__unclassified_k__Fungi	OTU561	1	1.7852e-06	0.0555556
d__Eukaryota	k__Fungi	p__Ascomycota	c__unclassified_p__Ascomycota	o__unclassified_p__Ascomycota	f__unclassified_p__Ascomycota	g__unclassified_p__Ascomycota	s__unclassified_p__Ascomycota	OTU550	7	1.24964e-05	0.0555556
d__Eukaryota	k__Fungi	p__Basidiomycota	c__Agaricomycetes	o__Agaricales	f__Strophariaceae	g__Psilocybe	s__unclassified_g__Psilocybe	OTU469	17	3.03485e-05	0.166667
d__Eukaryota	k__Fungi	p__Ascomycota	c__Eurotiomycetes	o__Chaetothyriales	f__Herpotrichiellaceae	g__Cladophialophora	s__Cladophialophora_sp	OTU923	30	5.35561e-05	0.333333
d__Eukaryota	k__Fungi	p__Basidiomycota	c__Tremellomycetes	o__Tremellales	f__unclassified_o__Tremellales	g__unclassified_o__Tremellales	s__unclassified_o__Tremellales	OTU749	184	0.000328478	0.222222
d__Eukaryota	k__Fungi	p__Ascomycota	c__Dothideomycetes	o__Capnodiales	f__Cladosporiaceae	g__Cladosporium	s__Cladosporium_halotolerans	OTU896	74	0.000132105	0.222222
d__Eukaryota	k__Fungi	p__Ascomycota	c__Sordariomycetes	o__Diaporthales	f__Diaporthaceae	g__Diaporthe	s__Diaporthe_sp	OTU1132	2	3.57041e-06	0.0555556
d__Eukaryota	k__Fungi	p__Ascomycota	c__Sordariomycetes	o__Hypocreales	f__Clavicipitaceae	g__Metarhizium	s__Metarhizium_marquandii	OTU721	61	0.000108897	0.111111
d__Eukaryota	k__Fungi	p__Ascomycota	c__Leotiomycetes	o__Helotiales	f__unclassified_o__Helotiales	g__unclassified_o__Helotiales	s__unclassified_o__Helotiales	OTU1383	1	1.7852e-06	0.0555556
d__Eukaryota	k__Fungi	p__Ascomycota	c__Eurotiomycetes	o__Eurotiales	f__Trichocomaceae	g__Thermomyces	s__Thermomyces_lanuginosus	OTU1905	171	0.00030527	0.0555556
d__Eukaryota	k__Fungi	p__Ascomycota	c__Dothideomycetes	o__Pleosporales	f__Arthopyreniaceae	g__unclassified_f__Arthopyreniaceae	s__Arthopyreniaceae_sp	OTU2069	72	0.000128535	0.0555556
d__Eukaryota	k__Fungi	p__Ascomycota	c__Dothideomycetes	o__Hysteriales	f__Hysteriaceae	g__Rhytidhysteron	s__Rhytidhysteron_thailandicum	OTU1069	13	2.32077e-05	0.0555556
d__Eukaryota	k__Fungi	p__Ascomycota	c__Dothideomycetes	o__Venturiales	f__Sympoventuriaceae	g__Scolecobasidium	s__Scolecobasidium_constrictum	OTU365	17	3.03485e-05	0.111111
d__Eukaryota	k__Fungi	p__Ascomycota	c__Pezizomycetes	o__Pezizales	f__Sarcosomataceae	g__unclassified_f__Sarcosomataceae	s__Sarcosomataceae_sp	OTU567	10	1.7852e-05	0.0555556
d__Eukaryota	k__Fungi	p__Ascomycota	c__Sordariomycetes	o__Diaporthales	f__Diaporthaceae	g__Diaporthe	s__Diaporthe_citrichinensis	OTU801	35	6.24821e-05	0.111111
d__Eukaryota	k__Fungi	p__Basidiomycota	c__Agaricomycetes	o__Agaricales	f__Psathyrellaceae	g__Coprinellus	s__Coprinellus_radians	OTU1736	1	1.7852e-06	0.0555556
d__Eukaryota	k__Fungi	p__Ascomycota	c__Sordariomycetes	o__Xylariales	f__Xylariaceae	g__Hypoxylon	s__Hypoxylon_fendleri	OTU1159	3	5.35561e-06	0.0555556
d__Eukaryota	k__Fungi	p__Ascomycota	c__Sordariomycetes	o__Hypocreales	f__Hypocreales_fam_Incertae_sedis	g__Sarocladium	s__Sarocladium_kiliense	OTU324	5	8.92602e-06	0.0555556
d__Eukaryota	k__Fungi	p__Ascomycota	c__Sordariomycetes	o__Xylariales	f__Xylariaceae	g__Hypoxylon	s__Hypoxylon_lateripigmentum	OTU810	1	1.7852e-06	0.0555556
d__Eukaryota	k__Fungi	p__Basidiomycota	c__Tremellomycetes	o__Trichosporonales	f__Trichosporonaceae	g__Apiotrichum	s__Apiotrichum_scarabaeorum	OTU847	32	5.71265e-05	0.0555556
d__Eukaryota	k__Fungi	p__Ascomycota	c__Eurotiomycetes	o__Chaetothyriales	f__Trichomeriaceae	g__unclassified_f__Trichomeriaceae	s__unclassified_f__Trichomeriaceae	OTU1408	33	5.89117e-05	0.0555556
d__Eukaryota	k__Fungi	p__Ascomycota	c__Dothideomycetes	o__Capnodiales	f__Teratosphaeriaceae	g__unclassified_f__Teratosphaeriaceae	s__unclassified_f__Teratosphaeriaceae	OTU1283	2	3.57041e-06	0.0555556
d__Eukaryota	k__Fungi	p__Ascomycota	c__Sordariomycetes	o__Hypocreales	f__Hypocreaceae	g__Trichoderma	s__Trichoderma_velutinum	OTU1026	36	6.42674e-05	0.111111
d__Eukaryota	k__Fungi	p__unclassified_k__Fungi	c__unclassified_k__Fungi	o__unclassified_k__Fungi	f__unclassified_k__Fungi	g__unclassified_k__Fungi	s__unclassified_k__Fungi	OTU627	7	1.24964e-05	0.0555556
d__Eukaryota	k__Fungi	p__unclassified_k__Fungi	c__unclassified_k__Fungi	o__unclassified_k__Fungi	f__unclassified_k__Fungi	g__unclassified_k__Fungi	s__unclassified_k__Fungi	OTU625	4	7.14082e-06	0.0555556
d__Eukaryota	k__Fungi	p__Ascomycota	c__Dothideomycetes	o__Pleosporales	f__Phaeosphaeriaceae	g__Paraphoma	s__Paraphoma_chrysanthemicola	OTU116	928	0.00165667	0.388889
d__Eukaryota	k__Fungi	p__Ascomycota	c__Sordariomycetes	o__unclassified_c__Sordariomycetes	f__unclassified_c__Sordariomycetes	g__unclassified_c__Sordariomycetes	s__unclassified_c__Sordariomycetes	OTU945	6	1.07112e-05	0.0555556
d__Eukaryota	k__Fungi	p__Ascomycota	c__Dothideomycetes	o__Capnodiales	f__unclassified_o__Capnodiales	g__unclassified_o__Capnodiales	s__unclassified_o__Capnodiales	OTU1366	10	1.7852e-05	0.0555556
d__Eukaryota	k__Fungi	p__Ascomycota	c__unclassified_p__Ascomycota	o__unclassified_p__Ascomycota	f__unclassified_p__Ascomycota	g__unclassified_p__Ascomycota	s__unclassified_p__Ascomycota	OTU839	20	3.57041e-05	0.0555556
d__Eukaryota	k__Fungi	p__Ascomycota	c__Dothideomycetes	o__Venturiales	f__Sympoventuriaceae	g__Pseudosigmoidea	s__Pseudosigmoidea_ibarakiensis	OTU1420	3	5.35561e-06	0.0555556
d__Eukaryota	k__Fungi	p__Ascomycota	c__Sordariomycetes	o__Hypocreales	f__Nectriaceae	g__Fusicolla	s__Fusicolla_acetilerea	OTU254	34	6.06969e-05	0.222222
d__Eukaryota	k__Fungi	p__Ascomycota	c__unclassified_p__Ascomycota	o__unclassified_p__Ascomycota	f__unclassified_p__Ascomycota	g__unclassified_p__Ascomycota	s__unclassified_p__Ascomycota	OTU835	3	5.35561e-06	0.0555556
d__Eukaryota	k__Fungi	p__Basidiomycota	c__Tremellomycetes	o__Tremellales	f__Bulleribasidiaceae	g__Vishniacozyma	s__unclassified_g__Vishniacozyma	OTU722	17	3.03485e-05	0.111111
d__Eukaryota	k__Fungi	p__Ascomycota	c__Dothideomycetes	o__Botryosphaeriales	f__Botryosphaeriaceae	g__Neofusicoccum	s__unclassified_g__Neofusicoccum	OTU790	65	0.000116038	0.111111
d__Eukaryota	k__Fungi	p__unclassified_k__Fungi	c__unclassified_k__Fungi	o__unclassified_k__Fungi	f__unclassified_k__Fungi	g__unclassified_k__Fungi	s__unclassified_k__Fungi	OTU91	67	0.000119609	0.555556
d__Eukaryota	k__Fungi	p__Ascomycota	c__Eurotiomycetes	o__Chaetothyriales	f__Cyphellophoraceae	g__Cyphellophora	s__unclassified_g__Cyphellophora	OTU1106	39	6.9623e-05	0.0555556
d__Eukaryota	k__Fungi	p__unclassified_k__Fungi	c__unclassified_k__Fungi	o__unclassified_k__Fungi	f__unclassified_k__Fungi	g__unclassified_k__Fungi	s__unclassified_k__Fungi	OTU710	34	6.06969e-05	0.111111
d__Eukaryota	k__Fungi	p__unclassified_k__Fungi	c__unclassified_k__Fungi	o__unclassified_k__Fungi	f__unclassified_k__Fungi	g__unclassified_k__Fungi	s__unclassified_k__Fungi	OTU717	86	0.000153528	0.166667
d__Eukaryota	k__Fungi	p__Ascomycota	c__Sordariomycetes	o__unclassified_c__Sordariomycetes	f__unclassified_c__Sordariomycetes	g__unclassified_c__Sordariomycetes	s__unclassified_c__Sordariomycetes	OTU830	1	1.7852e-06	0.0555556
d__Eukaryota	k__Fungi	p__unclassified_k__Fungi	c__unclassified_k__Fungi	o__unclassified_k__Fungi	f__unclassified_k__Fungi	g__unclassified_k__Fungi	s__unclassified_k__Fungi	OTU715	76	0.000135676	0.166667
d__Eukaryota	k__Fungi	p__Ascomycota	c__Sordariomycetes	o__Hypocreales	f__Nectriaceae	g__Thelonectria	s__Thelonectria_rubrococca	OTU603	207	0.000369537	0.277778
d__Eukaryota	k__Fungi	p__unclassified_k__Fungi	c__unclassified_k__Fungi	o__unclassified_k__Fungi	f__unclassified_k__Fungi	g__unclassified_k__Fungi	s__unclassified_k__Fungi	OTU718	39	6.9623e-05	0.0555556
d__Eukaryota	k__Fungi	p__Ascomycota	c__Dothideomycetes	o__Capnodiales	f__Mycosphaerellaceae	g__Pseudocercospora	s__unclassified_g__Pseudocercospora	OTU1508	51	9.10454e-05	0.222222
d__Eukaryota	k__Fungi	p__Ascomycota	c__Sordariomycetes	o__Sordariales	f__Lasiosphaeriaceae	g__Schizothecium	s__unclassified_g__Schizothecium	OTU702	51	9.10454e-05	0.0555556
d__Eukaryota	k__Fungi	p__Ascomycota	c__Leotiomycetes	o__Helotiales	f__Hyaloscyphaceae	g__Cistella	s__Cistella_sp	OTU887	7	1.24964e-05	0.0555556
d__Eukaryota	k__Fungi	p__Basidiomycota	c__Agaricomycetes	o__Agaricales	f__Bolbitiaceae	g__Agrocybe	s__Agrocybe_rivulosa	OTU1434	1	1.7852e-06	0.0555556
d__Eukaryota	k__Fungi	p__Ascomycota	c__Arthoniomycetes	o__Arthoniales	f__Arthoniaceae	g__Arthothelium	s__Arthothelium_spectabile	OTU1135	4	7.14082e-06	0.0555556
d__Eukaryota	k__Fungi	p__Ascomycota	c__Saccharomycetes	o__Saccharomycetales	f__Trichomonascaceae	g__Blastobotrys	s__Blastobotrys_malaysiensis	OTU712	440	0.00078549	0.111111
d__Eukaryota	k__Fungi	p__unclassified_k__Fungi	c__unclassified_k__Fungi	o__unclassified_k__Fungi	f__unclassified_k__Fungi	g__unclassified_k__Fungi	s__unclassified_k__Fungi	OTU886	4	7.14082e-06	0.0555556
d__Eukaryota	k__Fungi	p__Ascomycota	c__Eurotiomycetes	o__Chaetothyriales	f__Herpotrichiellaceae	g__Exophiala	s__Exophiala_alcalophila	OTU571	2	3.57041e-06	0.0555556
d__Eukaryota	k__Fungi	p__Basidiomycota	c__Agaricomycetes	o__Agaricales	f__Agaricaceae	g__Micropsalliota	s__unclassified_g__Micropsalliota	OTU1299	5	8.92602e-06	0.0555556
d__Eukaryota	k__Fungi	p__Ascomycota	c__Dothideomycetes	o__Capnodiales	f__Teratosphaeriaceae	g__Euteratosphaeria	s__Euteratosphaeria_verrucosiafricana	OTU1177	27	4.82005e-05	0.166667
d__Eukaryota	k__Fungi	p__Basidiomycota	c__unclassified_p__Basidiomycota	o__unclassified_p__Basidiomycota	f__unclassified_p__Basidiomycota	g__unclassified_p__Basidiomycota	s__unclassified_p__Basidiomycota	OTU1441	2	3.57041e-06	0.0555556
d__Eukaryota	k__Fungi	p__Ascomycota	c__Dothideomycetes	o__Capnodiales	f__Mycosphaerellaceae	g__unclassified_f__Mycosphaerellaceae	s__unclassified_f__Mycosphaerellaceae	OTU825	35	6.24821e-05	0.111111
d__Eukaryota	k__Fungi	p__Glomeromycota	c__Glomeromycetes	o__Glomerales	f__Glomeraceae	g__unclassified_f__Glomeraceae	s__unclassified_f__Glomeraceae	OTU245	13	2.32077e-05	0.0555556
d__Eukaryota	k__Fungi	p__Ascomycota	c__Dothideomycetes	o__Pleosporales	f__Didymellaceae	g__Phoma	s__Phoma_multirostrata	OTU1486	34984	0.0624536	0.722222
d__Eukaryota	k__Fungi	p__unclassified_k__Fungi	c__unclassified_k__Fungi	o__unclassified_k__Fungi	f__unclassified_k__Fungi	g__unclassified_k__Fungi	s__unclassified_k__Fungi	OTU976	133	0.000237432	0.166667
d__Eukaryota	k__Fungi	p__unclassified_k__Fungi	c__unclassified_k__Fungi	o__unclassified_k__Fungi	f__unclassified_k__Fungi	g__unclassified_k__Fungi	s__unclassified_k__Fungi	OTU974	5	8.92602e-06	0.111111
d__Eukaryota	k__Fungi	p__unclassified_k__Fungi	c__unclassified_k__Fungi	o__unclassified_k__Fungi	f__unclassified_k__Fungi	g__unclassified_k__Fungi	s__unclassified_k__Fungi	OTU971	11	1.96372e-05	0.0555556
d__Eukaryota	k__Fungi	p__Basidiomycota	c__Agaricomycetes	o__Cantharellales	f__Ceratobasidiaceae	g__Thanatephorus	s__unclassified_g__Thanatephorus	OTU890	9	1.60668e-05	0.0555556
d__Eukaryota	k__Fungi	p__Basidiomycota	c__Agaricomycetes	o__Polyporales	f__Ganodermataceae	g__Abundisporus	s__Abundisporus_quercicola	OTU1988	6	1.07112e-05	0.0555556
d__Eukaryota	k__Fungi	p__Ascomycota	c__Lecanoromycetes	o__Lecanorales	f__Ramalinaceae	g__unclassified_f__Ramalinaceae	s__unclassified_f__Ramalinaceae	OTU995	55	9.81862e-05	0.0555556
d__Eukaryota	k__Fungi	p__Ascomycota	c__Eurotiomycetes	o__Chaetothyriales	f__Herpotrichiellaceae	g__Cladophialophora	s__unclassified_g__Cladophialophora	OTU461	150	0.000267781	0.111111
d__Eukaryota	k__Fungi	p__Ascomycota	c__Dothideomycetes	o__Pleosporales	f__Morosphaeriaceae	g__Acrocalymma	s__Acrocalymma_walkeri	OTU2054	11	1.96372e-05	0.166667
d__Eukaryota	k__Fungi	p__Ascomycota	c__Dothideomycetes	o__Pleosporales	f__Sporormiaceae	g__unclassified_f__Sporormiaceae	s__unclassified_f__Sporormiaceae	OTU540	2	3.57041e-06	0.0555556
d__Eukaryota	k__Fungi	p__Basidiomycota	c__Tremellomycetes	o__Tremellales	f__Rhynchogastremataceae	g__Papiliotrema	s__Papiliotrema_laurentii	OTU2037	7	1.24964e-05	0.222222
d__Eukaryota	k__Fungi	p__Ascomycota	c__Sordariomycetes	o__Hypocreales	f__unclassified_o__Hypocreales	g__unclassified_o__Hypocreales	s__unclassified_o__Hypocreales	OTU1216	22	3.92745e-05	0.166667
d__Eukaryota	k__Fungi	p__Basidiomycota	c__Agaricomycetes	o__Agaricales	f__Strophariaceae	g__Stropharia	s__Stropharia_rugosoannulata	OTU996	4	7.14082e-06	0.111111
d__Eukaryota	k__Fungi	p__Ascomycota	c__Dothideomycetes	o__Capnodiales	f__Mycosphaerellaceae	g__Pseudocercospora	s__Pseudocercospora_nephrolepidicola	OTU142	453	0.000808698	0.111111
d__Eukaryota	k__Fungi	p__Ascomycota	c__Sordariomycetes	o__unclassified_c__Sordariomycetes	f__unclassified_c__Sordariomycetes	g__unclassified_c__Sordariomycetes	s__unclassified_c__Sordariomycetes	OTU1438	1	1.7852e-06	0.0555556
d__Eukaryota	k__Fungi	p__Ascomycota	c__Sordariomycetes	o__unclassified_c__Sordariomycetes	f__unclassified_c__Sordariomycetes	g__unclassified_c__Sordariomycetes	s__unclassified_c__Sordariomycetes	OTU1431	2	3.57041e-06	0.0555556
d__Eukaryota	k__Fungi	p__Ascomycota	c__Dothideomycetes	o__Pleosporales	f__Didymosphaeriaceae	g__Letendraea	s__Letendraea_helminthicola	OTU767	21	3.74893e-05	0.0555556
d__Eukaryota	k__Fungi	p__Ascomycota	c__Dothideomycetes	o__Botryosphaeriales	f__Botryosphaeriaceae	g__Lasiodiplodia	s__unclassified_g__Lasiodiplodia	OTU854	10	1.7852e-05	0.0555556
d__Eukaryota	k__Fungi	p__Ascomycota	c__Dothideomycetes	o__Pleosporales	f__Morosphaeriaceae	g__Acrocalymma	s__Acrocalymma_medicaginis	OTU1968	70	0.000124964	0.277778
d__Eukaryota	k__Fungi	p__Basidiomycota	c__Tremellomycetes	o__Tremellales	f__Trimorphomycetaceae	g__Saitozyma	s__Saitozyma_ninhbinhensis	OTU921	179	0.000319552	0.222222
d__Eukaryota	k__Fungi	p__Basidiomycota	c__Agaricomycetes	o__Agaricales	f__Agaricaceae	g__Micropsalliota	s__Micropsalliota_furfuracea	OTU1990	2	3.57041e-06	0.0555556
d__Eukaryota	k__Fungi	p__Ascomycota	c__Sordariomycetes	o__Xylariales	f__Amphisphaeriaceae	g__unclassified_f__Amphisphaeriaceae	s__unclassified_f__Amphisphaeriaceae	OTU613	15	2.67781e-05	0.0555556
d__Eukaryota	k__Fungi	p__Ascomycota	c__unclassified_p__Ascomycota	o__unclassified_p__Ascomycota	f__unclassified_p__Ascomycota	g__unclassified_p__Ascomycota	s__unclassified_p__Ascomycota	OTU389	5	8.92602e-06	0.166667
d__Eukaryota	k__Fungi	p__Ascomycota	c__Dothideomycetes	o__Pleosporales	f__Corynesporascaceae	g__Corynespora	s__Corynespora_cassiicola	OTU2134	16	2.85633e-05	0.166667
d__Eukaryota	k__Fungi	p__Ascomycota	c__Leotiomycetes	o__Thelebolales	f__Pseudeurotiaceae	g__Pseudeurotium	s__Pseudeurotium_sp	OTU840	19	3.39189e-05	0.166667
d__Eukaryota	k__Fungi	p__Ascomycota	c__Eurotiomycetes	o__Eurotiales	f__Aspergillaceae	g__Penicillium	s__Penicillium_bialowiezense	OTU1525	5	8.92602e-06	0.0555556
d__Eukaryota	k__Fungi	p__Ascomycota	c__Eurotiomycetes	o__Chaetothyriales	f__Herpotrichiellaceae	g__Exophiala	s__Exophiala_sp	OTU377	15	2.67781e-05	0.111111
d__Eukaryota	k__Fungi	p__Ascomycota	c__Sordariomycetes	o__Xylariales	f__Xylariaceae	g__unclassified_f__Xylariaceae	s__unclassified_f__Xylariaceae	OTU1445	2	3.57041e-06	0.0555556
d__Eukaryota	k__Fungi	p__Basidiomycota	c__Agaricomycetes	o__Agaricales	f__Agaricaceae	g__Micropsalliota	s__Micropsalliota_gracilis	OTU1379	1	1.7852e-06	0.0555556
d__Eukaryota	k__Fungi	p__Ascomycota	c__Sordariomycetes	o__Xylariales	f__Xylariaceae	g__unclassified_f__Xylariaceae	s__unclassified_f__Xylariaceae	OTU1683	7	1.24964e-05	0.111111
d__Eukaryota	k__Fungi	p__Ascomycota	c__Sordariomycetes	o__Xylariales	f__Xylariaceae	g__unclassified_f__Xylariaceae	s__unclassified_f__Xylariaceae	OTU831	1	1.7852e-06	0.0555556
d__Eukaryota	k__Fungi	p__Ascomycota	c__Dothideomycetes	o__Capnodiales	f__unclassified_o__Capnodiales	g__unclassified_o__Capnodiales	s__unclassified_o__Capnodiales	OTU1240	2	3.57041e-06	0.0555556
d__Eukaryota	k__Fungi	p__Ascomycota	c__Saccharomycetes	o__Saccharomycetales	f__Pichiaceae	g__Pichia	s__Pichia_fermentans	OTU865	7	1.24964e-05	0.111111
d__Eukaryota	k__Fungi	p__Ascomycota	c__Dothideomycetes	o__Capnodiales	f__Teratosphaeriaceae	g__unclassified_f__Teratosphaeriaceae	s__unclassified_f__Teratosphaeriaceae	OTU946	4	7.14082e-06	0.0555556
d__Eukaryota	k__Fungi	p__Ascomycota	c__Eurotiomycetes	o__Chaetothyriales	f__Cyphellophoraceae	g__Cyphellophora	s__unclassified_g__Cyphellophora	OTU951	4	7.14082e-06	0.111111
d__Eukaryota	k__Fungi	p__Ascomycota	c__Sordariomycetes	o__Glomerellales	f__Glomerellaceae	g__Colletotrichum	s__Colletotrichum_tofieldiae	OTU1500	26	4.64153e-05	0.166667
d__Eukaryota	k__Fungi	p__unclassified_k__Fungi	c__unclassified_k__Fungi	o__unclassified_k__Fungi	f__unclassified_k__Fungi	g__unclassified_k__Fungi	s__unclassified_k__Fungi	OTU1006	7	1.24964e-05	0.0555556
d__Eukaryota	k__Fungi	p__Ascomycota	c__Sordariomycetes	o__Xylariales	f__Xylariaceae	g__Nodulisporium	s__Nodulisporium_sp	OTU937	5	8.92602e-06	0.0555556
d__Eukaryota	k__Fungi	p__Ascomycota	c__Sordariomycetes	o__Diaporthales	f__Diaporthaceae	g__Diaporthe	s__unclassified_g__Diaporthe	OTU2005	54	9.6401e-05	0.333333
d__Eukaryota	k__Fungi	p__Ascomycota	c__Eurotiomycetes	o__Eurotiales	f__Aspergillaceae	g__Penicillium	s__Penicillium_olsonii	OTU1817	43	7.67638e-05	0.0555556
d__Eukaryota	k__Fungi	p__Basidiomycota	c__Tremellomycetes	o__Trichosporonales	f__Trichosporonaceae	g__Apiotrichum	s__Apiotrichum_montevideense	OTU1529	39985	0.0713814	1
d__Eukaryota	k__Fungi	p__Ascomycota	c__Sordariomycetes	o__unclassified_c__Sordariomycetes	f__unclassified_c__Sordariomycetes	g__unclassified_c__Sordariomycetes	s__unclassified_c__Sordariomycetes	OTU544	56	9.99714e-05	0.166667
d__Eukaryota	k__Fungi	p__Ascomycota	c__Sordariomycetes	o__unclassified_c__Sordariomycetes	f__unclassified_c__Sordariomycetes	g__unclassified_c__Sordariomycetes	s__unclassified_c__Sordariomycetes	OTU546	14	2.49929e-05	0.0555556
d__Eukaryota	k__Fungi	p__Ascomycota	c__Sordariomycetes	o__unclassified_c__Sordariomycetes	f__unclassified_c__Sordariomycetes	g__unclassified_c__Sordariomycetes	s__unclassified_c__Sordariomycetes	OTU542	6	1.07112e-05	0.0555556
d__Eukaryota	k__Fungi	p__Ascomycota	c__Sordariomycetes	o__Sordariales	f__Sordariales_fam_Incertae_sedis	g__Ramophialophora	s__Ramophialophora_sp	OTU878	53	9.46158e-05	0.0555556
d__Eukaryota	k__Fungi	p__Ascomycota	c__Sordariomycetes	o__unclassified_c__Sordariomycetes	f__unclassified_c__Sordariomycetes	g__unclassified_c__Sordariomycetes	s__unclassified_c__Sordariomycetes	OTU549	4	7.14082e-06	0.0555556
d__Eukaryota	k__Fungi	p__Ascomycota	c__Sordariomycetes	o__unclassified_c__Sordariomycetes	f__unclassified_c__Sordariomycetes	g__unclassified_c__Sordariomycetes	s__unclassified_c__Sordariomycetes	OTU548	4	7.14082e-06	0.0555556
d__Eukaryota	k__Fungi	p__unclassified_k__Fungi	c__unclassified_k__Fungi	o__unclassified_k__Fungi	f__unclassified_k__Fungi	g__unclassified_k__Fungi	s__unclassified_k__Fungi	OTU575	15	2.67781e-05	0.0555556
d__Eukaryota	k__Fungi	p__Ascomycota	c__Dothideomycetes	o__Pleosporales	f__unclassified_o__Pleosporales	g__unclassified_o__Pleosporales	s__unclassified_o__Pleosporales	OTU1388	1	1.7852e-06	0.0555556
d__Eukaryota	k__Fungi	p__Ascomycota	c__Sordariomycetes	o__Xylariales	f__Xylariaceae	g__Digitodochium	s__Digitodochium_rhodoleucum	OTU1636	29	5.17709e-05	0.166667
d__Eukaryota	k__Fungi	p__Ascomycota	c__Eurotiomycetes	o__Chaetothyriales	f__Cyphellophoraceae	g__Cyphellophora	s__Cyphellophora_europaea	OTU1046	3	5.35561e-06	0.111111
d__Eukaryota	k__Fungi	p__Ascomycota	c__Sordariomycetes	o__Xylariales	f__Xylariaceae	g__Nemania	s__Nemania_diffusa	OTU1450	2	3.57041e-06	0.0555556
d__Eukaryota	k__Fungi	p__Basidiomycota	c__Agaricomycetes	o__Agaricales	f__Psathyrellaceae	g__Psathyrella	s__unclassified_g__Psathyrella	OTU626	44	7.8549e-05	0.0555556
d__Eukaryota	k__Fungi	p__Ascomycota	c__Sordariomycetes	o__Xylariales	f__unclassified_o__Xylariales	g__unclassified_o__Xylariales	s__unclassified_o__Xylariales	OTU786	4	7.14082e-06	0.0555556
d__Eukaryota	k__Fungi	p__Ascomycota	c__Sordariomycetes	o__Hypocreales	f__unclassified_o__Hypocreales	g__unclassified_o__Hypocreales	s__unclassified_o__Hypocreales	OTU1320	4	7.14082e-06	0.0555556
d__Eukaryota	k__Fungi	p__Ascomycota	c__Sordariomycetes	o__Xylariales	f__Xylariaceae	g__Xylaria	s__Xylaria_nigripes	OTU1705	19	3.39189e-05	0.0555556
d__Eukaryota	k__Fungi	p__Ascomycota	c__Sordariomycetes	o__Phomatosporales	f__Phomatosporaceae	g__Phomatospora	s__Phomatospora_biseriata	OTU1161	1	1.7852e-06	0.0555556
d__Eukaryota	k__Fungi	p__Ascomycota	c__Sordariomycetes	o__Xylariales	f__Xylariales_fam_Incertae_sedis	g__Asteromella	s__Asteromella_pistaciarum	OTU1079	2	3.57041e-06	0.0555556
d__Eukaryota	k__Fungi	p__Ascomycota	c__Sordariomycetes	o__Xylariales	f__Xylariaceae	g__Xylaria	s__Xylaria_cubensis	OTU1304	15	2.67781e-05	0.111111
d__Eukaryota	k__Fungi	p__Ascomycota	c__Eurotiomycetes	o__Chaetothyriales	f__Herpotrichiellaceae	g__Exophiala	s__unclassified_g__Exophiala	OTU2019	407	0.000726578	0.333333
d__Eukaryota	k__Fungi	p__Ascomycota	c__unclassified_p__Ascomycota	o__unclassified_p__Ascomycota	f__unclassified_p__Ascomycota	g__unclassified_p__Ascomycota	s__unclassified_p__Ascomycota	OTU697	11	1.96372e-05	0.0555556
d__Eukaryota	k__Fungi	p__Ascomycota	c__Sordariomycetes	o__Diaporthales	f__Diaporthaceae	g__Diaporthe	s__unclassified_g__Diaporthe	OTU545	92	0.000164239	0.333333
d__Eukaryota	k__Fungi	p__Ascomycota	c__Dothideomycetes	o__Botryosphaeriales	f__Botryosphaeriaceae	g__Neodeightonia	s__Neodeightonia_subglobosa	OTU1068	317	0.00056591	0.277778
d__Eukaryota	k__Fungi	p__Basidiomycota	c__Agaricomycetes	o__unclassified_c__Agaricomycetes	f__unclassified_c__Agaricomycetes	g__unclassified_c__Agaricomycetes	s__unclassified_c__Agaricomycetes	OTU766	25	4.46301e-05	0.0555556
d__Eukaryota	k__Fungi	p__Ascomycota	c__Sordariomycetes	o__Hypocreales	f__Nectriaceae	g__Fusarium	s__unclassified_g__Fusarium	OTU1410	4	7.14082e-06	0.0555556
d__Eukaryota	k__Fungi	p__Ascomycota	c__Eurotiomycetes	o__Chaetothyriales	f__Herpotrichiellaceae	g__Cladophialophora	s__unclassified_g__Cladophialophora	OTU328	2	3.57041e-06	0.0555556
d__Eukaryota	k__Fungi	p__Ascomycota	c__Dothideomycetes	o__Pleosporales	f__Periconiaceae	g__Periconia	s__Periconia_sp	OTU1203	3	5.35561e-06	0.0555556
d__Eukaryota	k__Fungi	p__Basidiomycota	c__Agaricomycetes	o__Thelephorales	f__Thelephoraceae	g__Thelephora	s__Thelephora_sp	OTU1312	5	8.92602e-06	0.0555556
d__Eukaryota	k__Fungi	p__Basidiomycota	c__unclassified_p__Basidiomycota	o__unclassified_p__Basidiomycota	f__unclassified_p__Basidiomycota	g__unclassified_p__Basidiomycota	s__unclassified_p__Basidiomycota	OTU1271	7	1.24964e-05	0.0555556
d__Eukaryota	k__Fungi	p__Basidiomycota	c__unclassified_p__Basidiomycota	o__unclassified_p__Basidiomycota	f__unclassified_p__Basidiomycota	g__unclassified_p__Basidiomycota	s__unclassified_p__Basidiomycota	OTU1270	2	3.57041e-06	0.0555556
d__Eukaryota	k__Fungi	p__Ascomycota	c__unclassified_p__Ascomycota	o__unclassified_p__Ascomycota	f__unclassified_p__Ascomycota	g__unclassified_p__Ascomycota	s__unclassified_p__Ascomycota	OTU1289	204	0.000364182	0.0555556
d__Eukaryota	k__Fungi	p__Ascomycota	c__Sordariomycetes	o__Xylariales	f__Xylariaceae	g__Hypoxylon	s__Hypoxylon_fendleri	OTU1367	7	1.24964e-05	0.0555556
d__Eukaryota	k__Fungi	p__Ascomycota	c__Dothideomycetes	o__Pleosporales	f__Periconiaceae	g__Periconia	s__Periconia_byssoides	OTU1179	359	0.000640888	0.277778
d__Eukaryota	k__Fungi	p__Ascomycota	c__Sordariomycetes	o__Xylariales	f__unclassified_o__Xylariales	g__unclassified_o__Xylariales	s__unclassified_o__Xylariales	OTU1415	1	1.7852e-06	0.0555556
d__Eukaryota	k__Fungi	p__Basidiomycota	c__Agaricomycetes	o__Polyporales	f__Ganodermataceae	g__Ganoderma	s__Ganoderma_gibbosum	OTU190	40	7.14082e-05	0.166667
d__Eukaryota	k__Fungi	p__Ascomycota	c__Sordariomycetes	o__Hypocreales	f__Hypocreales_fam_Incertae_sedis	g__Sarocladium	s__unclassified_g__Sarocladium	OTU1276	2	3.57041e-06	0.0555556
d__Eukaryota	k__Fungi	p__Basidiomycota	c__Agaricomycetes	o__Thelephorales	f__Thelephoraceae	g__unclassified_f__Thelephoraceae	s__unclassified_f__Thelephoraceae	OTU1469	5	8.92602e-06	0.166667
d__Eukaryota	k__Fungi	p__Ascomycota	c__Eurotiomycetes	o__Chaetothyriales	f__Cyphellophoraceae	g__Cyphellophora	s__Cyphellophora_jingdongensis	OTU498	12	2.14225e-05	0.111111
d__Eukaryota	k__Fungi	p__Ascomycota	c__Sordariomycetes	o__Hypocreales	f__Nectriaceae	g__Fusarium	s__unclassified_g__Fusarium	OTU985	46	8.21194e-05	0.222222
d__Eukaryota	k__Fungi	p__Ascomycota	c__Dothideomycetes	o__Pleosporales	f__Torulaceae	g__Torula	s__Torula_sp	OTU1030	1	1.7852e-06	0.0555556
d__Eukaryota	k__Fungi	p__Ascomycota	c__Dothideomycetes	o__Pleosporales	f__Phaeosphaeriaceae	g__unclassified_f__Phaeosphaeriaceae	s__unclassified_f__Phaeosphaeriaceae	OTU1772	22	3.92745e-05	0.111111
d__Eukaryota	k__Fungi	p__Ascomycota	c__Sordariomycetes	o__Xylariales	f__unclassified_o__Xylariales	g__unclassified_o__Xylariales	s__unclassified_o__Xylariales	OTU773	5	8.92602e-06	0.111111
d__Eukaryota	k__Fungi	p__unclassified_k__Fungi	c__unclassified_k__Fungi	o__unclassified_k__Fungi	f__unclassified_k__Fungi	g__unclassified_k__Fungi	s__unclassified_k__Fungi	OTU181	12	2.14225e-05	0.222222
d__Eukaryota	k__Fungi	p__Ascomycota	c__unclassified_p__Ascomycota	o__unclassified_p__Ascomycota	f__unclassified_p__Ascomycota	g__unclassified_p__Ascomycota	s__unclassified_p__Ascomycota	OTU1007	16	2.85633e-05	0.222222
d__Eukaryota	k__Fungi	p__Ascomycota	c__Dothideomycetes	o__Pleosporales	f__Teichosporaceae	g__Teichospora	s__Teichospora_thailandica	OTU2101	43	7.67638e-05	0.222222
d__Eukaryota	k__Fungi	p__Ascomycota	c__Sordariomycetes	o__Diaporthales	f__Diaporthaceae	g__Diaporthe	s__unclassified_g__Diaporthe	OTU782	2	3.57041e-06	0.0555556
d__Eukaryota	k__Fungi	p__Ascomycota	c__Sordariomycetes	o__Diaporthales	f__Diaporthaceae	g__Diaporthe	s__unclassified_g__Diaporthe	OTU781	3	5.35561e-06	0.0555556
d__Eukaryota	k__Fungi	p__Ascomycota	c__Eurotiomycetes	o__Chaetothyriales	f__Cyphellophoraceae	g__Cyphellophora	s__Cyphellophora_jingdongensis	OTU1376	5	8.92602e-06	0.0555556
d__Eukaryota	k__Fungi	p__Ascomycota	c__Dothideomycetes	o__Pleosporales	f__Phaeosphaeriaceae	g__Setophoma	s__unclassified_g__Setophoma	OTU137	64	0.000114253	0.0555556
d__Eukaryota	k__Fungi	p__Ascomycota	c__unclassified_p__Ascomycota	o__unclassified_p__Ascomycota	f__unclassified_p__Ascomycota	g__unclassified_p__Ascomycota	s__unclassified_p__Ascomycota	OTU1391	3	5.35561e-06	0.0555556
d__Eukaryota	k__Fungi	p__Basidiomycota	c__Agaricomycetes	o__Agaricales	f__Strophariaceae	g__Stropharia	s__Stropharia_sp	OTU988	8	1.42816e-05	0.111111
d__Eukaryota	k__Fungi	p__Ascomycota	c__Sordariomycetes	o__Sordariales	f__Sordariales_fam_Incertae_sedis	g__Conlarium	s__Conlarium_aquaticum	OTU1436	6	1.07112e-05	0.0555556
d__Eukaryota	k__Fungi	p__Ascomycota	c__Leotiomycetes	o__Helotiales	f__unclassified_o__Helotiales	g__unclassified_o__Helotiales	s__unclassified_o__Helotiales	OTU585	9	1.60668e-05	0.0555556
