# Supplementary material for: Community Structure and Diversity of Endophytic Fungi in Cultivated Polygala crotalarioides at Two Different Growth Stages Based on Culture-Independent and Culture-Based Methods
Source: J Fungi (Basel). 2024 Mar 4;10(3):195. doi: 10.3390/jof10030195 (PMC10970964; doi:10.3390/jof10030195)
Supplement: Supplementary file 1 [file jof-10-00195-s001.zip › Table S2 OTUs of endophytic fungi from 1-year P. crotalarioides.xlsx]

## Sheet: Table S2
Table S2 OTUs of endophytic fungi from 1-year P. crotalarioides
Domain	Kingdom	Phylum	Class	Order	Family	Genus	Species	OTU	Total	Percent	Prevalence
d__Eukaryota	k__Fungi	p__Ascomycota	c__Sordariomycetes	o__Xylariales	f__unclassified_o__Xylariales	g__unclassified_o__Xylariales	s__unclassified_o__Xylariales	OTU645	13	4.64e-05	0.1111
d__Eukaryota	k__Fungi	p__Ascomycota	c__Sordariomycetes	o__Hypocreales	f__Nectriaceae	g__Fusarium	s__unclassified_g__Fusarium	OTU1520	48034	0.171501	1
d__Eukaryota	k__Fungi	p__Ascomycota	c__Dothideomycetes	o__Capnodiales	f__Cladosporiaceae	g__Cladosporium	s__Cladosporium_sphaerospermum	OTU583	575	0.00205298	0.6667
d__Eukaryota	k__Fungi	p__unclassified_k__Fungi	c__unclassified_k__Fungi	o__unclassified_k__Fungi	f__unclassified_k__Fungi	g__unclassified_k__Fungi	s__unclassified_k__Fungi	OTU765	61	0.000217795	0.1111
d__Eukaryota	k__Fungi	p__unclassified_k__Fungi	c__unclassified_k__Fungi	o__unclassified_k__Fungi	f__unclassified_k__Fungi	g__unclassified_k__Fungi	s__unclassified_k__Fungi	OTU763	13	4.64e-05	0.2222
d__Eukaryota	k__Fungi	p__Ascomycota	c__Dothideomycetes	o__Pleosporales	f__Didymosphaeriaceae	g__Letendraea	s__Letendraea_helminthicola	OTU576	43	0.000153528	0.3333
d__Eukaryota	k__Fungi	p__Basidiomycota	c__Tremellomycetes	o__Tremellales	f__Bulleribasidiaceae	g__Vishniacozyma	s__unclassified_g__Vishniacozyma	OTU131	46	0.000164239	0.1111
d__Eukaryota	k__Fungi	p__Ascomycota	c__Sordariomycetes	o__unclassified_c__Sordariomycetes	f__unclassified_c__Sordariomycetes	g__unclassified_c__Sordariomycetes	s__unclassified_c__Sordariomycetes	OTU959	11	3.93e-05	0.1111
d__Eukaryota	k__Fungi	p__Ascomycota	c__Eurotiomycetes	o__Eurotiales	f__Trichocomaceae	g__Talaromyces	s__Talaromyces_stollii	OTU891	147	0.00052485	0.2222
d__Eukaryota	k__Fungi	p__Ascomycota	c__Sordariomycetes	o__Diaporthales	f__Diaporthaceae	g__Diaporthe	s__unclassified_g__Diaporthe	OTU793	6	2.14e-05	0.2222
d__Eukaryota	k__Fungi	p__Ascomycota	c__Sordariomycetes	o__Sordariales	f__Sordariales_fam_Incertae_sedis	g__Conlarium	s__Conlarium_aquaticum	OTU708	68	0.000242788	0.1111
d__Eukaryota	k__Fungi	p__Ascomycota	c__Sordariomycetes	o__Xylariales	f__Amphisphaeriaceae	g__Amphisphaeria	s__unclassified_g__Amphisphaeria	OTU733	66	0.000235647	0.1111
d__Eukaryota	k__Fungi	p__Basidiomycota	c__Agaricomycetes	o__Agaricales	f__Psathyrellaceae	g__Coprinopsis	s__Coprinopsis_sclerotiger	OTU587	28	0.0001	0.1111
d__Eukaryota	k__Fungi	p__Ascomycota	c__Sordariomycetes	o__Xylariales	f__Amphisphaeriaceae	g__Lepteutypa	s__unclassified_g__Lepteutypa	OTU559	3	1.07e-05	0.1111
d__Eukaryota	k__Fungi	p__Ascomycota	c__Pezizomycetes	o__Pezizales	f__Pezizaceae	g__unclassified_f__Pezizaceae	s__unclassified_f__Pezizaceae	OTU633	1	3.57e-06	0.1111
d__Eukaryota	k__Fungi	p__Ascomycota	c__unclassified_p__Ascomycota	o__unclassified_p__Ascomycota	f__unclassified_p__Ascomycota	g__unclassified_p__Ascomycota	s__unclassified_p__Ascomycota	OTU624	23626	0.0843545	0.7778
d__Eukaryota	k__Fungi	p__Ascomycota	c__Sordariomycetes	o__unclassified_c__Sordariomycetes	f__unclassified_c__Sordariomycetes	g__unclassified_c__Sordariomycetes	s__unclassified_c__Sordariomycetes	OTU564	78	0.000278492	0.2222
d__Eukaryota	k__Fungi	p__Ascomycota	c__Sordariomycetes	o__unclassified_c__Sordariomycetes	f__unclassified_c__Sordariomycetes	g__unclassified_c__Sordariomycetes	s__unclassified_c__Sordariomycetes	OTU769	5	1.79e-05	0.3333
d__Eukaryota	k__Fungi	p__Ascomycota	c__Dothideomycetes	o__Pleosporales	f__Didymosphaeriaceae	g__Letendraea	s__Letendraea_cordylinicola	OTU620	11	3.93e-05	0.1111
d__Eukaryota	k__Fungi	p__unclassified_k__Fungi	c__unclassified_k__Fungi	o__unclassified_k__Fungi	f__unclassified_k__Fungi	g__unclassified_k__Fungi	s__unclassified_k__Fungi	OTU772	23	8.21e-05	0.5556
d__Eukaryota	k__Fungi	p__Ascomycota	c__Sordariomycetes	o__Trichosphaeriales	f__Trichosphaeriaceae	g__Nigrospora	s__Nigrospora_oryzae	OTU2052	380	0.00135676	0.4444
d__Eukaryota	k__Fungi	p__unclassified_k__Fungi	c__unclassified_k__Fungi	o__unclassified_k__Fungi	f__unclassified_k__Fungi	g__unclassified_k__Fungi	s__unclassified_k__Fungi	OTU707	18	6.43e-05	0.1111
d__Eukaryota	k__Fungi	p__Ascomycota	c__Saccharomycetes	o__Saccharomycetales	f__Saccharomycetales_fam_Incertae_sedis	g__Candida	s__Candida_tropicalis	OTU899	10	3.57e-05	0.1111
d__Eukaryota	k__Fungi	p__Basidiomycota	c__Microbotryomycetes	o__Sporidiobolales	f__Sporidiobolaceae	g__Rhodotorula	s__Rhodotorula_mucilaginosa	OTU629	217	0.000774779	0.2222
d__Eukaryota	k__Fungi	p__Ascomycota	c__Sordariomycetes	o__Hypocreales	f__Hypocreales_fam_Incertae_sedis	g__Sarocladium	s__Sarocladium_strictum	OTU1059	1	3.57e-06	0.1111
d__Eukaryota	k__Fungi	p__Ascomycota	c__Sordariomycetes	o__Microascales	f__Microascaceae	g__Pithoascus	s__Pithoascus_sp	OTU670	9	3.21e-05	0.1111
d__Eukaryota	k__Fungi	p__Ascomycota	c__Dothideomycetes	o__Pleosporales	f__Massarinaceae	g__unclassified_f__Massarinaceae	s__unclassified_f__Massarinaceae	OTU739	44	0.000157098	0.1111
d__Eukaryota	k__Fungi	p__Basidiomycota	c__Agaricomycetes	o__Agaricales	f__Entolomataceae	g__Entoloma	s__unclassified_g__Entoloma	OTU759	323	0.00115324	0.2222
d__Eukaryota	k__Fungi	p__Basidiomycota	c__Agaricomycetes	o__Agaricales	f__Entolomataceae	g__Entoloma	s__unclassified_g__Entoloma	OTU599	4	1.43e-05	0.1111
d__Eukaryota	k__Fungi	p__Ascomycota	c__Leotiomycetes	o__Rhytismatales	f__Rhytismataceae	g__Leptostroma	s__Leptostroma_sp	OTU621	63	0.000224936	0.3333
d__Eukaryota	k__Fungi	p__Ascomycota	c__Sordariomycetes	o__Sordariales	f__Chaetomiaceae	g__unclassified_f__Chaetomiaceae	s__unclassified_f__Chaetomiaceae	OTU696	4025	0.0143709	0.3333
d__Eukaryota	k__Fungi	p__Basidiomycota	c__Cystobasidiomycetes	o__Cystobasidiales	f__Cystobasidiaceae	g__unclassified_f__Cystobasidiaceae	s__unclassified_f__Cystobasidiaceae	OTU732	25	8.93e-05	0.1111
d__Eukaryota	k__Fungi	p__Basidiomycota	c__Tremellomycetes	o__Tremellales	f__unclassified_o__Tremellales	g__unclassified_o__Tremellales	s__unclassified_o__Tremellales	OTU642	567	0.00202442	0.4444
d__Eukaryota	k__Fungi	p__Ascomycota	c__Sordariomycetes	o__unclassified_c__Sordariomycetes	f__unclassified_c__Sordariomycetes	g__unclassified_c__Sordariomycetes	s__unclassified_c__Sordariomycetes	OTU579	149	0.000531991	0.3333
d__Eukaryota	k__Fungi	p__Ascomycota	c__Sordariomycetes	o__Hypocreales	f__Hypocreales_fam_Incertae_sedis	g__Acremonium	s__Acremonium_charticola	OTU1514	50	0.00017852	0.3333
d__Eukaryota	k__Fungi	p__unclassified_k__Fungi	c__unclassified_k__Fungi	o__unclassified_k__Fungi	f__unclassified_k__Fungi	g__unclassified_k__Fungi	s__unclassified_k__Fungi	OTU747	9	3.21e-05	0.1111
d__Eukaryota	k__Fungi	p__Ascomycota	c__Dothideomycetes	o__Botryosphaeriales	f__Botryosphaeriaceae	g__Microdiplodia	s__Microdiplodia_miyakei	OTU2027	15	5.36e-05	0.2222
d__Eukaryota	k__Fungi	p__unclassified_k__Fungi	c__unclassified_k__Fungi	o__unclassified_k__Fungi	f__unclassified_k__Fungi	g__unclassified_k__Fungi	s__unclassified_k__Fungi	OTU698	2	7.14e-06	0.2222
d__Eukaryota	k__Fungi	p__unclassified_k__Fungi	c__unclassified_k__Fungi	o__unclassified_k__Fungi	f__unclassified_k__Fungi	g__unclassified_k__Fungi	s__unclassified_k__Fungi	OTU699	17	6.07e-05	0.1111
d__Eukaryota	k__Fungi	p__unclassified_k__Fungi	c__unclassified_k__Fungi	o__unclassified_k__Fungi	f__unclassified_k__Fungi	g__unclassified_k__Fungi	s__unclassified_k__Fungi	OTU694	2	7.14e-06	0.1111
d__Eukaryota	k__Fungi	p__unclassified_k__Fungi	c__unclassified_k__Fungi	o__unclassified_k__Fungi	f__unclassified_k__Fungi	g__unclassified_k__Fungi	s__unclassified_k__Fungi	OTU692	123	0.00043916	0.2222
d__Eukaryota	k__Fungi	p__Basidiomycota	c__Tremellomycetes	o__Cystofilobasidiales	f__Mrakiaceae	g__Tausonia	s__Tausonia_pullulans	OTU588	43	0.000153528	0.3333
d__Eukaryota	k__Fungi	p__unclassified_k__Fungi	c__unclassified_k__Fungi	o__unclassified_k__Fungi	f__unclassified_k__Fungi	g__unclassified_k__Fungi	s__unclassified_k__Fungi	OTU691	28	0.0001	0.1111
d__Eukaryota	k__Fungi	p__Basidiomycota	c__Microbotryomycetes	o__Leucosporidiales	f__unclassified_o__Leucosporidiales	g__unclassified_o__Leucosporidiales	s__Leucosporidiales_sp	OTU744	28	0.0001	0.1111
d__Eukaryota	k__Fungi	p__Basidiomycota	c__Malasseziomycetes	o__Malasseziales	f__Malasseziaceae	g__Malassezia	s__Malassezia_sp	OTU15	29	0.000103542	0.1111
d__Eukaryota	k__Fungi	p__Ascomycota	c__Dothideomycetes	o__Pleosporales	f__Didymellaceae	g__unclassified_f__Didymellaceae	s__unclassified_f__Didymellaceae	OTU757	17	6.07e-05	0.1111
d__Eukaryota	k__Fungi	p__Ascomycota	c__Sordariomycetes	o__Hypocreales	f__Hypocreales_fam_Incertae_sedis	g__Emericellopsis	s__Emericellopsis_terricola	OTU659	236	0.000842616	0.4444
d__Eukaryota	k__Fungi	p__Ascomycota	c__Sordariomycetes	o__Sordariales	f__unclassified_o__Sordariales	g__unclassified_o__Sordariales	s__unclassified_o__Sordariales	OTU556	24	8.57e-05	0.1111
d__Eukaryota	k__Fungi	p__Ascomycota	c__Dothideomycetes	o__Pleosporales	f__Pleosporaceae	g__Alternaria	s__unclassified_g__Alternaria	OTU1503	401	0.00143173	0.5556
d__Eukaryota	k__Fungi	p__Chytridiomycota	c__unclassified_p__Chytridiomycota	o__unclassified_p__Chytridiomycota	f__unclassified_p__Chytridiomycota	g__unclassified_p__Chytridiomycota	s__unclassified_p__Chytridiomycota	OTU609	3	1.07e-05	0.2222
d__Eukaryota	k__Fungi	p__Ascomycota	c__Sordariomycetes	o__unclassified_c__Sordariomycetes	f__unclassified_c__Sordariomycetes	g__unclassified_c__Sordariomycetes	s__unclassified_c__Sordariomycetes	OTU618	36	0.000128535	0.1111
d__Eukaryota	k__Fungi	p__Ascomycota	c__Sordariomycetes	o__Glomerellales	f__Plectosphaerellaceae	g__Gibellulopsis	s__Gibellulopsis_nigrescens	OTU560	203	0.000724793	0.3333
d__Eukaryota	k__Fungi	p__Ascomycota	c__Sordariomycetes	o__Xylariales	f__Amphisphaeriaceae	g__Amphisphaeria	s__unclassified_g__Amphisphaeria	OTU1651	1	3.57e-06	0.1111
d__Eukaryota	k__Fungi	p__Basidiomycota	c__Agaricomycetes	o__Agaricales	f__Strophariaceae	g__Psilocybe	s__Psilocybe_definita	OTU740	16	5.71e-05	0.1111
d__Eukaryota	k__Fungi	p__Ascomycota	c__Dothideomycetes	o__Pleosporales	f__Pleosporales_fam_Incertae_sedis	g__Astrosphaeriella	s__Astrosphaeriella_bakeriana	OTU547	31	0.000110683	0.1111
d__Eukaryota	k__Fungi	p__Ascomycota	c__Sordariomycetes	o__Sordariales	f__Sordariaceae	g__Gelasinospora	s__unclassified_g__Gelasinospora	OTU285	71	0.000253499	0.1111
d__Eukaryota	k__Fungi	p__Rozellomycota	c__unclassified_p__Rozellomycota	o__unclassified_p__Rozellomycota	f__unclassified_p__Rozellomycota	g__unclassified_p__Rozellomycota	s__Rozellomycota_sp	OTU711	12	4.28e-05	0.1111
d__Eukaryota	k__Fungi	p__Ascomycota	c__Sordariomycetes	o__Xylariales	f__Diatrypaceae	g__Peroneutypa	s__Peroneutypa_scoparia	OTU724	2	7.14e-06	0.1111
d__Eukaryota	k__Fungi	p__Ascomycota	c__Sordariomycetes	o__Glomerellales	f__unclassified_o__Glomerellales	g__unclassified_o__Glomerellales	s__unclassified_o__Glomerellales	OTU554	7	2.5e-05	0.3333
d__Eukaryota	k__Fungi	p__Ascomycota	c__Sordariomycetes	o__Diaporthales	f__Diaporthaceae	g__Diaporthe	s__unclassified_g__Diaporthe	OTU607	52	0.000185661	0.4444
d__Eukaryota	k__Fungi	p__Ascomycota	c__Dothideomycetes	o__Pleosporales	f__Phaeosphaeriaceae	g__Paraphoma	s__Paraphoma_radicina	OTU1557	1803	0.00643745	0.2222
d__Eukaryota	k__Fungi	p__Ascomycota	c__Sordariomycetes	o__Glomerellales	f__Glomerellaceae	g__Colletotrichum	s__unclassified_g__Colletotrichum	OTU960	5	1.79e-05	0.1111
d__Eukaryota	k__Fungi	p__Basidiomycota	c__unclassified_p__Basidiomycota	o__unclassified_p__Basidiomycota	f__unclassified_p__Basidiomycota	g__unclassified_p__Basidiomycota	s__unclassified_p__Basidiomycota	OTU454	3	1.07e-05	0.1111
d__Eukaryota	k__Fungi	p__Ascomycota	c__Leotiomycetes	o__Helotiales	f__Helotiaceae	g__Articulospora	s__Articulospora_sp	OTU50	23	8.21e-05	0.2222
d__Eukaryota	k__Fungi	p__Ascomycota	c__Dothideomycetes	o__Pleosporales	f__Didymellaceae	g__Boeremia	s__Boeremia_exigua	OTU386	1	3.57e-06	0.1111
d__Eukaryota	k__Fungi	p__unclassified_k__Fungi	c__unclassified_k__Fungi	o__unclassified_k__Fungi	f__unclassified_k__Fungi	g__unclassified_k__Fungi	s__unclassified_k__Fungi	OTU750	4	1.43e-05	0.1111
d__Eukaryota	k__Fungi	p__Ascomycota	c__Dothideomycetes	o__Pleosporales	f__Massarinaceae	g__Helminthosporium	s__Helminthosporium_velutinum	OTU628	558	0.00199229	0.5556
d__Eukaryota	k__Fungi	p__unclassified_k__Fungi	c__unclassified_k__Fungi	o__unclassified_k__Fungi	f__unclassified_k__Fungi	g__unclassified_k__Fungi	s__unclassified_k__Fungi	OTU615	337	0.00120323	0.6667
d__Eukaryota	k__Fungi	p__unclassified_k__Fungi	c__unclassified_k__Fungi	o__unclassified_k__Fungi	f__unclassified_k__Fungi	g__unclassified_k__Fungi	s__unclassified_k__Fungi	OTU612	2	7.14e-06	0.1111
d__Eukaryota	k__Fungi	p__Basidiomycota	c__unclassified_p__Basidiomycota	o__unclassified_p__Basidiomycota	f__unclassified_p__Basidiomycota	g__unclassified_p__Basidiomycota	s__unclassified_p__Basidiomycota	OTU146	86	0.000307055	0.1111
d__Eukaryota	k__Fungi	p__Ascomycota	c__Sordariomycetes	o__Glomerellales	f__Plectosphaerellaceae	g__Lectera	s__unclassified_g__Lectera	OTU582	25	8.93e-05	0.1111
d__Eukaryota	k__Fungi	p__Ascomycota	c__Sordariomycetes	o__Diaporthales	f__Diaporthaceae	g__Diaporthe	s__Diaporthe_melonis	OTU643	567	0.00202442	0.5556
d__Eukaryota	k__Fungi	p__unclassified_k__Fungi	c__unclassified_k__Fungi	o__unclassified_k__Fungi	f__unclassified_k__Fungi	g__unclassified_k__Fungi	s__unclassified_k__Fungi	OTU3	2	7.14e-06	0.2222
d__Eukaryota	k__Fungi	p__Ascomycota	c__Dothideomycetes	o__Pleosporales	f__Pleosporales_fam_Incertae_sedis	g__Dokmaia	s__Dokmaia_monthadangi	OTU1523	441	0.00157455	0.4444
d__Eukaryota	k__Fungi	p__Ascomycota	c__Eurotiomycetes	o__Eurotiales	f__Aspergillaceae	g__Penicillium	s__Penicillium_cordubense	OTU1546	1	3.57e-06	0.1111
d__Eukaryota	k__Fungi	p__Ascomycota	c__Dothideomycetes	o__Pleosporales	f__Didymellaceae	g__Didymella	s__Didymella_rosea	OTU470	22	7.85e-05	0.2222
d__Eukaryota	k__Fungi	p__Basidiomycota	c__Agaricomycetes	o__Agaricales	f__Bolbitiaceae	g__Panaeolus	s__unclassified_g__Panaeolus	OTU660	80	0.000285633	0.1111
d__Eukaryota	k__Fungi	p__Basidiomycota	c__Tremellomycetes	o__Tremellales	f__Rhynchogastremataceae	g__Papiliotrema	s__Papiliotrema_laurentii	OTU601	32	0.000114253	0.3333
d__Eukaryota	k__Fungi	p__unclassified_k__Fungi	c__unclassified_k__Fungi	o__unclassified_k__Fungi	f__unclassified_k__Fungi	g__unclassified_k__Fungi	s__unclassified_k__Fungi	OTU689	41	0.000146387	0.1111
d__Eukaryota	k__Fungi	p__unclassified_k__Fungi	c__unclassified_k__Fungi	o__unclassified_k__Fungi	f__unclassified_k__Fungi	g__unclassified_k__Fungi	s__unclassified_k__Fungi	OTU688	51	0.000182091	0.2222
d__Eukaryota	k__Fungi	p__unclassified_k__Fungi	c__unclassified_k__Fungi	o__unclassified_k__Fungi	f__unclassified_k__Fungi	g__unclassified_k__Fungi	s__unclassified_k__Fungi	OTU685	10	3.57e-05	0.1111
d__Eukaryota	k__Fungi	p__unclassified_k__Fungi	c__unclassified_k__Fungi	o__unclassified_k__Fungi	f__unclassified_k__Fungi	g__unclassified_k__Fungi	s__unclassified_k__Fungi	OTU684	1	3.57e-06	0.1111
d__Eukaryota	k__Fungi	p__unclassified_k__Fungi	c__unclassified_k__Fungi	o__unclassified_k__Fungi	f__unclassified_k__Fungi	g__unclassified_k__Fungi	s__unclassified_k__Fungi	OTU687	82	0.000292773	0.2222
d__Eukaryota	k__Fungi	p__unclassified_k__Fungi	c__unclassified_k__Fungi	o__unclassified_k__Fungi	f__unclassified_k__Fungi	g__unclassified_k__Fungi	s__unclassified_k__Fungi	OTU686	24	8.57e-05	0.2222
d__Eukaryota	k__Fungi	p__unclassified_k__Fungi	c__unclassified_k__Fungi	o__unclassified_k__Fungi	f__unclassified_k__Fungi	g__unclassified_k__Fungi	s__unclassified_k__Fungi	OTU681	27	9.64e-05	0.1111
d__Eukaryota	k__Fungi	p__unclassified_k__Fungi	c__unclassified_k__Fungi	o__unclassified_k__Fungi	f__unclassified_k__Fungi	g__unclassified_k__Fungi	s__unclassified_k__Fungi	OTU680	20	7.14e-05	0.1111
d__Eukaryota	k__Fungi	p__unclassified_k__Fungi	c__unclassified_k__Fungi	o__unclassified_k__Fungi	f__unclassified_k__Fungi	g__unclassified_k__Fungi	s__unclassified_k__Fungi	OTU683	10	3.57e-05	0.1111
d__Eukaryota	k__Fungi	p__Ascomycota	c__Sordariomycetes	o__unclassified_c__Sordariomycetes	f__unclassified_c__Sordariomycetes	g__unclassified_c__Sordariomycetes	s__unclassified_c__Sordariomycetes	OTU584	11	3.93e-05	0.1111
d__Eukaryota	k__Fungi	p__Ascomycota	c__Sordariomycetes	o__unclassified_c__Sordariomycetes	f__unclassified_c__Sordariomycetes	g__unclassified_c__Sordariomycetes	s__unclassified_c__Sordariomycetes	OTU589	4	1.43e-05	0.1111
d__Eukaryota	k__Fungi	p__Ascomycota	c__Sordariomycetes	o__Hypocreales	f__Cordycipitaceae	g__Beauveria	s__Beauveria_bassiana	OTU1504	1	3.57e-06	0.1111
d__Eukaryota	k__Fungi	p__Ascomycota	c__Dothideomycetes	o__Botryosphaeriales	f__Phyllostictaceae	g__Phyllosticta	s__Phyllosticta_capitalensis	OTU1516	1082	0.00386318	0.5556
d__Eukaryota	k__Fungi	p__Ascomycota	c__Saccharomycetes	o__Saccharomycetales	f__Saccharomycetales_fam_Incertae_sedis	g__Diutina	s__Diutina_catenulata	OTU555	86	0.000307055	0.3333
d__Eukaryota	k__Fungi	p__Basidiomycota	c__Malasseziomycetes	o__Malasseziales	f__Malasseziaceae	g__Malassezia	s__Malassezia_sp	OTU734	3	1.07e-05	0.1111
d__Eukaryota	k__Fungi	p__Ascomycota	c__Sordariomycetes	o__Glomerellales	f__Plectosphaerellaceae	g__Plectosphaerella	s__Plectosphaerella_sp	OTU590	27	9.64e-05	0.1111
d__Eukaryota	k__Fungi	p__Ascomycota	c__Sordariomycetes	o__Diaporthales	f__Diaporthaceae	g__Diaporthe	s__unclassified_g__Diaporthe	OTU636	152	0.000542702	0.6667
d__Eukaryota	k__Fungi	p__Ascomycota	c__Sordariomycetes	o__Diaporthales	f__Diaporthaceae	g__Diaporthe	s__Diaporthe_masirevicii	OTU2000	393	0.00140317	0.5556
d__Eukaryota	k__Fungi	p__Ascomycota	c__Sordariomycetes	o__Xylariales	f__Apiosporaceae	g__Arthrinium	s__Arthrinium_marii	OTU1597	195	0.00069623	0.1111
d__Eukaryota	k__Fungi	p__Basidiomycota	c__Tremellomycetes	o__Tremellales	f__Trimorphomycetaceae	g__Saitozyma	s__Saitozyma_sp	OTU927	14	5e-05	0.1111
d__Eukaryota	k__Fungi	p__Ascomycota	c__Eurotiomycetes	o__Chaetothyriales	f__Trichomeriaceae	g__Lithophila	s__Lithophila_guttulata	OTU728	1	3.57e-06	0.1111
d__Eukaryota	k__Fungi	p__Ascomycota	c__Dothideomycetes	o__Capnodiales	f__Cladosporiaceae	g__Cladosporium	s__Cladosporium_delicatulum	OTU1528	4653	0.0166131	0.8889
d__Eukaryota	k__Fungi	p__Ascomycota	c__Sordariomycetes	o__Glomerellales	f__Glomerellaceae	g__Colletotrichum	s__unclassified_g__Colletotrichum	OTU592	11	3.93e-05	0.1111
d__Eukaryota	k__Fungi	p__Ascomycota	c__Sordariomycetes	o__Hypocreales	f__Nectriaceae	g__Neocosmospora	s__Neocosmospora_rubicola	OTU1507	28	0.0001	0.3333
d__Eukaryota	k__Fungi	p__Ascomycota	c__Leotiomycetes	o__Helotiales	f__Helotiaceae	g__Scytalidium	s__Scytalidium_circinatum	OTU126	25	8.93e-05	0.1111
d__Eukaryota	k__Fungi	p__Ascomycota	c__Dothideomycetes	o__Pleosporales	f__Phaeosphaeriaceae	g__unclassified_f__Phaeosphaeriaceae	s__unclassified_f__Phaeosphaeriaceae	OTU2111	8	2.86e-05	0.1111
d__Eukaryota	k__Fungi	p__Basidiomycota	c__Microbotryomycetes	o__Sporidiobolales	f__Sporidiobolaceae	g__Rhodotorula	s__Rhodotorula_paludigena	OTU604	121	0.000432019	0.4444
d__Eukaryota	k__Fungi	p__unclassified_k__Fungi	c__unclassified_k__Fungi	o__unclassified_k__Fungi	f__unclassified_k__Fungi	g__unclassified_k__Fungi	s__unclassified_k__Fungi	OTU1509	17	6.07e-05	0.1111
d__Eukaryota	k__Fungi	p__Basidiomycota	c__Ustilaginomycetes	o__Ustilaginales	f__Ustilaginaceae	g__Moesziomyces	s__unclassified_g__Moesziomyces	OTU1487	7	2.5e-05	0.1111
d__Eukaryota	k__Fungi	p__Basidiomycota	c__Agaricomycetes	o__Polyporales	f__Meruliaceae	g__Emmia	s__Emmia_sp	OTU602	5	1.79e-05	0.1111
d__Eukaryota	k__Fungi	p__Ascomycota	c__Sordariomycetes	o__Xylariales	f__Apiosporaceae	g__Arthrinium	s__Arthrinium_rasikravindrae	OTU622	118	0.000421308	0.3333
d__Eukaryota	k__Fungi	p__Ascomycota	c__Sordariomycetes	o__Diaporthales	f__unclassified_o__Diaporthales	g__unclassified_o__Diaporthales	s__unclassified_o__Diaporthales	OTU600	2	7.14e-06	0.1111
d__Eukaryota	k__Fungi	p__Ascomycota	c__Dothideomycetes	o__Capnodiales	f__Mycosphaerellaceae	g__Cercospora	s__unclassified_g__Cercospora	OTU1510	1902	0.00679092	0.3333
d__Eukaryota	k__Fungi	p__Basidiomycota	c__Agaricomycetes	o__Agaricales	f__Bolbitiaceae	g__Panaeolus	s__Panaeolus_papilionaceus	OTU652	25	8.93e-05	0.1111
d__Eukaryota	k__Fungi	p__Ascomycota	c__Sordariomycetes	o__unclassified_c__Sordariomycetes	f__unclassified_c__Sordariomycetes	g__unclassified_c__Sordariomycetes	s__unclassified_c__Sordariomycetes	OTU755	5	1.79e-05	0.1111
d__Eukaryota	k__Fungi	p__Ascomycota	c__Sordariomycetes	o__unclassified_c__Sordariomycetes	f__unclassified_c__Sordariomycetes	g__unclassified_c__Sordariomycetes	s__unclassified_c__Sordariomycetes	OTU758	1	3.57e-06	0.1111
d__Eukaryota	k__Fungi	p__Ascomycota	c__Sordariomycetes	o__Xylariales	f__Xylariaceae	g__Biscogniauxia	s__Biscogniauxia_atropunctata	OTU562	5	1.79e-05	0.1111
d__Eukaryota	k__Fungi	p__Ascomycota	c__Sordariomycetes	o__Hypocreales	f__Cordycipitaceae	g__Lecanicillium	s__Lecanicillium_subprimulinum	OTU679	18	6.43e-05	0.1111
d__Eukaryota	k__Fungi	p__Ascomycota	c__Saccharomycetes	o__Saccharomycetales	f__unclassified_o__Saccharomycetales	g__unclassified_o__Saccharomycetales	s__unclassified_o__Saccharomycetales	OTU1505	2486	0.00887603	1
d__Eukaryota	k__Fungi	p__Ascomycota	c__Sordariomycetes	o__Phyllachorales	f__Telimenaceae	g__Telimena	s__Telimena_sp	OTU594	15	5.36e-05	0.2222
d__Eukaryota	k__Fungi	p__Ascomycota	c__Dothideomycetes	o__Pleosporales	f__Didymosphaeriaceae	g__Pseudopithomyces	s__Pseudopithomyces_chartarum	OTU2100	10	3.57e-05	0.1111
d__Eukaryota	k__Fungi	p__Ascomycota	c__Sordariomycetes	o__Boliniales	f__Boliniales_fam_Incertae_sedis	g__Paramicrothyrium	s__Paramicrothyrium_sp	OTU1526	360	0.00128535	0.5556
d__Eukaryota	k__Fungi	p__Ascomycota	c__Sordariomycetes	o__Microascales	f__Halosphaeriaceae	g__Aniptodera	s__Aniptodera_chesapeakensis	OTU742	3	1.07e-05	0.1111
d__Eukaryota	k__Fungi	p__Basidiomycota	c__Agaricomycetes	o__Agaricales	f__Psathyrellaceae	g__Coprinopsis	s__Coprinopsis_sp	OTU605	43	0.000153528	0.1111
d__Eukaryota	k__Fungi	p__Ascomycota	c__Sordariomycetes	o__Xylariales	f__unclassified_o__Xylariales	g__unclassified_o__Xylariales	s__unclassified_o__Xylariales	OTU1484	680	0.00242788	0.5556
d__Eukaryota	k__Fungi	p__Ascomycota	c__Sordariomycetes	o__unclassified_c__Sordariomycetes	f__unclassified_c__Sordariomycetes	g__unclassified_c__Sordariomycetes	s__unclassified_c__Sordariomycetes	OTU726	1	3.57e-06	0.1111
d__Eukaryota	k__Fungi	p__Ascomycota	c__Sordariomycetes	o__unclassified_c__Sordariomycetes	f__unclassified_c__Sordariomycetes	g__unclassified_c__Sordariomycetes	s__unclassified_c__Sordariomycetes	OTU616	36	0.000128535	0.2222
d__Eukaryota	k__Fungi	p__Ascomycota	c__Dothideomycetes	o__Pleosporales	f__Phaeosphaeriaceae	g__Leptospora	s__Leptospora_rubella	OTU1949	14	5e-05	0.1111
d__Eukaryota	k__Fungi	p__Ascomycota	c__Sordariomycetes	o__Xylariales	f__Microdochiaceae	g__Microdochium	s__Microdochium_colombiense	OTU1947	176	0.000628392	0.2222
d__Eukaryota	k__Fungi	p__Basidiomycota	c__Cystobasidiomycetes	o__Cystobasidiales	f__Cystobasidiaceae	g__Cystobasidium	s__Cystobasidium_minuta	OTU1660	27	9.64e-05	0.1111
d__Eukaryota	k__Fungi	p__Ascomycota	c__Eurotiomycetes	o__Chaetothyriales	f__Trichomeriaceae	g__Knufia	s__Knufia_tsunedae	OTU577	2	7.14e-06	0.2222
d__Eukaryota	k__Fungi	p__Ascomycota	c__Sordariomycetes	o__Glomerellales	f__Glomerellaceae	g__Colletotrichum	s__unclassified_g__Colletotrichum	OTU574	2	7.14e-06	0.1111
d__Eukaryota	k__Fungi	p__Ascomycota	c__Dothideomycetes	o__Pleosporales	f__Lophiostomataceae	g__Lophiostoma	s__Lophiostoma_macrostomum	OTU2001	1	3.57e-06	0.1111
d__Eukaryota	k__Fungi	p__Ascomycota	c__Sordariomycetes	o__Boliniales	f__Boliniales_fam_Incertae_sedis	g__Paramicrothyrium	s__Paramicrothyrium_sp	OTU1937	15	5.36e-05	0.1111
d__Eukaryota	k__Fungi	p__Ascomycota	c__Sordariomycetes	o__Glomerellales	f__Glomerellaceae	g__Colletotrichum	s__Colletotrichum_boninense	OTU657	124	0.000442731	0.4444
d__Eukaryota	k__Fungi	p__Ascomycota	c__Sordariomycetes	o__Hypocreales	f__Hypocreales_fam_Incertae_sedis	g__Sarocladium	s__unclassified_g__Sarocladium	OTU1481	27	9.64e-05	0.1111
d__Eukaryota	k__Fungi	p__Ascomycota	c__Sordariomycetes	o__Sordariales	f__Chaetomiaceae	g__Zopfiella	s__Zopfiella_sp	OTU649	31	0.000110683	0.2222
d__Eukaryota	k__Fungi	p__Ascomycota	c__Sordariomycetes	o__unclassified_c__Sordariomycetes	f__unclassified_c__Sordariomycetes	g__unclassified_c__Sordariomycetes	s__unclassified_c__Sordariomycetes	OTU735	6	2.14e-05	0.1111
d__Eukaryota	k__Fungi	p__Ascomycota	c__Dothideomycetes	o__Pleosporales	f__Pleosporaceae	g__Stemphylium	s__unclassified_g__Stemphylium	OTU1501	175	0.000624821	0.1111
d__Eukaryota	k__Fungi	p__Ascomycota	c__Sordariomycetes	o__Diaporthales	f__Diaporthaceae	g__Diaporthe	s__unclassified_g__Diaporthe	OTU1032	20	7.14e-05	0.2222
d__Eukaryota	k__Fungi	p__Ascomycota	c__Dothideomycetes	o__Pleosporales	f__Didymellaceae	g__Phoma	s__Phoma_adonidicola	OTU1694	17	6.07e-05	0.2222
d__Eukaryota	k__Fungi	p__unclassified_k__Fungi	c__unclassified_k__Fungi	o__unclassified_k__Fungi	f__unclassified_k__Fungi	g__unclassified_k__Fungi	s__unclassified_k__Fungi	OTU651	2940	0.010497	1
d__Eukaryota	k__Fungi	p__Ascomycota	c__Sordariomycetes	o__unclassified_c__Sordariomycetes	f__unclassified_c__Sordariomycetes	g__unclassified_c__Sordariomycetes	s__unclassified_c__Sordariomycetes	OTU112	37	0.000132105	0.1111
d__Eukaryota	k__Fungi	p__Ascomycota	c__Sordariomycetes	o__Phomatosporales	f__Phomatosporaceae	g__Phomatospora	s__unclassified_g__Phomatospora	OTU558	6	2.14e-05	0.1111
d__Eukaryota	k__Fungi	p__Basidiomycota	c__Tremellomycetes	o__Trichosporonales	f__Trichosporonaceae	g__Cutaneotrichosporon	s__Cutaneotrichosporon_curvatus	OTU1511	523	0.00186732	0.6667
d__Eukaryota	k__Fungi	p__Ascomycota	c__Dothideomycetes	o__Pleosporales	f__Didymellaceae	g__unclassified_f__Didymellaceae	s__unclassified_f__Didymellaceae	OTU1502	326	0.00116395	0.6667
d__Eukaryota	k__Fungi	p__Ascomycota	c__Dothideomycetes	o__Pleosporales	f__Didymellaceae	g__unclassified_f__Didymellaceae	s__unclassified_f__Didymellaceae	OTU844	1	3.57e-06	0.1111
d__Eukaryota	k__Fungi	p__unclassified_k__Fungi	c__unclassified_k__Fungi	o__unclassified_k__Fungi	f__unclassified_k__Fungi	g__unclassified_k__Fungi	s__unclassified_k__Fungi	OTU682	25	8.93e-05	0.1111
d__Eukaryota	k__Fungi	p__Ascomycota	c__Dothideomycetes	o__Pleosporales	f__Didymosphaeriaceae	g__Letendraea	s__Letendraea_cordylinicola	OTU596	12	4.28e-05	0.1111
d__Eukaryota	k__Fungi	p__Basidiomycota	c__Microbotryomycetes	o__Sporidiobolales	f__Sporidiobolaceae	g__Sporidiobolus	s__Sporidiobolus_pararoseus	OTU608	126	0.000449871	0.1111
d__Eukaryota	k__Fungi	p__Ascomycota	c__Dothideomycetes	o__Venturiales	f__Sympoventuriaceae	g__Ochroconis	s__Ochroconis_mirabilis	OTU2045	43	0.000153528	0.2222
d__Eukaryota	k__Fungi	p__Ascomycota	c__Eurotiomycetes	o__Chaetothyriales	f__Cyphellophoraceae	g__Cyphellophora	s__Cyphellophora_oxyspora	OTU1894	26	9.28e-05	0.2222
d__Eukaryota	k__Fungi	p__unclassified_k__Fungi	c__unclassified_k__Fungi	o__unclassified_k__Fungi	f__unclassified_k__Fungi	g__unclassified_k__Fungi	s__unclassified_k__Fungi	OTU907	3	1.07e-05	0.2222
d__Eukaryota	k__Fungi	p__Ascomycota	c__Sordariomycetes	o__unclassified_c__Sordariomycetes	f__unclassified_c__Sordariomycetes	g__unclassified_c__Sordariomycetes	s__unclassified_c__Sordariomycetes	OTU736	332	0.00118538	0.1111
d__Eukaryota	k__Fungi	p__Ascomycota	c__unclassified_p__Ascomycota	o__unclassified_p__Ascomycota	f__unclassified_p__Ascomycota	g__unclassified_p__Ascomycota	s__unclassified_p__Ascomycota	OTU543	1213	0.00433091	0.3333
d__Eukaryota	k__Fungi	p__Ascomycota	c__Dothideomycetes	o__Botryosphaeriales	f__Botryosphaeriaceae	g__unclassified_f__Botryosphaeriaceae	s__unclassified_f__Botryosphaeriaceae	OTU746	15	5.36e-05	0.1111
d__Eukaryota	k__Fungi	p__Ascomycota	c__Sordariomycetes	o__Xylariales	f__unclassified_o__Xylariales	g__unclassified_o__Xylariales	s__unclassified_o__Xylariales	OTU573	2	7.14e-06	0.1111
d__Eukaryota	k__Fungi	p__Ascomycota	c__unclassified_p__Ascomycota	o__unclassified_p__Ascomycota	f__unclassified_p__Ascomycota	g__unclassified_p__Ascomycota	s__unclassified_p__Ascomycota	OTU644	28	0.0001	0.1111
d__Eukaryota	k__Fungi	p__unclassified_k__Fungi	c__unclassified_k__Fungi	o__unclassified_k__Fungi	f__unclassified_k__Fungi	g__unclassified_k__Fungi	s__unclassified_k__Fungi	OTU471	342	0.00122108	0.6667
d__Eukaryota	k__Fungi	p__Basidiomycota	c__Agaricomycetes	o__Agaricales	f__Psathyrellaceae	g__Coprinellus	s__Coprinellus_aureogranulatus	OTU753	76	0.000271351	0.2222
d__Eukaryota	k__Fungi	p__Ascomycota	c__Sordariomycetes	o__Xylariales	f__Xylariaceae	g__Xylaria	s__Xylaria_grammica	OTU1323	3	1.07e-05	0.1111
d__Eukaryota	k__Fungi	p__unclassified_k__Fungi	c__unclassified_k__Fungi	o__unclassified_k__Fungi	f__unclassified_k__Fungi	g__unclassified_k__Fungi	s__unclassified_k__Fungi	OTU1098	19	6.78e-05	0.1111
d__Eukaryota	k__Fungi	p__Ascomycota	c__Sordariomycetes	o__unclassified_c__Sordariomycetes	f__unclassified_c__Sordariomycetes	g__unclassified_c__Sordariomycetes	s__unclassified_c__Sordariomycetes	OTU638	57	0.000203513	0.2222
d__Eukaryota	k__Fungi	p__Ascomycota	c__Sordariomycetes	o__Trichosphaeriales	f__Trichosphaeriaceae	g__Nigrospora	s__Nigrospora_sp	OTU455	9	3.21e-05	0.1111
d__Eukaryota	k__Fungi	p__Ascomycota	c__Sordariomycetes	o__Microascales	f__Ceratocystidaceae	g__unclassified_f__Ceratocystidaceae	s__unclassified_f__Ceratocystidaceae	OTU570	5739	0.0204906	0.5556
d__Eukaryota	k__Fungi	p__unclassified_k__Fungi	c__unclassified_k__Fungi	o__unclassified_k__Fungi	f__unclassified_k__Fungi	g__unclassified_k__Fungi	s__unclassified_k__Fungi	OTU13	6	2.14e-05	0.4444
d__Eukaryota	k__Fungi	p__unclassified_k__Fungi	c__unclassified_k__Fungi	o__unclassified_k__Fungi	f__unclassified_k__Fungi	g__unclassified_k__Fungi	s__unclassified_k__Fungi	OTU12	3	1.07e-05	0.1111
d__Eukaryota	k__Fungi	p__Ascomycota	c__Dothideomycetes	o__Pleosporales	f__Sporormiaceae	g__unclassified_f__Sporormiaceae	s__unclassified_f__Sporormiaceae	OTU883	65	0.000232077	0.1111
d__Eukaryota	k__Fungi	p__Basidiomycota	c__Agaricomycetes	o__Auriculariales	f__unclassified_o__Auriculariales	g__unclassified_o__Auriculariales	s__Auriculariales_sp	OTU716	154	0.000549843	0.1111
d__Eukaryota	k__Fungi	p__Basidiomycota	c__Microbotryomycetes	o__Sporidiobolales	f__Sporidiobolaceae	g__Rhodotorula	s__Rhodotorula_babjevae	OTU572	203	0.000724793	0.3333
d__Eukaryota	k__Fungi	p__Ascomycota	c__Sordariomycetes	o__Xylariales	f__Xylariaceae	g__unclassified_f__Xylariaceae	s__unclassified_f__Xylariaceae	OTU656	17	6.07e-05	0.1111
d__Eukaryota	k__Fungi	p__Ascomycota	c__Dothideomycetes	o__Pleosporales	f__unclassified_o__Pleosporales	g__unclassified_o__Pleosporales	s__unclassified_o__Pleosporales	OTU1493	13695	0.0488967	1
d__Eukaryota	k__Fungi	p__Ascomycota	c__Eurotiomycetes	o__Eurotiales	f__Aspergillaceae	g__Aspergillus	s__unclassified_g__Aspergillus	OTU814	4	1.43e-05	0.1111
d__Eukaryota	k__Fungi	p__Ascomycota	c__Eurotiomycetes	o__Eurotiales	f__Aspergillaceae	g__Aspergillus	s__Aspergillus_cibarius	OTU690	1801	0.00643031	0.4444
d__Eukaryota	k__Fungi	p__Ascomycota	c__Eurotiomycetes	o__Eurotiales	f__Aspergillaceae	g__Aspergillus	s__Aspergillus_penicillioides	OTU580	91	0.000324907	0.3333
d__Eukaryota	k__Fungi	p__Ascomycota	c__Dothideomycetes	o__Pleosporales	f__Pleosporaceae	g__Bipolaris	s__Bipolaris_yamadae	OTU611	4	1.43e-05	0.1111
d__Eukaryota	k__Fungi	p__unclassified_k__Fungi	c__unclassified_k__Fungi	o__unclassified_k__Fungi	f__unclassified_k__Fungi	g__unclassified_k__Fungi	s__unclassified_k__Fungi	OTU646	12	4.28e-05	0.1111
d__Eukaryota	k__Fungi	p__unclassified_k__Fungi	c__unclassified_k__Fungi	o__unclassified_k__Fungi	f__unclassified_k__Fungi	g__unclassified_k__Fungi	s__unclassified_k__Fungi	OTU884	1	3.57e-06	0.1111
d__Eukaryota	k__Fungi	p__Basidiomycota	c__Tremellomycetes	o__Tremellales	f__Bulleribasidiaceae	g__Vishniacozyma	s__Vishniacozyma_taibaiensis	OTU1156	2	7.14e-06	0.1111
d__Eukaryota	k__Fungi	p__Ascomycota	c__Sordariomycetes	o__Sordariales	f__Chaetomiaceae	g__Gilmaniella	s__Gilmaniella_subornata	OTU727	1	3.57e-06	0.1111
d__Eukaryota	k__Fungi	p__Basidiomycota	c__Agaricomycetes	o__Russulales	f__Peniophoraceae	g__Peniophora	s__Peniophora_sp	OTU695	88	0.000314196	0.1111
d__Eukaryota	k__Fungi	p__Ascomycota	c__Sordariomycetes	o__Sordariales	f__Chaetomiaceae	g__Chaetomium	s__unclassified_g__Chaetomium	OTU737	28	0.0001	0.1111
d__Eukaryota	k__Fungi	p__Ascomycota	c__Dothideomycetes	o__Pleosporales	f__Phaeosphaeriaceae	g__unclassified_f__Phaeosphaeriaceae	s__unclassified_f__Phaeosphaeriaceae	OTU2084	34	0.000121394	0.1111
d__Eukaryota	k__Fungi	p__unclassified_k__Fungi	c__unclassified_k__Fungi	o__unclassified_k__Fungi	f__unclassified_k__Fungi	g__unclassified_k__Fungi	s__unclassified_k__Fungi	OTU851	27	9.64e-05	0.2222
d__Eukaryota	k__Fungi	p__Ascomycota	c__Sordariomycetes	o__Trichosphaeriales	f__Trichosphaeriaceae	g__Nigrospora	s__Nigrospora_oryzae	OTU143	7	2.5e-05	0.1111
d__Eukaryota	k__Fungi	p__Ascomycota	c__Leotiomycetes	o__Helotiales	f__Chaetomellaceae	g__Chaetomella	s__Chaetomella_raphigera	OTU650	2466	0.00880463	0.7778
d__Eukaryota	k__Fungi	p__Ascomycota	c__Dothideomycetes	o__Hysteriales	f__Hysteriaceae	g__Rhytidhysteron	s__Rhytidhysteron_thailandicum	OTU2035	1	3.57e-06	0.1111
d__Eukaryota	k__Fungi	p__Ascomycota	c__Dothideomycetes	o__Pleosporales	f__Sporormiaceae	g__unclassified_f__Sporormiaceae	s__unclassified_f__Sporormiaceae	OTU672	33	0.000117823	0.4444
d__Eukaryota	k__Fungi	p__Basidiomycota	c__Cystobasidiomycetes	o__Cystobasidiomycetes_ord_Incertae_sedis	f__Symmetrosporaceae	g__Symmetrospora	s__Symmetrospora_symmetrica	OTU719	169	0.000603399	0.1111
d__Eukaryota	k__Fungi	p__Ascomycota	c__Dothideomycetes	o__Pleosporales	f__unclassified_o__Pleosporales	g__unclassified_o__Pleosporales	s__unclassified_o__Pleosporales	OTU378	9	3.21e-05	0.1111
d__Eukaryota	k__Fungi	p__unclassified_k__Fungi	c__unclassified_k__Fungi	o__unclassified_k__Fungi	f__unclassified_k__Fungi	g__unclassified_k__Fungi	s__unclassified_k__Fungi	OTU586	125	0.000446301	0.2222
d__Eukaryota	k__Fungi	p__Ascomycota	c__Sordariomycetes	o__Xylariales	f__unclassified_o__Xylariales	g__unclassified_o__Xylariales	s__unclassified_o__Xylariales	OTU557	5	1.79e-05	0.1111
d__Eukaryota	k__Fungi	p__Ascomycota	c__Sordariomycetes	o__Glomerellales	f__Glomerellaceae	g__Colletotrichum	s__unclassified_g__Colletotrichum	OTU640	694	0.00247786	0.5556
d__Eukaryota	k__Fungi	p__Ascomycota	c__Dothideomycetes	o__Pleosporales	f__Phaeosphaeriaceae	g__Leptospora	s__Leptospora_sp	OTU785	62	0.000221365	0.1111
d__Eukaryota	k__Fungi	p__Basidiomycota	c__Agaricomycetes	o__Polyporales	f__Hyphodermataceae	g__Hyphoderma	s__Hyphoderma_sp	OTU563	7	2.5e-05	0.1111
d__Eukaryota	k__Fungi	p__unclassified_k__Fungi	c__unclassified_k__Fungi	o__unclassified_k__Fungi	f__unclassified_k__Fungi	g__unclassified_k__Fungi	s__unclassified_k__Fungi	OTU678	6	2.14e-05	0.1111
d__Eukaryota	k__Fungi	p__unclassified_k__Fungi	c__unclassified_k__Fungi	o__unclassified_k__Fungi	f__unclassified_k__Fungi	g__unclassified_k__Fungi	s__unclassified_k__Fungi	OTU674	7	2.5e-05	0.1111
d__Eukaryota	k__Fungi	p__unclassified_k__Fungi	c__unclassified_k__Fungi	o__unclassified_k__Fungi	f__unclassified_k__Fungi	g__unclassified_k__Fungi	s__unclassified_k__Fungi	OTU675	23	8.21e-05	0.1111
d__Eukaryota	k__Fungi	p__unclassified_k__Fungi	c__unclassified_k__Fungi	o__unclassified_k__Fungi	f__unclassified_k__Fungi	g__unclassified_k__Fungi	s__unclassified_k__Fungi	OTU676	7	2.5e-05	0.1111
d__Eukaryota	k__Fungi	p__unclassified_k__Fungi	c__unclassified_k__Fungi	o__unclassified_k__Fungi	f__unclassified_k__Fungi	g__unclassified_k__Fungi	s__unclassified_k__Fungi	OTU677	35	0.000124964	0.1111
d__Eukaryota	k__Fungi	p__unclassified_k__Fungi	c__unclassified_k__Fungi	o__unclassified_k__Fungi	f__unclassified_k__Fungi	g__unclassified_k__Fungi	s__unclassified_k__Fungi	OTU671	50	0.00017852	0.2222
d__Eukaryota	k__Fungi	p__unclassified_k__Fungi	c__unclassified_k__Fungi	o__unclassified_k__Fungi	f__unclassified_k__Fungi	g__unclassified_k__Fungi	s__unclassified_k__Fungi	OTU673	28	0.0001	0.1111
d__Eukaryota	k__Fungi	p__Ascomycota	c__Sordariomycetes	o__Hypocreales	f__Cordycipitaceae	g__Simplicillium	s__Simplicillium_sp	OTU610	23	8.21e-05	0.1111
d__Eukaryota	k__Fungi	p__Ascomycota	c__Dothideomycetes	o__Pleosporales	f__Sporormiaceae	g__Sporormiella	s__Sporormiella_minima	OTU1522	4312	0.0153956	0.5556
d__Eukaryota	k__Fungi	p__Ascomycota	c__Sordariomycetes	o__Xylariales	f__Xylariales_fam_Incertae_sedis	g__Ceratostomella	s__Ceratostomella_cuspidata	OTU770	6	2.14e-05	0.1111
d__Eukaryota	k__Fungi	p__Ascomycota	c__Sordariomycetes	o__Xylariales	f__Xylariaceae	g__unclassified_f__Xylariaceae	s__unclassified_f__Xylariaceae	OTU1585	7	2.5e-05	0.1111
d__Eukaryota	k__Fungi	p__Ascomycota	c__Eurotiomycetes	o__Eurotiales	f__Aspergillaceae	g__Aspergillus	s__Aspergillus_penicillioides	OTU1598	45	0.000160668	0.1111
d__Eukaryota	k__Fungi	p__unclassified_k__Fungi	c__unclassified_k__Fungi	o__unclassified_k__Fungi	f__unclassified_k__Fungi	g__unclassified_k__Fungi	s__unclassified_k__Fungi	OTU665	65	0.000232077	0.1111
d__Eukaryota	k__Fungi	p__unclassified_k__Fungi	c__unclassified_k__Fungi	o__unclassified_k__Fungi	f__unclassified_k__Fungi	g__unclassified_k__Fungi	s__unclassified_k__Fungi	OTU663	9	3.21e-05	0.1111
d__Eukaryota	k__Fungi	p__unclassified_k__Fungi	c__unclassified_k__Fungi	o__unclassified_k__Fungi	f__unclassified_k__Fungi	g__unclassified_k__Fungi	s__unclassified_k__Fungi	OTU662	20	7.14e-05	0.1111
d__Eukaryota	k__Fungi	p__unclassified_k__Fungi	c__unclassified_k__Fungi	o__unclassified_k__Fungi	f__unclassified_k__Fungi	g__unclassified_k__Fungi	s__unclassified_k__Fungi	OTU661	33	0.000117823	0.1111
d__Eukaryota	k__Fungi	p__unclassified_k__Fungi	c__unclassified_k__Fungi	o__unclassified_k__Fungi	f__unclassified_k__Fungi	g__unclassified_k__Fungi	s__unclassified_k__Fungi	OTU667	13	4.64e-05	0.1111
d__Eukaryota	k__Fungi	p__unclassified_k__Fungi	c__unclassified_k__Fungi	o__unclassified_k__Fungi	f__unclassified_k__Fungi	g__unclassified_k__Fungi	s__unclassified_k__Fungi	OTU664	37	0.000132105	0.4444
d__Eukaryota	k__Fungi	p__unclassified_k__Fungi	c__unclassified_k__Fungi	o__unclassified_k__Fungi	f__unclassified_k__Fungi	g__unclassified_k__Fungi	s__unclassified_k__Fungi	OTU669	37	0.000132105	0.3333
d__Eukaryota	k__Fungi	p__unclassified_k__Fungi	c__unclassified_k__Fungi	o__unclassified_k__Fungi	f__unclassified_k__Fungi	g__unclassified_k__Fungi	s__unclassified_k__Fungi	OTU668	13	4.64e-05	0.1111
d__Eukaryota	k__Fungi	p__Ascomycota	c__Sordariomycetes	o__Xylariales	f__unclassified_o__Xylariales	g__unclassified_o__Xylariales	s__unclassified_o__Xylariales	OTU1196	6	2.14e-05	0.1111
d__Eukaryota	k__Fungi	p__Ascomycota	c__Pezizomycetes	o__Pezizales	f__Pezizaceae	g__Oedocephalum	s__Oedocephalum_sp	OTU597	7	2.5e-05	0.1111
d__Eukaryota	k__Fungi	p__unclassified_k__Fungi	c__unclassified_k__Fungi	o__unclassified_k__Fungi	f__unclassified_k__Fungi	g__unclassified_k__Fungi	s__unclassified_k__Fungi	OTU595	18	6.43e-05	0.1111
d__Eukaryota	k__Fungi	p__Ascomycota	c__Sordariomycetes	o__unclassified_c__Sordariomycetes	f__unclassified_c__Sordariomycetes	g__unclassified_c__Sordariomycetes	s__unclassified_c__Sordariomycetes	OTU658	21	7.5e-05	0.1111
d__Eukaryota	k__Fungi	p__Ascomycota	c__Sordariomycetes	o__unclassified_c__Sordariomycetes	f__unclassified_c__Sordariomycetes	g__unclassified_c__Sordariomycetes	s__unclassified_c__Sordariomycetes	OTU654	8	2.86e-05	0.1111
d__Eukaryota	k__Fungi	p__Mortierellomycota	c__Mortierellomycetes	o__Mortierellales	f__Mortierellaceae	g__Mortierella	s__Mortierella_alpina	OTU748	18	6.43e-05	0.2222
d__Eukaryota	k__Fungi	p__Basidiomycota	c__Agaricomycetes	o__Agaricales	f__Lycoperdaceae	g__Lycoperdon	s__Lycoperdon_curtisii	OTU598	61	0.000217795	0.2222
d__Eukaryota	k__Fungi	p__Ascomycota	c__Sordariomycetes	o__Hypocreales	f__Nectriaceae	g__Fusarium	s__unclassified_g__Fusarium	OTU1003	4	1.43e-05	0.1111
d__Eukaryota	k__Fungi	p__Basidiomycota	c__Tremellomycetes	o__Tremellales	f__Rhynchogastremataceae	g__Papiliotrema	s__Papiliotrema_flavescens	OTU1482	4680	0.0167095	0.7778
d__Eukaryota	k__Fungi	p__Ascomycota	c__Sordariomycetes	o__Xylariales	f__Xylariaceae	g__unclassified_f__Xylariaceae	s__unclassified_f__Xylariaceae	OTU565	3	1.07e-05	0.1111
d__Eukaryota	k__Fungi	p__Ascomycota	c__Dothideomycetes	o__Pleosporales	f__Phaeosphaeriaceae	g__Phaeosphaeria	s__Phaeosphaeria_microscopica	OTU635	174	0.000621251	0.3333
d__Eukaryota	k__Fungi	p__Ascomycota	c__Sordariomycetes	o__Xylariales	f__Xylariaceae	g__unclassified_f__Xylariaceae	s__unclassified_f__Xylariaceae	OTU568	42	0.000149957	0.1111
d__Eukaryota	k__Fungi	p__Ascomycota	c__Sordariomycetes	o__Xylariales	f__Xylariaceae	g__unclassified_f__Xylariaceae	s__unclassified_f__Xylariaceae	OTU738	1	3.57e-06	0.1111
d__Eukaryota	k__Fungi	p__Basidiomycota	c__Malasseziomycetes	o__Malasseziales	f__unclassified_o__Malasseziales	g__unclassified_o__Malasseziales	s__Malasseziales_sp	OTU701	3	1.07e-05	0.1111
d__Eukaryota	k__Fungi	p__unclassified_k__Fungi	c__unclassified_k__Fungi	o__unclassified_k__Fungi	f__unclassified_k__Fungi	g__unclassified_k__Fungi	s__unclassified_k__Fungi	OTU38	3	1.07e-05	0.1111
d__Eukaryota	k__Fungi	p__unclassified_k__Fungi	c__unclassified_k__Fungi	o__unclassified_k__Fungi	f__unclassified_k__Fungi	g__unclassified_k__Fungi	s__unclassified_k__Fungi	OTU35	1	3.57e-06	0.1111
d__Eukaryota	k__Fungi	p__unclassified_k__Fungi	c__unclassified_k__Fungi	o__unclassified_k__Fungi	f__unclassified_k__Fungi	g__unclassified_k__Fungi	s__unclassified_k__Fungi	OTU34	7	2.5e-05	0.2222
d__Eukaryota	k__Fungi	p__unclassified_k__Fungi	c__unclassified_k__Fungi	o__unclassified_k__Fungi	f__unclassified_k__Fungi	g__unclassified_k__Fungi	s__unclassified_k__Fungi	OTU31	1	3.57e-06	0.1111
d__Eukaryota	k__Fungi	p__unclassified_k__Fungi	c__unclassified_k__Fungi	o__unclassified_k__Fungi	f__unclassified_k__Fungi	g__unclassified_k__Fungi	s__unclassified_k__Fungi	OTU30	19	6.78e-05	0.4444
d__Eukaryota	k__Fungi	p__Glomeromycota	c__Glomeromycetes	o__Glomerales	f__Glomeraceae	g__Rhizophagus	s__Rhizophagus_fasciculatus	OTU713	7	2.5e-05	0.1111
d__Eukaryota	k__Fungi	p__Basidiomycota	c__Agaricomycetes	o__Agaricales	f__Entolomataceae	g__Clitopilus	s__Clitopilus_sp	OTU606	24	8.57e-05	0.1111
d__Eukaryota	k__Fungi	p__Ascomycota	c__Sordariomycetes	o__Myrmecridiales	f__Myrmecridiaceae	g__Myrmecridium	s__unclassified_g__Myrmecridium	OTU752	20	7.14e-05	0.1111
d__Eukaryota	k__Fungi	p__Ascomycota	c__Sordariomycetes	o__Myrmecridiales	f__Myrmecridiaceae	g__Myrmecridium	s__Myrmecridium_sp	OTU569	14	5e-05	0.1111
d__Eukaryota	k__Fungi	p__Ascomycota	c__Sordariomycetes	o__Glomerellales	f__Plectosphaerellaceae	g__Plectosphaerella	s__unclassified_g__Plectosphaerella	OTU1491	11191	0.0399564	0.8889
d__Eukaryota	k__Fungi	p__Ascomycota	c__Sordariomycetes	o__Xylariales	f__unclassified_o__Xylariales	g__unclassified_o__Xylariales	s__unclassified_o__Xylariales	OTU581	5	1.79e-05	0.1111
d__Eukaryota	k__Fungi	p__unclassified_k__Fungi	c__unclassified_k__Fungi	o__unclassified_k__Fungi	f__unclassified_k__Fungi	g__unclassified_k__Fungi	s__unclassified_k__Fungi	OTU729	6	2.14e-05	0.1111
d__Eukaryota	k__Fungi	p__Ascomycota	c__Sordariomycetes	o__unclassified_c__Sordariomycetes	f__unclassified_c__Sordariomycetes	g__unclassified_c__Sordariomycetes	s__unclassified_c__Sordariomycetes	OTU648	39	0.000139246	0.1111
d__Eukaryota	k__Fungi	p__Ascomycota	c__Sordariomycetes	o__unclassified_c__Sordariomycetes	f__unclassified_c__Sordariomycetes	g__unclassified_c__Sordariomycetes	s__unclassified_c__Sordariomycetes	OTU641	31	0.000110683	0.1111
d__Eukaryota	k__Fungi	p__unclassified_k__Fungi	c__unclassified_k__Fungi	o__unclassified_k__Fungi	f__unclassified_k__Fungi	g__unclassified_k__Fungi	s__unclassified_k__Fungi	OTU22	1	3.57e-06	0.1111
d__Eukaryota	k__Fungi	p__unclassified_k__Fungi	c__unclassified_k__Fungi	o__unclassified_k__Fungi	f__unclassified_k__Fungi	g__unclassified_k__Fungi	s__unclassified_k__Fungi	OTU24	245	0.00087475	0.7778
d__Eukaryota	k__Fungi	p__unclassified_k__Fungi	c__unclassified_k__Fungi	o__unclassified_k__Fungi	f__unclassified_k__Fungi	g__unclassified_k__Fungi	s__unclassified_k__Fungi	OTU29	3	1.07e-05	0.1111
d__Eukaryota	k__Fungi	p__Ascomycota	c__Leotiomycetes	o__Helotiales	f__Chaetomellaceae	g__Pilidium	s__Pilidium_concavum	OTU725	2	7.14e-06	0.1111
d__Eukaryota	k__Fungi	p__Ascomycota	c__Dothideomycetes	o__Pleosporales	f__Didymosphaeriaceae	g__Letendraea	s__Letendraea_helminthicola	OTU614	238	0.000849757	0.4444
d__Eukaryota	k__Fungi	p__Ascomycota	c__Eurotiomycetes	o__Chaetothyriales	f__Herpotrichiellaceae	g__Exophiala	s__Exophiala_equina	OTU1543	1	3.57e-06	0.1111
d__Eukaryota	k__Fungi	p__Basidiomycota	c__Atractiellomycetes	o__Atractiellales	f__unclassified_o__Atractiellales	g__unclassified_o__Atractiellales	s__Atractiellales_sp	OTU764	8525	0.0304377	0.4444
d__Eukaryota	k__Fungi	p__Basidiomycota	c__Pucciniomycetes	o__Septobasidiales	f__Septobasidiaceae	g__unclassified_f__Septobasidiaceae	s__unclassified_f__Septobasidiaceae	OTU771	11	3.93e-05	0.1111
d__Eukaryota	k__Fungi	p__Ascomycota	c__Sordariomycetes	o__Glomerellales	f__Plectosphaerellaceae	g__Lectera	s__Lectera_sp	OTU743	52	0.000185661	0.1111
d__Eukaryota	k__Fungi	p__Ascomycota	c__Eurotiomycetes	o__Eurotiales	f__Aspergillaceae	g__Aspergillus	s__Aspergillus_penicillioides	OTU1345	1	3.57e-06	0.1111
d__Eukaryota	k__Fungi	p__Ascomycota	c__Dothideomycetes	o__Pleosporales	f__Didymosphaeriaceae	g__unclassified_f__Didymosphaeriaceae	s__unclassified_f__Didymosphaeriaceae	OTU768	6	2.14e-05	0.1111
d__Eukaryota	k__Fungi	p__Basidiomycota	c__Tremellomycetes	o__Trichosporonales	f__Trichosporonaceae	g__Cutaneotrichosporon	s__Cutaneotrichosporon_cutaneum	OTU617	64	0.000228506	0.3333
d__Eukaryota	k__Fungi	p__Basidiomycota	c__Tremellomycetes	o__Trichosporonales	f__Trichosporonaceae	g__Trichosporon	s__Trichosporon_coremiiforme	OTU1519	357	0.00127464	0.5556
d__Eukaryota	k__Fungi	p__unclassified_k__Fungi	c__unclassified_k__Fungi	o__unclassified_k__Fungi	f__unclassified_k__Fungi	g__unclassified_k__Fungi	s__unclassified_k__Fungi	OTU541	3	1.07e-05	0.1111
d__Eukaryota	k__Fungi	p__Ascomycota	c__Dothideomycetes	o__Botryosphaeriales	f__Aplosporellaceae	g__Aplosporella	s__unclassified_g__Aplosporella	OTU720	4	1.43e-05	0.1111
d__Eukaryota	k__Fungi	p__Basidiomycota	c__Tremellomycetes	o__Tremellales	f__Bulleribasidiaceae	g__Vishniacozyma	s__unclassified_g__Vishniacozyma	OTU2041	22	7.85e-05	0.2222
d__Eukaryota	k__Fungi	p__Ascomycota	c__Sordariomycetes	o__Glomerellales	f__Glomerellaceae	g__Colletotrichum	s__Colletotrichum_truncatum	OTU1488	42499	0.151739	0.8889
d__Eukaryota	k__Fungi	p__Ascomycota	c__unclassified_p__Ascomycota	o__unclassified_p__Ascomycota	f__unclassified_p__Ascomycota	g__unclassified_p__Ascomycota	s__unclassified_p__Ascomycota	OTU591	65	0.000232077	0.1111
d__Eukaryota	k__Fungi	p__Ascomycota	c__Saccharomycetes	o__Saccharomycetales	f__Saccharomycetales_fam_Incertae_sedis	g__Candida	s__Candida_subhashii	OTU666	103	0.000367752	0.1111
d__Eukaryota	k__Fungi	p__Ascomycota	c__unclassified_p__Ascomycota	o__unclassified_p__Ascomycota	f__unclassified_p__Ascomycota	g__unclassified_p__Ascomycota	s__unclassified_p__Ascomycota	OTU756	55	0.000196372	0.1111
d__Eukaryota	k__Fungi	p__Ascomycota	c__Sordariomycetes	o__Glomerellales	f__Glomerellaceae	g__Colletotrichum	s__Colletotrichum_boninense	OTU818	1	3.57e-06	0.1111
d__Eukaryota	k__Fungi	p__Ascomycota	c__Sordariomycetes	o__Xylariales	f__Sporocadaceae	g__Neopestalotiopsis	s__Neopestalotiopsis_protearum	OTU653	1165	0.00415953	0.6667
d__Eukaryota	k__Fungi	p__Ascomycota	c__Sordariomycetes	o__Hypocreales	f__Hypocreales_fam_Incertae_sedis	g__Acremonium	s__Acremonium_sclerotigenum	OTU761	180	0.000642674	0.3333
d__Eukaryota	k__Fungi	p__Ascomycota	c__Sordariomycetes	o__Trichosphaeriales	f__Trichosphaeriaceae	g__Nigrospora	s__Nigrospora_oryzae	OTU1078	53	0.000189232	0.2222
d__Eukaryota	k__Fungi	p__Ascomycota	c__Sordariomycetes	o__Glomerellales	f__Glomerellaceae	g__Colletotrichum	s__Colletotrichum_sydowii	OTU760	21	7.5e-05	0.2222
d__Eukaryota	k__Fungi	p__Ascomycota	c__Sordariomycetes	o__Glomerellales	f__Glomerellaceae	g__Colletotrichum	s__Colletotrichum_guajavae	OTU630	49	0.00017495	0.2222
d__Eukaryota	k__Fungi	p__Ascomycota	c__Sordariomycetes	o__Glomerellales	f__Glomerellaceae	g__Colletotrichum	s__unclassified_g__Colletotrichum	OTU619	58	0.000207084	0.3333
d__Eukaryota	k__Fungi	p__Ascomycota	c__Dothideomycetes	o__Pleosporales	f__Didymellaceae	g__Leptosphaerulina	s__unclassified_g__Leptosphaerulina	OTU153	1	3.57e-06	0.1111
d__Eukaryota	k__Fungi	p__Ascomycota	c__Dothideomycetes	o__Pleosporales	f__Didymellaceae	g__unclassified_f__Didymellaceae	s__unclassified_f__Didymellaceae	OTU504	74	0.00026421	0.2222
d__Eukaryota	k__Fungi	p__Basidiomycota	c__Agaricomycetes	o__Agaricales	f__Agaricaceae	g__Agaricus	s__Agaricus_pallidobrunneus	OTU2099	28	0.0001	0.1111
d__Eukaryota	k__Fungi	p__Ascomycota	c__Sordariomycetes	o__unclassified_c__Sordariomycetes	f__unclassified_c__Sordariomycetes	g__unclassified_c__Sordariomycetes	s__unclassified_c__Sordariomycetes	OTU593	6	2.14e-05	0.1111
d__Eukaryota	k__Fungi	p__Ascomycota	c__Eurotiomycetes	o__Chaetothyriales	f__Herpotrichiellaceae	g__Cladophialophora	s__Cladophialophora_sp	OTU869	5	1.79e-05	0.2222
d__Eukaryota	k__Fungi	p__unclassified_k__Fungi	c__unclassified_k__Fungi	o__unclassified_k__Fungi	f__unclassified_k__Fungi	g__unclassified_k__Fungi	s__unclassified_k__Fungi	OTU553	4	1.43e-05	0.1111
d__Eukaryota	k__Fungi	p__unclassified_k__Fungi	c__unclassified_k__Fungi	o__unclassified_k__Fungi	f__unclassified_k__Fungi	g__unclassified_k__Fungi	s__unclassified_k__Fungi	OTU552	13	4.64e-05	0.1111
d__Eukaryota	k__Fungi	p__Basidiomycota	c__Agaricomycetes	o__Agaricales	f__Bolbitiaceae	g__unclassified_f__Bolbitiaceae	s__unclassified_f__Bolbitiaceae	OTU754	21	7.5e-05	0.1111
d__Eukaryota	k__Fungi	p__Ascomycota	c__Sordariomycetes	o__Glomerellales	f__Glomerellaceae	g__Colletotrichum	s__unclassified_g__Colletotrichum	OTU1134	1	3.57e-06	0.1111
d__Eukaryota	k__Fungi	p__Ascomycota	c__Sordariomycetes	o__Togniniales	f__Togniniaceae	g__Phaeoacremonium	s__Phaeoacremonium_scolyti	OTU745	98	0.0003499	0.3333
d__Eukaryota	k__Fungi	p__Basidiomycota	c__Agaricomycetes	o__Agaricales	f__unclassified_o__Agaricales	g__unclassified_o__Agaricales	s__unclassified_o__Agaricales	OTU723	1	3.57e-06	0.1111
d__Eukaryota	k__Fungi	p__Ascomycota	c__Sordariomycetes	o__Diaporthales	f__Diaporthaceae	g__Diaporthe	s__Diaporthe_tectonae	OTU631	308	0.00109969	0.5556
d__Eukaryota	k__Fungi	p__Basidiomycota	c__Agaricomycetes	o__Agaricales	f__Psathyrellaceae	g__Coprinellus	s__Coprinellus_disseminatus	OTU474	20	7.14e-05	0.1111
d__Eukaryota	k__Fungi	p__Ascomycota	c__Dothideomycetes	o__Pleosporales	f__unclassified_o__Pleosporales	g__unclassified_o__Pleosporales	s__unclassified_o__Pleosporales	OTU1942	3	1.07e-05	0.2222
d__Eukaryota	k__Fungi	p__Ascomycota	c__Sordariomycetes	o__Branch06	f__unclassified_o__Branch06	g__unclassified_o__Branch06	s__Branch06_sp	OTU714	30	0.000107112	0.1111
d__Eukaryota	k__Fungi	p__unclassified_k__Fungi	c__unclassified_k__Fungi	o__unclassified_k__Fungi	f__unclassified_k__Fungi	g__unclassified_k__Fungi	s__unclassified_k__Fungi	OTU693	2	7.14e-06	0.1111
d__Eukaryota	k__Fungi	p__Ascomycota	c__Dothideomycetes	o__Pleosporales	f__Phaeosphaeriaceae	g__unclassified_f__Phaeosphaeriaceae	s__unclassified_f__Phaeosphaeriaceae	OTU647	5	1.79e-05	0.1111
d__Eukaryota	k__Fungi	p__Ascomycota	c__Dothideomycetes	o__Pleosporales	f__Didymellaceae	g__unclassified_f__Didymellaceae	s__unclassified_f__Didymellaceae	OTU1498	2303	0.00822265	0.6667
d__Eukaryota	k__Fungi	p__unclassified_k__Fungi	c__unclassified_k__Fungi	o__unclassified_k__Fungi	f__unclassified_k__Fungi	g__unclassified_k__Fungi	s__unclassified_k__Fungi	OTU709	19	6.78e-05	0.2222
d__Eukaryota	k__Fungi	p__unclassified_k__Fungi	c__unclassified_k__Fungi	o__unclassified_k__Fungi	f__unclassified_k__Fungi	g__unclassified_k__Fungi	s__unclassified_k__Fungi	OTU704	45	0.000160668	0.2222
d__Eukaryota	k__Fungi	p__unclassified_k__Fungi	c__unclassified_k__Fungi	o__unclassified_k__Fungi	f__unclassified_k__Fungi	g__unclassified_k__Fungi	s__unclassified_k__Fungi	OTU705	74	0.00026421	0.1111
d__Eukaryota	k__Fungi	p__unclassified_k__Fungi	c__unclassified_k__Fungi	o__unclassified_k__Fungi	f__unclassified_k__Fungi	g__unclassified_k__Fungi	s__unclassified_k__Fungi	OTU706	8	2.86e-05	0.1111
d__Eukaryota	k__Fungi	p__Basidiomycota	c__Agaricomycetes	o__Agaricales	f__Psathyrellaceae	g__Coprinellus	s__Coprinellus_disseminatus	OTU2036	38	0.000135676	0.3333
d__Eukaryota	k__Fungi	p__unclassified_k__Fungi	c__unclassified_k__Fungi	o__unclassified_k__Fungi	f__unclassified_k__Fungi	g__unclassified_k__Fungi	s__unclassified_k__Fungi	OTU700	20	7.14e-05	0.1111
d__Eukaryota	k__Fungi	p__unclassified_k__Fungi	c__unclassified_k__Fungi	o__unclassified_k__Fungi	f__unclassified_k__Fungi	g__unclassified_k__Fungi	s__unclassified_k__Fungi	OTU703	1	3.57e-06	0.1111
d__Eukaryota	k__Fungi	p__Ascomycota	c__Sordariomycetes	o__Diaporthales	f__Diaporthaceae	g__Diaporthe	s__unclassified_g__Diaporthe	OTU965	2	7.14e-06	0.1111
d__Eukaryota	k__Fungi	p__Ascomycota	c__Dothideomycetes	o__Pleosporales	f__unclassified_o__Pleosporales	g__unclassified_o__Pleosporales	s__unclassified_o__Pleosporales	OTU751	13	4.64e-05	0.1111
d__Eukaryota	k__Fungi	p__Basidiomycota	c__Ustilaginomycetes	o__Ustilaginales	f__Ustilaginaceae	g__Moesziomyces	s__Moesziomyces_sp	OTU1483	28	0.0001	0.3333
d__Eukaryota	k__Fungi	p__Basidiomycota	c__unclassified_p__Basidiomycota	o__unclassified_p__Basidiomycota	f__unclassified_p__Basidiomycota	g__unclassified_p__Basidiomycota	s__unclassified_p__Basidiomycota	OTU578	57	0.000203513	0.1111
d__Eukaryota	k__Fungi	p__Basidiomycota	c__Agaricomycetes	o__Agaricales	f__Strophariaceae	g__Deconica	s__Deconica_sp	OTU655	9	3.21e-05	0.1111
d__Eukaryota	k__Fungi	p__Ascomycota	c__Sordariomycetes	o__Sordariales	f__Lasiosphaeriaceae	g__Cercophora	s__unclassified_g__Cercophora	OTU566	54	0.000192802	0.1111
d__Eukaryota	k__Fungi	p__unclassified_k__Fungi	c__unclassified_k__Fungi	o__unclassified_k__Fungi	f__unclassified_k__Fungi	g__unclassified_k__Fungi	s__unclassified_k__Fungi	OTU639	13	4.64e-05	0.1111
d__Eukaryota	k__Fungi	p__unclassified_k__Fungi	c__unclassified_k__Fungi	o__unclassified_k__Fungi	f__unclassified_k__Fungi	g__unclassified_k__Fungi	s__unclassified_k__Fungi	OTU632	26491	0.0945837	1
d__Eukaryota	k__Fungi	p__unclassified_k__Fungi	c__unclassified_k__Fungi	o__unclassified_k__Fungi	f__unclassified_k__Fungi	g__unclassified_k__Fungi	s__unclassified_k__Fungi	OTU634	468	0.00167095	0.5556
d__Eukaryota	k__Fungi	p__unclassified_k__Fungi	c__unclassified_k__Fungi	o__unclassified_k__Fungi	f__unclassified_k__Fungi	g__unclassified_k__Fungi	s__unclassified_k__Fungi	OTU637	10	3.57e-05	0.1111
d__Eukaryota	k__Fungi	p__Basidiomycota	c__Cystobasidiomycetes	o__Erythrobasidiales	f__Erythrobasidiaceae	g__Erythrobasidium	s__unclassified_g__Erythrobasidium	OTU381	27	9.64e-05	0.2222
d__Eukaryota	k__Fungi	p__Basidiomycota	c__Cystobasidiomycetes	o__Erythrobasidiales	f__Erythrobasidiaceae	g__Erythrobasidium	s__Erythrobasidium_sp	OTU1697	12	4.28e-05	0.2222
d__Eukaryota	k__Fungi	p__unclassified_k__Fungi	c__unclassified_k__Fungi	o__unclassified_k__Fungi	f__unclassified_k__Fungi	g__unclassified_k__Fungi	s__unclassified_k__Fungi	OTU1	5	1.79e-05	0.2222
d__Eukaryota	k__Fungi	p__Ascomycota	c__Sordariomycetes	o__Hypocreales	f__Nectriaceae	g__Gibberella	s__Gibberella_intricans	OTU1515	41	0.000146387	0.3333
d__Eukaryota	k__Fungi	p__Ascomycota	c__Sordariomycetes	o__Hypocreales	f__Bionectriaceae	g__Hydropisphaera	s__Hydropisphaera_fungicola	OTU2074	108	0.000385604	0.1111
d__Eukaryota	k__Fungi	p__Basidiomycota	c__Agaricomycetes	o__Agaricales	f__Agaricaceae	g__Hymenagaricus	s__Hymenagaricus_sp	OTU731	4	1.43e-05	0.1111
d__Eukaryota	k__Fungi	p__unclassified_k__Fungi	c__unclassified_k__Fungi	o__unclassified_k__Fungi	f__unclassified_k__Fungi	g__unclassified_k__Fungi	s__unclassified_k__Fungi	OTU561	1	3.57e-06	0.1111
d__Eukaryota	k__Fungi	p__Ascomycota	c__unclassified_p__Ascomycota	o__unclassified_p__Ascomycota	f__unclassified_p__Ascomycota	g__unclassified_p__Ascomycota	s__unclassified_p__Ascomycota	OTU550	7	2.5e-05	0.1111
d__Eukaryota	k__Fungi	p__Basidiomycota	c__Tremellomycetes	o__Tremellales	f__unclassified_o__Tremellales	g__unclassified_o__Tremellales	s__unclassified_o__Tremellales	OTU749	181	0.000646244	0.2222
d__Eukaryota	k__Fungi	p__Ascomycota	c__Dothideomycetes	o__Capnodiales	f__Cladosporiaceae	g__Cladosporium	s__Cladosporium_halotolerans	OTU896	25	8.93e-05	0.1111
d__Eukaryota	k__Fungi	p__Ascomycota	c__Sordariomycetes	o__Hypocreales	f__Clavicipitaceae	g__Metarhizium	s__Metarhizium_marquandii	OTU721	2	7.14e-06	0.1111
d__Eukaryota	k__Fungi	p__Ascomycota	c__Eurotiomycetes	o__Eurotiales	f__Trichocomaceae	g__Thermomyces	s__Thermomyces_lanuginosus	OTU1905	171	0.00061054	0.1111
d__Eukaryota	k__Fungi	p__Ascomycota	c__Pezizomycetes	o__Pezizales	f__Sarcosomataceae	g__unclassified_f__Sarcosomataceae	s__Sarcosomataceae_sp	OTU567	10	3.57e-05	0.1111
d__Eukaryota	k__Fungi	p__unclassified_k__Fungi	c__unclassified_k__Fungi	o__unclassified_k__Fungi	f__unclassified_k__Fungi	g__unclassified_k__Fungi	s__unclassified_k__Fungi	OTU627	7	2.5e-05	0.1111
d__Eukaryota	k__Fungi	p__unclassified_k__Fungi	c__unclassified_k__Fungi	o__unclassified_k__Fungi	f__unclassified_k__Fungi	g__unclassified_k__Fungi	s__unclassified_k__Fungi	OTU625	4	1.43e-05	0.1111
d__Eukaryota	k__Fungi	p__Ascomycota	c__Dothideomycetes	o__Pleosporales	f__Phaeosphaeriaceae	g__Paraphoma	s__Paraphoma_chrysanthemicola	OTU116	8	2.86e-05	0.1111
d__Eukaryota	k__Fungi	p__Ascomycota	c__Sordariomycetes	o__Hypocreales	f__Nectriaceae	g__Fusicolla	s__Fusicolla_acetilerea	OTU254	2	7.14e-06	0.1111
d__Eukaryota	k__Fungi	p__Basidiomycota	c__Tremellomycetes	o__Tremellales	f__Bulleribasidiaceae	g__Vishniacozyma	s__unclassified_g__Vishniacozyma	OTU722	12	4.28e-05	0.1111
d__Eukaryota	k__Fungi	p__unclassified_k__Fungi	c__unclassified_k__Fungi	o__unclassified_k__Fungi	f__unclassified_k__Fungi	g__unclassified_k__Fungi	s__unclassified_k__Fungi	OTU91	64	0.000228506	0.7778
d__Eukaryota	k__Fungi	p__unclassified_k__Fungi	c__unclassified_k__Fungi	o__unclassified_k__Fungi	f__unclassified_k__Fungi	g__unclassified_k__Fungi	s__unclassified_k__Fungi	OTU710	34	0.000121394	0.2222
d__Eukaryota	k__Fungi	p__unclassified_k__Fungi	c__unclassified_k__Fungi	o__unclassified_k__Fungi	f__unclassified_k__Fungi	g__unclassified_k__Fungi	s__unclassified_k__Fungi	OTU717	86	0.000307055	0.3333
d__Eukaryota	k__Fungi	p__unclassified_k__Fungi	c__unclassified_k__Fungi	o__unclassified_k__Fungi	f__unclassified_k__Fungi	g__unclassified_k__Fungi	s__unclassified_k__Fungi	OTU715	76	0.000271351	0.3333
d__Eukaryota	k__Fungi	p__Ascomycota	c__Sordariomycetes	o__Hypocreales	f__Nectriaceae	g__Thelonectria	s__Thelonectria_rubrococca	OTU603	207	0.000739075	0.5556
d__Eukaryota	k__Fungi	p__unclassified_k__Fungi	c__unclassified_k__Fungi	o__unclassified_k__Fungi	f__unclassified_k__Fungi	g__unclassified_k__Fungi	s__unclassified_k__Fungi	OTU718	39	0.000139246	0.1111
d__Eukaryota	k__Fungi	p__Ascomycota	c__Dothideomycetes	o__Capnodiales	f__Mycosphaerellaceae	g__Pseudocercospora	s__unclassified_g__Pseudocercospora	OTU1508	19	6.78e-05	0.1111
d__Eukaryota	k__Fungi	p__Ascomycota	c__Sordariomycetes	o__Sordariales	f__Lasiosphaeriaceae	g__Schizothecium	s__unclassified_g__Schizothecium	OTU702	51	0.000182091	0.1111
d__Eukaryota	k__Fungi	p__Ascomycota	c__Saccharomycetes	o__Saccharomycetales	f__Trichomonascaceae	g__Blastobotrys	s__Blastobotrys_malaysiensis	OTU712	440	0.00157098	0.2222
d__Eukaryota	k__Fungi	p__Ascomycota	c__Eurotiomycetes	o__Chaetothyriales	f__Herpotrichiellaceae	g__Exophiala	s__Exophiala_alcalophila	OTU571	2	7.14e-06	0.1111
d__Eukaryota	k__Fungi	p__Ascomycota	c__Dothideomycetes	o__Pleosporales	f__Didymellaceae	g__Phoma	s__Phoma_multirostrata	OTU1486	34913	0.124654	0.7778
d__Eukaryota	k__Fungi	p__Ascomycota	c__Dothideomycetes	o__Pleosporales	f__Morosphaeriaceae	g__Acrocalymma	s__Acrocalymma_walkeri	OTU2054	4	1.43e-05	0.1111
d__Eukaryota	k__Fungi	p__Ascomycota	c__Dothideomycetes	o__Pleosporales	f__Sporormiaceae	g__unclassified_f__Sporormiaceae	s__unclassified_f__Sporormiaceae	OTU540	2	7.14e-06	0.1111
d__Eukaryota	k__Fungi	p__Ascomycota	c__Dothideomycetes	o__Pleosporales	f__Didymosphaeriaceae	g__Letendraea	s__Letendraea_helminthicola	OTU767	21	7.5e-05	0.1111
d__Eukaryota	k__Fungi	p__Ascomycota	c__Dothideomycetes	o__Pleosporales	f__Morosphaeriaceae	g__Acrocalymma	s__Acrocalymma_medicaginis	OTU1968	7	2.5e-05	0.1111
d__Eukaryota	k__Fungi	p__Ascomycota	c__Sordariomycetes	o__Xylariales	f__Amphisphaeriaceae	g__unclassified_f__Amphisphaeriaceae	s__unclassified_f__Amphisphaeriaceae	OTU613	15	5.36e-05	0.1111
d__Eukaryota	k__Fungi	p__Ascomycota	c__Dothideomycetes	o__Pleosporales	f__Corynesporascaceae	g__Corynespora	s__Corynespora_cassiicola	OTU2134	5	1.79e-05	0.1111
d__Eukaryota	k__Fungi	p__Ascomycota	c__Sordariomycetes	o__Diaporthales	f__Diaporthaceae	g__Diaporthe	s__unclassified_g__Diaporthe	OTU2005	1	3.57e-06	0.1111
d__Eukaryota	k__Fungi	p__Basidiomycota	c__Tremellomycetes	o__Trichosporonales	f__Trichosporonaceae	g__Apiotrichum	s__Apiotrichum_montevideense	OTU1529	8422	0.03007	1
d__Eukaryota	k__Fungi	p__Ascomycota	c__Sordariomycetes	o__unclassified_c__Sordariomycetes	f__unclassified_c__Sordariomycetes	g__unclassified_c__Sordariomycetes	s__unclassified_c__Sordariomycetes	OTU544	56	0.000199943	0.3333
d__Eukaryota	k__Fungi	p__Ascomycota	c__Sordariomycetes	o__unclassified_c__Sordariomycetes	f__unclassified_c__Sordariomycetes	g__unclassified_c__Sordariomycetes	s__unclassified_c__Sordariomycetes	OTU546	14	5e-05	0.1111
d__Eukaryota	k__Fungi	p__Ascomycota	c__Sordariomycetes	o__unclassified_c__Sordariomycetes	f__unclassified_c__Sordariomycetes	g__unclassified_c__Sordariomycetes	s__unclassified_c__Sordariomycetes	OTU542	6	2.14e-05	0.1111
d__Eukaryota	k__Fungi	p__Ascomycota	c__Sordariomycetes	o__unclassified_c__Sordariomycetes	f__unclassified_c__Sordariomycetes	g__unclassified_c__Sordariomycetes	s__unclassified_c__Sordariomycetes	OTU549	4	1.43e-05	0.1111
d__Eukaryota	k__Fungi	p__Ascomycota	c__Sordariomycetes	o__unclassified_c__Sordariomycetes	f__unclassified_c__Sordariomycetes	g__unclassified_c__Sordariomycetes	s__unclassified_c__Sordariomycetes	OTU548	4	1.43e-05	0.1111
d__Eukaryota	k__Fungi	p__unclassified_k__Fungi	c__unclassified_k__Fungi	o__unclassified_k__Fungi	f__unclassified_k__Fungi	g__unclassified_k__Fungi	s__unclassified_k__Fungi	OTU575	15	5.36e-05	0.1111
d__Eukaryota	k__Fungi	p__Ascomycota	c__Sordariomycetes	o__Xylariales	f__Xylariaceae	g__Digitodochium	s__Digitodochium_rhodoleucum	OTU1636	6	2.14e-05	0.1111
d__Eukaryota	k__Fungi	p__Basidiomycota	c__Agaricomycetes	o__Agaricales	f__Psathyrellaceae	g__Psathyrella	s__unclassified_g__Psathyrella	OTU626	44	0.000157098	0.1111
d__Eukaryota	k__Fungi	p__Ascomycota	c__unclassified_p__Ascomycota	o__unclassified_p__Ascomycota	f__unclassified_p__Ascomycota	g__unclassified_p__Ascomycota	s__unclassified_p__Ascomycota	OTU697	11	3.93e-05	0.1111
d__Eukaryota	k__Fungi	p__Ascomycota	c__Sordariomycetes	o__Diaporthales	f__Diaporthaceae	g__Diaporthe	s__unclassified_g__Diaporthe	OTU545	47	0.000167809	0.4444
d__Eukaryota	k__Fungi	p__Basidiomycota	c__Agaricomycetes	o__unclassified_c__Agaricomycetes	f__unclassified_c__Agaricomycetes	g__unclassified_c__Agaricomycetes	s__unclassified_c__Agaricomycetes	OTU766	25	8.93e-05	0.1111
d__Eukaryota	k__Fungi	p__Ascomycota	c__Dothideomycetes	o__Pleosporales	f__Periconiaceae	g__Periconia	s__Periconia_byssoides	OTU1179	220	0.00078549	0.1111
d__Eukaryota	k__Fungi	p__unclassified_k__Fungi	c__unclassified_k__Fungi	o__unclassified_k__Fungi	f__unclassified_k__Fungi	g__unclassified_k__Fungi	s__unclassified_k__Fungi	OTU181	11	3.93e-05	0.3333
d__Eukaryota	k__Fungi	p__Ascomycota	c__Dothideomycetes	o__Pleosporales	f__Teichosporaceae	g__Teichospora	s__Teichospora_thailandica	OTU2101	9	3.21e-05	0.1111
d__Eukaryota	k__Fungi	p__Ascomycota	c__Leotiomycetes	o__Helotiales	f__unclassified_o__Helotiales	g__unclassified_o__Helotiales	s__unclassified_o__Helotiales	OTU585	9	3.21e-05	0.1111
