# Supplementary material for: Community Structure and Diversity of Endophytic Fungi in Cultivated Polygala crotalarioides at Two Different Growth Stages Based on Culture-Independent and Culture-Based Methods
Source: J Fungi (Basel). 2024 Mar 4;10(3):195. doi: 10.3390/jof10030195 (PMC10970964; doi:10.3390/jof10030195)
Supplement: Supplementary file 1 [file jof-10-00195-s001.zip › Table S3 OTUs of endophytic fungi from 2-year P. crotalarioides.xlsx]

## Sheet: Table S3 OTUs of endophytic fun
Table S3 OTUs of endophytic fungi from 2-year P. crotalarioides
Domain	Kingdom	Phylum	Class	Order	Family	Genus	Species	OTU	Total	Percent	Prevalence
d__Eukaryota	k__Fungi	p__unclassified_k__Fungi	c__unclassified_k__Fungi	o__unclassified_k__Fungi	f__unclassified_k__Fungi	g__unclassified_k__Fungi	s__unclassified_k__Fungi	OTU1381	4	1.42816e-05	0.111111
d__Eukaryota	k__Fungi	p__Ascomycota	c__unclassified_p__Ascomycota	o__unclassified_p__Ascomycota	f__unclassified_p__Ascomycota	g__unclassified_p__Ascomycota	s__unclassified_p__Ascomycota	OTU1143	2	7.14082e-06	0.111111
d__Eukaryota	k__Fungi	p__Ascomycota	c__Eurotiomycetes	o__Chaetothyriales	f__Herpotrichiellaceae	g__Cladophialophora	s__Cladophialophora_sp	OTU1168	93	0.000332048	0.222222
d__Eukaryota	k__Fungi	p__Ascomycota	c__Lecanoromycetes	o__Lecanorales	f__Pilocarpaceae	g__Fellhanera	s__Fellhanera_bouteillei	OTU1041	7	2.49929e-05	0.333333
d__Eukaryota	k__Fungi	p__Ascomycota	c__Lecanoromycetes	o__Ostropales	f__Stictidaceae	g__unclassified_f__Stictidaceae	s__Stictidaceae_sp	OTU1256	4	1.42816e-05	0.333333
d__Eukaryota	k__Fungi	p__Ascomycota	c__Dothideomycetes	o__Pleosporales	f__unclassified_o__Pleosporales	g__unclassified_o__Pleosporales	s__unclassified_o__Pleosporales	OTU1151	1	3.57041e-06	0.111111
d__Eukaryota	k__Fungi	p__Ascomycota	c__Dothideomycetes	o__Pleosporales	f__Didymosphaeriaceae	g__Montagnula	s__Montagnula_sp	OTU1880	36	0.000128535	0.111111
d__Eukaryota	k__Fungi	p__Ascomycota	c__Dothideomycetes	o__Capnodiales	f__Teratosphaeriaceae	g__Catenulostroma	s__Catenulostroma_corymbiae	OTU823	6	2.14225e-05	0.111111
d__Eukaryota	k__Fungi	p__Ascomycota	c__Sordariomycetes	o__Diaporthales	f__Diaporthaceae	g__Diaporthe	s__unclassified_g__Diaporthe	OTU1479	11	3.92745e-05	0.222222
d__Eukaryota	k__Fungi	p__Ascomycota	c__unclassified_p__Ascomycota	o__unclassified_p__Ascomycota	f__unclassified_p__Ascomycota	g__unclassified_p__Ascomycota	s__unclassified_p__Ascomycota	OTU1359	4	1.42816e-05	0.222222
d__Eukaryota	k__Fungi	p__Ascomycota	c__Dothideomycetes	o__Pleosporales	f__Periconiaceae	g__unclassified_f__Periconiaceae	s__unclassified_f__Periconiaceae	OTU1241	4	1.42816e-05	0.111111
d__Eukaryota	k__Fungi	p__Ascomycota	c__Sordariomycetes	o__Hypocreales	f__Nectriaceae	g__Fusarium	s__unclassified_g__Fusarium	OTU1520	24079	0.0859719	1
d__Eukaryota	k__Fungi	p__Ascomycota	c__Sordariomycetes	o__Xylariales	f__Xylariaceae	g__unclassified_f__Xylariaceae	s__unclassified_f__Xylariaceae	OTU1043	2	7.14082e-06	0.111111
d__Eukaryota	k__Fungi	p__Ascomycota	c__Sordariomycetes	o__Diaporthales	f__Diaporthaceae	g__Diaporthe	s__unclassified_g__Diaporthe	OTU1129	102	0.000364182	0.222222
d__Eukaryota	k__Fungi	p__Ascomycota	c__Sordariomycetes	o__Xylariales	f__unclassified_o__Xylariales	g__unclassified_o__Xylariales	s__unclassified_o__Xylariales	OTU1386	3	1.07112e-05	0.111111
d__Eukaryota	k__Fungi	p__Ascomycota	c__Dothideomycetes	o__Capnodiales	f__Cladosporiaceae	g__Cladosporium	s__Cladosporium_sphaerospermum	OTU583	139	0.000496287	0.555556
d__Eukaryota	k__Fungi	p__Ascomycota	c__Eurotiomycetes	o__Chaetothyriales	f__Cyphellophoraceae	g__Cyphellophora	s__unclassified_g__Cyphellophora	OTU1116	7	2.49929e-05	0.111111
d__Eukaryota	k__Fungi	p__Basidiomycota	c__Agaricomycetes	o__Thelephorales	f__Thelephoraceae	g__unclassified_f__Thelephoraceae	s__unclassified_f__Thelephoraceae	OTU1267	6	2.14225e-05	0.111111
d__Eukaryota	k__Fungi	p__Ascomycota	c__Dothideomycetes	o__Venturiales	f__Sympoventuriaceae	g__Neocoleroa	s__Neocoleroa_metrosideri	OTU1449	116	0.000414167	0.222222
d__Eukaryota	k__Fungi	p__unclassified_k__Fungi	c__unclassified_k__Fungi	o__unclassified_k__Fungi	f__unclassified_k__Fungi	g__unclassified_k__Fungi	s__unclassified_k__Fungi	OTU763	1	3.57041e-06	0.111111
d__Eukaryota	k__Fungi	p__Ascomycota	c__Leotiomycetes	o__Helotiales	f__Dermateaceae	g__Trimmatostroma	s__Trimmatostroma_cordae	OTU332	8	2.85633e-05	0.111111
d__Eukaryota	k__Fungi	p__Basidiomycota	c__Agaricomycetes	o__Phallales	f__unclassified_o__Phallales	g__unclassified_o__Phallales	s__Phallales_sp	OTU997	2	7.14082e-06	0.111111
d__Eukaryota	k__Fungi	p__Basidiomycota	c__Agaricomycetes	o__Trechisporales	f__Hydnodontaceae	g__Trechispora	s__unclassified_g__Trechispora	OTU1330	11	3.92745e-05	0.111111
d__Eukaryota	k__Fungi	p__Basidiomycota	c__Agaricomycetes	o__Trechisporales	f__Hydnodontaceae	g__Trechispora	s__unclassified_g__Trechispora	OTU1331	6	2.14225e-05	0.111111
d__Eukaryota	k__Fungi	p__Basidiomycota	c__Tremellomycetes	o__Tremellales	f__Trimorphomycetaceae	g__Saitozyma	s__Saitozyma_paraflava	OTU920	228	0.000814053	0.222222
d__Eukaryota	k__Fungi	p__unclassified_k__Fungi	c__unclassified_k__Fungi	o__unclassified_k__Fungi	f__unclassified_k__Fungi	g__unclassified_k__Fungi	s__unclassified_k__Fungi	OTU1166	3	1.07112e-05	0.222222
d__Eukaryota	k__Fungi	p__unclassified_k__Fungi	c__unclassified_k__Fungi	o__unclassified_k__Fungi	f__unclassified_k__Fungi	g__unclassified_k__Fungi	s__unclassified_k__Fungi	OTU1167	15	5.35561e-05	0.111111
d__Eukaryota	k__Fungi	p__Ascomycota	c__Eurotiomycetes	o__Chaetothyriales	f__Chaetothyriaceae	g__unclassified_f__Chaetothyriaceae	s__unclassified_f__Chaetothyriaceae	OTU1269	5	1.7852e-05	0.111111
d__Eukaryota	k__Fungi	p__Ascomycota	c__Eurotiomycetes	o__Chaetothyriales	f__Cyphellophoraceae	g__Cyphellophora	s__Cyphellophora_laciniata	OTU538	15	5.35561e-05	0.111111
d__Eukaryota	k__Fungi	p__Basidiomycota	c__Tremellomycetes	o__Tremellales	f__Bulleribasidiaceae	g__Vishniacozyma	s__unclassified_g__Vishniacozyma	OTU131	55	0.000196372	0.444444
d__Eukaryota	k__Fungi	p__Basidiomycota	c__Microbotryomycetes	o__Sporidiobolales	f__Sporidiobolaceae	g__Rhodosporidiobolus	s__Rhodosporidiobolus_fluvialis	OTU889	7	2.49929e-05	0.111111
d__Eukaryota	k__Fungi	p__Ascomycota	c__Eurotiomycetes	o__Chaetothyriales	f__Cyphellophoraceae	g__Cyphellophora	s__unclassified_g__Cyphellophora	OTU944	9	3.21337e-05	0.111111
d__Eukaryota	k__Fungi	p__Ascomycota	c__Dothideomycetes	o__Pleosporales	f__Biatriosporaceae	g__Biatriospora	s__Biatriospora_sp	OTU1176	6	2.14225e-05	0.111111
d__Eukaryota	k__Fungi	p__Ascomycota	c__Sordariomycetes	o__unclassified_c__Sordariomycetes	f__unclassified_c__Sordariomycetes	g__unclassified_c__Sordariomycetes	s__unclassified_c__Sordariomycetes	OTU959	10	3.57041e-05	0.222222
d__Eukaryota	k__Fungi	p__Ascomycota	c__Eurotiomycetes	o__Chaetothyriales	f__Herpotrichiellaceae	g__Exophiala	s__unclassified_g__Exophiala	OTU274	7	2.49929e-05	0.222222
d__Eukaryota	k__Fungi	p__Ascomycota	c__Eurotiomycetes	o__Eurotiales	f__Trichocomaceae	g__Talaromyces	s__Talaromyces_stollii	OTU891	4428	0.0158098	1
d__Eukaryota	k__Fungi	p__Ascomycota	c__Sordariomycetes	o__Diaporthales	f__Diaporthaceae	g__Diaporthe	s__unclassified_g__Diaporthe	OTU793	1	3.57041e-06	0.111111
d__Eukaryota	k__Fungi	p__Ascomycota	c__Sordariomycetes	o__Diaporthales	f__Diaporthaceae	g__Diaporthe	s__unclassified_g__Diaporthe	OTU820	10	3.57041e-05	0.111111
d__Eukaryota	k__Fungi	p__Basidiomycota	c__Agaricomycetes	o__Polyporales	f__Ganodermataceae	g__Ganoderma	s__Ganoderma_australe	OTU1280	23	8.21194e-05	0.222222
d__Eukaryota	k__Fungi	p__Basidiomycota	c__unclassified_p__Basidiomycota	o__unclassified_p__Basidiomycota	f__unclassified_p__Basidiomycota	g__unclassified_p__Basidiomycota	s__unclassified_p__Basidiomycota	OTU1268	1	3.57041e-06	0.111111
d__Eukaryota	k__Fungi	p__Basidiomycota	c__unclassified_p__Basidiomycota	o__unclassified_p__Basidiomycota	f__unclassified_p__Basidiomycota	g__unclassified_p__Basidiomycota	s__unclassified_p__Basidiomycota	OTU1463	2	7.14082e-06	0.111111
d__Eukaryota	k__Fungi	p__Mortierellomycota	c__Mortierellomycetes	o__Mortierellales	f__Mortierellaceae	g__Mortierella	s__unclassified_g__Mortierella	OTU880	38	0.000135676	0.111111
d__Eukaryota	k__Fungi	p__Ascomycota	c__Dothideomycetes	o__Capnodiales	f__Cladosporiaceae	g__Rachicladosporium	s__unclassified_g__Rachicladosporium	OTU1357	4	1.42816e-05	0.111111
d__Eukaryota	k__Fungi	p__unclassified_k__Fungi	c__unclassified_k__Fungi	o__unclassified_k__Fungi	f__unclassified_k__Fungi	g__unclassified_k__Fungi	s__unclassified_k__Fungi	OTU990	4	1.42816e-05	0.111111
d__Eukaryota	k__Fungi	p__unclassified_k__Fungi	c__unclassified_k__Fungi	o__unclassified_k__Fungi	f__unclassified_k__Fungi	g__unclassified_k__Fungi	s__unclassified_k__Fungi	OTU993	2	7.14082e-06	0.111111
d__Eukaryota	k__Fungi	p__Ascomycota	c__Sordariomycetes	o__Hypocreales	f__Nectriaceae	g__Fusicolla	s__Fusicolla_sp	OTU1341	13	4.64153e-05	0.111111
d__Eukaryota	k__Fungi	p__Ascomycota	c__Eurotiomycetes	o__Chaetothyriales	f__Herpotrichiellaceae	g__Cladophialophora	s__unclassified_g__Cladophialophora	OTU1197	10	3.57041e-05	0.111111
d__Eukaryota	k__Fungi	p__Ascomycota	c__Dothideomycetes	o__Capnodiales	f__Teratosphaeriaceae	g__Devriesia	s__Devriesia_strelitziicola	OTU1279	2	7.14082e-06	0.111111
d__Eukaryota	k__Fungi	p__Ascomycota	c__Eurotiomycetes	o__Chaetothyriales	f__Cyphellophoraceae	g__Cyphellophora	s__Cyphellophora_europaea	OTU983	55	0.000196372	0.555556
d__Eukaryota	k__Fungi	p__Ascomycota	c__Sordariomycetes	o__Hypocreales	f__Ophiocordycipitaceae	g__Ophiocordyceps	s__Ophiocordyceps_sp	OTU1011	5	1.7852e-05	0.222222
d__Eukaryota	k__Fungi	p__Ascomycota	c__Eurotiomycetes	o__Chaetothyriales	f__Herpotrichiellaceae	g__Cladophialophora	s__unclassified_g__Cladophialophora	OTU409	15	5.35561e-05	0.111111
d__Eukaryota	k__Fungi	p__Ascomycota	c__Eurotiomycetes	o__Chaetothyriales	f__Chaetothyriales_fam_Incertae_sedis	g__Strelitziana	s__Strelitziana_eucalypti	OTU956	15	5.35561e-05	0.222222
d__Eukaryota	k__Fungi	p__Ascomycota	c__Sordariomycetes	o__Xylariales	f__Xylariaceae	g__Hypoxylon	s__Hypoxylon_fendleri	OTU1131	9	3.21337e-05	0.333333
d__Eukaryota	k__Fungi	p__Ascomycota	c__unclassified_p__Ascomycota	o__unclassified_p__Ascomycota	f__unclassified_p__Ascomycota	g__unclassified_p__Ascomycota	s__unclassified_p__Ascomycota	OTU1038	3	1.07112e-05	0.111111
d__Eukaryota	k__Fungi	p__Basidiomycota	c__Agaricomycetes	o__Agaricales	f__Lycoperdaceae	g__unclassified_f__Lycoperdaceae	s__unclassified_f__Lycoperdaceae	OTU2033	2	7.14082e-06	0.111111
d__Eukaryota	k__Fungi	p__Basidiomycota	c__Agaricomycetes	o__unclassified_c__Agaricomycetes	f__unclassified_c__Agaricomycetes	g__unclassified_c__Agaricomycetes	s__unclassified_c__Agaricomycetes	OTU1027	1	3.57041e-06	0.111111
d__Eukaryota	k__Fungi	p__Ascomycota	c__Sordariomycetes	o__Xylariales	f__Xylariaceae	g__Xylaria	s__Xylaria_acuminatilongissima	OTU2034	18	6.42674e-05	0.111111
d__Eukaryota	k__Fungi	p__Ascomycota	c__Sordariomycetes	o__Xylariales	f__Xylariaceae	g__Hypoxylon	s__Hypoxylon_monticulosum	OTU1200	13	4.64153e-05	0.222222
d__Eukaryota	k__Fungi	p__Ascomycota	c__Eurotiomycetes	o__Eurotiales	f__Aspergillaceae	g__Penicillium	s__unclassified_g__Penicillium	OTU1122	128	0.000457012	0.333333
d__Eukaryota	k__Fungi	p__Basidiomycota	c__Tremellomycetes	o__Tremellales	f__Bulleribasidiaceae	g__Derxomyces	s__Derxomyces_sp	OTU871	8	2.85633e-05	0.111111
d__Eukaryota	k__Fungi	p__Ascomycota	c__Eurotiomycetes	o__Chaetothyriales	f__Cyphellophoraceae	g__Cyphellophora	s__Cyphellophora_olivacea	OTU1427	18	6.42674e-05	0.111111
d__Eukaryota	k__Fungi	p__unclassified_k__Fungi	c__unclassified_k__Fungi	o__unclassified_k__Fungi	f__unclassified_k__Fungi	g__unclassified_k__Fungi	s__unclassified_k__Fungi	OTU1155	4	1.42816e-05	0.222222
d__Eukaryota	k__Fungi	p__Basidiomycota	c__Agaricomycetes	o__Agaricales	f__Strophariaceae	g__Deconica	s__Deconica_sp	OTU1735	14	4.99857e-05	0.222222
d__Eukaryota	k__Fungi	p__Ascomycota	c__Sordariomycetes	o__Coniochaetales	f__Coniochaetaceae	g__Coniochaeta	s__unclassified_g__Coniochaeta	OTU1265	2	7.14082e-06	0.111111
d__Eukaryota	k__Fungi	p__Ascomycota	c__Lecanoromycetes	o__Lecanorales	f__Ramalinaceae	g__unclassified_f__Ramalinaceae	s__unclassified_f__Ramalinaceae	OTU1246	174	0.000621251	0.222222
d__Eukaryota	k__Fungi	p__Ascomycota	c__Sordariomycetes	o__Xylariales	f__Amphisphaeriaceae	g__Lepteutypa	s__unclassified_g__Lepteutypa	OTU559	1	3.57041e-06	0.111111
d__Eukaryota	k__Fungi	p__Ascomycota	c__Dothideomycetes	o__Pleosporales	f__Phaeosphaeriaceae	g__Setophoma	s__Setophoma_sacchari	OTU2061	1	3.57041e-06	0.111111
d__Eukaryota	k__Fungi	p__Ascomycota	c__Eurotiomycetes	o__Eurotiales	f__Aspergillaceae	g__Aspergillus	s__Aspergillus_gracilis	OTU859	24	8.56898e-05	0.111111
d__Eukaryota	k__Fungi	p__Ascomycota	c__Sordariomycetes	o__Diaporthales	f__Diaporthaceae	g__Diaporthe	s__unclassified_g__Diaporthe	OTU1062	2	7.14082e-06	0.111111
d__Eukaryota	k__Fungi	p__Ascomycota	c__unclassified_p__Ascomycota	o__unclassified_p__Ascomycota	f__unclassified_p__Ascomycota	g__unclassified_p__Ascomycota	s__unclassified_p__Ascomycota	OTU624	22	7.8549e-05	0.222222
d__Eukaryota	k__Fungi	p__Ascomycota	c__Sordariomycetes	o__Xylariales	f__unclassified_o__Xylariales	g__unclassified_o__Xylariales	s__unclassified_o__Xylariales	OTU1350	20	7.14082e-05	0.222222
d__Eukaryota	k__Fungi	p__unclassified_k__Fungi	c__unclassified_k__Fungi	o__unclassified_k__Fungi	f__unclassified_k__Fungi	g__unclassified_k__Fungi	s__unclassified_k__Fungi	OTU1024	2	7.14082e-06	0.111111
d__Eukaryota	k__Fungi	p__Basidiomycota	c__Agaricomycetes	o__Agaricales	f__Psathyrellaceae	g__Coprinellus	s__Coprinellus_angulatus	OTU1295	2	7.14082e-06	0.111111
d__Eukaryota	k__Fungi	p__Basidiomycota	c__Agaricomycetes	o__Agaricales	f__Strophariaceae	g__Deconica	s__Deconica_sp	OTU1641	8	2.85633e-05	0.111111
d__Eukaryota	k__Fungi	p__Ascomycota	c__Eurotiomycetes	o__Chaetothyriales	f__Chaetothyriales_fam_Incertae_sedis	g__Strelitziana	s__unclassified_g__Strelitziana	OTU1301	4	1.42816e-05	0.111111
d__Eukaryota	k__Fungi	p__Ascomycota	c__Sordariomycetes	o__unclassified_c__Sordariomycetes	f__unclassified_c__Sordariomycetes	g__unclassified_c__Sordariomycetes	s__unclassified_c__Sordariomycetes	OTU564	3	1.07112e-05	0.111111
d__Eukaryota	k__Fungi	p__Ascomycota	c__Dothideomycetes	o__Capnodiales	f__unclassified_o__Capnodiales	g__unclassified_o__Capnodiales	s__unclassified_o__Capnodiales	OTU1355	11	3.92745e-05	0.111111
d__Eukaryota	k__Fungi	p__Ascomycota	c__Eurotiomycetes	o__Chaetothyriales	f__unclassified_o__Chaetothyriales	g__unclassified_o__Chaetothyriales	s__unclassified_o__Chaetothyriales	OTU1417	3	1.07112e-05	0.111111
d__Eukaryota	k__Fungi	p__Ascomycota	c__Sordariomycetes	o__unclassified_c__Sordariomycetes	f__unclassified_c__Sordariomycetes	g__unclassified_c__Sordariomycetes	s__unclassified_c__Sordariomycetes	OTU1117	6	2.14225e-05	0.111111
d__Eukaryota	k__Fungi	p__Ascomycota	c__Dothideomycetes	o__Pleosporales	f__unclassified_o__Pleosporales	g__unclassified_o__Pleosporales	s__unclassified_o__Pleosporales	OTU1364	80	0.000285633	0.111111
d__Eukaryota	k__Fungi	p__Ascomycota	c__Eurotiomycetes	o__unclassified_c__Eurotiomycetes	f__unclassified_c__Eurotiomycetes	g__unclassified_c__Eurotiomycetes	s__unclassified_c__Eurotiomycetes	OTU1182	4	1.42816e-05	0.222222
d__Eukaryota	k__Fungi	p__Ascomycota	c__Leotiomycetes	o__Helotiales	f__Rutstroemiaceae	g__Lambertella	s__Lambertella_sp	OTU936	5	1.7852e-05	0.111111
d__Eukaryota	k__Fungi	p__Basidiomycota	c__Agaricomycetes	o__Agaricales	f__unclassified_o__Agaricales	g__unclassified_o__Agaricales	s__unclassified_o__Agaricales	OTU1263	14	4.99857e-05	0.222222
d__Eukaryota	k__Fungi	p__Ascomycota	c__Dothideomycetes	o__Pleosporales	f__Phaeosphaeriaceae	g__Setophoma	s__Setophoma_sp	OTU1195	11	3.92745e-05	0.333333
d__Eukaryota	k__Fungi	p__Ascomycota	c__Sordariomycetes	o__unclassified_c__Sordariomycetes	f__unclassified_c__Sordariomycetes	g__unclassified_c__Sordariomycetes	s__unclassified_c__Sordariomycetes	OTU1201	34	0.000121394	0.111111
d__Eukaryota	k__Fungi	p__Ascomycota	c__Dothideomycetes	o__Capnodiales	f__Mycosphaerellaceae	g__unclassified_f__Mycosphaerellaceae	s__unclassified_f__Mycosphaerellaceae	OTU1496	535	0.00191017	0.333333
d__Eukaryota	k__Fungi	p__Ascomycota	c__Eurotiomycetes	o__Chaetothyriales	f__unclassified_o__Chaetothyriales	g__unclassified_o__Chaetothyriales	s__unclassified_o__Chaetothyriales	OTU1186	4	1.42816e-05	0.222222
d__Eukaryota	k__Fungi	p__Ascomycota	c__Dothideomycetes	o__Pleosporales	f__Torulaceae	g__Dendryphion	s__Dendryphion_sp	OTU1284	23	8.21194e-05	0.222222
d__Eukaryota	k__Fungi	p__Ascomycota	c__Eurotiomycetes	o__Chaetothyriales	f__Cyphellophoraceae	g__Cyphellophora	s__Cyphellophora_eucalypti	OTU118	357	0.00127464	0.333333
d__Eukaryota	k__Fungi	p__Ascomycota	c__Sordariomycetes	o__unclassified_c__Sordariomycetes	f__unclassified_c__Sordariomycetes	g__unclassified_c__Sordariomycetes	s__unclassified_c__Sordariomycetes	OTU966	27	9.6401e-05	0.333333
d__Eukaryota	k__Fungi	p__Ascomycota	c__Sordariomycetes	o__unclassified_c__Sordariomycetes	f__unclassified_c__Sordariomycetes	g__unclassified_c__Sordariomycetes	s__unclassified_c__Sordariomycetes	OTU789	1	3.57041e-06	0.111111
d__Eukaryota	k__Fungi	p__Ascomycota	c__Sordariomycetes	o__unclassified_c__Sordariomycetes	f__unclassified_c__Sordariomycetes	g__unclassified_c__Sordariomycetes	s__unclassified_c__Sordariomycetes	OTU1332	5	1.7852e-05	0.111111
d__Eukaryota	k__Fungi	p__Ascomycota	c__Sordariomycetes	o__Xylariales	f__Xylariaceae	g__Hypoxylon	s__Hypoxylon_trugodes	OTU2051	22	7.8549e-05	0.444444
d__Eukaryota	k__Fungi	p__Ascomycota	c__Eurotiomycetes	o__Chaetothyriales	f__Chaetothyriales_fam_Incertae_sedis	g__Strelitziana	s__Strelitziana_malaysiana	OTU1327	6	2.14225e-05	0.222222
d__Eukaryota	k__Fungi	p__Ascomycota	c__Sordariomycetes	o__Hypocreales	f__Nectriaceae	g__Xenoacremonium	s__Xenoacremonium_recifei	OTU1296	6	2.14225e-05	0.222222
d__Eukaryota	k__Fungi	p__Ascomycota	c__Sordariomycetes	o__Xylariales	f__Xylariaceae	g__Hypoxylon	s__Hypoxylon_pilgerianum	OTU1287	5	1.7852e-05	0.111111
d__Eukaryota	k__Fungi	p__Basidiomycota	c__Tremellomycetes	o__Trichosporonales	f__Trichosporonaceae	g__Cutaneotrichosporon	s__Cutaneotrichosporon_guehoae	OTU895	2337	0.00834404	1
d__Eukaryota	k__Fungi	p__unclassified_k__Fungi	c__unclassified_k__Fungi	o__unclassified_k__Fungi	f__unclassified_k__Fungi	g__unclassified_k__Fungi	s__unclassified_k__Fungi	OTU772	3	1.07112e-05	0.222222
d__Eukaryota	k__Fungi	p__Ascomycota	c__Sordariomycetes	o__Diaporthales	f__unclassified_o__Diaporthales	g__unclassified_o__Diaporthales	s__unclassified_o__Diaporthales	OTU798	2	7.14082e-06	0.111111
d__Eukaryota	k__Fungi	p__Ascomycota	c__Sordariomycetes	o__Trichosphaeriales	f__Trichosphaeriaceae	g__Nigrospora	s__Nigrospora_oryzae	OTU2052	294	0.0010497	0.666667
d__Eukaryota	k__Fungi	p__Ascomycota	c__Eurotiomycetes	o__Chaetothyriales	f__Trichomeriaceae	g__unclassified_f__Trichomeriaceae	s__Trichomeriaceae_sp	OTU915	22	7.8549e-05	0.111111
d__Eukaryota	k__Fungi	p__Ascomycota	c__Saccharomycetes	o__Saccharomycetales	f__Saccharomycetales_fam_Incertae_sedis	g__Candida	s__Candida_tropicalis	OTU899	103	0.000367752	0.444444
d__Eukaryota	k__Fungi	p__Ascomycota	c__Dothideomycetes	o__Pleosporales	f__Thyridariaceae	g__unclassified_f__Thyridariaceae	s__unclassified_f__Thyridariaceae	OTU972	1	3.57041e-06	0.111111
d__Eukaryota	k__Fungi	p__Basidiomycota	c__Agaricomycetes	o__Cantharellales	f__Cantharellales_fam_Incertae_sedis	g__Minimedusa	s__Minimedusa_polyspora	OTU1108	21	7.49786e-05	0.111111
d__Eukaryota	k__Fungi	p__Ascomycota	c__Sordariomycetes	o__Hypocreales	f__Hypocreales_fam_Incertae_sedis	g__Sarocladium	s__Sarocladium_strictum	OTU1059	2	7.14082e-06	0.222222
d__Eukaryota	k__Fungi	p__Basidiomycota	c__Tremellomycetes	o__Tremellales	f__Tremellaceae	g__Cryptococcus_f__Tremellaceae	s__Cryptococcus_dimennae	OTU1407	2	7.14082e-06	0.111111
d__Eukaryota	k__Fungi	p__Basidiomycota	c__Agaricomycetes	o__unclassified_c__Agaricomycetes	f__unclassified_c__Agaricomycetes	g__unclassified_c__Agaricomycetes	s__unclassified_c__Agaricomycetes	OTU1039	32	0.000114253	0.111111
d__Eukaryota	k__Fungi	p__Basidiomycota	c__Agaricomycetes	o__Agaricales	f__Bolbitiaceae	g__Agrocybe	s__Agrocybe_praecox	OTU975	1	3.57041e-06	0.111111
d__Eukaryota	k__Fungi	p__Basidiomycota	c__Agaricomycetes	o__unclassified_c__Agaricomycetes	f__unclassified_c__Agaricomycetes	g__unclassified_c__Agaricomycetes	s__unclassified_c__Agaricomycetes	OTU1036	84	0.000299914	0.222222
d__Eukaryota	k__Fungi	p__Ascomycota	c__Eurotiomycetes	o__Chaetothyriales	f__Trichomeriaceae	g__Trichomerium	s__unclassified_g__Trichomerium	OTU1223	19	6.78378e-05	0.111111
d__Eukaryota	k__Fungi	p__Ascomycota	c__Sordariomycetes	o__Xylariales	f__Xylariaceae	g__Rosellinia	s__Rosellinia_subiculata	OTU1352	15	5.35561e-05	0.111111
d__Eukaryota	k__Fungi	p__Ascomycota	c__Sordariomycetes	o__Hypocreales	f__Nectriaceae	g__unclassified_f__Nectriaceae	s__unclassified_f__Nectriaceae	OTU1382	6	2.14225e-05	0.111111
d__Eukaryota	k__Fungi	p__Ascomycota	c__Dothideomycetes	o__Pleosporales	f__Torulaceae	g__Torula	s__Torula_herbarum	OTU2012	9	3.21337e-05	0.111111
d__Eukaryota	k__Fungi	p__Ascomycota	c__unclassified_p__Ascomycota	o__unclassified_p__Ascomycota	f__unclassified_p__Ascomycota	g__unclassified_p__Ascomycota	s__unclassified_p__Ascomycota	OTU1158	4	1.42816e-05	0.111111
d__Eukaryota	k__Fungi	p__Ascomycota	c__Leotiomycetes	o__Rhytismatales	f__Rhytismataceae	g__Leptostroma	s__Leptostroma_sp	OTU621	44	0.000157098	0.111111
d__Eukaryota	k__Fungi	p__Ascomycota	c__unclassified_p__Ascomycota	o__unclassified_p__Ascomycota	f__unclassified_p__Ascomycota	g__unclassified_p__Ascomycota	s__unclassified_p__Ascomycota	OTU1480	7	2.49929e-05	0.222222
d__Eukaryota	k__Fungi	p__Ascomycota	c__Eurotiomycetes	o__Eurotiales	f__Aspergillaceae	g__Penicillium	s__Penicillium_parviverrucosum	OTU1337	5	1.7852e-05	0.111111
d__Eukaryota	k__Fungi	p__Ascomycota	c__Sordariomycetes	o__Hypocreales	f__Clavicipitaceae	g__Metarhizium	s__unclassified_g__Metarhizium	OTU918	70	0.000249929	0.111111
d__Eukaryota	k__Fungi	p__Ascomycota	c__Sordariomycetes	o__Xylariales	f__Sporocadaceae	g__unclassified_f__Sporocadaceae	s__unclassified_f__Sporocadaceae	OTU130	1	3.57041e-06	0.111111
d__Eukaryota	k__Fungi	p__Basidiomycota	c__Tremellomycetes	o__Tremellales	f__unclassified_o__Tremellales	g__unclassified_o__Tremellales	s__unclassified_o__Tremellales	OTU642	20	7.14082e-05	0.111111
d__Eukaryota	k__Fungi	p__Ascomycota	c__Sordariomycetes	o__Hypocreales	f__Nectriaceae	g__unclassified_f__Nectriaceae	s__unclassified_f__Nectriaceae	OTU909	73	0.00026064	0.111111
d__Eukaryota	k__Fungi	p__Ascomycota	c__Sordariomycetes	o__unclassified_c__Sordariomycetes	f__unclassified_c__Sordariomycetes	g__unclassified_c__Sordariomycetes	s__unclassified_c__Sordariomycetes	OTU579	7	2.49929e-05	0.222222
d__Eukaryota	k__Fungi	p__Ascomycota	c__Sordariomycetes	o__Diaporthales	f__Diaporthaceae	g__Diaporthe	s__unclassified_g__Diaporthe	OTU1170	2	7.14082e-06	0.111111
d__Eukaryota	k__Fungi	p__Ascomycota	c__Dothideomycetes	o__Venturiales	f__Sympoventuriaceae	g__Neocoleroa	s__Neocoleroa_metrosideri	OTU1398	166	0.000592688	0.222222
d__Eukaryota	k__Fungi	p__Ascomycota	c__Eurotiomycetes	o__Chaetothyriales	f__Cyphellophoraceae	g__Cyphellophora	s__Cyphellophora_laciniata	OTU991	20	7.14082e-05	0.333333
d__Eukaryota	k__Fungi	p__Ascomycota	c__Sordariomycetes	o__Xylariales	f__Amphisphaeriaceae	g__Amphisphaeria	s__unclassified_g__Amphisphaeria	OTU957	15	5.35561e-05	0.222222
d__Eukaryota	k__Fungi	p__Ascomycota	c__Sordariomycetes	o__Diaporthales	f__Gnomoniaceae	g__Ophiognomonia	s__Ophiognomonia_apiospora	OTU978	6	2.14225e-05	0.111111
d__Eukaryota	k__Fungi	p__Ascomycota	c__Dothideomycetes	o__Capnodiales	f__unclassified_o__Capnodiales	g__unclassified_o__Capnodiales	s__unclassified_o__Capnodiales	OTU1218	2	7.14082e-06	0.111111
d__Eukaryota	k__Fungi	p__Basidiomycota	c__Agaricomycetes	o__Geastrales	f__Geastraceae	g__Geastrum	s__Geastrum_sp	OTU1042	1	3.57041e-06	0.111111
d__Eukaryota	k__Fungi	p__unclassified_k__Fungi	c__unclassified_k__Fungi	o__unclassified_k__Fungi	f__unclassified_k__Fungi	g__unclassified_k__Fungi	s__unclassified_k__Fungi	OTU1141	2	7.14082e-06	0.111111
d__Eukaryota	k__Fungi	p__Ascomycota	c__Dothideomycetes	o__Botryosphaeriales	f__Botryosphaeriaceae	g__Microdiplodia	s__Microdiplodia_miyakei	OTU2027	19	6.78378e-05	0.222222
d__Eukaryota	k__Fungi	p__Basidiomycota	c__Agaricomycetes	o__Thelephorales	f__Thelephoraceae	g__Tomentella	s__Tomentella_sp	OTU1236	4	1.42816e-05	0.111111
d__Eukaryota	k__Fungi	p__Basidiomycota	c__Tremellomycetes	o__Cystofilobasidiales	f__Mrakiaceae	g__Tausonia	s__Tausonia_pullulans	OTU588	39	0.000139246	0.111111
d__Eukaryota	k__Fungi	p__Ascomycota	c__Sordariomycetes	o__Xylariales	f__unclassified_o__Xylariales	g__unclassified_o__Xylariales	s__unclassified_o__Xylariales	OTU1589	1	3.57041e-06	0.111111
d__Eukaryota	k__Fungi	p__Ascomycota	c__Eurotiomycetes	o__Chaetothyriales	f__Cyphellophoraceae	g__Cyphellophora	s__unclassified_g__Cyphellophora	OTU963	183	0.000653385	0.333333
d__Eukaryota	k__Fungi	p__Ascomycota	c__Eurotiomycetes	o__Chaetothyriales	f__Herpotrichiellaceae	g__Exophiala	s__unclassified_g__Exophiala	OTU52	12	4.28449e-05	0.333333
d__Eukaryota	k__Fungi	p__Ascomycota	c__Sordariomycetes	o__unclassified_c__Sordariomycetes	f__unclassified_c__Sordariomycetes	g__unclassified_c__Sordariomycetes	s__unclassified_c__Sordariomycetes	OTU1324	1	3.57041e-06	0.111111
d__Eukaryota	k__Fungi	p__Ascomycota	c__Dothideomycetes	o__Pleosporales	f__Didymellaceae	g__unclassified_f__Didymellaceae	s__unclassified_f__Didymellaceae	OTU757	39	0.000139246	0.333333
d__Eukaryota	k__Fungi	p__Ascomycota	c__Sordariomycetes	o__Xylariales	f__Xylariaceae	g__Nemania	s__Nemania_pouzarii	OTU1348	6	2.14225e-05	0.111111
d__Eukaryota	k__Fungi	p__Ascomycota	c__Sordariomycetes	o__Hypocreales	f__Hypocreales_fam_Incertae_sedis	g__Emericellopsis	s__Emericellopsis_terricola	OTU659	8	2.85633e-05	0.111111
d__Eukaryota	k__Fungi	p__Ascomycota	c__Sordariomycetes	o__Xylariales	f__Xylariaceae	g__Xylaria	s__Xylaria_escharoidea	OTU2004	6	2.14225e-05	0.333333
d__Eukaryota	k__Fungi	p__Ascomycota	c__Dothideomycetes	o__Pleosporales	f__Pleosporaceae	g__Alternaria	s__unclassified_g__Alternaria	OTU1503	106	0.000378463	0.777778
d__Eukaryota	k__Fungi	p__Basidiomycota	c__Agaricomycetes	o__Cantharellales	f__Ceratobasidiaceae	g__Ceratobasidium	s__Ceratobasidium_sp	OTU1354	12	4.28449e-05	0.222222
d__Eukaryota	k__Fungi	p__Ascomycota	c__Sordariomycetes	o__unclassified_c__Sordariomycetes	f__unclassified_c__Sordariomycetes	g__unclassified_c__Sordariomycetes	s__unclassified_c__Sordariomycetes	OTU809	7	2.49929e-05	0.333333
d__Eukaryota	k__Fungi	p__Ascomycota	c__Sordariomycetes	o__Xylariales	f__Xylariaceae	g__unclassified_f__Xylariaceae	s__unclassified_f__Xylariaceae	OTU1303	1	3.57041e-06	0.111111
d__Eukaryota	k__Fungi	p__Ascomycota	c__Dothideomycetes	o__Pleosporales	f__Lophiotremataceae	g__Lophiotrema	s__Lophiotrema_rubi	OTU1393	5	1.7852e-05	0.111111
d__Eukaryota	k__Fungi	p__Ascomycota	c__Sordariomycetes	o__Hypocreales	f__Stachybotryaceae	g__Myxospora	s__unclassified_g__Myxospora	OTU1462	1	3.57041e-06	0.111111
d__Eukaryota	k__Fungi	p__Basidiomycota	c__Tremellomycetes	o__Tremellales	f__Bulleribasidiaceae	g__Vishniacozyma	s__Vishniacozyma_dimennae	OTU528	4	1.42816e-05	0.111111
d__Eukaryota	k__Fungi	p__Ascomycota	c__Sordariomycetes	o__Diaporthales	f__Diaporthaceae	g__Diaporthe	s__unclassified_g__Diaporthe	OTU1249	13	4.64153e-05	0.222222
d__Eukaryota	k__Fungi	p__Ascomycota	c__Dothideomycetes	o__Venturiales	f__Sympoventuriaceae	g__Scolecobasidium	s__Scolecobasidium_constrictum	OTU1019	2	7.14082e-06	0.111111
d__Eukaryota	k__Fungi	p__Basidiomycota	c__unclassified_p__Basidiomycota	o__unclassified_p__Basidiomycota	f__unclassified_p__Basidiomycota	g__unclassified_p__Basidiomycota	s__unclassified_p__Basidiomycota	OTU1252	8	2.85633e-05	0.111111
d__Eukaryota	k__Fungi	p__Ascomycota	c__Sordariomycetes	o__Sordariales	f__Helminthosphaeriaceae	g__Endophragmiella	s__Endophragmiella_constricta	OTU842	5	1.7852e-05	0.222222
d__Eukaryota	k__Fungi	p__Ascomycota	c__Sordariomycetes	o__Hypocreales	f__Hypocreales_fam_Incertae_sedis	g__Xylochrysis	s__Xylochrysis_lucida	OTU1285	5	1.7852e-05	0.111111
d__Eukaryota	k__Fungi	p__unclassified_k__Fungi	c__unclassified_k__Fungi	o__unclassified_k__Fungi	f__unclassified_k__Fungi	g__unclassified_k__Fungi	s__unclassified_k__Fungi	OTU1400	2	7.14082e-06	0.111111
d__Eukaryota	k__Fungi	p__Ascomycota	c__unclassified_p__Ascomycota	o__unclassified_p__Ascomycota	f__unclassified_p__Ascomycota	g__unclassified_p__Ascomycota	s__unclassified_p__Ascomycota	OTU1053	7	2.49929e-05	0.111111
d__Eukaryota	k__Fungi	p__Basidiomycota	c__Agaricomycetes	o__Thelephorales	f__Thelephoraceae	g__unclassified_f__Thelephoraceae	s__Thelephoraceae_sp	OTU1375	7	2.49929e-05	0.222222
d__Eukaryota	k__Fungi	p__Ascomycota	c__Sordariomycetes	o__Hypocreales	f__unclassified_o__Hypocreales	g__unclassified_o__Hypocreales	s__unclassified_o__Hypocreales	OTU1399	155	0.000553413	0.111111
d__Eukaryota	k__Fungi	p__Ascomycota	c__Eurotiomycetes	o__Chaetothyriales	f__Herpotrichiellaceae	g__Exophiala	s__unclassified_g__Exophiala	OTU1109	6	2.14225e-05	0.111111
d__Eukaryota	k__Fungi	p__Basidiomycota	c__Agaricomycetes	o__Agaricales	f__Psathyrellaceae	g__Coprinellus	s__Coprinellus_heterothrix	OTU117	17	6.06969e-05	0.222222
d__Eukaryota	k__Fungi	p__Ascomycota	c__unclassified_p__Ascomycota	o__unclassified_p__Ascomycota	f__unclassified_p__Ascomycota	g__unclassified_p__Ascomycota	s__unclassified_p__Ascomycota	OTU1239	6	2.14225e-05	0.111111
d__Eukaryota	k__Fungi	p__Ascomycota	c__Sordariomycetes	o__Glomerellales	f__Plectosphaerellaceae	g__Gibellulopsis	s__Gibellulopsis_nigrescens	OTU560	105	0.000374893	0.333333
d__Eukaryota	k__Fungi	p__Basidiomycota	c__Agaricomycetes	o__Thelephorales	f__Thelephoraceae	g__unclassified_f__Thelephoraceae	s__Thelephoraceae_sp	OTU379	2	7.14082e-06	0.111111
d__Eukaryota	k__Fungi	p__Basidiomycota	c__Agaricomycetes	o__Agaricales	f__Strophariaceae	g__Psilocybe	s__Psilocybe_definita	OTU740	3	1.07112e-05	0.111111
d__Eukaryota	k__Fungi	p__Ascomycota	c__Dothideomycetes	o__Pleosporales	f__Thyridariaceae	g__Roussoella	s__Roussoella_sp	OTU485	2	7.14082e-06	0.222222
d__Eukaryota	k__Fungi	p__Ascomycota	c__unclassified_p__Ascomycota	o__unclassified_p__Ascomycota	f__unclassified_p__Ascomycota	g__unclassified_p__Ascomycota	s__unclassified_p__Ascomycota	OTU460	3	1.07112e-05	0.111111
d__Eukaryota	k__Fungi	p__Ascomycota	c__Sordariomycetes	o__Sordariales	f__Sordariaceae	g__Gelasinospora	s__unclassified_g__Gelasinospora	OTU285	30	0.000107112	0.111111
d__Eukaryota	k__Fungi	p__Ascomycota	c__Sordariomycetes	o__Hypocreales	f__Hypocreaceae	g__Trichoderma	s__unclassified_g__Trichoderma	OTU248	6	2.14225e-05	0.222222
d__Eukaryota	k__Fungi	p__Ascomycota	c__Sordariomycetes	o__Diaporthales	f__Diaporthaceae	g__Diaporthe	s__unclassified_g__Diaporthe	OTU1190	409	0.0014603	0.555556
d__Eukaryota	k__Fungi	p__Ascomycota	c__Sordariomycetes	o__Hypocreales	f__Stachybotryaceae	g__Albifimbria	s__Albifimbria_verrucaria	OTU2119	9	3.21337e-05	0.111111
d__Eukaryota	k__Fungi	p__Ascomycota	c__Dothideomycetes	o__Pleosporales	f__Phaeosphaeriaceae	g__Setophoma	s__Setophoma_sp	OTU1220	32	0.000114253	0.444444
d__Eukaryota	k__Fungi	p__Ascomycota	c__unclassified_p__Ascomycota	o__unclassified_p__Ascomycota	f__unclassified_p__Ascomycota	g__unclassified_p__Ascomycota	s__unclassified_p__Ascomycota	OTU979	108	0.000385604	0.333333
d__Eukaryota	k__Fungi	p__Ascomycota	c__Eurotiomycetes	o__Chaetothyriales	f__Chaetothyriales_fam_Incertae_sedis	g__Strelitziana	s__Strelitziana_africana	OTU1458	5	1.7852e-05	0.111111
d__Eukaryota	k__Fungi	p__Ascomycota	c__Eurotiomycetes	o__Chaetothyriales	f__Chaetothyriales_fam_Incertae_sedis	g__Strelitziana	s__unclassified_g__Strelitziana	OTU1205	18	6.42674e-05	0.111111
d__Eukaryota	k__Fungi	p__Ascomycota	c__Dothideomycetes	o__Pleosporales	f__Periconiaceae	g__Periconia	s__Periconia_elaeidis	OTU2123	1	3.57041e-06	0.111111
d__Eukaryota	k__Fungi	p__Ascomycota	c__Saccharomycetes	o__Saccharomycetales	f__Saccharomycetaceae	g__Eremothecium	s__Eremothecium_coryli	OTU837	8	2.85633e-05	0.111111
d__Eukaryota	k__Fungi	p__Ascomycota	c__Dothideomycetes	o__Pleosporales	f__Pleosporaceae	g__Alternaria	s__Alternaria_longissima	OTU2076	152	0.000542702	0.333333
d__Eukaryota	k__Fungi	p__Ascomycota	c__Sordariomycetes	o__Glomerellales	f__unclassified_o__Glomerellales	g__unclassified_o__Glomerellales	s__unclassified_o__Glomerellales	OTU554	3	1.07112e-05	0.222222
d__Eukaryota	k__Fungi	p__Ascomycota	c__Orbiliomycetes	o__Orbiliales	f__Orbiliaceae	g__unclassified_f__Orbiliaceae	s__unclassified_f__Orbiliaceae	OTU1202	3	1.07112e-05	0.111111
d__Eukaryota	k__Fungi	p__Ascomycota	c__Sordariomycetes	o__Diaporthales	f__Diaporthaceae	g__Diaporthe	s__unclassified_g__Diaporthe	OTU607	26	9.28306e-05	0.444444
d__Eukaryota	k__Fungi	p__Ascomycota	c__Dothideomycetes	o__Capnodiales	f__Teratosphaeriaceae	g__unclassified_f__Teratosphaeriaceae	s__unclassified_f__Teratosphaeriaceae	OTU1333	9	3.21337e-05	0.111111
d__Eukaryota	k__Fungi	p__Basidiomycota	c__Microbotryomycetes	o__Microbotryomycetes_ord_Incertae_sedis	f__Chrysozymaceae	g__Pseudohyphozyma	s__Pseudohyphozyma_bogoriensis	OTU912	1383	0.00493787	0.666667
d__Eukaryota	k__Fungi	p__Basidiomycota	c__Microbotryomycetes	o__Microbotryomycetes_ord_Incertae_sedis	f__Chrysozymaceae	g__Pseudohyphozyma	s__Pseudohyphozyma_bogoriensis	OTU910	16	5.71265e-05	0.111111
d__Eukaryota	k__Fungi	p__Ascomycota	c__Saccharomycetes	o__Saccharomycetales	f__Pichiaceae	g__Pichia	s__unclassified_g__Pichia	OTU787	2	7.14082e-06	0.111111
d__Eukaryota	k__Fungi	p__Ascomycota	c__Sordariomycetes	o__Glomerellales	f__Glomerellaceae	g__Colletotrichum	s__unclassified_g__Colletotrichum	OTU960	45	0.000160668	0.222222
d__Eukaryota	k__Fungi	p__Ascomycota	c__Sordariomycetes	o__unclassified_c__Sordariomycetes	f__unclassified_c__Sordariomycetes	g__unclassified_c__Sordariomycetes	s__unclassified_c__Sordariomycetes	OTU846	4	1.42816e-05	0.111111
d__Eukaryota	k__Fungi	p__Basidiomycota	c__Agaricomycetes	o__Polyporales	f__Ganodermataceae	g__Ganoderma	s__Ganoderma_sp	OTU1207	4	1.42816e-05	0.111111
d__Eukaryota	k__Fungi	p__Ascomycota	c__Sordariomycetes	o__Hypocreales	f__Hypocreales_fam_Incertae_sedis	g__Acremonium	s__Acremonium_polychromum	OTU1100	6	2.14225e-05	0.111111
d__Eukaryota	k__Fungi	p__Ascomycota	c__Sordariomycetes	o__Xylariales	f__Xylariaceae	g__Hypoxylon	s__Hypoxylon_fendleri	OTU1208	3	1.07112e-05	0.111111
d__Eukaryota	k__Fungi	p__Ascomycota	c__Eurotiomycetes	o__Eurotiales	f__Trichocomaceae	g__Talaromyces	s__unclassified_g__Talaromyces	OTU1349	5	1.7852e-05	0.111111
d__Eukaryota	k__Fungi	p__Ascomycota	c__unclassified_p__Ascomycota	o__unclassified_p__Ascomycota	f__unclassified_p__Ascomycota	g__unclassified_p__Ascomycota	s__unclassified_p__Ascomycota	OTU980	1	3.57041e-06	0.111111
d__Eukaryota	k__Fungi	p__Ascomycota	c__Leotiomycetes	o__Helotiales	f__Helotiaceae	g__Articulospora	s__Articulospora_sp	OTU50	3	1.07112e-05	0.111111
d__Eukaryota	k__Fungi	p__Basidiomycota	c__Tremellomycetes	o__Filobasidiales	f__Filobasidiaceae	g__Filobasidium	s__Filobasidium_oeirense	OTU1153	2	7.14082e-06	0.111111
d__Eukaryota	k__Fungi	p__Ascomycota	c__Dothideomycetes	o__Pleosporales	f__Didymellaceae	g__Boeremia	s__Boeremia_exigua	OTU386	79	0.000282062	0.555556
d__Eukaryota	k__Fungi	p__Basidiomycota	c__Tremellomycetes	o__Tremellales	f__Tremellaceae	g__Cryptococcus_f__Tremellaceae	s__Cryptococcus_dimennae	OTU398	3	1.07112e-05	0.111111
d__Eukaryota	k__Fungi	p__Ascomycota	c__Dothideomycetes	o__Pleosporales	f__Phaeosphaeriaceae	g__Phaeosphaeriopsis	s__Phaeosphaeriopsis_sp	OTU2080	2	7.14082e-06	0.111111
d__Eukaryota	k__Fungi	p__Ascomycota	c__Sordariomycetes	o__Diaporthales	f__Diaporthaceae	g__Diaporthe	s__unclassified_g__Diaporthe	OTU776	3	1.07112e-05	0.111111
d__Eukaryota	k__Fungi	p__Ascomycota	c__Sordariomycetes	o__Diaporthales	f__Diaporthaceae	g__Diaporthe	s__unclassified_g__Diaporthe	OTU775	33	0.000117823	0.555556
d__Eukaryota	k__Fungi	p__Ascomycota	c__Sordariomycetes	o__Diaporthales	f__Diaporthaceae	g__Diaporthe	s__unclassified_g__Diaporthe	OTU779	6	2.14225e-05	0.111111
d__Eukaryota	k__Fungi	p__Ascomycota	c__Dothideomycetes	o__Pleosporales	f__Massarinaceae	g__Helminthosporium	s__Helminthosporium_velutinum	OTU628	1	3.57041e-06	0.111111
d__Eukaryota	k__Fungi	p__Ascomycota	c__Dothideomycetes	o__Pleosporales	f__Phaeosphaeriaceae	g__Setophaeosphaeria	s__Setophaeosphaeria_citricola	OTU2009	96	0.000342759	0.111111
d__Eukaryota	k__Fungi	p__Ascomycota	c__Dothideomycetes	o__Pleosporales	f__Didymosphaeriaceae	g__Montagnula	s__unclassified_g__Montagnula	OTU2156	2	7.14082e-06	0.111111
d__Eukaryota	k__Fungi	p__Ascomycota	c__Eurotiomycetes	o__Chaetothyriales	f__Herpotrichiellaceae	g__Cladophialophora	s__unclassified_g__Cladophialophora	OTU1014	8	2.85633e-05	0.222222
d__Eukaryota	k__Fungi	p__Ascomycota	c__Eurotiomycetes	o__Eurotiales	f__Aspergillaceae	g__Penicillium	s__Penicillium_daejeonium	OTU1118	2	7.14082e-06	0.111111
d__Eukaryota	k__Fungi	p__unclassified_k__Fungi	c__unclassified_k__Fungi	o__unclassified_k__Fungi	f__unclassified_k__Fungi	g__unclassified_k__Fungi	s__unclassified_k__Fungi	OTU615	1	3.57041e-06	0.111111
d__Eukaryota	k__Fungi	p__Ascomycota	c__Sordariomycetes	o__Xylariales	f__Xylariaceae	g__unclassified_f__Xylariaceae	s__unclassified_f__Xylariaceae	OTU1986	2	7.14082e-06	0.111111
d__Eukaryota	k__Fungi	p__Ascomycota	c__Sordariomycetes	o__Sordariales	f__Helminthosphaeriaceae	g__Endophragmiella	s__Endophragmiella_constricta	OTU1133	4	1.42816e-05	0.111111
d__Eukaryota	k__Fungi	p__Basidiomycota	c__Agaricomycetes	o__Polyporales	f__Xenasmataceae	g__Xenasmatella	s__Xenasmatella_ardosiaca	OTU1085	1	3.57041e-06	0.111111
d__Eukaryota	k__Fungi	p__Basidiomycota	c__Agaricomycetes	o__Agaricales	f__Strophariaceae	g__Deconica	s__Deconica_sp	OTU8	19	6.78378e-05	0.222222
d__Eukaryota	k__Fungi	p__Basidiomycota	c__Wallemiomycetes	o__Wallemiales	f__Wallemiaceae	g__Wallemia	s__unclassified_g__Wallemia	OTU926	54	0.000192802	0.111111
d__Eukaryota	k__Fungi	p__Ascomycota	c__Sordariomycetes	o__Xylariales	f__Xylariaceae	g__Hypoxylon	s__unclassified_g__Hypoxylon	OTU1125	4	1.42816e-05	0.222222
d__Eukaryota	k__Fungi	p__Basidiomycota	c__Agaricomycetes	o__Agaricales	f__Inocybaceae	g__Inocybe	s__Inocybe_virosa	OTU1764	1	3.57041e-06	0.111111
d__Eukaryota	k__Fungi	p__Ascomycota	c__Dothideomycetes	o__Pleosporales	f__Lophiostomataceae	g__Biappendiculispora	s__Biappendiculispora_japonica	OTU1169	4	1.42816e-05	0.222222
d__Eukaryota	k__Fungi	p__Ascomycota	c__Sordariomycetes	o__Xylariales	f__unclassified_o__Xylariales	g__unclassified_o__Xylariales	s__unclassified_o__Xylariales	OTU1308	3	1.07112e-05	0.111111
d__Eukaryota	k__Fungi	p__Ascomycota	c__Sordariomycetes	o__Xylariales	f__Xylariaceae	g__Xylaria	s__unclassified_g__Xylaria	OTU1754	2	7.14082e-06	0.222222
d__Eukaryota	k__Fungi	p__Ascomycota	c__Dothideomycetes	o__Capnodiales	f__Capnodiaceae	g__Scorias	s__Scorias_sp	OTU1262	14	4.99857e-05	0.111111
d__Eukaryota	k__Fungi	p__Ascomycota	c__Sordariomycetes	o__Diaporthales	f__Diaporthaceae	g__Diaporthe	s__Diaporthe_melonis	OTU643	1	3.57041e-06	0.111111
d__Eukaryota	k__Fungi	p__Ascomycota	c__Dothideomycetes	o__Venturiales	f__Sympoventuriaceae	g__Ochroconis	s__Ochroconis_sp	OTU327	1	3.57041e-06	0.111111
d__Eukaryota	k__Fungi	p__Ascomycota	c__Sordariomycetes	o__Xylariales	f__unclassified_o__Xylariales	g__unclassified_o__Xylariales	s__unclassified_o__Xylariales	OTU82	26	9.28306e-05	0.444444
d__Eukaryota	k__Fungi	p__Ascomycota	c__Sordariomycetes	o__unclassified_c__Sordariomycetes	f__unclassified_c__Sordariomycetes	g__unclassified_c__Sordariomycetes	s__unclassified_c__Sordariomycetes	OTU1475	4	1.42816e-05	0.111111
d__Eukaryota	k__Fungi	p__Ascomycota	c__Dothideomycetes	o__Pleosporales	f__Pleosporales_fam_Incertae_sedis	g__Dokmaia	s__Dokmaia_monthadangi	OTU1523	148	0.00052842	0.444444
d__Eukaryota	k__Fungi	p__Ascomycota	c__Sordariomycetes	o__Hypocreales	f__Hypocreales_fam_Incertae_sedis	g__Acremonium	s__Acremonium_curvulum	OTU1001	1	3.57041e-06	0.111111
d__Eukaryota	k__Fungi	p__Ascomycota	c__Sordariomycetes	o__Diaporthales	f__Diaporthaceae	g__Diaporthe	s__unclassified_g__Diaporthe	OTU800	14	4.99857e-05	0.444444
d__Eukaryota	k__Fungi	p__Ascomycota	c__Sordariomycetes	o__Chaetosphaeriales	f__Chaetosphaeriaceae	g__unclassified_f__Chaetosphaeriaceae	s__unclassified_f__Chaetosphaeriaceae	OTU1081	8	2.85633e-05	0.111111
d__Eukaryota	k__Fungi	p__Ascomycota	c__Eurotiomycetes	o__Eurotiales	f__Aspergillaceae	g__Penicillium	s__Penicillium_cordubense	OTU1546	4	1.42816e-05	0.111111
d__Eukaryota	k__Fungi	p__Glomeromycota	c__Glomeromycetes	o__Diversisporales	f__Diversisporales_fam_Incertae_sedis	g__Entrophospora	s__Entrophospora_sp	OTU1160	1181	0.00421665	0.222222
d__Eukaryota	k__Fungi	p__Ascomycota	c__Dothideomycetes	o__Pleosporales	f__Didymellaceae	g__Didymella	s__Didymella_rosea	OTU470	8	2.85633e-05	0.222222
d__Eukaryota	k__Fungi	p__Ascomycota	c__Sordariomycetes	o__Hypocreales	f__unclassified_o__Hypocreales	g__unclassified_o__Hypocreales	s__unclassified_o__Hypocreales	OTU1149	3	1.07112e-05	0.222222
d__Eukaryota	k__Fungi	p__Glomeromycota	c__Archaeosporomycetes	o__Archaeosporales	f__Archaeosporaceae	g__Archaeospora	s__Archaeospora_schenckii	OTU1385	6	2.14225e-05	0.111111
d__Eukaryota	k__Fungi	p__Ascomycota	c__Sordariomycetes	o__Magnaporthales	f__Magnaporthaceae	g__Pyricularia	s__Pyricularia_parasitica	OTU1162	617	0.00220294	0.222222
d__Eukaryota	k__Fungi	p__Ascomycota	c__unclassified_p__Ascomycota	o__unclassified_p__Ascomycota	f__unclassified_p__Ascomycota	g__unclassified_p__Ascomycota	s__unclassified_p__Ascomycota	OTU2026	4	1.42816e-05	0.111111
d__Eukaryota	k__Fungi	p__Basidiomycota	c__Tremellomycetes	o__Tremellales	f__Rhynchogastremataceae	g__Papiliotrema	s__Papiliotrema_laurentii	OTU601	8112	0.0289632	0.888889
d__Eukaryota	k__Fungi	p__Basidiomycota	c__Tremellomycetes	o__Cystofilobasidiales	f__Mrakiaceae	g__Tausonia	s__Tausonia_pullulans	OTU877	13	4.64153e-05	0.111111
d__Eukaryota	k__Fungi	p__unclassified_k__Fungi	c__unclassified_k__Fungi	o__unclassified_k__Fungi	f__unclassified_k__Fungi	g__unclassified_k__Fungi	s__unclassified_k__Fungi	OTU855	4	1.42816e-05	0.111111
d__Eukaryota	k__Fungi	p__Ascomycota	c__Sordariomycetes	o__unclassified_c__Sordariomycetes	f__unclassified_c__Sordariomycetes	g__unclassified_c__Sordariomycetes	s__unclassified_c__Sordariomycetes	OTU1004	1	3.57041e-06	0.111111
d__Eukaryota	k__Fungi	p__Basidiomycota	c__Tremellomycetes	o__Tremellales	f__unclassified_o__Tremellales	g__unclassified_o__Tremellales	s__unclassified_o__Tremellales	OTU1430	2	7.14082e-06	0.111111
d__Eukaryota	k__Fungi	p__Ascomycota	c__Sordariomycetes	o__unclassified_c__Sordariomycetes	f__unclassified_c__Sordariomycetes	g__unclassified_c__Sordariomycetes	s__unclassified_c__Sordariomycetes	OTU1000	2	7.14082e-06	0.111111
d__Eukaryota	k__Fungi	p__Ascomycota	c__Eurotiomycetes	o__Chaetothyriales	f__unclassified_o__Chaetothyriales	g__unclassified_o__Chaetothyriales	s__unclassified_o__Chaetothyriales	OTU1233	5	1.7852e-05	0.111111
d__Eukaryota	k__Fungi	p__unclassified_k__Fungi	c__unclassified_k__Fungi	o__unclassified_k__Fungi	f__unclassified_k__Fungi	g__unclassified_k__Fungi	s__unclassified_k__Fungi	OTU1286	4	1.42816e-05	0.111111
d__Eukaryota	k__Fungi	p__Ascomycota	c__Dothideomycetes	o__Pleosporales	f__unclassified_o__Pleosporales	g__unclassified_o__Pleosporales	s__unclassified_o__Pleosporales	OTU1743	1	3.57041e-06	0.111111
d__Eukaryota	k__Fungi	p__Ascomycota	c__Lecanoromycetes	o__Lecanorales	f__Pilocarpaceae	g__Byssoloma	s__Byssoloma_marginatum	OTU940	2	7.14082e-06	0.111111
d__Eukaryota	k__Fungi	p__unclassified_k__Fungi	c__unclassified_k__Fungi	o__unclassified_k__Fungi	f__unclassified_k__Fungi	g__unclassified_k__Fungi	s__unclassified_k__Fungi	OTU1199	14	4.99857e-05	0.333333
d__Eukaryota	k__Fungi	p__unclassified_k__Fungi	c__unclassified_k__Fungi	o__unclassified_k__Fungi	f__unclassified_k__Fungi	g__unclassified_k__Fungi	s__unclassified_k__Fungi	OTU1466	3	1.07112e-05	0.111111
d__Eukaryota	k__Fungi	p__Ascomycota	c__Dothideomycetes	o__Botryosphaeriales	f__Phyllostictaceae	g__Phyllosticta	s__Phyllosticta_capitalensis	OTU1516	7051	0.025175	0.666667
d__Eukaryota	k__Fungi	p__Basidiomycota	c__Tremellomycetes	o__Tremellales	f__unclassified_o__Tremellales	g__unclassified_o__Tremellales	s__unclassified_o__Tremellales	OTU875	12	4.28449e-05	0.333333
d__Eukaryota	k__Fungi	p__Ascomycota	c__Dothideomycetes	o__Pleosporales	f__Didymosphaeriaceae	g__Montagnula	s__unclassified_g__Montagnula	OTU941	36	0.000128535	0.222222
d__Eukaryota	k__Fungi	p__Basidiomycota	c__unclassified_p__Basidiomycota	o__unclassified_p__Basidiomycota	f__unclassified_p__Basidiomycota	g__unclassified_p__Basidiomycota	s__unclassified_p__Basidiomycota	OTU263	19	6.78378e-05	0.333333
d__Eukaryota	k__Fungi	p__Ascomycota	c__Saccharomycetes	o__Saccharomycetales	f__Saccharomycetales_fam_Incertae_sedis	g__Diutina	s__Diutina_catenulata	OTU555	2	7.14082e-06	0.111111
d__Eukaryota	k__Fungi	p__Ascomycota	c__Sordariomycetes	o__Xylariales	f__Xylariaceae	g__Xylaria	s__unclassified_g__Xylaria	OTU1211	4	1.42816e-05	0.111111
d__Eukaryota	k__Fungi	p__Ascomycota	c__Dothideomycetes	o__Capnodiales	f__Cladosporiaceae	g__Cladosporium	s__Cladosporium_velox	OTU1213	5	1.7852e-05	0.222222
d__Eukaryota	k__Fungi	p__Ascomycota	c__Leotiomycetes	o__Helotiales	f__Dermateaceae	g__Pezicula	s__unclassified_g__Pezicula	OTU807	29	0.000103542	0.444444
d__Eukaryota	k__Fungi	p__Ascomycota	c__Sordariomycetes	o__Hypocreales	f__Nectriaceae	g__Calonectria	s__unclassified_g__Calonectria	OTU1461	1	3.57041e-06	0.111111
d__Eukaryota	k__Fungi	p__Ascomycota	c__Eurotiomycetes	o__Chaetothyriales	f__Chaetothyriales_fam_Incertae_sedis	g__Strelitziana	s__unclassified_g__Strelitziana	OTU970	121	0.000432019	0.333333
d__Eukaryota	k__Fungi	p__Ascomycota	c__Sordariomycetes	o__Diaporthales	f__Diaporthaceae	g__Diaporthe	s__Diaporthe_masirevicii	OTU2000	3281	0.0117145	0.666667
d__Eukaryota	k__Fungi	p__Ascomycota	c__Sordariomycetes	o__Xylariales	f__Apiosporaceae	g__Arthrinium	s__Arthrinium_marii	OTU1597	39	0.000139246	0.444444
d__Eukaryota	k__Fungi	p__Basidiomycota	c__Tremellomycetes	o__Tremellales	f__Trimorphomycetaceae	g__Saitozyma	s__Saitozyma_sp	OTU927	785	0.00280277	0.555556
d__Eukaryota	k__Fungi	p__Basidiomycota	c__Agaricomycetes	o__Agaricales	f__Psathyrellaceae	g__Psathyrella	s__Psathyrella_sulcatotuberculosa	OTU1225	3	1.07112e-05	0.111111
d__Eukaryota	k__Fungi	p__Ascomycota	c__Sordariomycetes	o__Hypocreales	f__Nectriaceae	g__unclassified_f__Nectriaceae	s__unclassified_f__Nectriaceae	OTU1188	18	6.42674e-05	0.111111
d__Eukaryota	k__Fungi	p__Basidiomycota	c__Tremellomycetes	o__Trichosporonales	f__Trichosporonaceae	g__Apiotrichum	s__Apiotrichum_montevideense	OTU72	4	1.42816e-05	0.222222
d__Eukaryota	k__Fungi	p__Ascomycota	c__Sordariomycetes	o__Hypocreales	f__Clavicipitaceae	g__unclassified_f__Clavicipitaceae	s__unclassified_f__Clavicipitaceae	OTU987	92	0.000328478	0.222222
d__Eukaryota	k__Fungi	p__Ascomycota	c__Eurotiomycetes	o__Chaetothyriales	f__Cyphellophoraceae	g__Cyphellophora	s__Cyphellophora_jingdongensis	OTU521	2	7.14082e-06	0.111111
d__Eukaryota	k__Fungi	p__Ascomycota	c__Sordariomycetes	o__Hypocreales	f__Nectriaceae	g__Fusicolla	s__unclassified_g__Fusicolla	OTU1226	3	1.07112e-05	0.111111
d__Eukaryota	k__Fungi	p__Ascomycota	c__Sordariomycetes	o__Hypocreales	f__Bionectriaceae	g__Clonostachys	s__Clonostachys_sp	OTU905	651	0.00232434	0.555556
d__Eukaryota	k__Fungi	p__Ascomycota	c__Eurotiomycetes	o__Eurotiales	f__Trichocomaceae	g__Talaromyces	s__Talaromyces_purpureogenus	OTU860	5	1.7852e-05	0.111111
d__Eukaryota	k__Fungi	p__Ascomycota	c__Eurotiomycetes	o__Chaetothyriales	f__Herpotrichiellaceae	g__Exophiala	s__Exophiala_sp	OTU1999	35	0.000124964	0.222222
d__Eukaryota	k__Fungi	p__Ascomycota	c__Sordariomycetes	o__Xylariales	f__Apiosporaceae	g__Arthrinium	s__unclassified_g__Arthrinium	OTU1083	3	1.07112e-05	0.222222
d__Eukaryota	k__Fungi	p__Ascomycota	c__Dothideomycetes	o__Capnodiales	f__Cladosporiaceae	g__Cladosporium	s__Cladosporium_delicatulum	OTU1528	1290	0.00460583	1
d__Eukaryota	k__Fungi	p__Ascomycota	c__Eurotiomycetes	o__Chaetothyriales	f__Herpotrichiellaceae	g__Exophiala	s__unclassified_g__Exophiala	OTU282	1	3.57041e-06	0.111111
d__Eukaryota	k__Fungi	p__Ascomycota	c__Dothideomycetes	o__Pleosporales	f__Pleosporales_fam_Incertae_sedis	g__Dokmaia	s__Dokmaia_sp	OTU1586	4	1.42816e-05	0.111111
d__Eukaryota	k__Fungi	p__Ascomycota	c__Sordariomycetes	o__Hypocreales	f__Nectriaceae	g__Neocosmospora	s__Neocosmospora_rubicola	OTU1507	85	0.000303485	0.222222
d__Eukaryota	k__Fungi	p__Ascomycota	c__Leotiomycetes	o__Helotiales	f__Helotiaceae	g__Scytalidium	s__Scytalidium_circinatum	OTU126	240	0.000856898	0.333333
d__Eukaryota	k__Fungi	p__Basidiomycota	c__Agaricomycetes	o__Trechisporales	f__Hydnodontaceae	g__Trechispora	s__Trechispora_sp	OTU1816	2	7.14082e-06	0.111111
d__Eukaryota	k__Fungi	p__Basidiomycota	c__Microbotryomycetes	o__Sporidiobolales	f__Sporidiobolaceae	g__Rhodotorula	s__Rhodotorula_paludigena	OTU604	4	1.42816e-05	0.111111
d__Eukaryota	k__Fungi	p__Ascomycota	c__Sordariomycetes	o__Chaetosphaeriales	f__Chaetosphaeriaceae	g__Gonytrichum	s__Gonytrichum_macrocladum_var._terricola	OTU929	30	0.000107112	0.111111
d__Eukaryota	k__Fungi	p__Ascomycota	c__Sordariomycetes	o__Xylariales	f__Xylariaceae	g__Daldinia	s__Daldinia_eschscholtzii	OTU952	2	7.14082e-06	0.111111
d__Eukaryota	k__Fungi	p__Ascomycota	c__Dothideomycetes	o__Pleosporales	f__Phaeosphaeriaceae	g__Setophoma	s__unclassified_g__Setophoma	OTU986	66	0.000235647	0.444444
d__Eukaryota	k__Fungi	p__Ascomycota	c__Sordariomycetes	o__Hypocreales	f__Bionectriaceae	g__Gliomastix	s__Gliomastix_murorum	OTU1227	40	0.000142816	0.111111
d__Eukaryota	k__Fungi	p__Ascomycota	c__Dothideomycetes	o__Pleosporales	f__Didymosphaeriaceae	g__Spegazzinia	s__Spegazzinia_sp	OTU962	3	1.07112e-05	0.111111
d__Eukaryota	k__Fungi	p__Ascomycota	c__Sordariomycetes	o__Sordariales	f__Lasiosphaeriaceae	g__Cercophora	s__Cercophora_mirabilis	OTU1314	5	1.7852e-05	0.111111
d__Eukaryota	k__Fungi	p__Ascomycota	c__Sordariomycetes	o__Conioscyphales	f__unclassified_o__Conioscyphales	g__unclassified_o__Conioscyphales	s__unclassified_o__Conioscyphales	OTU1396	5	1.7852e-05	0.111111
d__Eukaryota	k__Fungi	p__Ascomycota	c__Sordariomycetes	o__Xylariales	f__Xylariaceae	g__unclassified_f__Xylariaceae	s__unclassified_f__Xylariaceae	OTU803	2	7.14082e-06	0.111111
d__Eukaryota	k__Fungi	p__Ascomycota	c__Eurotiomycetes	o__Chaetothyriales	f__Herpotrichiellaceae	g__Cladophialophora	s__Cladophialophora_sp	OTU1057	193	0.000689089	0.222222
d__Eukaryota	k__Fungi	p__Ascomycota	c__Sordariomycetes	o__unclassified_c__Sordariomycetes	f__unclassified_c__Sordariomycetes	g__unclassified_c__Sordariomycetes	s__unclassified_c__Sordariomycetes	OTU1010	2	7.14082e-06	0.111111
d__Eukaryota	k__Fungi	p__Ascomycota	c__Sordariomycetes	o__Xylariales	f__Apiosporaceae	g__Arthrinium	s__Arthrinium_rasikravindrae	OTU622	114	0.000407027	0.555556
d__Eukaryota	k__Fungi	p__Ascomycota	c__Sordariomycetes	o__Hypocreales	f__unclassified_o__Hypocreales	g__unclassified_o__Hypocreales	s__unclassified_o__Hypocreales	OTU1174	5	1.7852e-05	0.111111
d__Eukaryota	k__Fungi	p__Basidiomycota	c__Cystobasidiomycetes	o__Erythrobasidiales	f__Erythrobasidiaceae	g__Bannoa	s__Bannoa_sp	OTU517	3	1.07112e-05	0.111111
d__Eukaryota	k__Fungi	p__Ascomycota	c__Sordariomycetes	o__Diaporthales	f__unclassified_o__Diaporthales	g__unclassified_o__Diaporthales	s__unclassified_o__Diaporthales	OTU600	227	0.000810483	0.444444
d__Eukaryota	k__Fungi	p__Ascomycota	c__Dothideomycetes	o__Pleosporales	f__unclassified_o__Pleosporales	g__unclassified_o__Pleosporales	s__unclassified_o__Pleosporales	OTU114	103	0.000367752	0.333333
d__Eukaryota	k__Fungi	p__Ascomycota	c__Dothideomycetes	o__Capnodiales	f__Mycosphaerellaceae	g__Cercospora	s__unclassified_g__Cercospora	OTU1510	54614	0.194994	0.666667
d__Eukaryota	k__Fungi	p__Ascomycota	c__Lecanoromycetes	o__Peltigerales	f__Pannariaceae	g__Degelia	s__Degelia_sp	OTU1221	4	1.42816e-05	0.111111
d__Eukaryota	k__Fungi	p__Ascomycota	c__Dothideomycetes	o__Pleosporales	f__unclassified_o__Pleosporales	g__unclassified_o__Pleosporales	s__unclassified_o__Pleosporales	OTU119	20	7.14082e-05	0.333333
d__Eukaryota	k__Fungi	p__Ascomycota	c__Sordariomycetes	o__Xylariales	f__Xylariaceae	g__Hypoxylon	s__Hypoxylon_commutatum	OTU1369	6	2.14225e-05	0.111111
d__Eukaryota	k__Fungi	p__Basidiomycota	c__Agaricomycetes	o__Agaricales	f__Cystostereaceae	g__unclassified_f__Cystostereaceae	s__unclassified_f__Cystostereaceae	OTU1351	5	1.7852e-05	0.111111
d__Eukaryota	k__Fungi	p__Ascomycota	c__Sordariomycetes	o__Xylariales	f__unclassified_o__Xylariales	g__unclassified_o__Xylariales	s__unclassified_o__Xylariales	OTU1103	14	4.99857e-05	0.222222
d__Eukaryota	k__Fungi	p__Ascomycota	c__Arthoniomycetes	o__Arthoniales	f__Arthoniaceae	g__Arthothelium	s__Arthothelium_spectabile	OTU841	1	3.57041e-06	0.111111
d__Eukaryota	k__Fungi	p__Basidiomycota	c__Agaricomycetes	o__Boletales	f__Boletaceae	g__Boletus	s__Boletus_monilifer	OTU1070	9	3.21337e-05	0.111111
d__Eukaryota	k__Fungi	p__Ascomycota	c__Dothideomycetes	o__Pleosporales	f__Melanommataceae	g__Trematophoma	s__Trematophoma_sp	OTU1473	7	2.49929e-05	0.111111
d__Eukaryota	k__Fungi	p__Ascomycota	c__Sordariomycetes	o__Sordariales	f__Chaetomiaceae	g__Thielavia	s__Thielavia_terricola	OTU1929	2	7.14082e-06	0.111111
d__Eukaryota	k__Fungi	p__Ascomycota	c__Sordariomycetes	o__Diaporthales	f__unclassified_o__Diaporthales	g__unclassified_o__Diaporthales	s__unclassified_o__Diaporthales	OTU1077	15	5.35561e-05	0.222222
d__Eukaryota	k__Fungi	p__Ascomycota	c__Leotiomycetes	o__Helotiales	f__Dermateaceae	g__Trimmatostroma	s__Trimmatostroma_cordae	OTU1171	4	1.42816e-05	0.111111
d__Eukaryota	k__Fungi	p__Ascomycota	c__Leotiomycetes	o__Helotiales	f__Dermateaceae	g__unclassified_f__Dermateaceae	s__unclassified_f__Dermateaceae	OTU893	71	0.000253499	0.111111
d__Eukaryota	k__Fungi	p__Ascomycota	c__Sordariomycetes	o__Diaporthales	f__Diaporthaceae	g__Diaporthe	s__unclassified_g__Diaporthe	OTU1012	3	1.07112e-05	0.111111
d__Eukaryota	k__Fungi	p__Ascomycota	c__Sordariomycetes	o__Diaporthales	f__Diaporthaceae	g__Diaporthe	s__unclassified_g__Diaporthe	OTU1013	165	0.000589117	0.333333
d__Eukaryota	k__Fungi	p__Ascomycota	c__Dothideomycetes	o__Pleosporales	f__Pleosporales_fam_Incertae_sedis	g__Neomassarina	s__Neomassarina_sp	OTU1107	186	0.000664096	0.222222
d__Eukaryota	k__Fungi	p__Ascomycota	c__Eurotiomycetes	o__Eurotiales	f__Aspergillaceae	g__Penicillium	s__Penicillium_spinulosum	OTU1247	10	3.57041e-05	0.111111
d__Eukaryota	k__Fungi	p__Ascomycota	c__Saccharomycetes	o__Saccharomycetales	f__unclassified_o__Saccharomycetales	g__unclassified_o__Saccharomycetales	s__unclassified_o__Saccharomycetales	OTU1505	10	3.57041e-05	0.111111
d__Eukaryota	k__Fungi	p__Ascomycota	c__Sordariomycetes	o__Hypocreales	f__Hypocreaceae	g__Trichoderma	s__Trichoderma_longibrachiatum	OTU1020	2	7.14082e-06	0.222222
d__Eukaryota	k__Fungi	p__Ascomycota	c__Dothideomycetes	o__Mytilinidales	f__Gloniaceae	g__Cenococcum	s__Cenococcum_geophilum	OTU1282	4	1.42816e-05	0.111111
d__Eukaryota	k__Fungi	p__Ascomycota	c__Leotiomycetes	o__Helotiales	f__unclassified_o__Helotiales	g__unclassified_o__Helotiales	s__unclassified_o__Helotiales	OTU1164	63	0.000224936	0.333333
d__Eukaryota	k__Fungi	p__Ascomycota	c__Sordariomycetes	o__unclassified_c__Sordariomycetes	f__unclassified_c__Sordariomycetes	g__unclassified_c__Sordariomycetes	s__unclassified_c__Sordariomycetes	OTU917	19	6.78378e-05	0.111111
d__Eukaryota	k__Fungi	p__Ascomycota	c__Orbiliomycetes	o__Orbiliales	f__Orbiliaceae	g__unclassified_f__Orbiliaceae	s__unclassified_f__Orbiliaceae	OTU1124	9	3.21337e-05	0.222222
d__Eukaryota	k__Fungi	p__Ascomycota	c__Eurotiomycetes	o__Chaetothyriales	f__Herpotrichiellaceae	g__unclassified_f__Herpotrichiellaceae	s__unclassified_f__Herpotrichiellaceae	OTU1406	2	7.14082e-06	0.111111
d__Eukaryota	k__Fungi	p__Ascomycota	c__Leotiomycetes	o__Helotiales	f__Helotiales_fam_Incertae_sedis	g__Cadophora	s__Cadophora_orchidicola	OTU914	34	0.000121394	0.111111
d__Eukaryota	k__Fungi	p__Mortierellomycota	c__Mortierellomycetes	o__Mortierellales	f__Mortierellaceae	g__Mortierella	s__unclassified_g__Mortierella	OTU849	61	0.000217795	0.111111
d__Eukaryota	k__Fungi	p__Ascomycota	c__Dothideomycetes	o__Capnodiales	f__Cladosporiaceae	g__Cladosporium	s__Cladosporium_fusiforme	OTU1321	2	7.14082e-06	0.111111
d__Eukaryota	k__Fungi	p__Ascomycota	c__Saccharomycetes	o__Saccharomycetales	f__Debaryomycetaceae	g__Debaryomyces	s__unclassified_g__Debaryomyces	OTU1587	7	2.49929e-05	0.111111
d__Eukaryota	k__Fungi	p__Basidiomycota	c__Agaricomycetes	o__unclassified_c__Agaricomycetes	f__unclassified_c__Agaricomycetes	g__unclassified_c__Agaricomycetes	s__unclassified_c__Agaricomycetes	OTU1310	149	0.000531991	0.111111
d__Eukaryota	k__Fungi	p__Ascomycota	c__Eurotiomycetes	o__Chaetothyriales	f__Herpotrichiellaceae	g__unclassified_f__Herpotrichiellaceae	s__unclassified_f__Herpotrichiellaceae	OTU1088	7	2.49929e-05	0.111111
d__Eukaryota	k__Fungi	p__Ascomycota	c__Dothideomycetes	o__Capnodiales	f__Teratosphaeriaceae	g__Devriesia	s__Devriesia_strelitziicola	OTU1439	2	7.14082e-06	0.111111
d__Eukaryota	k__Fungi	p__Ascomycota	c__Sordariomycetes	o__Xylariales	f__Xylariaceae	g__unclassified_f__Xylariaceae	s__unclassified_f__Xylariaceae	OTU783	7	2.49929e-05	0.111111
d__Eukaryota	k__Fungi	p__Basidiomycota	c__Agaricomycetes	o__Agaricales	f__Strophariaceae	g__Melanotus	s__unclassified_g__Melanotus	OTU1050	12	4.28449e-05	0.111111
d__Eukaryota	k__Fungi	p__Ascomycota	c__unclassified_p__Ascomycota	o__unclassified_p__Ascomycota	f__unclassified_p__Ascomycota	g__unclassified_p__Ascomycota	s__unclassified_p__Ascomycota	OTU1072	6	2.14225e-05	0.111111
d__Eukaryota	k__Fungi	p__Ascomycota	c__Eurotiomycetes	o__Chaetothyriales	f__Herpotrichiellaceae	g__Exophiala	s__Exophiala_lecanii-corni	OTU57	26	9.28306e-05	0.111111
d__Eukaryota	k__Fungi	p__Ascomycota	c__Dothideomycetes	o__Pleosporales	f__Didymosphaeriaceae	g__Pseudopithomyces	s__Pseudopithomyces_chartarum	OTU2100	63	0.000224936	0.444444
d__Eukaryota	k__Fungi	p__Ascomycota	c__Sordariomycetes	o__Boliniales	f__Boliniales_fam_Incertae_sedis	g__Paramicrothyrium	s__Paramicrothyrium_sp	OTU1526	3	1.07112e-05	0.111111
d__Eukaryota	k__Fungi	p__Ascomycota	c__Eurotiomycetes	o__Chaetothyriales	f__Herpotrichiellaceae	g__Cladophialophora	s__Cladophialophora_sp	OTU1126	3616	0.0129106	0.333333
d__Eukaryota	k__Fungi	p__Basidiomycota	c__Agaricomycetes	o__Agaricales	f__Psathyrellaceae	g__Psathyrella	s__Psathyrella_candolleana	OTU307	1	3.57041e-06	0.111111
d__Eukaryota	k__Fungi	p__Ascomycota	c__Sordariomycetes	o__Xylariales	f__unclassified_o__Xylariales	g__unclassified_o__Xylariales	s__unclassified_o__Xylariales	OTU774	9	3.21337e-05	0.222222
d__Eukaryota	k__Fungi	p__Basidiomycota	c__Agaricomycetes	o__Agaricales	f__Tricholomataceae	g__Calyptella	s__Calyptella_sp	OTU845	13	4.64153e-05	0.111111
d__Eukaryota	k__Fungi	p__Ascomycota	c__Dothideomycetes	o__Pleosporales	f__Phaeosphaeriaceae	g__unclassified_f__Phaeosphaeriaceae	s__unclassified_f__Phaeosphaeriaceae	OTU1342	16	5.71265e-05	0.111111
d__Eukaryota	k__Fungi	p__Ascomycota	c__Dothideomycetes	o__Pleosporales	f__Periconiaceae	g__Periconia	s__unclassified_g__Periconia	OTU1089	7	2.49929e-05	0.111111
d__Eukaryota	k__Fungi	p__Basidiomycota	c__Agaricomycetes	o__unclassified_c__Agaricomycetes	f__unclassified_c__Agaricomycetes	g__unclassified_c__Agaricomycetes	s__unclassified_c__Agaricomycetes	OTU1067	1	3.57041e-06	0.111111
d__Eukaryota	k__Fungi	p__Ascomycota	c__unclassified_p__Ascomycota	o__unclassified_p__Ascomycota	f__unclassified_p__Ascomycota	g__unclassified_p__Ascomycota	s__unclassified_p__Ascomycota	OTU1215	22	7.8549e-05	0.111111
d__Eukaryota	k__Fungi	p__Basidiomycota	c__Agaricomycetes	o__Agaricales	f__Psathyrellaceae	g__Coprinellus	s__Coprinellus_disseminatus	OTU1373	2	7.14082e-06	0.111111
d__Eukaryota	k__Fungi	p__Basidiomycota	c__Agaricomycetes	o__Hymenochaetales	f__Hymenochaetaceae	g__Phellinus	s__Phellinus_arctostaphyli	OTU1034	1	3.57041e-06	0.111111
d__Eukaryota	k__Fungi	p__Ascomycota	c__Sordariomycetes	o__Hypocreales	f__Nectriaceae	g__Gliocladiopsis	s__unclassified_g__Gliocladiopsis	OTU931	139	0.000496287	0.222222
d__Eukaryota	k__Fungi	p__Ascomycota	c__Sordariomycetes	o__Diaporthales	f__Diaporthaceae	g__Diaporthe	s__unclassified_g__Diaporthe	OTU1025	136	0.000485576	0.222222
d__Eukaryota	k__Fungi	p__unclassified_k__Fungi	c__unclassified_k__Fungi	o__unclassified_k__Fungi	f__unclassified_k__Fungi	g__unclassified_k__Fungi	s__unclassified_k__Fungi	OTU1362	12	4.28449e-05	0.222222
d__Eukaryota	k__Fungi	p__Ascomycota	c__Saccharomycetes	o__Saccharomycetales	f__Phaffomycetaceae	g__Cyberlindnera	s__Cyberlindnera_sp	OTU881	7	2.49929e-05	0.111111
d__Eukaryota	k__Fungi	p__Basidiomycota	c__Tremellomycetes	o__Tremellales	f__unclassified_o__Tremellales	g__unclassified_o__Tremellales	s__unclassified_o__Tremellales	OTU1456	8	2.85633e-05	0.111111
d__Eukaryota	k__Fungi	p__Ascomycota	c__Eurotiomycetes	o__Chaetothyriales	f__unclassified_o__Chaetothyriales	g__unclassified_o__Chaetothyriales	s__unclassified_o__Chaetothyriales	OTU1219	13	4.64153e-05	0.222222
d__Eukaryota	k__Fungi	p__Ascomycota	c__Dothideomycetes	o__Pleosporales	f__Leptosphaeriaceae	g__Subplenodomus	s__Subplenodomus_iridicola	OTU1234	3	1.07112e-05	0.111111
d__Eukaryota	k__Fungi	p__Ascomycota	c__Sordariomycetes	o__Xylariales	f__unclassified_o__Xylariales	g__unclassified_o__Xylariales	s__unclassified_o__Xylariales	OTU1484	74	0.00026421	0.333333
d__Eukaryota	k__Fungi	p__Ascomycota	c__Dothideomycetes	o__Pleosporales	f__Leptosphaeriaceae	g__Leptosphaeria	s__Leptosphaeria_modesta	OTU992	2	7.14082e-06	0.222222
d__Eukaryota	k__Fungi	p__Ascomycota	c__Sordariomycetes	o__Xylariales	f__Xylariaceae	g__Hypoxylon	s__Hypoxylon_anthochroum	OTU815	1	3.57041e-06	0.111111
d__Eukaryota	k__Fungi	p__Ascomycota	c__Sordariomycetes	o__Xylariales	f__Xylariaceae	g__Hypoxylon	s__Hypoxylon_neosublenormandii	OTU968	13	4.64153e-05	0.333333
d__Eukaryota	k__Fungi	p__Ascomycota	c__Eurotiomycetes	o__Chaetothyriales	f__Trichomeriaceae	g__Trichomerium	s__unclassified_g__Trichomerium	OTU1361	36	0.000128535	0.333333
d__Eukaryota	k__Fungi	p__unclassified_k__Fungi	c__unclassified_k__Fungi	o__unclassified_k__Fungi	f__unclassified_k__Fungi	g__unclassified_k__Fungi	s__unclassified_k__Fungi	OTU1064	6	2.14225e-05	0.111111
d__Eukaryota	k__Fungi	p__Ascomycota	c__Dothideomycetes	o__Botryosphaeriales	f__Botryosphaeriaceae	g__Neodeightonia	s__Neodeightonia_subglobosa	OTU444	25	8.92602e-05	0.444444
d__Eukaryota	k__Fungi	p__Basidiomycota	c__Agaricomycetes	o__Polyporales	f__Ganodermataceae	g__Ganoderma	s__Ganoderma_multiplicatum	OTU947	16	5.71265e-05	0.333333
d__Eukaryota	k__Fungi	p__Ascomycota	c__Sordariomycetes	o__unclassified_c__Sordariomycetes	f__unclassified_c__Sordariomycetes	g__unclassified_c__Sordariomycetes	s__unclassified_c__Sordariomycetes	OTU1243	4	1.42816e-05	0.111111
d__Eukaryota	k__Fungi	p__Ascomycota	c__Dothideomycetes	o__Pleosporales	f__Didymosphaeriaceae	g__Pseudopithomyces	s__Pseudopithomyces_maydicus	OTU1315	17	6.06969e-05	0.111111
d__Eukaryota	k__Fungi	p__Ascomycota	c__Dothideomycetes	o__Pleosporales	f__Lophiotremataceae	g__Lophiotrema	s__Lophiotrema_rubi	OTU1346	1	3.57041e-06	0.111111
d__Eukaryota	k__Fungi	p__Ascomycota	c__Sordariomycetes	o__Diaporthales	f__unclassified_o__Diaporthales	g__unclassified_o__Diaporthales	s__unclassified_o__Diaporthales	OTU802	1296	0.00462725	0.666667
d__Eukaryota	k__Fungi	p__Chytridiomycota	c__unclassified_p__Chytridiomycota	o__unclassified_p__Chytridiomycota	f__unclassified_p__Chytridiomycota	g__unclassified_p__Chytridiomycota	s__unclassified_p__Chytridiomycota	OTU866	2	7.14082e-06	0.111111
d__Eukaryota	k__Fungi	p__Ascomycota	c__Dothideomycetes	o__Pleosporales	f__Phaeosphaeriaceae	g__Leptospora	s__Leptospora_rubella	OTU1949	24	8.56898e-05	0.555556
d__Eukaryota	k__Fungi	p__Ascomycota	c__Sordariomycetes	o__Hypocreales	f__Nectriaceae	g__Haematonectria	s__Haematonectria_sp	OTU1138	3	1.07112e-05	0.111111
d__Eukaryota	k__Fungi	p__Ascomycota	c__Eurotiomycetes	o__Chaetothyriales	f__unclassified_o__Chaetothyriales	g__unclassified_o__Chaetothyriales	s__unclassified_o__Chaetothyriales	OTU1142	299	0.00106755	0.333333
d__Eukaryota	k__Fungi	p__Ascomycota	c__Dothideomycetes	o__Pleosporales	f__unclassified_o__Pleosporales	g__unclassified_o__Pleosporales	s__unclassified_o__Pleosporales	OTU102	583	0.00208155	0.333333
d__Eukaryota	k__Fungi	p__Ascomycota	c__Dothideomycetes	o__Pleosporales	f__Didymosphaeriaceae	g__Montagnula	s__unclassified_g__Montagnula	OTU2043	34	0.000121394	0.333333
d__Eukaryota	k__Fungi	p__Basidiomycota	c__Pucciniomycetes	o__Platygloeales	f__unclassified_o__Platygloeales	g__unclassified_o__Platygloeales	s__unclassified_o__Platygloeales	OTU1061	1	3.57041e-06	0.111111
d__Eukaryota	k__Fungi	p__Ascomycota	c__Sordariomycetes	o__Xylariales	f__Xylariaceae	g__unclassified_f__Xylariaceae	s__unclassified_f__Xylariaceae	OTU1092	1	3.57041e-06	0.111111
d__Eukaryota	k__Fungi	p__Ascomycota	c__Sordariomycetes	o__Xylariales	f__unclassified_o__Xylariales	g__unclassified_o__Xylariales	s__unclassified_o__Xylariales	OTU1325	17	6.06969e-05	0.111111
d__Eukaryota	k__Fungi	p__Basidiomycota	c__unclassified_p__Basidiomycota	o__unclassified_p__Basidiomycota	f__unclassified_p__Basidiomycota	g__unclassified_p__Basidiomycota	s__unclassified_p__Basidiomycota	OTU1358	8	2.85633e-05	0.111111
d__Eukaryota	k__Fungi	p__Ascomycota	c__Sordariomycetes	o__Xylariales	f__Xylariaceae	g__Annulohypoxylon	s__unclassified_g__Annulohypoxylon	OTU1413	3	1.07112e-05	0.111111
d__Eukaryota	k__Fungi	p__Ascomycota	c__Sordariomycetes	o__Hypocreales	f__unclassified_o__Hypocreales	g__unclassified_o__Hypocreales	s__unclassified_o__Hypocreales	OTU1224	13	4.64153e-05	0.111111
d__Eukaryota	k__Fungi	p__Ascomycota	c__Sordariomycetes	o__Xylariales	f__Microdochiaceae	g__Microdochium	s__Microdochium_colombiense	OTU1947	1	3.57041e-06	0.111111
d__Eukaryota	k__Fungi	p__Ascomycota	c__Eurotiomycetes	o__Chaetothyriales	f__Herpotrichiellaceae	g__Cladophialophora	s__unclassified_g__Cladophialophora	OTU1175	3	1.07112e-05	0.111111
d__Eukaryota	k__Fungi	p__Basidiomycota	c__Microbotryomycetes	o__Microbotryomycetes_ord_Incertae_sedis	f__Microbotryomycetes_fam_Incertae_sedis	g__Colacogloea	s__Colacogloea_sp	OTU1095	3	1.07112e-05	0.111111
d__Eukaryota	k__Fungi	p__Basidiomycota	c__Agaricomycetes	o__unclassified_c__Agaricomycetes	f__unclassified_c__Agaricomycetes	g__unclassified_c__Agaricomycetes	s__unclassified_c__Agaricomycetes	OTU906	234	0.000835476	0.222222
d__Eukaryota	k__Fungi	p__Basidiomycota	c__Agaricomycetes	o__Trechisporales	f__Hydnodontaceae	g__Trechispora	s__unclassified_g__Trechispora	OTU1037	4	1.42816e-05	0.111111
d__Eukaryota	k__Fungi	p__Ascomycota	c__Sordariomycetes	o__Hypocreales	f__Bionectriaceae	g__Ijuhya	s__Ijuhya_sp	OTU1231	11	3.92745e-05	0.111111
d__Eukaryota	k__Fungi	p__Ascomycota	c__Dothideomycetes	o__Pleosporales	f__Pleosporaceae	g__Alternaria	s__Alternaria_macrospora	OTU84	2	7.14082e-06	0.111111
d__Eukaryota	k__Fungi	p__Basidiomycota	c__Agaricostilbomycetes	o__Agaricostilbales	f__Chionosphaeraceae	g__unclassified_f__Chionosphaeraceae	s__unclassified_f__Chionosphaeraceae	OTU1319	6	2.14225e-05	0.111111
d__Eukaryota	k__Fungi	p__Ascomycota	c__Dothideomycetes	o__Pleosporales	f__Didymellaceae	g__Epicoccum	s__Epicoccum_nigrum	OTU1150	77	0.000274921	0.444444
d__Eukaryota	k__Fungi	p__Basidiomycota	c__Cystobasidiomycetes	o__Cystobasidiales	f__Cystobasidiaceae	g__Cystobasidium	s__Cystobasidium_minuta	OTU1660	27	9.6401e-05	0.222222
d__Eukaryota	k__Fungi	p__Ascomycota	c__Dothideomycetes	o__Capnodiales	f__unclassified_o__Capnodiales	g__unclassified_o__Capnodiales	s__unclassified_o__Capnodiales	OTU955	54	0.000192802	0.333333
d__Eukaryota	k__Fungi	p__Ascomycota	c__Dothideomycetes	o__Pleosporales	f__Phaeosphaeriaceae	g__unclassified_f__Phaeosphaeriaceae	s__unclassified_f__Phaeosphaeriaceae	OTU1217	2	7.14082e-06	0.111111
d__Eukaryota	k__Fungi	p__Ascomycota	c__unclassified_p__Ascomycota	o__unclassified_p__Ascomycota	f__unclassified_p__Ascomycota	g__unclassified_p__Ascomycota	s__unclassified_p__Ascomycota	OTU1060	126	0.000449871	0.555556
d__Eukaryota	k__Fungi	p__Ascomycota	c__Leotiomycetes	o__Helotiales	f__Helotiaceae	g__Tetracladium	s__unclassified_g__Tetracladium	OTU1022	255	0.000910454	0.222222
d__Eukaryota	k__Fungi	p__Ascomycota	c__Dothideomycetes	o__Capnodiales	f__Mycosphaerellaceae	g__unclassified_f__Mycosphaerellaceae	s__unclassified_f__Mycosphaerellaceae	OTU795	6	2.14225e-05	0.222222
d__Eukaryota	k__Fungi	p__Ascomycota	c__Sordariomycetes	o__Hypocreales	f__Hypocreaceae	g__Trichoderma	s__unclassified_g__Trichoderma	OTU850	30	0.000107112	0.111111
d__Eukaryota	k__Fungi	p__Ascomycota	c__Dothideomycetes	o__Pleosporales	f__Lophiostomataceae	g__Lophiostoma	s__Lophiostoma_macrostomum	OTU2001	9	3.21337e-05	0.111111
d__Eukaryota	k__Fungi	p__Ascomycota	c__Dothideomycetes	o__Pleosporales	f__Montagnulaceae	g__unclassified_f__Montagnulaceae	s__Montagnulaceae_sp	OTU1136	1	3.57041e-06	0.111111
d__Eukaryota	k__Fungi	p__Ascomycota	c__Leotiomycetes	o__Helotiales	f__unclassified_o__Helotiales	g__unclassified_o__Helotiales	s__unclassified_o__Helotiales	OTU1023	2	7.14082e-06	0.111111
d__Eukaryota	k__Fungi	p__Ascomycota	c__Eurotiomycetes	o__Chaetothyriales	f__Herpotrichiellaceae	g__Cladophialophora	s__Cladophialophora_sp	OTU1260	4	1.42816e-05	0.111111
d__Eukaryota	k__Fungi	p__Ascomycota	c__Eurotiomycetes	o__Chaetothyriales	f__Herpotrichiellaceae	g__Cladophialophora	s__Cladophialophora_sp	OTU209	5	1.7852e-05	0.111111
d__Eukaryota	k__Fungi	p__Ascomycota	c__Sordariomycetes	o__Hypocreales	f__Nectriaceae	g__Ilyonectria	s__Ilyonectria_crassa	OTU932	5679	0.0202763	0.444444
d__Eukaryota	k__Fungi	p__Chytridiomycota	c__unclassified_p__Chytridiomycota	o__unclassified_p__Chytridiomycota	f__unclassified_p__Chytridiomycota	g__unclassified_p__Chytridiomycota	s__unclassified_p__Chytridiomycota	OTU867	2	7.14082e-06	0.111111
d__Eukaryota	k__Fungi	p__Ascomycota	c__Eurotiomycetes	o__Chaetothyriales	f__Cyphellophoraceae	g__Cyphellophora	s__Cyphellophora_europaea	OTU1139	15	5.35561e-05	0.222222
d__Eukaryota	k__Fungi	p__Ascomycota	c__Sordariomycetes	o__Hypocreales	f__Bionectriaceae	g__Clonostachys	s__Clonostachys_epichloe	OTU1903	3	1.07112e-05	0.111111
d__Eukaryota	k__Fungi	p__Ascomycota	c__unclassified_p__Ascomycota	o__unclassified_p__Ascomycota	f__unclassified_p__Ascomycota	g__unclassified_p__Ascomycota	s__unclassified_p__Ascomycota	OTU413	1	3.57041e-06	0.111111
d__Eukaryota	k__Fungi	p__Ascomycota	c__Dothideomycetes	o__Pleosporales	f__Periconiaceae	g__Periconia	s__unclassified_g__Periconia	OTU958	1	3.57041e-06	0.111111
d__Eukaryota	k__Fungi	p__Ascomycota	c__Eurotiomycetes	o__Chaetothyriales	f__Herpotrichiellaceae	g__Cladophialophora	s__Cladophialophora_sp	OTU1192	8	2.85633e-05	0.111111
d__Eukaryota	k__Fungi	p__Ascomycota	c__Sordariomycetes	o__Boliniales	f__Boliniales_fam_Incertae_sedis	g__Paramicrothyrium	s__Paramicrothyrium_sp	OTU1937	3	1.07112e-05	0.111111
d__Eukaryota	k__Fungi	p__unclassified_k__Fungi	c__unclassified_k__Fungi	o__unclassified_k__Fungi	f__unclassified_k__Fungi	g__unclassified_k__Fungi	s__unclassified_k__Fungi	OTU1313	1	3.57041e-06	0.111111
d__Eukaryota	k__Fungi	p__Ascomycota	c__unclassified_p__Ascomycota	o__unclassified_p__Ascomycota	f__unclassified_p__Ascomycota	g__unclassified_p__Ascomycota	s__unclassified_p__Ascomycota	OTU1448	2	7.14082e-06	0.111111
d__Eukaryota	k__Fungi	p__Ascomycota	c__Sordariomycetes	o__Glomerellales	f__Glomerellaceae	g__Colletotrichum	s__Colletotrichum_boninense	OTU657	533	0.00190303	0.666667
d__Eukaryota	k__Fungi	p__Ascomycota	c__unclassified_p__Ascomycota	o__unclassified_p__Ascomycota	f__unclassified_p__Ascomycota	g__unclassified_p__Ascomycota	s__unclassified_p__Ascomycota	OTU1443	2	7.14082e-06	0.111111
d__Eukaryota	k__Fungi	p__Basidiomycota	c__Agaricomycetes	o__Trechisporales	f__Hydnodontaceae	g__Trechispora	s__Trechispora_sp	OTU1258	7	2.49929e-05	0.222222
d__Eukaryota	k__Fungi	p__Ascomycota	c__Dothideomycetes	o__Pleosporales	f__unclassified_o__Pleosporales	g__unclassified_o__Pleosporales	s__unclassified_o__Pleosporales	OTU1257	3	1.07112e-05	0.111111
d__Eukaryota	k__Fungi	p__Ascomycota	c__Dothideomycetes	o__Pleosporales	f__Phaeosphaeriaceae	g__Setophoma	s__Setophoma_vernoniae	OTU351	1	3.57041e-06	0.111111
d__Eukaryota	k__Fungi	p__Ascomycota	c__Eurotiomycetes	o__Chaetothyriales	f__Cyphellophoraceae	g__unclassified_f__Cyphellophoraceae	s__unclassified_f__Cyphellophoraceae	OTU1128	60	0.000214225	0.333333
d__Eukaryota	k__Fungi	p__Basidiomycota	c__Agaricomycetes	o__Agaricales	f__Amanitaceae	g__Amanita	s__Amanita_tenuifolia	OTU872	13	4.64153e-05	0.111111
d__Eukaryota	k__Fungi	p__Ascomycota	c__Dothideomycetes	o__Pleosporales	f__Didymosphaeriaceae	g__Paraconiothyrium	s__Paraconiothyrium_variabile	OTU1897	114	0.000407027	0.222222
d__Eukaryota	k__Fungi	p__Ascomycota	c__Eurotiomycetes	o__Chaetothyriales	f__Herpotrichiellaceae	g__Exophiala	s__Exophiala_cancerae	OTU902	15322	0.0547058	0.666667
d__Eukaryota	k__Fungi	p__Ascomycota	c__Sordariomycetes	o__unclassified_c__Sordariomycetes	f__unclassified_c__Sordariomycetes	g__unclassified_c__Sordariomycetes	s__unclassified_c__Sordariomycetes	OTU1384	17	6.06969e-05	0.111111
d__Eukaryota	k__Fungi	p__Basidiomycota	c__Agaricomycetes	o__Cantharellales	f__Ceratobasidiaceae	g__unclassified_f__Ceratobasidiaceae	s__unclassified_f__Ceratobasidiaceae	OTU989	54	0.000192802	0.333333
d__Eukaryota	k__Fungi	p__Ascomycota	c__Sordariomycetes	o__Sordariales	f__Lasiosphaeriaceae	g__Podospora	s__Podospora_longicaudata	OTU817	1	3.57041e-06	0.111111
d__Eukaryota	k__Fungi	p__Ascomycota	c__unclassified_p__Ascomycota	o__unclassified_p__Ascomycota	f__unclassified_p__Ascomycota	g__unclassified_p__Ascomycota	s__unclassified_p__Ascomycota	OTU935	11	3.92745e-05	0.222222
d__Eukaryota	k__Fungi	p__Basidiomycota	c__Agaricomycetes	o__Agaricales	f__Agaricaceae	g__Micropsalliota	s__unclassified_g__Micropsalliota	OTU1457	1	3.57041e-06	0.111111
d__Eukaryota	k__Fungi	p__Ascomycota	c__Dothideomycetes	o__Pleosporales	f__Pleosporaceae	g__Alternaria	s__Alternaria_longissima	OTU1254	15	5.35561e-05	0.222222
d__Eukaryota	k__Fungi	p__Ascomycota	c__Sordariomycetes	o__Hypocreales	f__Hypocreales_fam_Incertae_sedis	g__Acremonium	s__Acremonium_collariferum	OTU481	10	3.57041e-05	0.333333
d__Eukaryota	k__Fungi	p__Ascomycota	c__Sordariomycetes	o__Diaporthales	f__Diaporthaceae	g__Diaporthe	s__unclassified_g__Diaporthe	OTU1035	15	5.35561e-05	0.111111
d__Eukaryota	k__Fungi	p__Ascomycota	c__Eurotiomycetes	o__Eurotiales	f__Aspergillaceae	g__Penicillium	s__Penicillium_citrinum	OTU1581	6	2.14225e-05	0.111111
d__Eukaryota	k__Fungi	p__Ascomycota	c__Sordariomycetes	o__Diaporthales	f__Diaporthaceae	g__Diaporthe	s__unclassified_g__Diaporthe	OTU1032	154	0.000549843	0.222222
d__Eukaryota	k__Fungi	p__Ascomycota	c__Dothideomycetes	o__Pleosporales	f__Didymellaceae	g__Phoma	s__Phoma_adonidicola	OTU1694	106	0.000378463	0.555556
d__Eukaryota	k__Fungi	p__Ascomycota	c__Dothideomycetes	o__Capnodiales	f__unclassified_o__Capnodiales	g__unclassified_o__Capnodiales	s__unclassified_o__Capnodiales	OTU1099	6	2.14225e-05	0.111111
d__Eukaryota	k__Fungi	p__Ascomycota	c__Sordariomycetes	o__Xylariales	f__Xylariaceae	g__Hypoxylon	s__Hypoxylon_notatum	OTU984	6	2.14225e-05	0.111111
d__Eukaryota	k__Fungi	p__unclassified_k__Fungi	c__unclassified_k__Fungi	o__unclassified_k__Fungi	f__unclassified_k__Fungi	g__unclassified_k__Fungi	s__unclassified_k__Fungi	OTU651	32	0.000114253	0.888889
d__Eukaryota	k__Fungi	p__Ascomycota	c__Sordariomycetes	o__unclassified_c__Sordariomycetes	f__unclassified_c__Sordariomycetes	g__unclassified_c__Sordariomycetes	s__unclassified_c__Sordariomycetes	OTU112	1	3.57041e-06	0.111111
d__Eukaryota	k__Fungi	p__Ascomycota	c__Sordariomycetes	o__unclassified_c__Sordariomycetes	f__unclassified_c__Sordariomycetes	g__unclassified_c__Sordariomycetes	s__unclassified_c__Sordariomycetes	OTU111	27	9.6401e-05	0.333333
d__Eukaryota	k__Fungi	p__Ascomycota	c__Eurotiomycetes	o__Chaetothyriales	f__Trichomeriaceae	g__Knufia	s__Knufia_sp	OTU226	1	3.57041e-06	0.111111
d__Eukaryota	k__Fungi	p__Ascomycota	c__Eurotiomycetes	o__Chaetothyriales	f__Herpotrichiellaceae	g__unclassified_f__Herpotrichiellaceae	s__unclassified_f__Herpotrichiellaceae	OTU1255	34	0.000121394	0.222222
d__Eukaryota	k__Fungi	p__Ascomycota	c__Dothideomycetes	o__Capnodiales	f__Mycosphaerellaceae	g__Pallidocercospora	s__Pallidocercospora_crystallina	OTU797	70	0.000249929	0.222222
d__Eukaryota	k__Fungi	p__Ascomycota	c__Dothideomycetes	o__Pleosporales	f__Didymellaceae	g__unclassified_f__Didymellaceae	s__unclassified_f__Didymellaceae	OTU1502	566	0.00202085	0.444444
d__Eukaryota	k__Fungi	p__Ascomycota	c__Dothideomycetes	o__Pleosporales	f__Didymellaceae	g__unclassified_f__Didymellaceae	s__unclassified_f__Didymellaceae	OTU844	20	7.14082e-05	0.222222
d__Eukaryota	k__Fungi	p__Ascomycota	c__Sordariomycetes	o__Xylariales	f__Xylariaceae	g__Hypoxylon	s__Hypoxylon_lividipigmentum	OTU1163	6	2.14225e-05	0.111111
d__Eukaryota	k__Fungi	p__Basidiomycota	c__Agaricomycetes	o__Cantharellales	f__Ceratobasidiaceae	g__unclassified_f__Ceratobasidiaceae	s__unclassified_f__Ceratobasidiaceae	OTU1091	107	0.000382034	0.333333
d__Eukaryota	k__Fungi	p__Ascomycota	c__Dothideomycetes	o__Capnodiales	f__Teratosphaeriaceae	g__Devriesia	s__Devriesia_strelitziicola	OTU1397	3	1.07112e-05	0.111111
d__Eukaryota	k__Fungi	p__Ascomycota	c__Dothideomycetes	o__Venturiales	f__Sympoventuriaceae	g__Ochroconis	s__Ochroconis_mirabilis	OTU2045	13	4.64153e-05	0.333333
d__Eukaryota	k__Fungi	p__Ascomycota	c__Eurotiomycetes	o__Chaetothyriales	f__Cyphellophoraceae	g__Cyphellophora	s__Cyphellophora_oxyspora	OTU1894	116	0.000414167	0.333333
d__Eukaryota	k__Fungi	p__unclassified_k__Fungi	c__unclassified_k__Fungi	o__unclassified_k__Fungi	f__unclassified_k__Fungi	g__unclassified_k__Fungi	s__unclassified_k__Fungi	OTU903	46	0.000164239	0.111111
d__Eukaryota	k__Fungi	p__unclassified_k__Fungi	c__unclassified_k__Fungi	o__unclassified_k__Fungi	f__unclassified_k__Fungi	g__unclassified_k__Fungi	s__unclassified_k__Fungi	OTU907	7	2.49929e-05	0.111111
d__Eukaryota	k__Fungi	p__Ascomycota	c__Sordariomycetes	o__Hypocreales	f__Hypocreaceae	g__Trichoderma	s__unclassified_g__Trichoderma	OTU1093	1	3.57041e-06	0.111111
d__Eukaryota	k__Fungi	p__Ascomycota	c__Leotiomycetes	o__Helotiales	f__Sclerotiniaceae	g__Botrytis	s__unclassified_g__Botrytis	OTU60	28	9.99714e-05	0.333333
d__Eukaryota	k__Fungi	p__Ascomycota	c__unclassified_p__Ascomycota	o__unclassified_p__Ascomycota	f__unclassified_p__Ascomycota	g__unclassified_p__Ascomycota	s__unclassified_p__Ascomycota	OTU1302	4	1.42816e-05	0.111111
d__Eukaryota	k__Fungi	p__Ascomycota	c__unclassified_p__Ascomycota	o__unclassified_p__Ascomycota	f__unclassified_p__Ascomycota	g__unclassified_p__Ascomycota	s__unclassified_p__Ascomycota	OTU1305	2	7.14082e-06	0.222222
d__Eukaryota	k__Fungi	p__Ascomycota	c__Sordariomycetes	o__Xylariales	f__Xylariaceae	g__Daldinia	s__Daldinia_caldariorum	OTU1387	3	1.07112e-05	0.222222
d__Eukaryota	k__Fungi	p__unclassified_k__Fungi	c__unclassified_k__Fungi	o__unclassified_k__Fungi	f__unclassified_k__Fungi	g__unclassified_k__Fungi	s__unclassified_k__Fungi	OTU1895	6	2.14225e-05	0.333333
d__Eukaryota	k__Fungi	p__Ascomycota	c__unclassified_p__Ascomycota	o__unclassified_p__Ascomycota	f__unclassified_p__Ascomycota	g__unclassified_p__Ascomycota	s__unclassified_p__Ascomycota	OTU1273	3	1.07112e-05	0.111111
d__Eukaryota	k__Fungi	p__Ascomycota	c__Sordariomycetes	o__Xylariales	f__Xylariaceae	g__Hypoxylon	s__Hypoxylon_notatum	OTU1198	9	3.21337e-05	0.333333
d__Eukaryota	k__Fungi	p__Basidiomycota	c__Agaricomycetes	o__Polyporales	f__Ganodermataceae	g__Perenniporia	s__Perenniporia_bannaensis	OTU1049	7	2.49929e-05	0.222222
d__Eukaryota	k__Fungi	p__Ascomycota	c__Orbiliomycetes	o__Orbiliales	f__Orbiliaceae	g__unclassified_f__Orbiliaceae	s__unclassified_f__Orbiliaceae	OTU939	461	0.00164596	0.111111
d__Eukaryota	k__Fungi	p__Basidiomycota	c__Agaricomycetes	o__Agaricales	f__Agaricaceae	g__Micropsalliota	s__Micropsalliota_globocystis	OTU1253	3	1.07112e-05	0.111111
d__Eukaryota	k__Fungi	p__Chytridiomycota	c__unclassified_p__Chytridiomycota	o__unclassified_p__Chytridiomycota	f__unclassified_p__Chytridiomycota	g__unclassified_p__Chytridiomycota	s__unclassified_p__Chytridiomycota	OTU870	5	1.7852e-05	0.111111
d__Eukaryota	k__Fungi	p__Ascomycota	c__Eurotiomycetes	o__Eurotiales	f__Aspergillaceae	g__Aspergillus	s__Aspergillus_halophilicus	OTU928	15	5.35561e-05	0.111111
d__Eukaryota	k__Fungi	p__Basidiomycota	c__Microbotryomycetes	o__Microbotryomycetes_ord_Incertae_sedis	f__Chrysozymaceae	g__Slooffia	s__Slooffia_tsugae	OTU309	4	1.42816e-05	0.222222
d__Eukaryota	k__Fungi	p__Ascomycota	c__unclassified_p__Ascomycota	o__unclassified_p__Ascomycota	f__unclassified_p__Ascomycota	g__unclassified_p__Ascomycota	s__unclassified_p__Ascomycota	OTU543	7627	0.0272315	0.666667
d__Eukaryota	k__Fungi	p__Ascomycota	c__unclassified_p__Ascomycota	o__unclassified_p__Ascomycota	f__unclassified_p__Ascomycota	g__unclassified_p__Ascomycota	s__unclassified_p__Ascomycota	OTU1472	11	3.92745e-05	0.111111
d__Eukaryota	k__Fungi	p__Ascomycota	c__Sordariomycetes	o__Conioscyphales	f__unclassified_o__Conioscyphales	g__unclassified_o__Conioscyphales	s__unclassified_o__Conioscyphales	OTU999	7	2.49929e-05	0.111111
d__Eukaryota	k__Fungi	p__Ascomycota	c__Dothideomycetes	o__Pleosporales	f__Didymellaceae	g__Phoma	s__Phoma_adonidicola	OTU158	3	1.07112e-05	0.111111
d__Eukaryota	k__Fungi	p__Basidiomycota	c__Agaricomycetes	o__Agaricales	f__Tricholomataceae	g__Omphalina	s__unclassified_g__Omphalina	OTU1056	17	6.06969e-05	0.111111
d__Eukaryota	k__Fungi	p__Ascomycota	c__Eurotiomycetes	o__Eurotiales	f__Aspergillaceae	g__Aspergillus	s__Aspergillus_penicillioides	OTU843	9	3.21337e-05	0.333333
d__Eukaryota	k__Fungi	p__Ascomycota	c__Eurotiomycetes	o__Chaetothyriales	f__Herpotrichiellaceae	g__Cladophialophora	s__unclassified_g__Cladophialophora	OTU1371	11	3.92745e-05	0.111111
d__Eukaryota	k__Fungi	p__unclassified_k__Fungi	c__unclassified_k__Fungi	o__unclassified_k__Fungi	f__unclassified_k__Fungi	g__unclassified_k__Fungi	s__unclassified_k__Fungi	OTU1414	3	1.07112e-05	0.111111
d__Eukaryota	k__Fungi	p__Ascomycota	c__Sordariomycetes	o__Hypocreales	f__unclassified_o__Hypocreales	g__unclassified_o__Hypocreales	s__unclassified_o__Hypocreales	OTU1444	2	7.14082e-06	0.111111
d__Eukaryota	k__Fungi	p__Ascomycota	c__Sordariomycetes	o__Xylariales	f__Xylariaceae	g__Xylaria	s__Xylaria_grammica	OTU1323	17	6.06969e-05	0.111111
d__Eukaryota	k__Fungi	p__Ascomycota	c__Sordariomycetes	o__Phomatosporales	f__Phomatosporaceae	g__Phomatospora	s__Phomatospora_biseriata	OTU1228	6	2.14225e-05	0.111111
d__Eukaryota	k__Fungi	p__unclassified_k__Fungi	c__unclassified_k__Fungi	o__unclassified_k__Fungi	f__unclassified_k__Fungi	g__unclassified_k__Fungi	s__unclassified_k__Fungi	OTU1098	2	7.14082e-06	0.222222
d__Eukaryota	k__Fungi	p__Ascomycota	c__Sordariomycetes	o__Xylariales	f__Apiosporaceae	g__Arthrinium	s__Arthrinium_marii	OTU1437	1	3.57041e-06	0.111111
d__Eukaryota	k__Fungi	p__Basidiomycota	c__Agaricomycetes	o__Trechisporales	f__unclassified_o__Trechisporales	g__unclassified_o__Trechisporales	s__unclassified_o__Trechisporales	OTU1058	2	7.14082e-06	0.111111
d__Eukaryota	k__Fungi	p__Ascomycota	c__Dothideomycetes	o__Capnodiales	f__unclassified_o__Capnodiales	g__unclassified_o__Capnodiales	s__unclassified_o__Capnodiales	OTU433	12	4.28449e-05	0.222222
d__Eukaryota	k__Fungi	p__Ascomycota	c__Sordariomycetes	o__unclassified_c__Sordariomycetes	f__unclassified_c__Sordariomycetes	g__unclassified_c__Sordariomycetes	s__unclassified_c__Sordariomycetes	OTU364	12	4.28449e-05	0.333333
d__Eukaryota	k__Fungi	p__Basidiomycota	c__Agaricomycetes	o__Agaricales	f__Strophariaceae	g__Hypholoma	s__Hypholoma_sp	OTU1328	14	4.99857e-05	0.333333
d__Eukaryota	k__Fungi	p__Ascomycota	c__Dothideomycetes	o__Pleosporales	f__Didymellaceae	g__Epicoccum	s__Epicoccum_sorghinum	OTU930	2615	0.00933662	0.666667
d__Eukaryota	k__Fungi	p__Ascomycota	c__Dothideomycetes	o__Pleosporales	f__Phaeosphaeriaceae	g__Setophaeosphaeria	s__Setophaeosphaeria_badalingensis	OTU1277	32	0.000114253	0.111111
d__Eukaryota	k__Fungi	p__Ascomycota	c__Arthoniomycetes	o__Arthoniales	f__Arthoniaceae	g__Arthothelium	s__Arthothelium_spectabile	OTU1154	44	0.000157098	0.111111
d__Eukaryota	k__Fungi	p__Basidiomycota	c__Agaricomycetes	o__Sebacinales	f__Serendipitaceae	g__unclassified_f__Serendipitaceae	s__Serendipitaceae_sp	OTU861	40	0.000142816	0.111111
d__Eukaryota	k__Fungi	p__Ascomycota	c__Leotiomycetes	o__Thelebolales	f__Pseudeurotiaceae	g__Pseudeurotium	s__Pseudeurotium_sp	OTU2014	27	9.6401e-05	0.222222
d__Eukaryota	k__Fungi	p__unclassified_k__Fungi	c__unclassified_k__Fungi	o__unclassified_k__Fungi	f__unclassified_k__Fungi	g__unclassified_k__Fungi	s__unclassified_k__Fungi	OTU913	10	3.57041e-05	0.444444
d__Eukaryota	k__Fungi	p__Glomeromycota	c__Glomeromycetes	o__Glomerales	f__Glomeraceae	g__Rhizophagus	s__Rhizophagus_sp	OTU235	7	2.49929e-05	0.111111
d__Eukaryota	k__Fungi	p__Ascomycota	c__Sordariomycetes	o__Hypocreales	f__Clavicipitaceae	g__Collarina	s__Collarina_aurantiaca	OTU1297	3	1.07112e-05	0.111111
d__Eukaryota	k__Fungi	p__Ascomycota	c__Sordariomycetes	o__Sordariales	f__Lasiosphaeriaceae	g__Cladorrhinum	s__Cladorrhinum_sp	OTU1395	1	3.57041e-06	0.111111
d__Eukaryota	k__Fungi	p__Basidiomycota	c__Tremellomycetes	o__Filobasidiales	f__Filobasidiaceae	g__Heterocephalacria	s__Heterocephalacria_sp	OTU49	12	4.28449e-05	0.222222
d__Eukaryota	k__Fungi	p__Ascomycota	c__Eurotiomycetes	o__Chaetothyriales	f__Cyphellophoraceae	g__Cyphellophora	s__unclassified_g__Cyphellophora	OTU487	5	1.7852e-05	0.111111
d__Eukaryota	k__Fungi	p__Basidiomycota	c__Microbotryomycetes	o__Kriegeriales	f__unclassified_o__Kriegeriales	g__unclassified_o__Kriegeriales	s__unclassified_o__Kriegeriales	OTU1360	15	5.35561e-05	0.111111
d__Eukaryota	k__Fungi	p__Basidiomycota	c__Agaricomycetes	o__Sebacinales	f__unclassified_o__Sebacinales	g__unclassified_o__Sebacinales	s__unclassified_o__Sebacinales	OTU1288	4	1.42816e-05	0.111111
d__Eukaryota	k__Fungi	p__unclassified_k__Fungi	c__unclassified_k__Fungi	o__unclassified_k__Fungi	f__unclassified_k__Fungi	g__unclassified_k__Fungi	s__unclassified_k__Fungi	OTU13	1	3.57041e-06	0.111111
d__Eukaryota	k__Fungi	p__unclassified_k__Fungi	c__unclassified_k__Fungi	o__unclassified_k__Fungi	f__unclassified_k__Fungi	g__unclassified_k__Fungi	s__unclassified_k__Fungi	OTU12	1	3.57041e-06	0.111111
d__Eukaryota	k__Fungi	p__Ascomycota	c__Sordariomycetes	o__Hypocreales	f__Nectriaceae	g__Calonectria	s__unclassified_g__Calonectria	OTU1971	10479	0.0374143	0.888889
d__Eukaryota	k__Fungi	p__Ascomycota	c__Dothideomycetes	o__Pleosporales	f__Sporormiaceae	g__unclassified_f__Sporormiaceae	s__unclassified_f__Sporormiaceae	OTU883	43	0.000153528	0.222222
d__Eukaryota	k__Fungi	p__Basidiomycota	c__Agaricomycetes	o__Agaricales	f__Psathyrellaceae	g__Psathyrella	s__Psathyrella_efflorescens	OTU1426	1	3.57041e-06	0.111111
d__Eukaryota	k__Fungi	p__Ascomycota	c__Sordariomycetes	o__Xylariales	f__Xylariaceae	g__Xylaria	s__Xylaria_curta	OTU1048	3	1.07112e-05	0.111111
d__Eukaryota	k__Fungi	p__Ascomycota	c__Eurotiomycetes	o__Eurotiales	f__Aspergillaceae	g__Penicillium	s__Penicillium_phoeniceum	OTU938	4	1.42816e-05	0.111111
d__Eukaryota	k__Fungi	p__Basidiomycota	c__Agaricostilbomycetes	o__Agaricostilbales	f__Chionosphaeraceae	g__unclassified_f__Chionosphaeraceae	s__unclassified_f__Chionosphaeraceae	OTU519	4	1.42816e-05	0.111111
d__Eukaryota	k__Fungi	p__Ascomycota	c__Dothideomycetes	o__Pleosporales	f__Pleosporales_fam_Incertae_sedis	g__Fusculina	s__Fusculina_eucalypti	OTU836	2	7.14082e-06	0.111111
d__Eukaryota	k__Fungi	p__Ascomycota	c__Leotiomycetes	o__Helotiales	f__Helotiales_fam_Incertae_sedis	g__Rhexocercosporidium	s__Rhexocercosporidium_sp	OTU894	112	0.000399886	0.333333
d__Eukaryota	k__Fungi	p__Basidiomycota	c__Microbotryomycetes	o__Sporidiobolales	f__Sporidiobolaceae	g__Rhodotorula	s__Rhodotorula_babjevae	OTU572	1	3.57041e-06	0.111111
d__Eukaryota	k__Fungi	p__Basidiomycota	c__unclassified_p__Basidiomycota	o__unclassified_p__Basidiomycota	f__unclassified_p__Basidiomycota	g__unclassified_p__Basidiomycota	s__unclassified_p__Basidiomycota	OTU109	4	1.42816e-05	0.111111
d__Eukaryota	k__Fungi	p__Ascomycota	c__Sordariomycetes	o__Hypocreales	f__Clavicipitaceae	g__Metarhizium	s__Metarhizium_marquandii	OTU1339	9	3.21337e-05	0.111111
d__Eukaryota	k__Fungi	p__Ascomycota	c__Orbiliomycetes	o__Orbiliales	f__Orbiliaceae	g__unclassified_f__Orbiliaceae	s__unclassified_f__Orbiliaceae	OTU1097	20	7.14082e-05	0.111111
d__Eukaryota	k__Fungi	p__unclassified_k__Fungi	c__unclassified_k__Fungi	o__unclassified_k__Fungi	f__unclassified_k__Fungi	g__unclassified_k__Fungi	s__unclassified_k__Fungi	OTU868	1	3.57041e-06	0.111111
d__Eukaryota	k__Fungi	p__Basidiomycota	c__Agaricomycetes	o__unclassified_c__Agaricomycetes	f__unclassified_c__Agaricomycetes	g__unclassified_c__Agaricomycetes	s__unclassified_c__Agaricomycetes	OTU1425	4	1.42816e-05	0.111111
d__Eukaryota	k__Fungi	p__Ascomycota	c__Sordariomycetes	o__Hypocreales	f__unclassified_o__Hypocreales	g__unclassified_o__Hypocreales	s__unclassified_o__Hypocreales	OTU1454	1	3.57041e-06	0.111111
d__Eukaryota	k__Fungi	p__Ascomycota	c__Dothideomycetes	o__Pleosporales	f__unclassified_o__Pleosporales	g__unclassified_o__Pleosporales	s__unclassified_o__Pleosporales	OTU1493	94	0.000335618	0.222222
d__Eukaryota	k__Fungi	p__Ascomycota	c__Sordariomycetes	o__Glomerellales	f__Plectosphaerellaceae	g__Chordomyces	s__Chordomyces_antarcticus	OTU1465	2	7.14082e-06	0.111111
d__Eukaryota	k__Fungi	p__Ascomycota	c__Sordariomycetes	o__Diaporthales	f__Diaporthaceae	g__Diaporthe	s__unclassified_g__Diaporthe	OTU1033	4	1.42816e-05	0.222222
d__Eukaryota	k__Fungi	p__Basidiomycota	c__Agaricomycetes	o__Trechisporales	f__Hydnodontaceae	g__Trechispora	s__Trechispora_sp	OTU973	3	1.07112e-05	0.111111
d__Eukaryota	k__Fungi	p__Ascomycota	c__Dothideomycetes	o__Pleosporales	f__unclassified_o__Pleosporales	g__unclassified_o__Pleosporales	s__unclassified_o__Pleosporales	OTU425	1	3.57041e-06	0.111111
d__Eukaryota	k__Fungi	p__Ascomycota	c__Dothideomycetes	o__Pleosporales	f__Phaeosphaeriaceae	g__unclassified_f__Phaeosphaeriaceae	s__unclassified_f__Phaeosphaeriaceae	OTU1317	1	3.57041e-06	0.111111
d__Eukaryota	k__Fungi	p__Ascomycota	c__Eurotiomycetes	o__Chaetothyriales	f__unclassified_o__Chaetothyriales	g__unclassified_o__Chaetothyriales	s__unclassified_o__Chaetothyriales	OTU1963	2775	0.00990788	0.333333
d__Eukaryota	k__Fungi	p__Ascomycota	c__Sordariomycetes	o__Xylariales	f__Xylariaceae	g__Biscogniauxia	s__Biscogniauxia_latirima	OTU1368	4	1.42816e-05	0.111111
d__Eukaryota	k__Fungi	p__Ascomycota	c__Dothideomycetes	o__Pleosporales	f__unclassified_o__Pleosporales	g__unclassified_o__Pleosporales	s__unclassified_o__Pleosporales	OTU833	2	7.14082e-06	0.111111
d__Eukaryota	k__Fungi	p__Ascomycota	c__Sordariomycetes	o__Xylariales	f__Xylariaceae	g__Xylaria	s__Xylaria_venustula	OTU1423	2	7.14082e-06	0.111111
d__Eukaryota	k__Fungi	p__Ascomycota	c__unclassified_p__Ascomycota	o__unclassified_p__Ascomycota	f__unclassified_p__Ascomycota	g__unclassified_p__Ascomycota	s__unclassified_p__Ascomycota	OTU780	185	0.000660526	0.111111
d__Eukaryota	k__Fungi	p__Ascomycota	c__Dothideomycetes	o__Valsariales	f__Valsariaceae	g__Valsaria	s__unclassified_g__Valsaria	OTU762	1	3.57041e-06	0.111111
d__Eukaryota	k__Fungi	p__Ascomycota	c__Eurotiomycetes	o__Chaetothyriales	f__Chaetothyriales_fam_Incertae_sedis	g__Strelitziana	s__unclassified_g__Strelitziana	OTU981	34	0.000121394	0.222222
d__Eukaryota	k__Fungi	p__Ascomycota	c__Eurotiomycetes	o__Eurotiales	f__Aspergillaceae	g__Aspergillus	s__Aspergillus_cibarius	OTU690	1	3.57041e-06	0.111111
d__Eukaryota	k__Fungi	p__Ascomycota	c__Eurotiomycetes	o__Eurotiales	f__Aspergillaceae	g__Aspergillus	s__Aspergillus_penicillioides	OTU580	51	0.000182091	0.333333
d__Eukaryota	k__Fungi	p__Basidiomycota	c__Agaricomycetes	o__Cantharellales	f__Ceratobasidiaceae	g__Rhizoctonia	s__Rhizoctonia_bicornis	OTU888	819	0.00292416	0.222222
d__Eukaryota	k__Fungi	p__Ascomycota	c__Sordariomycetes	o__Xylariales	f__unclassified_o__Xylariales	g__unclassified_o__Xylariales	s__unclassified_o__Xylariales	OTU1662	1	3.57041e-06	0.111111
d__Eukaryota	k__Fungi	p__unclassified_k__Fungi	c__unclassified_k__Fungi	o__unclassified_k__Fungi	f__unclassified_k__Fungi	g__unclassified_k__Fungi	s__unclassified_k__Fungi	OTU646	7	2.49929e-05	0.111111
d__Eukaryota	k__Fungi	p__Ascomycota	c__Sordariomycetes	o__Xylariales	f__Xylariaceae	g__unclassified_f__Xylariaceae	s__unclassified_f__Xylariaceae	OTU1075	1	3.57041e-06	0.111111
d__Eukaryota	k__Fungi	p__Ascomycota	c__Eurotiomycetes	o__Chaetothyriales	f__Trichomeriaceae	g__Trichomerium	s__Trichomerium_gloeosporum	OTU1047	16	5.71265e-05	0.222222
d__Eukaryota	k__Fungi	p__Ascomycota	c__Dothideomycetes	o__Pleosporales	f__Coniothyriaceae	g__unclassified_f__Coniothyriaceae	s__unclassified_f__Coniothyriaceae	OTU535	1	3.57041e-06	0.111111
d__Eukaryota	k__Fungi	p__Ascomycota	c__Sordariomycetes	o__unclassified_c__Sordariomycetes	f__unclassified_c__Sordariomycetes	g__unclassified_c__Sordariomycetes	s__unclassified_c__Sordariomycetes	OTU832	3	1.07112e-05	0.111111
d__Eukaryota	k__Fungi	p__Basidiomycota	c__Tremellomycetes	o__Tremellales	f__Bulleribasidiaceae	g__Hannaella	s__Hannaella_oryzae	OTU1066	2	7.14082e-06	0.222222
d__Eukaryota	k__Fungi	p__Basidiomycota	c__Tremellomycetes	o__Tremellales	f__Bulleribasidiaceae	g__Vishniacozyma	s__Vishniacozyma_taibaiensis	OTU1156	9	3.21337e-05	0.222222
d__Eukaryota	k__Fungi	p__Ascomycota	c__Eurotiomycetes	o__Chaetothyriales	f__Chaetothyriales_fam_Incertae_sedis	g__unclassified_f__Chaetothyriales_fam_Incertae_sedis	s__unclassified_f__Chaetothyriales_fam_Incertae_sedis	OTU1478	6	2.14225e-05	0.111111
d__Eukaryota	k__Fungi	p__Ascomycota	c__Eurotiomycetes	o__Chaetothyriales	f__Herpotrichiellaceae	g__Cladophialophora	s__Cladophialophora_sp	OTU1467	3	1.07112e-05	0.111111
d__Eukaryota	k__Fungi	p__Ascomycota	c__unclassified_p__Ascomycota	o__unclassified_p__Ascomycota	f__unclassified_p__Ascomycota	g__unclassified_p__Ascomycota	s__unclassified_p__Ascomycota	OTU948	12	4.28449e-05	0.111111
d__Eukaryota	k__Fungi	p__Ascomycota	c__Sordariomycetes	o__Xylariales	f__Apiosporaceae	g__Arthrinium	s__Arthrinium_sp	OTU214	12	4.28449e-05	0.111111
d__Eukaryota	k__Fungi	p__Ascomycota	c__Eurotiomycetes	o__Chaetothyriales	f__Herpotrichiellaceae	g__Cladophialophora	s__unclassified_g__Cladophialophora	OTU490	28	9.99714e-05	0.111111
d__Eukaryota	k__Fungi	p__Ascomycota	c__Sordariomycetes	o__Xylariales	f__Apiosporaceae	g__Arthrinium	s__unclassified_g__Arthrinium	OTU1110	1	3.57041e-06	0.111111
d__Eukaryota	k__Fungi	p__Ascomycota	c__Sordariomycetes	o__Hypocreales	f__Nectriaceae	g__Paracremonium	s__Paracremonium_sp	OTU911	176	0.000628392	1
d__Eukaryota	k__Fungi	p__Ascomycota	c__Sordariomycetes	o__Xylariales	f__Xylariaceae	g__Hypoxylon	s__unclassified_g__Hypoxylon	OTU2113	9	3.21337e-05	0.333333
d__Eukaryota	k__Fungi	p__Basidiomycota	c__Tremellomycetes	o__Filobasidiales	f__Filobasidiaceae	g__Filobasidium	s__Filobasidium_wieringae	OTU1422	3	1.07112e-05	0.111111
d__Eukaryota	k__Fungi	p__Ascomycota	c__Dothideomycetes	o__Pleosporales	f__Phaeosphaeriaceae	g__unclassified_f__Phaeosphaeriaceae	s__unclassified_f__Phaeosphaeriaceae	OTU2087	2	7.14082e-06	0.111111
d__Eukaryota	k__Fungi	p__Ascomycota	c__Dothideomycetes	o__Pleosporales	f__Phaeosphaeriaceae	g__unclassified_f__Phaeosphaeriaceae	s__unclassified_f__Phaeosphaeriaceae	OTU2084	42	0.000149957	0.444444
d__Eukaryota	k__Fungi	p__Ascomycota	c__Sordariomycetes	o__Xylariales	f__Xylariaceae	g__Xylaria	s__Xylaria_bambusicola	OTU1717	7	2.49929e-05	0.111111
d__Eukaryota	k__Fungi	p__Ascomycota	c__Sordariomycetes	o__Hypocreales	f__Bionectriaceae	g__Clonostachys	s__Clonostachys_rogersoniana	OTU1105	15	5.35561e-05	0.222222
d__Eukaryota	k__Fungi	p__unclassified_k__Fungi	c__unclassified_k__Fungi	o__unclassified_k__Fungi	f__unclassified_k__Fungi	g__unclassified_k__Fungi	s__unclassified_k__Fungi	OTU851	1	3.57041e-06	0.111111
d__Eukaryota	k__Fungi	p__unclassified_k__Fungi	c__unclassified_k__Fungi	o__unclassified_k__Fungi	f__unclassified_k__Fungi	g__unclassified_k__Fungi	s__unclassified_k__Fungi	OTU856	2	7.14082e-06	0.222222
d__Eukaryota	k__Fungi	p__Basidiomycota	c__Agaricomycetes	o__Agaricales	f__Psathyrellaceae	g__Psathyrella	s__Psathyrella_candolleana	OTU934	3	1.07112e-05	0.111111
d__Eukaryota	k__Fungi	p__unclassified_k__Fungi	c__unclassified_k__Fungi	o__unclassified_k__Fungi	f__unclassified_k__Fungi	g__unclassified_k__Fungi	s__unclassified_k__Fungi	OTU858	10	3.57041e-05	0.111111
d__Eukaryota	k__Fungi	p__Ascomycota	c__Sordariomycetes	o__Xylariales	f__Xylariaceae	g__Xylaria	s__Xylaria_brevipes	OTU1347	2	7.14082e-06	0.111111
d__Eukaryota	k__Fungi	p__Basidiomycota	c__Agaricomycetes	o__Boletales	f__Coniophoraceae	g__Gyrodontium	s__Gyrodontium_sacchari	OTU1165	3	1.07112e-05	0.111111
d__Eukaryota	k__Fungi	p__Ascomycota	c__Eurotiomycetes	o__Chaetothyriales	f__unclassified_o__Chaetothyriales	g__unclassified_o__Chaetothyriales	s__unclassified_o__Chaetothyriales	OTU1114	248	0.000885461	0.333333
d__Eukaryota	k__Fungi	p__Ascomycota	c__Sordariomycetes	o__Trichosphaeriales	f__Trichosphaeriaceae	g__Nigrospora	s__Nigrospora_oryzae	OTU143	45	0.000160668	0.333333
d__Eukaryota	k__Fungi	p__Mortierellomycota	c__Mortierellomycetes	o__Mortierellales	f__Mortierellaceae	g__Mortierella	s__Mortierella_elongata	OTU1932	2	7.14082e-06	0.111111
d__Eukaryota	k__Fungi	p__Ascomycota	c__Dothideomycetes	o__Pleosporales	f__unclassified_o__Pleosporales	g__unclassified_o__Pleosporales	s__unclassified_o__Pleosporales	OTU1272	8	2.85633e-05	0.111111
d__Eukaryota	k__Fungi	p__Ascomycota	c__Dothideomycetes	o__Pleosporales	f__Didymosphaeriaceae	g__Montagnula	s__unclassified_g__Montagnula	OTU1031	10	3.57041e-05	0.111111
d__Eukaryota	k__Fungi	p__Ascomycota	c__Dothideomycetes	o__Pleosporales	f__Didymosphaeriaceae	g__Tremateia	s__Tremateia_sp	OTU2108	1	3.57041e-06	0.111111
d__Eukaryota	k__Fungi	p__Ascomycota	c__unclassified_p__Ascomycota	o__unclassified_p__Ascomycota	f__unclassified_p__Ascomycota	g__unclassified_p__Ascomycota	s__unclassified_p__Ascomycota	OTU1086	16	5.71265e-05	0.111111
d__Eukaryota	k__Fungi	p__Ascomycota	c__unclassified_p__Ascomycota	o__unclassified_p__Ascomycota	f__unclassified_p__Ascomycota	g__unclassified_p__Ascomycota	s__unclassified_p__Ascomycota	OTU1087	8	2.85633e-05	0.333333
d__Eukaryota	k__Fungi	p__Ascomycota	c__unclassified_p__Ascomycota	o__unclassified_p__Ascomycota	f__unclassified_p__Ascomycota	g__unclassified_p__Ascomycota	s__unclassified_p__Ascomycota	OTU1084	1	3.57041e-06	0.111111
d__Eukaryota	k__Fungi	p__Ascomycota	c__unclassified_p__Ascomycota	o__unclassified_p__Ascomycota	f__unclassified_p__Ascomycota	g__unclassified_p__Ascomycota	s__unclassified_p__Ascomycota	OTU1311	2	7.14082e-06	0.111111
d__Eukaryota	k__Fungi	p__Basidiomycota	c__Agaricomycetes	o__Polyporales	f__unclassified_o__Polyporales	g__unclassified_o__Polyporales	s__unclassified_o__Polyporales	OTU1123	1	3.57041e-06	0.111111
d__Eukaryota	k__Fungi	p__Ascomycota	c__unclassified_p__Ascomycota	o__unclassified_p__Ascomycota	f__unclassified_p__Ascomycota	g__unclassified_p__Ascomycota	s__unclassified_p__Ascomycota	OTU1264	2	7.14082e-06	0.111111
d__Eukaryota	k__Fungi	p__Basidiomycota	c__Agaricomycetes	o__unclassified_c__Agaricomycetes	f__unclassified_c__Agaricomycetes	g__unclassified_c__Agaricomycetes	s__unclassified_c__Agaricomycetes	OTU1251	4	1.42816e-05	0.111111
d__Eukaryota	k__Fungi	p__Ascomycota	c__Sordariomycetes	o__Hypocreales	f__Bionectriaceae	g__unclassified_f__Bionectriaceae	s__unclassified_f__Bionectriaceae	OTU1230	8	2.85633e-05	0.111111
d__Eukaryota	k__Fungi	p__Ascomycota	c__Saccharomycetes	o__Saccharomycetales	f__Saccharomycetales_fam_Incertae_sedis	g__Diutina	s__Diutina_neorugosa	OTU1076	13	4.64153e-05	0.222222
d__Eukaryota	k__Fungi	p__Ascomycota	c__Dothideomycetes	o__Pleosporales	f__unclassified_o__Pleosporales	g__unclassified_o__Pleosporales	s__unclassified_o__Pleosporales	OTU378	26	9.28306e-05	0.444444
d__Eukaryota	k__Fungi	p__Ascomycota	c__Dothideomycetes	o__Pleosporales	f__Teichosporaceae	g__Teichospora	s__unclassified_g__Teichospora	OTU1238	3	1.07112e-05	0.111111
d__Eukaryota	k__Fungi	p__Ascomycota	c__Sordariomycetes	o__Hypocreales	f__Hypocreales_fam_Incertae_sedis	g__Ustilaginoidea	s__Ustilaginoidea_sp	OTU2024	36	0.000128535	0.333333
d__Eukaryota	k__Fungi	p__Ascomycota	c__Sordariomycetes	o__Diaporthales	f__Diaporthaceae	g__Diaporthe	s__unclassified_g__Diaporthe	OTU1189	182	0.000649814	0.444444
d__Eukaryota	k__Fungi	p__Ascomycota	c__Dothideomycetes	o__Pleosporales	f__Dictyosporiaceae	g__Dictyocheirospora	s__Dictyocheirospora_garethjonesii	OTU1372	2	7.14082e-06	0.111111
d__Eukaryota	k__Fungi	p__unclassified_k__Fungi	c__unclassified_k__Fungi	o__unclassified_k__Fungi	f__unclassified_k__Fungi	g__unclassified_k__Fungi	s__unclassified_k__Fungi	OTU1432	2	7.14082e-06	0.111111
d__Eukaryota	k__Fungi	p__Ascomycota	c__Dothideomycetes	o__Capnodiales	f__Mycosphaerellaceae	g__unclassified_f__Mycosphaerellaceae	s__unclassified_f__Mycosphaerellaceae	OTU822	19	6.78378e-05	0.111111
d__Eukaryota	k__Fungi	p__Ascomycota	c__Dothideomycetes	o__Pleosporales	f__Lophiotremataceae	g__Lophiotrema	s__Lophiotrema_sp	OTU2098	613	0.00218866	0.555556
d__Eukaryota	k__Fungi	p__Ascomycota	c__Sordariomycetes	o__unclassified_c__Sordariomycetes	f__unclassified_c__Sordariomycetes	g__unclassified_c__Sordariomycetes	s__unclassified_c__Sordariomycetes	OTU1290	2	7.14082e-06	0.111111
d__Eukaryota	k__Fungi	p__Ascomycota	c__Leotiomycetes	o__Helotiales	f__Hyaloscyphaceae	g__Rodwayella	s__Rodwayella_sessilis	OTU1104	2	7.14082e-06	0.111111
d__Eukaryota	k__Fungi	p__Ascomycota	c__Eurotiomycetes	o__Chaetothyriales	f__Cyphellophoraceae	g__Cyphellophora	s__unclassified_g__Cyphellophora	OTU1191	53	0.000189232	0.444444
d__Eukaryota	k__Fungi	p__Ascomycota	c__Sordariomycetes	o__Hypocreales	f__Nectriaceae	g__Penicillifer	s__unclassified_g__Penicillifer	OTU908	7970	0.0284562	0.222222
d__Eukaryota	k__Fungi	p__Ascomycota	c__Sordariomycetes	o__Hypocreales	f__Nectriaceae	g__Fusicolla	s__Fusicolla_aquaeductuum	OTU1016	11	3.92745e-05	0.111111
d__Eukaryota	k__Fungi	p__Basidiomycota	c__Exobasidiomycetes	o__unclassified_c__Exobasidiomycetes	f__unclassified_c__Exobasidiomycetes	g__unclassified_c__Exobasidiomycetes	s__Exobasidiomycetes_sp	OTU1235	2	7.14082e-06	0.111111
d__Eukaryota	k__Fungi	p__Ascomycota	c__Sordariomycetes	o__Glomerellales	f__Glomerellaceae	g__Colletotrichum	s__unclassified_g__Colletotrichum	OTU640	18304	0.0653528	0.666667
d__Eukaryota	k__Fungi	p__Ascomycota	c__Sordariomycetes	o__Xylariales	f__Xylariaceae	g__Hypoxylon	s__Hypoxylon_laminosum	OTU1008	22	7.8549e-05	0.333333
d__Eukaryota	k__Fungi	p__Ascomycota	c__Sordariomycetes	o__Hypocreales	f__Clavicipitaceae	g__Metapochonia	s__Metapochonia_bulbillosa	OTU1329	452	0.00161382	0.222222
d__Eukaryota	k__Fungi	p__Ascomycota	c__Dothideomycetes	o__Pleosporales	f__Phaeosphaeriaceae	g__Leptospora	s__Leptospora_sp	OTU785	5	1.7852e-05	0.111111
d__Eukaryota	k__Fungi	p__Ascomycota	c__Eurotiomycetes	o__Eurotiales	f__Aspergillaceae	g__Aspergillus	s__unclassified_g__Aspergillus	OTU862	10	3.57041e-05	0.111111
d__Eukaryota	k__Fungi	p__Ascomycota	c__unclassified_p__Ascomycota	o__unclassified_p__Ascomycota	f__unclassified_p__Ascomycota	g__unclassified_p__Ascomycota	s__unclassified_p__Ascomycota	OTU919	73	0.00026064	0.111111
d__Eukaryota	k__Fungi	p__Ascomycota	c__Sordariomycetes	o__unclassified_c__Sordariomycetes	f__unclassified_c__Sordariomycetes	g__unclassified_c__Sordariomycetes	s__unclassified_c__Sordariomycetes	OTU132	5	1.7852e-05	0.222222
d__Eukaryota	k__Fungi	p__Ascomycota	c__Sordariomycetes	o__unclassified_c__Sordariomycetes	f__unclassified_c__Sordariomycetes	g__unclassified_c__Sordariomycetes	s__unclassified_c__Sordariomycetes	OTU133	2	7.14082e-06	0.111111
d__Eukaryota	k__Fungi	p__Ascomycota	c__Eurotiomycetes	o__Chaetothyriales	f__Herpotrichiellaceae	g__Cladophialophora	s__Cladophialophora_sp	OTU1113	258	0.000921165	0.333333
d__Eukaryota	k__Fungi	p__Basidiomycota	c__unclassified_p__Basidiomycota	o__unclassified_p__Basidiomycota	f__unclassified_p__Basidiomycota	g__unclassified_p__Basidiomycota	s__unclassified_p__Basidiomycota	OTU808	1	3.57041e-06	0.111111
d__Eukaryota	k__Fungi	p__Ascomycota	c__Dothideomycetes	o__Pleosporales	f__Pleosporales_fam_Incertae_sedis	g__Nigrograna	s__Nigrograna_cangshanensis	OTU1157	1	3.57041e-06	0.111111
d__Eukaryota	k__Fungi	p__Ascomycota	c__Sordariomycetes	o__Hypocreales	f__Hypocreales_fam_Incertae_sedis	g__Acremonium	s__unclassified_g__Acremonium	OTU1309	7	2.49929e-05	0.111111
d__Eukaryota	k__Fungi	p__Ascomycota	c__Eurotiomycetes	o__Chaetothyriales	f__Herpotrichiellaceae	g__unclassified_f__Herpotrichiellaceae	s__unclassified_f__Herpotrichiellaceae	OTU368	5	1.7852e-05	0.111111
d__Eukaryota	k__Fungi	p__Ascomycota	c__unclassified_p__Ascomycota	o__unclassified_p__Ascomycota	f__unclassified_p__Ascomycota	g__unclassified_p__Ascomycota	s__unclassified_p__Ascomycota	OTU128	862	0.00307769	0.666667
d__Eukaryota	k__Fungi	p__Ascomycota	c__Dothideomycetes	o__Pleosporales	f__Tetraplosphaeriaceae	g__Polyplosphaeria	s__Polyplosphaeria_fusca	OTU1435	1	3.57041e-06	0.111111
d__Eukaryota	k__Fungi	p__Ascomycota	c__Eurotiomycetes	o__Chaetothyriales	f__Herpotrichiellaceae	g__unclassified_f__Herpotrichiellaceae	s__unclassified_f__Herpotrichiellaceae	OTU1040	107	0.000382034	0.333333
d__Eukaryota	k__Fungi	p__Ascomycota	c__Eurotiomycetes	o__Eurotiales	f__Aspergillaceae	g__Penicillium	s__Penicillium_ochrochloron	OTU864	33	0.000117823	0.111111
d__Eukaryota	k__Fungi	p__Ascomycota	c__Sordariomycetes	o__Hypocreales	f__Hypocreaceae	g__Trichoderma	s__unclassified_g__Trichoderma	OTU953	2	7.14082e-06	0.111111
d__Eukaryota	k__Fungi	p__Ascomycota	c__Dothideomycetes	o__Pleosporales	f__Pleosporales_fam_Incertae_sedis	g__Dokmaia	s__Dokmaia_monthadangi	OTU2008	1	3.57041e-06	0.111111
d__Eukaryota	k__Fungi	p__Ascomycota	c__Sordariomycetes	o__Xylariales	f__Xylariaceae	g__unclassified_f__Xylariaceae	s__unclassified_f__Xylariaceae	OTU982	5	1.7852e-05	0.222222
d__Eukaryota	k__Fungi	p__Ascomycota	c__unclassified_p__Ascomycota	o__unclassified_p__Ascomycota	f__unclassified_p__Ascomycota	g__unclassified_p__Ascomycota	s__unclassified_p__Ascomycota	OTU1029	5	1.7852e-05	0.222222
d__Eukaryota	k__Fungi	p__Ascomycota	c__Leotiomycetes	o__Helotiales	f__unclassified_o__Helotiales	g__unclassified_o__Helotiales	s__unclassified_o__Helotiales	OTU1275	16	5.71265e-05	0.111111
d__Eukaryota	k__Fungi	p__Ascomycota	c__unclassified_p__Ascomycota	o__unclassified_p__Ascomycota	f__unclassified_p__Ascomycota	g__unclassified_p__Ascomycota	s__unclassified_p__Ascomycota	OTU1322	4	1.42816e-05	0.111111
d__Eukaryota	k__Fungi	p__Ascomycota	c__Dothideomycetes	o__Capnodiales	f__Cladosporiaceae	g__Rachicladosporium	s__Rachicladosporium_sp	OTU1194	49	0.00017495	0.333333
d__Eukaryota	k__Fungi	p__Ascomycota	c__Eurotiomycetes	o__Chaetothyriales	f__Herpotrichiellaceae	g__unclassified_f__Herpotrichiellaceae	s__unclassified_f__Herpotrichiellaceae	OTU106	253	0.000903313	0.444444
d__Eukaryota	k__Fungi	p__Ascomycota	c__unclassified_p__Ascomycota	o__unclassified_p__Ascomycota	f__unclassified_p__Ascomycota	g__unclassified_p__Ascomycota	s__unclassified_p__Ascomycota	OTU1259	38	0.000135676	0.111111
d__Eukaryota	k__Fungi	p__Basidiomycota	c__Agaricomycetes	o__unclassified_c__Agaricomycetes	f__unclassified_c__Agaricomycetes	g__unclassified_c__Agaricomycetes	s__unclassified_c__Agaricomycetes	OTU1229	2	7.14082e-06	0.111111
d__Eukaryota	k__Fungi	p__Ascomycota	c__Dothideomycetes	o__Pleosporales	f__Periconiaceae	g__Periconia	s__unclassified_g__Periconia	OTU1021	3	1.07112e-05	0.111111
d__Eukaryota	k__Fungi	p__Ascomycota	c__Eurotiomycetes	o__Chaetothyriales	f__Trichomeriaceae	g__unclassified_f__Trichomeriaceae	s__Trichomeriaceae_sp	OTU1090	2269	0.00810126	0.333333
d__Eukaryota	k__Fungi	p__Ascomycota	c__Eurotiomycetes	o__Chaetothyriales	f__Herpotrichiellaceae	g__Exophiala	s__unclassified_g__Exophiala	OTU1181	126	0.000449871	0.333333
d__Eukaryota	k__Fungi	p__Ascomycota	c__Dothideomycetes	o__Pleosporales	f__Lophiotremataceae	g__Lophiotrema	s__Lophiotrema_sp	OTU1471	4	1.42816e-05	0.111111
d__Eukaryota	k__Fungi	p__unclassified_k__Fungi	c__unclassified_k__Fungi	o__unclassified_k__Fungi	f__unclassified_k__Fungi	g__unclassified_k__Fungi	s__unclassified_k__Fungi	OTU1924	2	7.14082e-06	0.222222
d__Eukaryota	k__Fungi	p__Ascomycota	c__Sordariomycetes	o__Hypocreales	f__Nectriaceae	g__Cylindrocarpon	s__Cylindrocarpon_sp	OTU853	111	0.000396315	0.111111
d__Eukaryota	k__Fungi	p__Ascomycota	c__Dothideomycetes	o__Pleosporales	f__Phaeosphaeriaceae	g__Setophoma	s__Setophoma_sp	OTU2028	136	0.000485576	0.333333
d__Eukaryota	k__Fungi	p__Ascomycota	c__Saccharomycetes	o__Saccharomycetales	f__Pichiaceae	g__Pichia	s__Pichia_kluyveri	OTU1063	1	3.57041e-06	0.111111
d__Eukaryota	k__Fungi	p__Ascomycota	c__Dothideomycetes	o__Pleosporales	f__Periconiaceae	g__Periconia	s__Periconia_sp	OTU1180	16	5.71265e-05	0.222222
d__Eukaryota	k__Fungi	p__Ascomycota	c__unclassified_p__Ascomycota	o__unclassified_p__Ascomycota	f__unclassified_p__Ascomycota	g__unclassified_p__Ascomycota	s__unclassified_p__Ascomycota	OTU1411	3	1.07112e-05	0.222222
d__Eukaryota	k__Fungi	p__Ascomycota	c__Eurotiomycetes	o__Eurotiales	f__Aspergillaceae	g__Penicillium	s__Penicillium_sclerotiorum	OTU1378	42	0.000149957	0.222222
d__Eukaryota	k__Fungi	p__Ascomycota	c__Dothideomycetes	o__Capnodiales	f__Mycosphaerellaceae	g__Pseudocercospora	s__unclassified_g__Pseudocercospora	OTU805	864	0.00308483	0.444444
d__Eukaryota	k__Fungi	p__Basidiomycota	c__Tremellomycetes	o__Cystofilobasidiales	f__Mrakiaceae	g__Mrakia	s__Mrakia_blollopis	OTU900	42	0.000149957	0.111111
d__Eukaryota	k__Fungi	p__Ascomycota	c__Eurotiomycetes	o__Eurotiales	f__Aspergillaceae	g__Aspergillus	s__Aspergillus_penicillioides	OTU1598	2	7.14082e-06	0.111111
d__Eukaryota	k__Fungi	p__Ascomycota	c__Eurotiomycetes	o__Eurotiales	f__Aspergillaceae	g__Aspergillus	s__unclassified_g__Aspergillus	OTU873	13	4.64153e-05	0.222222
d__Eukaryota	k__Fungi	p__Ascomycota	c__Eurotiomycetes	o__Chaetothyriales	f__Herpotrichiellaceae	g__unclassified_f__Herpotrichiellaceae	s__unclassified_f__Herpotrichiellaceae	OTU977	453	0.0016174	0.333333
d__Eukaryota	k__Fungi	p__Ascomycota	c__Sordariomycetes	o__Glomerellales	f__Plectosphaerellaceae	g__unclassified_f__Plectosphaerellaceae	s__unclassified_f__Plectosphaerellaceae	OTU799	8	2.85633e-05	0.111111
d__Eukaryota	k__Fungi	p__Ascomycota	c__Dothideomycetes	o__Pleosporales	f__Pleosporales_fam_Incertae_sedis	g__Microsphaeropsis	s__Microsphaeropsis_arundinis	OTU1356	3	1.07112e-05	0.111111
d__Eukaryota	k__Fungi	p__Ascomycota	c__Sordariomycetes	o__Xylariales	f__unclassified_o__Xylariales	g__unclassified_o__Xylariales	s__unclassified_o__Xylariales	OTU1044	4	1.42816e-05	0.111111
d__Eukaryota	k__Fungi	p__Ascomycota	c__Eurotiomycetes	o__Chaetothyriales	f__Cyphellophoraceae	g__Cyphellophora	s__Cyphellophora_pauciseptata	OTU824	27	9.6401e-05	0.222222
d__Eukaryota	k__Fungi	p__Ascomycota	c__Sordariomycetes	o__Xylariales	f__unclassified_o__Xylariales	g__unclassified_o__Xylariales	s__unclassified_o__Xylariales	OTU1196	9	3.21337e-05	0.222222
d__Eukaryota	k__Fungi	p__Basidiomycota	c__Agaricomycetes	o__Cantharellales	f__Botryobasidiaceae	g__Botryohypochnus	s__Botryohypochnus_sp	OTU1316	3	1.07112e-05	0.111111
d__Eukaryota	k__Fungi	p__Basidiomycota	c__Agaricomycetes	o__Agaricales	f__Strophariaceae	g__Hypholoma	s__Hypholoma_sp	OTU1015	6	2.14225e-05	0.333333
d__Eukaryota	k__Fungi	p__Ascomycota	c__Sordariomycetes	o__unclassified_c__Sordariomycetes	f__unclassified_c__Sordariomycetes	g__unclassified_c__Sordariomycetes	s__unclassified_c__Sordariomycetes	OTU1353	1	3.57041e-06	0.111111
d__Eukaryota	k__Fungi	p__Ascomycota	c__Sordariomycetes	o__Xylariales	f__Xylariaceae	g__Digitodochium	s__Digitodochium_rhodoleucum	OTU1148	5	1.7852e-05	0.444444
d__Eukaryota	k__Fungi	p__Ascomycota	c__Eurotiomycetes	o__Chaetothyriales	f__Herpotrichiellaceae	g__Exophiala	s__Exophiala_pisciphila	OTU925	824	0.00294202	0.555556
d__Eukaryota	k__Fungi	p__Ascomycota	c__Sordariomycetes	o__Diaporthales	f__Diaporthaceae	g__Diaporthe	s__unclassified_g__Diaporthe	OTU1172	16	5.71265e-05	0.222222
d__Eukaryota	k__Fungi	p__Basidiomycota	c__Tremellomycetes	o__Trichosporonales	f__Trichosporonaceae	g__Apiotrichum	s__Apiotrichum_montevideense	OTU874	6	2.14225e-05	0.222222
d__Eukaryota	k__Fungi	p__Ascomycota	c__Sordariomycetes	o__unclassified_c__Sordariomycetes	f__unclassified_c__Sordariomycetes	g__unclassified_c__Sordariomycetes	s__unclassified_c__Sordariomycetes	OTU876	4	1.42816e-05	0.111111
d__Eukaryota	k__Fungi	p__Ascomycota	c__Eurotiomycetes	o__Chaetothyriales	f__Cyphellophoraceae	g__Cyphellophora	s__unclassified_g__Cyphellophora	OTU1212	120	0.000428449	0.333333
d__Eukaryota	k__Fungi	p__Ascomycota	c__Dothideomycetes	o__Pleosporales	f__Didymosphaeriaceae	g__Paraconiothyrium	s__Paraconiothyrium_sp	OTU1073	7	2.49929e-05	0.222222
d__Eukaryota	k__Fungi	p__Basidiomycota	c__Agaricomycetes	o__Agaricales	f__Lycoperdaceae	g__Lycoperdon	s__Lycoperdon_curtisii	OTU598	1	3.57041e-06	0.111111
d__Eukaryota	k__Fungi	p__Ascomycota	c__Dothideomycetes	o__Pleosporales	f__unclassified_o__Pleosporales	g__unclassified_o__Pleosporales	s__unclassified_o__Pleosporales	OTU1146	23	8.21194e-05	0.111111
d__Eukaryota	k__Fungi	p__Ascomycota	c__Dothideomycetes	o__Capnodiales	f__Mycosphaerellaceae	g__Neoceratosperma	s__Neoceratosperma_yunnanensis	OTU792	807	0.00288132	0.333333
d__Eukaryota	k__Fungi	p__Ascomycota	c__Sordariomycetes	o__Hypocreales	f__Nectriaceae	g__Fusarium	s__unclassified_g__Fusarium	OTU1003	2	7.14082e-06	0.222222
d__Eukaryota	k__Fungi	p__Ascomycota	c__Sordariomycetes	o__Xylariales	f__Xylariaceae	g__Nemania	s__unclassified_g__Nemania	OTU1402	2	7.14082e-06	0.111111
d__Eukaryota	k__Fungi	p__Basidiomycota	c__Tremellomycetes	o__Tremellales	f__Rhynchogastremataceae	g__Papiliotrema	s__Papiliotrema_flavescens	OTU1482	128	0.000457012	0.555556
d__Eukaryota	k__Fungi	p__Ascomycota	c__Leotiomycetes	o__Helotiales	f__Dermateaceae	g__Trimmatostroma	s__Trimmatostroma_cordae	OTU431	6	2.14225e-05	0.111111
d__Eukaryota	k__Fungi	p__Ascomycota	c__Dothideomycetes	o__Pleosporales	f__Phaeosphaeriaceae	g__Phaeosphaeria	s__Phaeosphaeria_microscopica	OTU635	147	0.00052485	0.555556
d__Eukaryota	k__Fungi	p__Ascomycota	c__Dothideomycetes	o__Pleosporales	f__unclassified_o__Pleosporales	g__unclassified_o__Pleosporales	s__unclassified_o__Pleosporales	OTU148	21	7.49786e-05	0.111111
d__Eukaryota	k__Fungi	p__unclassified_k__Fungi	c__unclassified_k__Fungi	o__unclassified_k__Fungi	f__unclassified_k__Fungi	g__unclassified_k__Fungi	s__unclassified_k__Fungi	OTU34	2	7.14082e-06	0.222222
d__Eukaryota	k__Fungi	p__Ascomycota	c__Eurotiomycetes	o__Chaetothyriales	f__Cyphellophoraceae	g__Cyphellophora	s__unclassified_g__Cyphellophora	OTU1451	1	3.57041e-06	0.111111
d__Eukaryota	k__Fungi	p__unclassified_k__Fungi	c__unclassified_k__Fungi	o__unclassified_k__Fungi	f__unclassified_k__Fungi	g__unclassified_k__Fungi	s__unclassified_k__Fungi	OTU31	1	3.57041e-06	0.111111
d__Eukaryota	k__Fungi	p__Ascomycota	c__Dothideomycetes	o__Pleosporales	f__unclassified_o__Pleosporales	g__unclassified_o__Pleosporales	s__unclassified_o__Pleosporales	OTU1293	13	4.64153e-05	0.222222
d__Eukaryota	k__Fungi	p__Ascomycota	c__Sordariomycetes	o__Hypocreales	f__Tilachlidiaceae	g__unclassified_f__Tilachlidiaceae	s__Tilachlidiaceae_sp	OTU1416	2	7.14082e-06	0.111111
d__Eukaryota	k__Fungi	p__Basidiomycota	c__Agaricomycetes	o__Polyporales	f__Xenasmataceae	g__Xenasmatella	s__Xenasmatella_sp	OTU1193	5	1.7852e-05	0.111111
d__Eukaryota	k__Fungi	p__Ascomycota	c__Sordariomycetes	o__Diaporthales	f__Diaporthaceae	g__Diaporthe	s__Diaporthe_xishuangbanica	OTU804	2	7.14082e-06	0.111111
d__Eukaryota	k__Fungi	p__Ascomycota	c__Dothideomycetes	o__Pleosporales	f__Phaeosphaeriaceae	g__Phaeosphaeriopsis	s__Phaeosphaeriopsis_musae	OTU2025	135	0.000482005	0.333333
d__Eukaryota	k__Fungi	p__Basidiomycota	c__Agaricomycetes	o__Polyporales	f__Ganodermataceae	g__Ganoderma	s__Ganoderma_sichuanense	OTU1728	2	7.14082e-06	0.111111
d__Eukaryota	k__Fungi	p__Basidiomycota	c__Agaricomycetes	o__Agaricales	f__Psathyrellaceae	g__Coprinellus	s__Coprinellus_micaceus	OTU1028	6	2.14225e-05	0.222222
d__Eukaryota	k__Fungi	p__Basidiomycota	c__Cystobasidiomycetes	o__Cystobasidiales	f__Cystobasidiaceae	g__Occultifur	s__Occultifur_externus	OTU350	4	1.42816e-05	0.111111
d__Eukaryota	k__Fungi	p__Ascomycota	c__Eurotiomycetes	o__Chaetothyriales	f__Herpotrichiellaceae	g__Capronia	s__Capronia_parasitica	OTU1455	17	6.06969e-05	0.111111
d__Eukaryota	k__Fungi	p__Ascomycota	c__Sordariomycetes	o__Hypocreales	f__Hypocreaceae	g__Monocillium	s__unclassified_g__Monocillium	OTU954	66	0.000235647	0.333333
d__Eukaryota	k__Fungi	p__Ascomycota	c__Sordariomycetes	o__Xylariales	f__Xylariaceae	g__Xylaria	s__Xylaria_curta	OTU998	1	3.57041e-06	0.111111
d__Eukaryota	k__Fungi	p__Ascomycota	c__Leotiomycetes	o__Helotiales	f__Helotiaceae	g__Articulospora	s__Articulospora_sp	OTU1082	3	1.07112e-05	0.222222
d__Eukaryota	k__Fungi	p__Ascomycota	c__unclassified_p__Ascomycota	o__unclassified_p__Ascomycota	f__unclassified_p__Ascomycota	g__unclassified_p__Ascomycota	s__unclassified_p__Ascomycota	OTU1242	2	7.14082e-06	0.111111
d__Eukaryota	k__Fungi	p__Ascomycota	c__Sordariomycetes	o__Xylariales	f__unclassified_o__Xylariales	g__unclassified_o__Xylariales	s__unclassified_o__Xylariales	OTU1250	4	1.42816e-05	0.111111
d__Eukaryota	k__Fungi	p__Ascomycota	c__Sordariomycetes	o__Glomerellales	f__Plectosphaerellaceae	g__Plectosphaerella	s__unclassified_g__Plectosphaerella	OTU1491	996	0.00355613	0.444444
d__Eukaryota	k__Fungi	p__Rozellomycota	c__unclassified_p__Rozellomycota	o__unclassified_p__Rozellomycota	f__unclassified_p__Rozellomycota	g__unclassified_p__Rozellomycota	s__Rozellomycota_sp	OTU499	5	1.7852e-05	0.111111
d__Eukaryota	k__Fungi	p__Ascomycota	c__Sordariomycetes	o__Hypocreales	f__Bionectriaceae	g__Hydropisphaera	s__Hydropisphaera_bambusicola	OTU1370	6	2.14225e-05	0.111111
d__Eukaryota	k__Fungi	p__Ascomycota	c__unclassified_p__Ascomycota	o__unclassified_p__Ascomycota	f__unclassified_p__Ascomycota	g__unclassified_p__Ascomycota	s__unclassified_p__Ascomycota	OTU1403	13	4.64153e-05	0.111111
d__Eukaryota	k__Fungi	p__Basidiomycota	c__Agaricomycetes	o__unclassified_c__Agaricomycetes	f__unclassified_c__Agaricomycetes	g__unclassified_c__Agaricomycetes	s__unclassified_c__Agaricomycetes	OTU121	115	0.000410597	0.222222
d__Eukaryota	k__Fungi	p__Basidiomycota	c__Agaricomycetes	o__unclassified_c__Agaricomycetes	f__unclassified_c__Agaricomycetes	g__unclassified_c__Agaricomycetes	s__unclassified_c__Agaricomycetes	OTU127	4	1.42816e-05	0.111111
d__Eukaryota	k__Fungi	p__Ascomycota	c__Sordariomycetes	o__Magnaporthales	f__Magnaporthaceae	g__Arxiella	s__Arxiella_dolichandrae	OTU2095	2	7.14082e-06	0.111111
d__Eukaryota	k__Fungi	p__Ascomycota	c__Dothideomycetes	o__Capnodiales	f__Mycosphaerellaceae	g__Neoceratosperma	s__Neoceratosperma_eucalypti	OTU828	5	1.7852e-05	0.111111
d__Eukaryota	k__Fungi	p__Basidiomycota	c__Agaricomycetes	o__Agaricales	f__Strophariaceae	g__Pholiota	s__Pholiota_multicingulata	OTU1204	18	6.42674e-05	0.222222
d__Eukaryota	k__Fungi	p__Basidiomycota	c__Agaricomycetes	o__Polyporales	f__Ganodermataceae	g__Loweporus	s__Loweporus_sp	OTU1051	7	2.49929e-05	0.222222
d__Eukaryota	k__Fungi	p__Basidiomycota	c__Tremellomycetes	o__Cystofilobasidiales	f__Mrakiaceae	g__Krasilnikovozyma	s__Krasilnikovozyma_sp	OTU213	4	1.42816e-05	0.222222
d__Eukaryota	k__Fungi	p__Ascomycota	c__Sordariomycetes	o__Xylariales	f__unclassified_o__Xylariales	g__unclassified_o__Xylariales	s__unclassified_o__Xylariales	OTU581	6	2.14225e-05	0.222222
d__Eukaryota	k__Fungi	p__Ascomycota	c__Leotiomycetes	o__Helotiales	f__Helotiaceae	g__Articulospora	s__Articulospora_sp	OTU1464	4	1.42816e-05	0.111111
d__Eukaryota	k__Fungi	p__Ascomycota	c__Dothideomycetes	o__Pleosporales	f__unclassified_o__Pleosporales	g__unclassified_o__Pleosporales	s__unclassified_o__Pleosporales	OTU1071	27	9.6401e-05	0.333333
d__Eukaryota	k__Fungi	p__Ascomycota	c__Dothideomycetes	o__Venturiales	f__Sympoventuriaceae	g__Ochroconis	s__Ochroconis_cordanae	OTU103	4992	0.0178235	0.444444
d__Eukaryota	k__Fungi	p__Ascomycota	c__Sordariomycetes	o__Xylariales	f__unclassified_o__Xylariales	g__unclassified_o__Xylariales	s__unclassified_o__Xylariales	OTU838	33	0.000117823	0.222222
d__Eukaryota	k__Fungi	p__Ascomycota	c__Sordariomycetes	o__Hypocreales	f__Nectriaceae	g__unclassified_f__Nectriaceae	s__unclassified_f__Nectriaceae	OTU1306	66	0.000235647	0.444444
d__Eukaryota	k__Fungi	p__Ascomycota	c__Dothideomycetes	o__Pleosporales	f__unclassified_o__Pleosporales	g__unclassified_o__Pleosporales	s__unclassified_o__Pleosporales	OTU1453	2	7.14082e-06	0.111111
d__Eukaryota	k__Fungi	p__Ascomycota	c__Sordariomycetes	o__Hypocreales	f__Nectriaceae	g__Albonectria	s__Albonectria_rigidiuscula	OTU1152	9	3.21337e-05	0.222222
d__Eukaryota	k__Fungi	p__Basidiomycota	c__Agaricomycetes	o__Cantharellales	f__Ceratobasidiaceae	g__Thanatephorus	s__unclassified_g__Thanatephorus	OTU115	36	0.000128535	0.111111
d__Eukaryota	k__Fungi	p__Ascomycota	c__Sordariomycetes	o__unclassified_c__Sordariomycetes	f__unclassified_c__Sordariomycetes	g__unclassified_c__Sordariomycetes	s__unclassified_c__Sordariomycetes	OTU1187	5	1.7852e-05	0.111111
d__Eukaryota	k__Fungi	p__Ascomycota	c__Sordariomycetes	o__Diaporthales	f__Valsaceae	g__Phomopsis	s__Phomopsis_asparagi	OTU811	5	1.7852e-05	0.222222
d__Eukaryota	k__Fungi	p__Ascomycota	c__Sordariomycetes	o__unclassified_c__Sordariomycetes	f__unclassified_c__Sordariomycetes	g__unclassified_c__Sordariomycetes	s__unclassified_c__Sordariomycetes	OTU1183	28	9.99714e-05	0.222222
d__Eukaryota	k__Fungi	p__Ascomycota	c__Eurotiomycetes	o__Chaetothyriales	f__unclassified_o__Chaetothyriales	g__unclassified_o__Chaetothyriales	s__unclassified_o__Chaetothyriales	OTU516	9	3.21337e-05	0.333333
d__Eukaryota	k__Fungi	p__Ascomycota	c__Sordariomycetes	o__unclassified_c__Sordariomycetes	f__unclassified_c__Sordariomycetes	g__unclassified_c__Sordariomycetes	s__unclassified_c__Sordariomycetes	OTU641	6	2.14225e-05	0.222222
d__Eukaryota	k__Fungi	p__Ascomycota	c__Sordariomycetes	o__Hypocreales	f__Nectriaceae	g__Nectria	s__Nectria_pseudotrichia	OTU1185	16	5.71265e-05	0.111111
d__Eukaryota	k__Fungi	p__Ascomycota	c__Saccharomycetes	o__Saccharomycetales	f__Pichiaceae	g__Ogataea	s__Ogataea_sp	OTU969	2	7.14082e-06	0.111111
d__Eukaryota	k__Fungi	p__unclassified_k__Fungi	c__unclassified_k__Fungi	o__unclassified_k__Fungi	f__unclassified_k__Fungi	g__unclassified_k__Fungi	s__unclassified_k__Fungi	OTU24	14	4.99857e-05	0.666667
d__Eukaryota	k__Fungi	p__Ascomycota	c__Orbiliomycetes	o__Orbiliales	f__Orbiliaceae	g__unclassified_f__Orbiliaceae	s__unclassified_f__Orbiliaceae	OTU1147	27	9.6401e-05	0.222222
d__Eukaryota	k__Fungi	p__unclassified_k__Fungi	c__unclassified_k__Fungi	o__unclassified_k__Fungi	f__unclassified_k__Fungi	g__unclassified_k__Fungi	s__unclassified_k__Fungi	OTU29	1	3.57041e-06	0.111111
d__Eukaryota	k__Fungi	p__Ascomycota	c__Sordariomycetes	o__Xylariales	f__Xylariaceae	g__unclassified_f__Xylariaceae	s__unclassified_f__Xylariaceae	OTU1137	6	2.14225e-05	0.111111
d__Eukaryota	k__Fungi	p__Ascomycota	c__Sordariomycetes	o__unclassified_c__Sordariomycetes	f__unclassified_c__Sordariomycetes	g__unclassified_c__Sordariomycetes	s__unclassified_c__Sordariomycetes	OTU48	22	7.8549e-05	0.111111
d__Eukaryota	k__Fungi	p__Ascomycota	c__Dothideomycetes	o__Capnodiales	f__unclassified_o__Capnodiales	g__unclassified_o__Capnodiales	s__unclassified_o__Capnodiales	OTU1291	12	4.28449e-05	0.111111
d__Eukaryota	k__Fungi	p__Basidiomycota	c__Agaricomycetes	o__Thelephorales	f__Thelephoraceae	g__unclassified_f__Thelephoraceae	s__unclassified_f__Thelephoraceae	OTU1394	2	7.14082e-06	0.111111
d__Eukaryota	k__Fungi	p__Basidiomycota	c__Agaricomycetes	o__Auriculariales	f__Exidiaceae	g__unclassified_f__Exidiaceae	s__unclassified_f__Exidiaceae	OTU1945	3	1.07112e-05	0.111111
d__Eukaryota	k__Fungi	p__Ascomycota	c__Sordariomycetes	o__Xylariales	f__Xylariaceae	g__Astrocystis	s__Astrocystis_bambusae	OTU533	2	7.14082e-06	0.111111
d__Eukaryota	k__Fungi	p__Ascomycota	c__Dothideomycetes	o__Pleosporales	f__Phaeosphaeriaceae	g__unclassified_f__Phaeosphaeriaceae	s__unclassified_f__Phaeosphaeriaceae	OTU2085	360	0.00128535	0.666667
d__Eukaryota	k__Fungi	p__Ascomycota	c__Dothideomycetes	o__Pleosporales	f__Didymosphaeriaceae	g__Letendraea	s__Letendraea_helminthicola	OTU614	1	3.57041e-06	0.111111
d__Eukaryota	k__Fungi	p__Ascomycota	c__Pezizomycetes	o__Pezizales	f__Pyronemataceae	g__Cheilymenia	s__Cheilymenia_theleboloides	OTU1326	11	3.92745e-05	0.111111
d__Eukaryota	k__Fungi	p__Ascomycota	c__Eurotiomycetes	o__Chaetothyriales	f__Herpotrichiellaceae	g__Exophiala	s__Exophiala_equina	OTU1543	4419	0.0157776	0.666667
d__Eukaryota	k__Fungi	p__Ascomycota	c__Sordariomycetes	o__unclassified_c__Sordariomycetes	f__unclassified_c__Sordariomycetes	g__unclassified_c__Sordariomycetes	s__unclassified_c__Sordariomycetes	OTU882	7	2.49929e-05	0.111111
d__Eukaryota	k__Fungi	p__Ascomycota	c__Dothideomycetes	o__Pleosporales	f__Pleomassariaceae	g__Prosthemium	s__Prosthemium_betulinum	OTU1065	3	1.07112e-05	0.111111
d__Eukaryota	k__Fungi	p__Ascomycota	c__Sordariomycetes	o__Sordariales	f__Sordariales_fam_Incertae_sedis	g__Conlarium	s__Conlarium_aquaticum	OTU1818	1	3.57041e-06	0.111111
d__Eukaryota	k__Fungi	p__Basidiomycota	c__Atractiellomycetes	o__Atractiellales	f__unclassified_o__Atractiellales	g__unclassified_o__Atractiellales	s__Atractiellales_sp	OTU764	14	4.99857e-05	0.111111
d__Eukaryota	k__Fungi	p__Ascomycota	c__Dothideomycetes	o__Pleosporales	f__Cucurbitariaceae	g__Pyrenochaeta	s__Pyrenochaeta_sp	OTU1930	25	8.92602e-05	0.333333
d__Eukaryota	k__Fungi	p__Ascomycota	c__Leotiomycetes	o__unclassified_c__Leotiomycetes	f__unclassified_c__Leotiomycetes	g__unclassified_c__Leotiomycetes	s__unclassified_c__Leotiomycetes	OTU834	5	1.7852e-05	0.111111
d__Eukaryota	k__Fungi	p__Ascomycota	c__Eurotiomycetes	o__Eurotiales	f__Aspergillaceae	g__Aspergillus	s__Aspergillus_penicillioides	OTU1345	1	3.57041e-06	0.111111
d__Eukaryota	k__Fungi	p__Basidiomycota	c__Microbotryomycetes	o__Microbotryomycetes_ord_Incertae_sedis	f__Chrysozymaceae	g__Pseudohyphozyma	s__Pseudohyphozyma_pustula	OTU212	8	2.85633e-05	0.333333
d__Eukaryota	k__Fungi	p__Glomeromycota	c__Glomeromycetes	o__Glomerales	f__Glomeraceae	g__unclassified_f__Glomeraceae	s__unclassified_f__Glomeraceae	OTU922	105	0.000374893	0.222222
d__Eukaryota	k__Fungi	p__Basidiomycota	c__Tremellomycetes	o__Trichosporonales	f__Trichosporonaceae	g__Cutaneotrichosporon	s__Cutaneotrichosporon_cutaneum	OTU617	2	7.14082e-06	0.111111
d__Eukaryota	k__Fungi	p__Ascomycota	c__unclassified_p__Ascomycota	o__unclassified_p__Ascomycota	f__unclassified_p__Ascomycota	g__unclassified_p__Ascomycota	s__unclassified_p__Ascomycota	OTU113	269	0.00096044	0.333333
d__Eukaryota	k__Fungi	p__Ascomycota	c__unclassified_p__Ascomycota	o__unclassified_p__Ascomycota	f__unclassified_p__Ascomycota	g__unclassified_p__Ascomycota	s__unclassified_p__Ascomycota	OTU81	1	3.57041e-06	0.111111
d__Eukaryota	k__Fungi	p__Ascomycota	c__Eurotiomycetes	o__Chaetothyriales	f__Chaetothyriales_fam_Incertae_sedis	g__Strelitziana	s__Strelitziana_eucalypti	OTU387	18	6.42674e-05	0.222222
d__Eukaryota	k__Fungi	p__Ascomycota	c__Sordariomycetes	o__Diaporthales	f__Diaporthaceae	g__Diaporthe	s__Diaporthe_nobilis	OTU796	31	0.000110683	0.444444
d__Eukaryota	k__Fungi	p__Ascomycota	c__Sordariomycetes	o__Xylariales	f__Xylariaceae	g__Xylaria	s__Xylaria_ochraceostroma	OTU826	3	1.07112e-05	0.111111
d__Eukaryota	k__Fungi	p__Ascomycota	c__Sordariomycetes	o__Hypocreales	f__unclassified_o__Hypocreales	g__unclassified_o__Hypocreales	s__unclassified_o__Hypocreales	OTU1318	1	3.57041e-06	0.111111
d__Eukaryota	k__Fungi	p__Basidiomycota	c__Tremellomycetes	o__Trichosporonales	f__Trichosporonaceae	g__Trichosporon	s__Trichosporon_coremiiforme	OTU1519	107	0.000382034	0.666667
d__Eukaryota	k__Fungi	p__Ascomycota	c__Dothideomycetes	o__Capnodiales	f__Mycosphaerellaceae	g__Cercospora	s__unclassified_g__Cercospora	OTU1530	3	1.07112e-05	0.333333
d__Eukaryota	k__Fungi	p__Ascomycota	c__Eurotiomycetes	o__Chaetothyriales	f__Herpotrichiellaceae	g__Cladophialophora	s__unclassified_g__Cladophialophora	OTU1245	7	2.49929e-05	0.222222
d__Eukaryota	k__Fungi	p__Ascomycota	c__Dothideomycetes	o__Capnodiales	f__Neodevriesiaceae	g__Neodevriesia	s__unclassified_g__Neodevriesia	OTU1380	8	2.85633e-05	0.111111
d__Eukaryota	k__Fungi	p__Ascomycota	c__Dothideomycetes	o__Capnodiales	f__Capnodiaceae	g__Capnodium	s__Capnodium_coffeae	OTU1074	307	0.00109612	0.333333
d__Eukaryota	k__Fungi	p__Ascomycota	c__Eurotiomycetes	o__Chaetothyriales	f__Herpotrichiellaceae	g__Cladophialophora	s__Cladophialophora_sp	OTU904	161	0.000574836	0.333333
d__Eukaryota	k__Fungi	p__Basidiomycota	c__Tremellomycetes	o__Tremellales	f__Cuniculitremaceae	g__Kockovaella	s__unclassified_g__Kockovaella	OTU1405	3	1.07112e-05	0.111111
d__Eukaryota	k__Fungi	p__Ascomycota	c__Eurotiomycetes	o__Chaetothyriales	f__Trichomeriaceae	g__unclassified_f__Trichomeriaceae	s__Trichomeriaceae_sp	OTU1266	2	7.14082e-06	0.111111
d__Eukaryota	k__Fungi	p__Ascomycota	c__Sordariomycetes	o__Xylariales	f__Apiosporaceae	g__Arthrinium	s__Arthrinium_malaysianum	OTU852	23	8.21194e-05	0.222222
d__Eukaryota	k__Fungi	p__Ascomycota	c__Sordariomycetes	o__Xylariales	f__Xylariaceae	g__Xylaria	s__Xylaria_hypoxylon	OTU1667	5	1.7852e-05	0.111111
d__Eukaryota	k__Fungi	p__Ascomycota	c__unclassified_p__Ascomycota	o__unclassified_p__Ascomycota	f__unclassified_p__Ascomycota	g__unclassified_p__Ascomycota	s__unclassified_p__Ascomycota	OTU1433	2	7.14082e-06	0.111111
d__Eukaryota	k__Fungi	p__Ascomycota	c__Sordariomycetes	o__Glomerellales	f__Glomerellaceae	g__Colletotrichum	s__Colletotrichum_truncatum	OTU1488	2365	0.00844402	0.666667
d__Eukaryota	k__Fungi	p__Ascomycota	c__Dothideomycetes	o__Venturiales	f__Sympoventuriaceae	g__Melnikomyces	s__Melnikomyces_vietnamensis	OTU1412	1	3.57041e-06	0.111111
d__Eukaryota	k__Fungi	p__Ascomycota	c__unclassified_p__Ascomycota	o__unclassified_p__Ascomycota	f__unclassified_p__Ascomycota	g__unclassified_p__Ascomycota	s__unclassified_p__Ascomycota	OTU591	612	0.00218509	0.333333
d__Eukaryota	k__Fungi	p__Ascomycota	c__Dothideomycetes	o__Pleosporales	f__Tetraplosphaeriaceae	g__Tetraplosphaeria	s__unclassified_g__Tetraplosphaeria	OTU1206	6	2.14225e-05	0.111111
d__Eukaryota	k__Fungi	p__Ascomycota	c__Sordariomycetes	o__Xylariales	f__unclassified_o__Xylariales	g__unclassified_o__Xylariales	s__unclassified_o__Xylariales	OTU1232	8	2.85633e-05	0.222222
d__Eukaryota	k__Fungi	p__Ascomycota	c__Sordariomycetes	o__Glomerellales	f__Glomerellaceae	g__Colletotrichum	s__Colletotrichum_boninense	OTU818	28	9.99714e-05	0.555556
d__Eukaryota	k__Fungi	p__Ascomycota	c__Sordariomycetes	o__Xylariales	f__Sporocadaceae	g__Neopestalotiopsis	s__Neopestalotiopsis_protearum	OTU653	6	2.14225e-05	0.111111
d__Eukaryota	k__Fungi	p__Ascomycota	c__Eurotiomycetes	o__Chaetothyriales	f__unclassified_o__Chaetothyriales	g__unclassified_o__Chaetothyriales	s__unclassified_o__Chaetothyriales	OTU506	7	2.49929e-05	0.111111
d__Eukaryota	k__Fungi	p__Basidiomycota	c__Agaricomycetes	o__Auriculariales	f__unclassified_o__Auriculariales	g__unclassified_o__Auriculariales	s__unclassified_o__Auriculariales	OTU1209	3	1.07112e-05	0.111111
d__Eukaryota	k__Fungi	p__Ascomycota	c__Sordariomycetes	o__unclassified_c__Sordariomycetes	f__unclassified_c__Sordariomycetes	g__unclassified_c__Sordariomycetes	s__unclassified_c__Sordariomycetes	OTU466	1	3.57041e-06	0.111111
d__Eukaryota	k__Fungi	p__unclassified_k__Fungi	c__unclassified_k__Fungi	o__unclassified_k__Fungi	f__unclassified_k__Fungi	g__unclassified_k__Fungi	s__unclassified_k__Fungi	OTU437	6	2.14225e-05	0.222222
d__Eukaryota	k__Fungi	p__unclassified_k__Fungi	c__unclassified_k__Fungi	o__unclassified_k__Fungi	f__unclassified_k__Fungi	g__unclassified_k__Fungi	s__unclassified_k__Fungi	OTU1344	3	1.07112e-05	0.111111
d__Eukaryota	k__Fungi	p__unclassified_k__Fungi	c__unclassified_k__Fungi	o__unclassified_k__Fungi	f__unclassified_k__Fungi	g__unclassified_k__Fungi	s__unclassified_k__Fungi	OTU1340	35	0.000124964	0.111111
d__Eukaryota	k__Fungi	p__Ascomycota	c__Eurotiomycetes	o__Chaetothyriales	f__Chaetothyriales_fam_Incertae_sedis	g__Strelitziana	s__unclassified_g__Strelitziana	OTU1281	2	7.14082e-06	0.222222
d__Eukaryota	k__Fungi	p__Ascomycota	c__unclassified_p__Ascomycota	o__unclassified_p__Ascomycota	f__unclassified_p__Ascomycota	g__unclassified_p__Ascomycota	s__unclassified_p__Ascomycota	OTU967	7	2.49929e-05	0.222222
d__Eukaryota	k__Fungi	p__Ascomycota	c__unclassified_p__Ascomycota	o__unclassified_p__Ascomycota	f__unclassified_p__Ascomycota	g__unclassified_p__Ascomycota	s__unclassified_p__Ascomycota	OTU964	3	1.07112e-05	0.111111
d__Eukaryota	k__Fungi	p__Ascomycota	c__Saccharomycetes	o__Saccharomycetales	f__Phaffomycetaceae	g__Wickerhamomyces	s__Wickerhamomyces_anomalus	OTU2129	117	0.000417738	0.444444
d__Eukaryota	k__Fungi	p__Ascomycota	c__Sordariomycetes	o__Hypocreales	f__Hypocreales_fam_Incertae_sedis	g__Acremonium	s__Acremonium_sclerotigenum	OTU761	6777	0.0241967	0.555556
d__Eukaryota	k__Fungi	p__Ascomycota	c__Sordariomycetes	o__Xylariales	f__Xylariaceae	g__Hypoxylon	s__unclassified_g__Hypoxylon	OTU2094	19	6.78378e-05	0.444444
d__Eukaryota	k__Fungi	p__Ascomycota	c__Dothideomycetes	o__Pleosporales	f__Lophiotremataceae	g__Lophiotrema	s__Lophiotrema_sp	OTU1740	2	7.14082e-06	0.111111
d__Eukaryota	k__Fungi	p__Basidiomycota	c__Tremellomycetes	o__Tremellales	f__Bulleribasidiaceae	g__Bulleribasidium	s__Bulleribasidium_foliicola	OTU1390	8	2.85633e-05	0.222222
d__Eukaryota	k__Fungi	p__Ascomycota	c__Sordariomycetes	o__Hypocreales	f__Hypocreales_fam_Incertae_sedis	g__Acremonium	s__Acremonium_stromaticum	OTU1404	2	7.14082e-06	0.111111
d__Eukaryota	k__Fungi	p__Ascomycota	c__Sordariomycetes	o__Xylariales	f__Xylariaceae	g__Emarcea	s__unclassified_g__Emarcea	OTU1447	4	1.42816e-05	0.111111
d__Eukaryota	k__Fungi	p__Ascomycota	c__Dothideomycetes	o__Capnodiales	f__unclassified_o__Capnodiales	g__unclassified_o__Capnodiales	s__unclassified_o__Capnodiales	OTU473	1	3.57041e-06	0.111111
d__Eukaryota	k__Fungi	p__Ascomycota	c__Sordariomycetes	o__Trichosphaeriales	f__Trichosphaeriaceae	g__Nigrospora	s__Nigrospora_oryzae	OTU1078	159	0.000567695	0.444444
d__Eukaryota	k__Fungi	p__Ascomycota	c__Eurotiomycetes	o__Eurotiales	f__Aspergillaceae	g__Aspergillus	s__Aspergillus_minisclerotigenes	OTU1490	234	0.000835476	0.555556
d__Eukaryota	k__Fungi	p__Ascomycota	c__Sordariomycetes	o__Diaporthales	f__Diaporthaceae	g__Diaporthe	s__unclassified_g__Diaporthe	OTU994	7	2.49929e-05	0.111111
d__Eukaryota	k__Fungi	p__Basidiomycota	c__Tremellomycetes	o__Tremellales	f__Bulleribasidiaceae	g__Bulleribasidium	s__Bulleribasidium_variabile	OTU436	13	4.64153e-05	0.222222
d__Eukaryota	k__Fungi	p__Ascomycota	c__Eurotiomycetes	o__Chaetothyriales	f__Cyphellophoraceae	g__Cyphellophora	s__Cyphellophora_pluriseptata	OTU440	1	3.57041e-06	0.111111
d__Eukaryota	k__Fungi	p__Ascomycota	c__Orbiliomycetes	o__unclassified_c__Orbiliomycetes	f__unclassified_c__Orbiliomycetes	g__unclassified_c__Orbiliomycetes	s__Orbiliomycetes_sp	OTU1101	111	0.000396315	0.333333
d__Eukaryota	k__Fungi	p__Ascomycota	c__Eurotiomycetes	o__Chaetothyriales	f__Cyphellophoraceae	g__Cyphellophora	s__Cyphellophora_pauciseptata	OTU1052	79	0.000282062	0.333333
d__Eukaryota	k__Fungi	p__Ascomycota	c__Eurotiomycetes	o__Chaetothyriales	f__Cyphellophoraceae	g__Cyphellophora	s__unclassified_g__Cyphellophora	OTU446	18	6.42674e-05	0.333333
d__Eukaryota	k__Fungi	p__Ascomycota	c__Lecanoromycetes	o__unclassified_c__Lecanoromycetes	f__unclassified_c__Lecanoromycetes	g__unclassified_c__Lecanoromycetes	s__unclassified_c__Lecanoromycetes	OTU1248	2	7.14082e-06	0.111111
d__Eukaryota	k__Fungi	p__Ascomycota	c__Sordariomycetes	o__Hypocreales	f__Hypocreales_fam_Incertae_sedis	g__Acremonium	s__unclassified_g__Acremonium	OTU1474	61	0.000217795	0.111111
d__Eukaryota	k__Fungi	p__Basidiomycota	c__Microbotryomycetes	o__Microbotryomycetes_ord_Incertae_sedis	f__Chrysozymaceae	g__Slooffia	s__Slooffia_tsugae	OTU1244	7	2.49929e-05	0.111111
d__Eukaryota	k__Fungi	p__Ascomycota	c__unclassified_p__Ascomycota	o__unclassified_p__Ascomycota	f__unclassified_p__Ascomycota	g__unclassified_p__Ascomycota	s__unclassified_p__Ascomycota	OTU101	44	0.000157098	0.222222
d__Eukaryota	k__Fungi	p__Ascomycota	c__Sordariomycetes	o__Xylariales	f__Xylariales_fam_Incertae_sedis	g__Robillarda	s__unclassified_g__Robillarda	OTU1418	67	0.000239217	0.111111
d__Eukaryota	k__Fungi	p__Ascomycota	c__Dothideomycetes	o__Venturiales	f__Sympoventuriaceae	g__Scolecobasidium	s__Scolecobasidium_constrictum	OTU374	1	3.57041e-06	0.111111
d__Eukaryota	k__Fungi	p__Ascomycota	c__Sordariomycetes	o__Glomerellales	f__Glomerellaceae	g__Colletotrichum	s__Colletotrichum_guajavae	OTU630	54	0.000192802	0.555556
d__Eukaryota	k__Fungi	p__Ascomycota	c__Sordariomycetes	o__Glomerellales	f__Glomerellaceae	g__Colletotrichum	s__unclassified_g__Colletotrichum	OTU619	66	0.000235647	0.666667
d__Eukaryota	k__Fungi	p__Ascomycota	c__Dothideomycetes	o__Pleosporales	f__Didymellaceae	g__Leptosphaerulina	s__unclassified_g__Leptosphaerulina	OTU153	573	0.00204584	0.666667
d__Eukaryota	k__Fungi	p__Ascomycota	c__Dothideomycetes	o__Pleosporales	f__Didymellaceae	g__unclassified_f__Didymellaceae	s__unclassified_f__Didymellaceae	OTU504	344	0.00122822	0.333333
d__Eukaryota	k__Fungi	p__Ascomycota	c__unclassified_p__Ascomycota	o__unclassified_p__Ascomycota	f__unclassified_p__Ascomycota	g__unclassified_p__Ascomycota	s__unclassified_p__Ascomycota	OTU1294	4	1.42816e-05	0.222222
d__Eukaryota	k__Fungi	p__Ascomycota	c__unclassified_p__Ascomycota	o__unclassified_p__Ascomycota	f__unclassified_p__Ascomycota	g__unclassified_p__Ascomycota	s__unclassified_p__Ascomycota	OTU1292	3	1.07112e-05	0.222222
d__Eukaryota	k__Fungi	p__Ascomycota	c__Eurotiomycetes	o__Chaetothyriales	f__Cyphellophoraceae	g__Cyphellophora	s__Cyphellophora_fusarioides	OTU110	3	1.07112e-05	0.111111
d__Eukaryota	k__Fungi	p__Ascomycota	c__Sordariomycetes	o__Xylariales	f__Xylariaceae	g__unclassified_f__Xylariaceae	s__unclassified_f__Xylariaceae	OTU1335	1	3.57041e-06	0.111111
d__Eukaryota	k__Fungi	p__Basidiomycota	c__Agaricomycetes	o__Tremellodendropsidales	f__unclassified_o__Tremellodendropsidales	g__unclassified_o__Tremellodendropsidales	s__Tremellodendropsidales_sp	OTU1115	2	7.14082e-06	0.111111
d__Eukaryota	k__Fungi	p__Basidiomycota	c__Agaricomycetes	o__Agaricales	f__Strophariaceae	g__Psilocybe	s__unclassified_g__Psilocybe	OTU1222	44	0.000157098	0.333333
d__Eukaryota	k__Fungi	p__Ascomycota	c__Sordariomycetes	o__Hypocreales	f__Nectriaceae	g__unclassified_f__Nectriaceae	s__unclassified_f__Nectriaceae	OTU924	131	0.000467724	0.111111
d__Eukaryota	k__Fungi	p__Ascomycota	c__Sordariomycetes	o__Magnaporthales	f__Magnaporthaceae	g__unclassified_f__Magnaporthaceae	s__unclassified_f__Magnaporthaceae	OTU1389	3	1.07112e-05	0.111111
d__Eukaryota	k__Fungi	p__Basidiomycota	c__Agaricomycetes	o__Trechisporales	f__Hydnodontaceae	g__Trechispora	s__Trechispora_sp	OTU1184	2	7.14082e-06	0.111111
d__Eukaryota	k__Fungi	p__Ascomycota	c__Saccharomycetes	o__Saccharomycetales	f__Saccharomycetaceae	g__Issatchenkia	s__Issatchenkia_orientalis	OTU916	240	0.000856898	0.666667
d__Eukaryota	k__Fungi	p__Ascomycota	c__unclassified_p__Ascomycota	o__unclassified_p__Ascomycota	f__unclassified_p__Ascomycota	g__unclassified_p__Ascomycota	s__unclassified_p__Ascomycota	OTU1421	1	3.57041e-06	0.111111
d__Eukaryota	k__Fungi	p__Ascomycota	c__Eurotiomycetes	o__Chaetothyriales	f__Herpotrichiellaceae	g__Cladophialophora	s__Cladophialophora_chaetospira	OTU898	2683	0.00957941	0.666667
d__Eukaryota	k__Fungi	p__Ascomycota	c__Eurotiomycetes	o__Chaetothyriales	f__Trichomeriaceae	g__Trichomerium	s__unclassified_g__Trichomerium	OTU1477	8	2.85633e-05	0.111111
d__Eukaryota	k__Fungi	p__Ascomycota	c__Eurotiomycetes	o__Chaetothyriales	f__Herpotrichiellaceae	g__Cladophialophora	s__Cladophialophora_sp	OTU869	65	0.000232077	0.222222
d__Eukaryota	k__Fungi	p__Ascomycota	c__Sordariomycetes	o__Hypocreales	f__unclassified_o__Hypocreales	g__unclassified_o__Hypocreales	s__unclassified_o__Hypocreales	OTU1300	5	1.7852e-05	0.111111
d__Eukaryota	k__Fungi	p__unclassified_k__Fungi	c__unclassified_k__Fungi	o__unclassified_k__Fungi	f__unclassified_k__Fungi	g__unclassified_k__Fungi	s__unclassified_k__Fungi	OTU1374	5	1.7852e-05	0.111111
d__Eukaryota	k__Fungi	p__Ascomycota	c__Sordariomycetes	o__Hypocreales	f__unclassified_o__Hypocreales	g__unclassified_o__Hypocreales	s__unclassified_o__Hypocreales	OTU1307	4	1.42816e-05	0.111111
d__Eukaryota	k__Fungi	p__Ascomycota	c__Dothideomycetes	o__Pleosporales	f__unclassified_o__Pleosporales	g__unclassified_o__Pleosporales	s__unclassified_o__Pleosporales	OTU1054	13	4.64153e-05	0.222222
d__Eukaryota	k__Fungi	p__Basidiomycota	c__Microbotryomycetes	o__Sporidiobolales	f__Sporidiobolaceae	g__Rhodosporidiobolus	s__Rhodosporidiobolus_ruineniae	OTU816	12	4.28449e-05	0.111111
d__Eukaryota	k__Fungi	p__Ascomycota	c__Dothideomycetes	o__Pleosporales	f__unclassified_o__Pleosporales	g__unclassified_o__Pleosporales	s__unclassified_o__Pleosporales	OTU1120	166	0.000592688	0.222222
d__Eukaryota	k__Fungi	p__Ascomycota	c__Dothideomycetes	o__Pleosporales	f__unclassified_o__Pleosporales	g__unclassified_o__Pleosporales	s__unclassified_o__Pleosporales	OTU1127	6	2.14225e-05	0.111111
d__Eukaryota	k__Fungi	p__Ascomycota	c__Eurotiomycetes	o__Chaetothyriales	f__Cyphellophoraceae	g__Cyphellophora	s__Cyphellophora_phyllostachydis	OTU950	90	0.000321337	0.555556
d__Eukaryota	k__Fungi	p__unclassified_k__Fungi	c__unclassified_k__Fungi	o__unclassified_k__Fungi	f__unclassified_k__Fungi	g__unclassified_k__Fungi	s__unclassified_k__Fungi	OTU278	1	3.57041e-06	0.111111
d__Eukaryota	k__Fungi	p__Ascomycota	c__Sordariomycetes	o__Glomerellales	f__Glomerellaceae	g__Colletotrichum	s__unclassified_g__Colletotrichum	OTU1134	117	0.000417738	0.666667
d__Eukaryota	k__Fungi	p__Ascomycota	c__Dothideomycetes	o__Capnodiales	f__unclassified_o__Capnodiales	g__unclassified_o__Capnodiales	s__unclassified_o__Capnodiales	OTU1518	1	3.57041e-06	0.111111
d__Eukaryota	k__Fungi	p__Ascomycota	c__Eurotiomycetes	o__Eurotiales	f__Trichocomaceae	g__Talaromyces	s__Talaromyces_subaurantiacus	OTU1178	173	0.000617681	0.222222
d__Eukaryota	k__Fungi	p__Ascomycota	c__Dothideomycetes	o__Capnodiales	f__Mycosphaerellaceae	g__Cercospora	s__unclassified_g__Cercospora	OTU806	1	3.57041e-06	0.111111
d__Eukaryota	k__Fungi	p__Ascomycota	c__Sordariomycetes	o__Xylariales	f__Xylariaceae	g__unclassified_f__Xylariaceae	s__unclassified_f__Xylariaceae	OTU1261	4	1.42816e-05	0.222222
d__Eukaryota	k__Fungi	p__Basidiomycota	c__Agaricomycetes	o__Agaricales	f__Psathyrellaceae	g__Lacrymaria	s__Lacrymaria_lacrymabunda	OTU138	208	0.000742645	0.333333
d__Eukaryota	k__Fungi	p__Ascomycota	c__Sordariomycetes	o__Xylariales	f__unclassified_o__Xylariales	g__unclassified_o__Xylariales	s__unclassified_o__Xylariales	OTU1080	344	0.00122822	0.333333
d__Eukaryota	k__Fungi	p__Basidiomycota	c__Agaricomycetes	o__Agaricales	f__Psathyrellaceae	g__Coprinellus	s__Coprinellus_disseminatus	OTU474	1	3.57041e-06	0.111111
d__Eukaryota	k__Fungi	p__Basidiomycota	c__Agaricomycetes	o__Polyporales	f__Ganodermataceae	g__Ganoderma	s__unclassified_g__Ganoderma	OTU943	9	3.21337e-05	0.222222
d__Eukaryota	k__Fungi	p__Ascomycota	c__Leotiomycetes	o__Helotiales	f__Dermateaceae	g__Trimmatostroma	s__Trimmatostroma_cordae	OTU360	6	2.14225e-05	0.222222
d__Eukaryota	k__Fungi	p__Ascomycota	c__Sordariomycetes	o__Hypocreales	f__Clavicipitaceae	g__Metarhizium	s__Metarhizium_marquandii	OTU1363	2	7.14082e-06	0.111111
d__Eukaryota	k__Fungi	p__Ascomycota	c__Sordariomycetes	o__Hypocreales	f__Bionectriaceae	g__Clonostachys	s__Clonostachys_sp	OTU2011	7	2.49929e-05	0.111111
d__Eukaryota	k__Fungi	p__Basidiomycota	c__Tremellomycetes	o__Tremellales	f__Bulleribasidiaceae	g__Hannaella	s__unclassified_g__Hannaella	OTU1121	11	3.92745e-05	0.333333
d__Eukaryota	k__Fungi	p__Ascomycota	c__Sordariomycetes	o__Xylariales	f__Xylariaceae	g__Xylaria	s__unclassified_g__Xylaria	OTU1278	5	1.7852e-05	0.111111
d__Eukaryota	k__Fungi	p__Ascomycota	c__Sordariomycetes	o__Sordariales	f__Chaetomiaceae	g__unclassified_f__Chaetomiaceae	s__unclassified_f__Chaetomiaceae	OTU1045	14	4.99857e-05	0.111111
d__Eukaryota	k__Fungi	p__Ascomycota	c__Lecanoromycetes	o__Lecanorales	f__Ramalinaceae	g__Bacidia	s__unclassified_g__Bacidia	OTU1336	12	4.28449e-05	0.111111
d__Eukaryota	k__Fungi	p__Ascomycota	c__Sordariomycetes	o__Xylariales	f__Xylariaceae	g__unclassified_f__Xylariaceae	s__unclassified_f__Xylariaceae	OTU777	2	7.14082e-06	0.111111
d__Eukaryota	k__Fungi	p__Ascomycota	c__Sordariomycetes	o__Hypocreales	f__Cordycipitaceae	g__Cordyceps	s__Cordyceps_militaris	OTU848	25	8.92602e-05	0.111111
d__Eukaryota	k__Fungi	p__Ascomycota	c__Leotiomycetes	o__Helotiales	f__unclassified_o__Helotiales	g__unclassified_o__Helotiales	s__unclassified_o__Helotiales	OTU857	4	1.42816e-05	0.111111
d__Eukaryota	k__Fungi	p__Ascomycota	c__Sordariomycetes	o__unclassified_c__Sordariomycetes	f__unclassified_c__Sordariomycetes	g__unclassified_c__Sordariomycetes	s__unclassified_c__Sordariomycetes	OTU1419	4	1.42816e-05	0.111111
d__Eukaryota	k__Fungi	p__Glomeromycota	c__Glomeromycetes	o__Diversisporales	f__Diversisporales_fam_Incertae_sedis	g__Entrophospora	s__Entrophospora_sp	OTU1298	13	4.64153e-05	0.222222
d__Eukaryota	k__Fungi	p__Basidiomycota	c__unclassified_p__Basidiomycota	o__unclassified_p__Basidiomycota	f__unclassified_p__Basidiomycota	g__unclassified_p__Basidiomycota	s__unclassified_p__Basidiomycota	OTU524	7	2.49929e-05	0.111111
d__Eukaryota	k__Fungi	p__Ascomycota	c__Sordariomycetes	o__Hypocreales	f__Nectriaceae	g__Calonectria	s__unclassified_g__Calonectria	OTU821	7	2.49929e-05	0.222222
d__Eukaryota	k__Fungi	p__Ascomycota	c__Sordariomycetes	o__Sordariales	f__Sordariales_fam_Incertae_sedis	g__Rhexodenticula	s__Rhexodenticula_sp	OTU863	78	0.000278492	0.111111
d__Eukaryota	k__Fungi	p__Ascomycota	c__Eurotiomycetes	o__Chaetothyriales	f__Herpotrichiellaceae	g__unclassified_f__Herpotrichiellaceae	s__unclassified_f__Herpotrichiellaceae	OTU313	18	6.42674e-05	0.111111
d__Eukaryota	k__Fungi	p__Ascomycota	c__Eurotiomycetes	o__Chaetothyriales	f__Herpotrichiellaceae	g__Exophiala	s__unclassified_g__Exophiala	OTU1338	3	1.07112e-05	0.111111
d__Eukaryota	k__Fungi	p__Ascomycota	c__Sordariomycetes	o__Xylariales	f__Xylariaceae	g__unclassified_f__Xylariaceae	s__unclassified_f__Xylariaceae	OTU1468	2	7.14082e-06	0.111111
d__Eukaryota	k__Fungi	p__Ascomycota	c__Dothideomycetes	o__Pleosporales	f__Didymellaceae	g__unclassified_f__Didymellaceae	s__unclassified_f__Didymellaceae	OTU1498	15	5.35561e-05	0.333333
d__Eukaryota	k__Fungi	p__Ascomycota	c__Sordariomycetes	o__Xylariales	f__Xylariaceae	g__unclassified_f__Xylariaceae	s__unclassified_f__Xylariaceae	OTU1460	1	3.57041e-06	0.111111
d__Eukaryota	k__Fungi	p__Ascomycota	c__Eurotiomycetes	o__Chaetothyriales	f__Chaetothyriales_fam_Incertae_sedis	g__Strelitziana	s__unclassified_g__Strelitziana	OTU489	39	0.000139246	0.333333
d__Eukaryota	k__Fungi	p__Ascomycota	c__Eurotiomycetes	o__Chaetothyriales	f__Herpotrichiellaceae	g__Cladophialophora	s__Cladophialophora_chaetospira	OTU1237	88	0.000314196	0.111111
d__Eukaryota	k__Fungi	p__unclassified_k__Fungi	c__unclassified_k__Fungi	o__unclassified_k__Fungi	f__unclassified_k__Fungi	g__unclassified_k__Fungi	s__unclassified_k__Fungi	OTU1214	5	1.7852e-05	0.111111
d__Eukaryota	k__Fungi	p__Ascomycota	c__Sordariomycetes	o__Xylariales	f__Xylariaceae	g__Hypoxylon	s__Hypoxylon_fendleri	OTU2068	12	4.28449e-05	0.444444
d__Eukaryota	k__Fungi	p__unclassified_k__Fungi	c__unclassified_k__Fungi	o__unclassified_k__Fungi	f__unclassified_k__Fungi	g__unclassified_k__Fungi	s__unclassified_k__Fungi	OTU1210	1	3.57041e-06	0.111111
d__Eukaryota	k__Fungi	p__Basidiomycota	c__Agaricomycetes	o__Agaricales	f__Cortinariaceae	g__Gymnopilus	s__unclassified_g__Gymnopilus	OTU1928	5	1.7852e-05	0.111111
d__Eukaryota	k__Fungi	p__Ascomycota	c__Sordariomycetes	o__Diaporthales	f__Diaporthaceae	g__Diaporthe	s__unclassified_g__Diaporthe	OTU1140	79	0.000282062	0.666667
d__Eukaryota	k__Fungi	p__Basidiomycota	c__Agaricomycetes	o__Cantharellales	f__Ceratobasidiaceae	g__unclassified_f__Ceratobasidiaceae	s__unclassified_f__Ceratobasidiaceae	OTU901	885	0.00315981	0.333333
d__Eukaryota	k__Fungi	p__Basidiomycota	c__Agaricomycetes	o__Agaricales	f__Psathyrellaceae	g__Coprinellus	s__Coprinellus_disseminatus	OTU2036	8	2.85633e-05	0.222222
d__Eukaryota	k__Fungi	p__Ascomycota	c__Eurotiomycetes	o__Chaetothyriales	f__Cyphellophoraceae	g__Cyphellophora	s__unclassified_g__Cyphellophora	OTU1173	14	4.99857e-05	0.111111
d__Eukaryota	k__Fungi	p__Ascomycota	c__Saccharomycetes	o__Saccharomycetales	f__Phaffomycetaceae	g__Wickerhamomyces	s__Wickerhamomyces_anomalus	OTU897	254	0.000906884	0.444444
d__Eukaryota	k__Fungi	p__Ascomycota	c__Dothideomycetes	o__Capnodiales	f__Mycosphaerellaceae	g__Sphaerulina	s__unclassified_g__Sphaerulina	OTU819	1	3.57041e-06	0.111111
d__Eukaryota	k__Fungi	p__Ascomycota	c__Dothideomycetes	o__Capnodiales	f__Teratosphaeriaceae	g__Devriesia	s__Devriesia_strelitziicola	OTU1009	3	1.07112e-05	0.111111
d__Eukaryota	k__Fungi	p__Ascomycota	c__Sordariomycetes	o__unclassified_c__Sordariomycetes	f__unclassified_c__Sordariomycetes	g__unclassified_c__Sordariomycetes	s__unclassified_c__Sordariomycetes	OTU336	1	3.57041e-06	0.111111
d__Eukaryota	k__Fungi	p__Ascomycota	c__Sordariomycetes	o__Sordariales	f__Lasiosphaeriaceae	g__Cercophora	s__Cercophora_thailandica	OTU1102	10	3.57041e-05	0.333333
d__Eukaryota	k__Fungi	p__Ascomycota	c__Sordariomycetes	o__Diaporthales	f__Diaporthaceae	g__Diaporthe	s__unclassified_g__Diaporthe	OTU965	14	4.99857e-05	0.222222
d__Eukaryota	k__Fungi	p__Ascomycota	c__Dothideomycetes	o__Pleosporales	f__Lophiostomataceae	g__Lophiostoma	s__Lophiostoma_cynaroidis	OTU933	2	7.14082e-06	0.111111
d__Eukaryota	k__Fungi	p__unclassified_k__Fungi	c__unclassified_k__Fungi	o__unclassified_k__Fungi	f__unclassified_k__Fungi	g__unclassified_k__Fungi	s__unclassified_k__Fungi	OTU961	3	1.07112e-05	0.111111
d__Eukaryota	k__Fungi	p__Basidiomycota	c__Agaricostilbomycetes	o__Agaricostilbales	f__Chionosphaeraceae	g__Kurtzmanomyces	s__unclassified_g__Kurtzmanomyces	OTU1918	5	1.7852e-05	0.222222
d__Eukaryota	k__Fungi	p__Ascomycota	c__Eurotiomycetes	o__Chaetothyriales	f__Herpotrichiellaceae	g__unclassified_f__Herpotrichiellaceae	s__unclassified_f__Herpotrichiellaceae	OTU1145	66	0.000235647	0.333333
d__Eukaryota	k__Fungi	p__Glomeromycota	c__Glomeromycetes	o__Glomerales	f__Glomeraceae	g__unclassified_f__Glomeraceae	s__unclassified_f__Glomeraceae	OTU879	4	1.42816e-05	0.111111
d__Eukaryota	k__Fungi	p__Basidiomycota	c__Ustilaginomycetes	o__Ustilaginales	f__Ustilaginaceae	g__Moesziomyces	s__Moesziomyces_sp	OTU1483	9	3.21337e-05	0.222222
d__Eukaryota	k__Fungi	p__unclassified_k__Fungi	c__unclassified_k__Fungi	o__unclassified_k__Fungi	f__unclassified_k__Fungi	g__unclassified_k__Fungi	s__unclassified_k__Fungi	OTU1119	7	2.49929e-05	0.111111
d__Eukaryota	k__Fungi	p__Basidiomycota	c__Agaricomycetes	o__Agaricales	f__Entolomataceae	g__Clitopilus	s__Clitopilus_kamaka	OTU1343	2	7.14082e-06	0.111111
d__Eukaryota	k__Fungi	p__Ascomycota	c__Sordariomycetes	o__Sordariales	f__Lasiosphaeriaceae	g__Cercophora	s__unclassified_g__Cercophora	OTU566	16	5.71265e-05	0.333333
d__Eukaryota	k__Fungi	p__Ascomycota	c__Sordariomycetes	o__Sordariales	f__Lasiosphaeriaceae	g__unclassified_f__Lasiosphaeriaceae	s__unclassified_f__Lasiosphaeriaceae	OTU1409	2	7.14082e-06	0.111111
d__Eukaryota	k__Fungi	p__Basidiomycota	c__unclassified_p__Basidiomycota	o__unclassified_p__Basidiomycota	f__unclassified_p__Basidiomycota	g__unclassified_p__Basidiomycota	s__unclassified_p__Basidiomycota	OTU1459	2	7.14082e-06	0.111111
d__Eukaryota	k__Fungi	p__Basidiomycota	c__Agaricostilbomycetes	o__Agaricostilbales	f__Agaricostilbaceae	g__Sterigmatomyces	s__Sterigmatomyces_sp	OTU892	112	0.000399886	0.333333
d__Eukaryota	k__Fungi	p__Ascomycota	c__Dothideomycetes	o__Dothideales	f__Aureobasidiaceae	g__Aureobasidium	s__Aureobasidium_proteae	OTU942	12	4.28449e-05	0.222222
d__Eukaryota	k__Fungi	p__Ascomycota	c__Eurotiomycetes	o__Chaetothyriales	f__Cyphellophoraceae	g__Cyphellophora	s__unclassified_g__Cyphellophora	OTU1002	202	0.000721223	0.333333
d__Eukaryota	k__Fungi	p__Ascomycota	c__Sordariomycetes	o__Sordariales	f__Sordariales_fam_Incertae_sedis	g__Conlarium	s__Conlarium_aquaticum	OTU885	3	1.07112e-05	0.111111
d__Eukaryota	k__Fungi	p__unclassified_k__Fungi	c__unclassified_k__Fungi	o__unclassified_k__Fungi	f__unclassified_k__Fungi	g__unclassified_k__Fungi	s__unclassified_k__Fungi	OTU632	1149	0.0041024	1
d__Eukaryota	k__Fungi	p__unclassified_k__Fungi	c__unclassified_k__Fungi	o__unclassified_k__Fungi	f__unclassified_k__Fungi	g__unclassified_k__Fungi	s__unclassified_k__Fungi	OTU634	2	7.14082e-06	0.222222
d__Eukaryota	k__Fungi	p__Ascomycota	c__Leotiomycetes	o__Helotiales	f__Leotiaceae	g__Gorgomyces	s__Gorgomyces_sp	OTU530	4	1.42816e-05	0.111111
d__Eukaryota	k__Fungi	p__Basidiomycota	c__Cystobasidiomycetes	o__Erythrobasidiales	f__Erythrobasidiaceae	g__Erythrobasidium	s__Erythrobasidium_sp	OTU1697	1	3.57041e-06	0.111111
d__Eukaryota	k__Fungi	p__Ascomycota	c__unclassified_p__Ascomycota	o__unclassified_p__Ascomycota	f__unclassified_p__Ascomycota	g__unclassified_p__Ascomycota	s__unclassified_p__Ascomycota	OTU1018	266	0.000949729	0.444444
d__Eukaryota	k__Fungi	p__Ascomycota	c__Sordariomycetes	o__Xylariales	f__Xylariaceae	g__Xylaria	s__Xylaria_longipes	OTU2021	1	3.57041e-06	0.111111
d__Eukaryota	k__Fungi	p__Ascomycota	c__Sordariomycetes	o__Hypocreales	f__Nectriaceae	g__Gibberella	s__Gibberella_intricans	OTU1515	5	1.7852e-05	0.333333
d__Eukaryota	k__Fungi	p__Ascomycota	c__Dothideomycetes	o__Pleosporales	f__Phaeosphaeriaceae	g__Ophiosphaerella	s__Ophiosphaerella_agrostidis	OTU2115	1	3.57041e-06	0.111111
d__Eukaryota	k__Fungi	p__Ascomycota	c__Sordariomycetes	o__Conioscyphales	f__Conioscyphaceae	g__Conioscypha	s__Conioscypha_sp	OTU1112	1	3.57041e-06	0.111111
d__Eukaryota	k__Fungi	p__Ascomycota	c__Eurotiomycetes	o__Chaetothyriales	f__Trichomeriaceae	g__unclassified_f__Trichomeriaceae	s__unclassified_f__Trichomeriaceae	OTU1377	4	1.42816e-05	0.111111
d__Eukaryota	k__Fungi	p__Ascomycota	c__Leotiomycetes	o__Helotiales	f__Helotiaceae	g__Tetracladium	s__unclassified_g__Tetracladium	OTU95	3	1.07112e-05	0.111111
d__Eukaryota	k__Fungi	p__Basidiomycota	c__unclassified_p__Basidiomycota	o__unclassified_p__Basidiomycota	f__unclassified_p__Basidiomycota	g__unclassified_p__Basidiomycota	s__unclassified_p__Basidiomycota	OTU1274	1	3.57041e-06	0.111111
d__Eukaryota	k__Fungi	p__Ascomycota	c__Sordariomycetes	o__unclassified_c__Sordariomycetes	f__unclassified_c__Sordariomycetes	g__unclassified_c__Sordariomycetes	s__unclassified_c__Sordariomycetes	OTU1956	3	1.07112e-05	0.111111
d__Eukaryota	k__Fungi	p__Ascomycota	c__Sordariomycetes	o__Xylariales	f__Xylariaceae	g__unclassified_f__Xylariaceae	s__unclassified_f__Xylariaceae	OTU949	3	1.07112e-05	0.111111
d__Eukaryota	k__Fungi	p__unclassified_k__Fungi	c__unclassified_k__Fungi	o__unclassified_k__Fungi	f__unclassified_k__Fungi	g__unclassified_k__Fungi	s__unclassified_k__Fungi	OTU1365	6	2.14225e-05	0.111111
d__Eukaryota	k__Fungi	p__Ascomycota	c__Eurotiomycetes	o__Chaetothyriales	f__Herpotrichiellaceae	g__Cladophialophora	s__Cladophialophora_chaetospira	OTU1429	61	0.000217795	0.222222
d__Eukaryota	k__Fungi	p__Ascomycota	c__Sordariomycetes	o__Xylariales	f__Xylariaceae	g__Hypoxylon	s__Hypoxylon_haematostroma	OTU1005	18	6.42674e-05	0.111111
d__Eukaryota	k__Fungi	p__Ascomycota	c__Sordariomycetes	o__Xylariales	f__Xylariaceae	g__Nemania	s__Nemania_diffusa	OTU1144	4	1.42816e-05	0.222222
d__Eukaryota	k__Fungi	p__Basidiomycota	c__Agaricomycetes	o__Agaricales	f__Strophariaceae	g__Psilocybe	s__unclassified_g__Psilocybe	OTU469	17	6.06969e-05	0.333333
d__Eukaryota	k__Fungi	p__Ascomycota	c__Eurotiomycetes	o__Chaetothyriales	f__Herpotrichiellaceae	g__Cladophialophora	s__Cladophialophora_sp	OTU923	30	0.000107112	0.666667
d__Eukaryota	k__Fungi	p__Basidiomycota	c__Tremellomycetes	o__Tremellales	f__unclassified_o__Tremellales	g__unclassified_o__Tremellales	s__unclassified_o__Tremellales	OTU749	3	1.07112e-05	0.222222
d__Eukaryota	k__Fungi	p__Ascomycota	c__Dothideomycetes	o__Capnodiales	f__Cladosporiaceae	g__Cladosporium	s__Cladosporium_halotolerans	OTU896	49	0.00017495	0.333333
d__Eukaryota	k__Fungi	p__Ascomycota	c__Sordariomycetes	o__Diaporthales	f__Diaporthaceae	g__Diaporthe	s__Diaporthe_sp	OTU1132	2	7.14082e-06	0.111111
d__Eukaryota	k__Fungi	p__Ascomycota	c__Sordariomycetes	o__Hypocreales	f__Clavicipitaceae	g__Metarhizium	s__Metarhizium_marquandii	OTU721	59	0.000210654	0.111111
d__Eukaryota	k__Fungi	p__Ascomycota	c__Leotiomycetes	o__Helotiales	f__unclassified_o__Helotiales	g__unclassified_o__Helotiales	s__unclassified_o__Helotiales	OTU1383	1	3.57041e-06	0.111111
d__Eukaryota	k__Fungi	p__Ascomycota	c__Dothideomycetes	o__Pleosporales	f__Arthopyreniaceae	g__unclassified_f__Arthopyreniaceae	s__Arthopyreniaceae_sp	OTU2069	72	0.000257069	0.111111
d__Eukaryota	k__Fungi	p__Ascomycota	c__Dothideomycetes	o__Hysteriales	f__Hysteriaceae	g__Rhytidhysteron	s__Rhytidhysteron_thailandicum	OTU1069	13	4.64153e-05	0.111111
d__Eukaryota	k__Fungi	p__Ascomycota	c__Dothideomycetes	o__Venturiales	f__Sympoventuriaceae	g__Scolecobasidium	s__Scolecobasidium_constrictum	OTU365	17	6.06969e-05	0.222222
d__Eukaryota	k__Fungi	p__Ascomycota	c__Sordariomycetes	o__Diaporthales	f__Diaporthaceae	g__Diaporthe	s__Diaporthe_citrichinensis	OTU801	35	0.000124964	0.222222
d__Eukaryota	k__Fungi	p__Basidiomycota	c__Agaricomycetes	o__Agaricales	f__Psathyrellaceae	g__Coprinellus	s__Coprinellus_radians	OTU1736	1	3.57041e-06	0.111111
d__Eukaryota	k__Fungi	p__Ascomycota	c__Sordariomycetes	o__Xylariales	f__Xylariaceae	g__Hypoxylon	s__Hypoxylon_fendleri	OTU1159	3	1.07112e-05	0.111111
d__Eukaryota	k__Fungi	p__Ascomycota	c__Sordariomycetes	o__Hypocreales	f__Hypocreales_fam_Incertae_sedis	g__Sarocladium	s__Sarocladium_kiliense	OTU324	5	1.7852e-05	0.111111
d__Eukaryota	k__Fungi	p__Ascomycota	c__Sordariomycetes	o__Xylariales	f__Xylariaceae	g__Hypoxylon	s__Hypoxylon_lateripigmentum	OTU810	1	3.57041e-06	0.111111
d__Eukaryota	k__Fungi	p__Basidiomycota	c__Tremellomycetes	o__Trichosporonales	f__Trichosporonaceae	g__Apiotrichum	s__Apiotrichum_scarabaeorum	OTU847	32	0.000114253	0.111111
d__Eukaryota	k__Fungi	p__Ascomycota	c__Eurotiomycetes	o__Chaetothyriales	f__Trichomeriaceae	g__unclassified_f__Trichomeriaceae	s__unclassified_f__Trichomeriaceae	OTU1408	33	0.000117823	0.111111
d__Eukaryota	k__Fungi	p__Ascomycota	c__Dothideomycetes	o__Capnodiales	f__Teratosphaeriaceae	g__unclassified_f__Teratosphaeriaceae	s__unclassified_f__Teratosphaeriaceae	OTU1283	2	7.14082e-06	0.111111
d__Eukaryota	k__Fungi	p__Ascomycota	c__Sordariomycetes	o__Hypocreales	f__Hypocreaceae	g__Trichoderma	s__Trichoderma_velutinum	OTU1026	36	0.000128535	0.222222
d__Eukaryota	k__Fungi	p__Ascomycota	c__Dothideomycetes	o__Pleosporales	f__Phaeosphaeriaceae	g__Paraphoma	s__Paraphoma_chrysanthemicola	OTU116	920	0.00328478	0.666667
d__Eukaryota	k__Fungi	p__Ascomycota	c__Sordariomycetes	o__unclassified_c__Sordariomycetes	f__unclassified_c__Sordariomycetes	g__unclassified_c__Sordariomycetes	s__unclassified_c__Sordariomycetes	OTU945	6	2.14225e-05	0.111111
d__Eukaryota	k__Fungi	p__Ascomycota	c__Dothideomycetes	o__Capnodiales	f__unclassified_o__Capnodiales	g__unclassified_o__Capnodiales	s__unclassified_o__Capnodiales	OTU1366	10	3.57041e-05	0.111111
d__Eukaryota	k__Fungi	p__Ascomycota	c__unclassified_p__Ascomycota	o__unclassified_p__Ascomycota	f__unclassified_p__Ascomycota	g__unclassified_p__Ascomycota	s__unclassified_p__Ascomycota	OTU839	20	7.14082e-05	0.111111
d__Eukaryota	k__Fungi	p__Ascomycota	c__Dothideomycetes	o__Venturiales	f__Sympoventuriaceae	g__Pseudosigmoidea	s__Pseudosigmoidea_ibarakiensis	OTU1420	3	1.07112e-05	0.111111
d__Eukaryota	k__Fungi	p__Ascomycota	c__Sordariomycetes	o__Hypocreales	f__Nectriaceae	g__Fusicolla	s__Fusicolla_acetilerea	OTU254	32	0.000114253	0.333333
d__Eukaryota	k__Fungi	p__Ascomycota	c__unclassified_p__Ascomycota	o__unclassified_p__Ascomycota	f__unclassified_p__Ascomycota	g__unclassified_p__Ascomycota	s__unclassified_p__Ascomycota	OTU835	3	1.07112e-05	0.111111
d__Eukaryota	k__Fungi	p__Basidiomycota	c__Tremellomycetes	o__Tremellales	f__Bulleribasidiaceae	g__Vishniacozyma	s__unclassified_g__Vishniacozyma	OTU722	5	1.7852e-05	0.111111
d__Eukaryota	k__Fungi	p__Ascomycota	c__Dothideomycetes	o__Botryosphaeriales	f__Botryosphaeriaceae	g__Neofusicoccum	s__unclassified_g__Neofusicoccum	OTU790	65	0.000232077	0.222222
d__Eukaryota	k__Fungi	p__unclassified_k__Fungi	c__unclassified_k__Fungi	o__unclassified_k__Fungi	f__unclassified_k__Fungi	g__unclassified_k__Fungi	s__unclassified_k__Fungi	OTU91	3	1.07112e-05	0.333333
d__Eukaryota	k__Fungi	p__Ascomycota	c__Eurotiomycetes	o__Chaetothyriales	f__Cyphellophoraceae	g__Cyphellophora	s__unclassified_g__Cyphellophora	OTU1106	39	0.000139246	0.111111
d__Eukaryota	k__Fungi	p__Ascomycota	c__Sordariomycetes	o__unclassified_c__Sordariomycetes	f__unclassified_c__Sordariomycetes	g__unclassified_c__Sordariomycetes	s__unclassified_c__Sordariomycetes	OTU830	1	3.57041e-06	0.111111
d__Eukaryota	k__Fungi	p__Ascomycota	c__Dothideomycetes	o__Capnodiales	f__Mycosphaerellaceae	g__Pseudocercospora	s__unclassified_g__Pseudocercospora	OTU1508	32	0.000114253	0.333333
d__Eukaryota	k__Fungi	p__Ascomycota	c__Leotiomycetes	o__Helotiales	f__Hyaloscyphaceae	g__Cistella	s__Cistella_sp	OTU887	7	2.49929e-05	0.111111
d__Eukaryota	k__Fungi	p__Basidiomycota	c__Agaricomycetes	o__Agaricales	f__Bolbitiaceae	g__Agrocybe	s__Agrocybe_rivulosa	OTU1434	1	3.57041e-06	0.111111
d__Eukaryota	k__Fungi	p__Ascomycota	c__Arthoniomycetes	o__Arthoniales	f__Arthoniaceae	g__Arthothelium	s__Arthothelium_spectabile	OTU1135	4	1.42816e-05	0.111111
d__Eukaryota	k__Fungi	p__unclassified_k__Fungi	c__unclassified_k__Fungi	o__unclassified_k__Fungi	f__unclassified_k__Fungi	g__unclassified_k__Fungi	s__unclassified_k__Fungi	OTU886	4	1.42816e-05	0.111111
d__Eukaryota	k__Fungi	p__Basidiomycota	c__Agaricomycetes	o__Agaricales	f__Agaricaceae	g__Micropsalliota	s__unclassified_g__Micropsalliota	OTU1299	5	1.7852e-05	0.111111
d__Eukaryota	k__Fungi	p__Ascomycota	c__Dothideomycetes	o__Capnodiales	f__Teratosphaeriaceae	g__Euteratosphaeria	s__Euteratosphaeria_verrucosiafricana	OTU1177	27	9.6401e-05	0.333333
d__Eukaryota	k__Fungi	p__Basidiomycota	c__unclassified_p__Basidiomycota	o__unclassified_p__Basidiomycota	f__unclassified_p__Basidiomycota	g__unclassified_p__Basidiomycota	s__unclassified_p__Basidiomycota	OTU1441	2	7.14082e-06	0.111111
d__Eukaryota	k__Fungi	p__Ascomycota	c__Dothideomycetes	o__Capnodiales	f__Mycosphaerellaceae	g__unclassified_f__Mycosphaerellaceae	s__unclassified_f__Mycosphaerellaceae	OTU825	35	0.000124964	0.222222
d__Eukaryota	k__Fungi	p__Glomeromycota	c__Glomeromycetes	o__Glomerales	f__Glomeraceae	g__unclassified_f__Glomeraceae	s__unclassified_f__Glomeraceae	OTU245	13	4.64153e-05	0.111111
d__Eukaryota	k__Fungi	p__Ascomycota	c__Dothideomycetes	o__Pleosporales	f__Didymellaceae	g__Phoma	s__Phoma_multirostrata	OTU1486	71	0.000253499	0.666667
d__Eukaryota	k__Fungi	p__unclassified_k__Fungi	c__unclassified_k__Fungi	o__unclassified_k__Fungi	f__unclassified_k__Fungi	g__unclassified_k__Fungi	s__unclassified_k__Fungi	OTU976	133	0.000474864	0.333333
d__Eukaryota	k__Fungi	p__unclassified_k__Fungi	c__unclassified_k__Fungi	o__unclassified_k__Fungi	f__unclassified_k__Fungi	g__unclassified_k__Fungi	s__unclassified_k__Fungi	OTU974	5	1.7852e-05	0.222222
d__Eukaryota	k__Fungi	p__unclassified_k__Fungi	c__unclassified_k__Fungi	o__unclassified_k__Fungi	f__unclassified_k__Fungi	g__unclassified_k__Fungi	s__unclassified_k__Fungi	OTU971	11	3.92745e-05	0.111111
d__Eukaryota	k__Fungi	p__Basidiomycota	c__Agaricomycetes	o__Cantharellales	f__Ceratobasidiaceae	g__Thanatephorus	s__unclassified_g__Thanatephorus	OTU890	9	3.21337e-05	0.111111
d__Eukaryota	k__Fungi	p__Basidiomycota	c__Agaricomycetes	o__Polyporales	f__Ganodermataceae	g__Abundisporus	s__Abundisporus_quercicola	OTU1988	6	2.14225e-05	0.111111
d__Eukaryota	k__Fungi	p__Ascomycota	c__Lecanoromycetes	o__Lecanorales	f__Ramalinaceae	g__unclassified_f__Ramalinaceae	s__unclassified_f__Ramalinaceae	OTU995	55	0.000196372	0.111111
d__Eukaryota	k__Fungi	p__Ascomycota	c__Eurotiomycetes	o__Chaetothyriales	f__Herpotrichiellaceae	g__Cladophialophora	s__unclassified_g__Cladophialophora	OTU461	150	0.000535561	0.222222
d__Eukaryota	k__Fungi	p__Ascomycota	c__Dothideomycetes	o__Pleosporales	f__Morosphaeriaceae	g__Acrocalymma	s__Acrocalymma_walkeri	OTU2054	7	2.49929e-05	0.222222
d__Eukaryota	k__Fungi	p__Basidiomycota	c__Tremellomycetes	o__Tremellales	f__Rhynchogastremataceae	g__Papiliotrema	s__Papiliotrema_laurentii	OTU2037	7	2.49929e-05	0.444444
d__Eukaryota	k__Fungi	p__Ascomycota	c__Sordariomycetes	o__Hypocreales	f__unclassified_o__Hypocreales	g__unclassified_o__Hypocreales	s__unclassified_o__Hypocreales	OTU1216	22	7.8549e-05	0.333333
d__Eukaryota	k__Fungi	p__Basidiomycota	c__Agaricomycetes	o__Agaricales	f__Strophariaceae	g__Stropharia	s__Stropharia_rugosoannulata	OTU996	4	1.42816e-05	0.222222
d__Eukaryota	k__Fungi	p__Ascomycota	c__Dothideomycetes	o__Capnodiales	f__Mycosphaerellaceae	g__Pseudocercospora	s__Pseudocercospora_nephrolepidicola	OTU142	453	0.0016174	0.222222
d__Eukaryota	k__Fungi	p__Ascomycota	c__Sordariomycetes	o__unclassified_c__Sordariomycetes	f__unclassified_c__Sordariomycetes	g__unclassified_c__Sordariomycetes	s__unclassified_c__Sordariomycetes	OTU1438	1	3.57041e-06	0.111111
d__Eukaryota	k__Fungi	p__Ascomycota	c__Sordariomycetes	o__unclassified_c__Sordariomycetes	f__unclassified_c__Sordariomycetes	g__unclassified_c__Sordariomycetes	s__unclassified_c__Sordariomycetes	OTU1431	2	7.14082e-06	0.111111
d__Eukaryota	k__Fungi	p__Ascomycota	c__Dothideomycetes	o__Botryosphaeriales	f__Botryosphaeriaceae	g__Lasiodiplodia	s__unclassified_g__Lasiodiplodia	OTU854	10	3.57041e-05	0.111111
d__Eukaryota	k__Fungi	p__Ascomycota	c__Dothideomycetes	o__Pleosporales	f__Morosphaeriaceae	g__Acrocalymma	s__Acrocalymma_medicaginis	OTU1968	63	0.000224936	0.444444
d__Eukaryota	k__Fungi	p__Basidiomycota	c__Tremellomycetes	o__Tremellales	f__Trimorphomycetaceae	g__Saitozyma	s__Saitozyma_ninhbinhensis	OTU921	179	0.000639103	0.444444
d__Eukaryota	k__Fungi	p__Basidiomycota	c__Agaricomycetes	o__Agaricales	f__Agaricaceae	g__Micropsalliota	s__Micropsalliota_furfuracea	OTU1990	2	7.14082e-06	0.111111
d__Eukaryota	k__Fungi	p__Ascomycota	c__unclassified_p__Ascomycota	o__unclassified_p__Ascomycota	f__unclassified_p__Ascomycota	g__unclassified_p__Ascomycota	s__unclassified_p__Ascomycota	OTU389	5	1.7852e-05	0.333333
d__Eukaryota	k__Fungi	p__Ascomycota	c__Dothideomycetes	o__Pleosporales	f__Corynesporascaceae	g__Corynespora	s__Corynespora_cassiicola	OTU2134	11	3.92745e-05	0.222222
d__Eukaryota	k__Fungi	p__Ascomycota	c__Leotiomycetes	o__Thelebolales	f__Pseudeurotiaceae	g__Pseudeurotium	s__Pseudeurotium_sp	OTU840	19	6.78378e-05	0.333333
d__Eukaryota	k__Fungi	p__Ascomycota	c__Eurotiomycetes	o__Eurotiales	f__Aspergillaceae	g__Penicillium	s__Penicillium_bialowiezense	OTU1525	5	1.7852e-05	0.111111
d__Eukaryota	k__Fungi	p__Ascomycota	c__Eurotiomycetes	o__Chaetothyriales	f__Herpotrichiellaceae	g__Exophiala	s__Exophiala_sp	OTU377	15	5.35561e-05	0.222222
d__Eukaryota	k__Fungi	p__Ascomycota	c__Sordariomycetes	o__Xylariales	f__Xylariaceae	g__unclassified_f__Xylariaceae	s__unclassified_f__Xylariaceae	OTU1445	2	7.14082e-06	0.111111
d__Eukaryota	k__Fungi	p__Basidiomycota	c__Agaricomycetes	o__Agaricales	f__Agaricaceae	g__Micropsalliota	s__Micropsalliota_gracilis	OTU1379	1	3.57041e-06	0.111111
d__Eukaryota	k__Fungi	p__Ascomycota	c__Sordariomycetes	o__Xylariales	f__Xylariaceae	g__unclassified_f__Xylariaceae	s__unclassified_f__Xylariaceae	OTU1683	7	2.49929e-05	0.222222
d__Eukaryota	k__Fungi	p__Ascomycota	c__Sordariomycetes	o__Xylariales	f__Xylariaceae	g__unclassified_f__Xylariaceae	s__unclassified_f__Xylariaceae	OTU831	1	3.57041e-06	0.111111
d__Eukaryota	k__Fungi	p__Ascomycota	c__Dothideomycetes	o__Capnodiales	f__unclassified_o__Capnodiales	g__unclassified_o__Capnodiales	s__unclassified_o__Capnodiales	OTU1240	2	7.14082e-06	0.111111
d__Eukaryota	k__Fungi	p__Ascomycota	c__Saccharomycetes	o__Saccharomycetales	f__Pichiaceae	g__Pichia	s__Pichia_fermentans	OTU865	7	2.49929e-05	0.222222
d__Eukaryota	k__Fungi	p__Ascomycota	c__Dothideomycetes	o__Capnodiales	f__Teratosphaeriaceae	g__unclassified_f__Teratosphaeriaceae	s__unclassified_f__Teratosphaeriaceae	OTU946	4	1.42816e-05	0.111111
d__Eukaryota	k__Fungi	p__Ascomycota	c__Eurotiomycetes	o__Chaetothyriales	f__Cyphellophoraceae	g__Cyphellophora	s__unclassified_g__Cyphellophora	OTU951	4	1.42816e-05	0.222222
d__Eukaryota	k__Fungi	p__Ascomycota	c__Sordariomycetes	o__Glomerellales	f__Glomerellaceae	g__Colletotrichum	s__Colletotrichum_tofieldiae	OTU1500	26	9.28306e-05	0.333333
d__Eukaryota	k__Fungi	p__unclassified_k__Fungi	c__unclassified_k__Fungi	o__unclassified_k__Fungi	f__unclassified_k__Fungi	g__unclassified_k__Fungi	s__unclassified_k__Fungi	OTU1006	7	2.49929e-05	0.111111
d__Eukaryota	k__Fungi	p__Ascomycota	c__Sordariomycetes	o__Xylariales	f__Xylariaceae	g__Nodulisporium	s__Nodulisporium_sp	OTU937	5	1.7852e-05	0.111111
d__Eukaryota	k__Fungi	p__Ascomycota	c__Sordariomycetes	o__Diaporthales	f__Diaporthaceae	g__Diaporthe	s__unclassified_g__Diaporthe	OTU2005	53	0.000189232	0.555556
d__Eukaryota	k__Fungi	p__Ascomycota	c__Eurotiomycetes	o__Eurotiales	f__Aspergillaceae	g__Penicillium	s__Penicillium_olsonii	OTU1817	43	0.000153528	0.111111
d__Eukaryota	k__Fungi	p__Basidiomycota	c__Tremellomycetes	o__Trichosporonales	f__Trichosporonaceae	g__Apiotrichum	s__Apiotrichum_montevideense	OTU1529	31563	0.112693	1
d__Eukaryota	k__Fungi	p__Ascomycota	c__Sordariomycetes	o__Sordariales	f__Sordariales_fam_Incertae_sedis	g__Ramophialophora	s__Ramophialophora_sp	OTU878	53	0.000189232	0.111111
d__Eukaryota	k__Fungi	p__Ascomycota	c__Dothideomycetes	o__Pleosporales	f__unclassified_o__Pleosporales	g__unclassified_o__Pleosporales	s__unclassified_o__Pleosporales	OTU1388	1	3.57041e-06	0.111111
d__Eukaryota	k__Fungi	p__Ascomycota	c__Sordariomycetes	o__Xylariales	f__Xylariaceae	g__Digitodochium	s__Digitodochium_rhodoleucum	OTU1636	23	8.21194e-05	0.222222
d__Eukaryota	k__Fungi	p__Ascomycota	c__Eurotiomycetes	o__Chaetothyriales	f__Cyphellophoraceae	g__Cyphellophora	s__Cyphellophora_europaea	OTU1046	3	1.07112e-05	0.222222
d__Eukaryota	k__Fungi	p__Ascomycota	c__Sordariomycetes	o__Xylariales	f__Xylariaceae	g__Nemania	s__Nemania_diffusa	OTU1450	2	7.14082e-06	0.111111
d__Eukaryota	k__Fungi	p__Ascomycota	c__Sordariomycetes	o__Xylariales	f__unclassified_o__Xylariales	g__unclassified_o__Xylariales	s__unclassified_o__Xylariales	OTU786	4	1.42816e-05	0.111111
d__Eukaryota	k__Fungi	p__Ascomycota	c__Sordariomycetes	o__Hypocreales	f__unclassified_o__Hypocreales	g__unclassified_o__Hypocreales	s__unclassified_o__Hypocreales	OTU1320	4	1.42816e-05	0.111111
d__Eukaryota	k__Fungi	p__Ascomycota	c__Sordariomycetes	o__Xylariales	f__Xylariaceae	g__Xylaria	s__Xylaria_nigripes	OTU1705	19	6.78378e-05	0.111111
d__Eukaryota	k__Fungi	p__Ascomycota	c__Sordariomycetes	o__Phomatosporales	f__Phomatosporaceae	g__Phomatospora	s__Phomatospora_biseriata	OTU1161	1	3.57041e-06	0.111111
d__Eukaryota	k__Fungi	p__Ascomycota	c__Sordariomycetes	o__Xylariales	f__Xylariales_fam_Incertae_sedis	g__Asteromella	s__Asteromella_pistaciarum	OTU1079	2	7.14082e-06	0.111111
d__Eukaryota	k__Fungi	p__Ascomycota	c__Sordariomycetes	o__Xylariales	f__Xylariaceae	g__Xylaria	s__Xylaria_cubensis	OTU1304	15	5.35561e-05	0.222222
d__Eukaryota	k__Fungi	p__Ascomycota	c__Eurotiomycetes	o__Chaetothyriales	f__Herpotrichiellaceae	g__Exophiala	s__unclassified_g__Exophiala	OTU2019	407	0.00145316	0.666667
d__Eukaryota	k__Fungi	p__Ascomycota	c__Sordariomycetes	o__Diaporthales	f__Diaporthaceae	g__Diaporthe	s__unclassified_g__Diaporthe	OTU545	45	0.000160668	0.222222
d__Eukaryota	k__Fungi	p__Ascomycota	c__Dothideomycetes	o__Botryosphaeriales	f__Botryosphaeriaceae	g__Neodeightonia	s__Neodeightonia_subglobosa	OTU1068	317	0.00113182	0.555556
d__Eukaryota	k__Fungi	p__Ascomycota	c__Sordariomycetes	o__Hypocreales	f__Nectriaceae	g__Fusarium	s__unclassified_g__Fusarium	OTU1410	4	1.42816e-05	0.111111
d__Eukaryota	k__Fungi	p__Ascomycota	c__Eurotiomycetes	o__Chaetothyriales	f__Herpotrichiellaceae	g__Cladophialophora	s__unclassified_g__Cladophialophora	OTU328	2	7.14082e-06	0.111111
d__Eukaryota	k__Fungi	p__Ascomycota	c__Dothideomycetes	o__Pleosporales	f__Periconiaceae	g__Periconia	s__Periconia_sp	OTU1203	3	1.07112e-05	0.111111
d__Eukaryota	k__Fungi	p__Basidiomycota	c__Agaricomycetes	o__Thelephorales	f__Thelephoraceae	g__Thelephora	s__Thelephora_sp	OTU1312	5	1.7852e-05	0.111111
d__Eukaryota	k__Fungi	p__Basidiomycota	c__unclassified_p__Basidiomycota	o__unclassified_p__Basidiomycota	f__unclassified_p__Basidiomycota	g__unclassified_p__Basidiomycota	s__unclassified_p__Basidiomycota	OTU1271	7	2.49929e-05	0.111111
d__Eukaryota	k__Fungi	p__Basidiomycota	c__unclassified_p__Basidiomycota	o__unclassified_p__Basidiomycota	f__unclassified_p__Basidiomycota	g__unclassified_p__Basidiomycota	s__unclassified_p__Basidiomycota	OTU1270	2	7.14082e-06	0.111111
d__Eukaryota	k__Fungi	p__Ascomycota	c__unclassified_p__Ascomycota	o__unclassified_p__Ascomycota	f__unclassified_p__Ascomycota	g__unclassified_p__Ascomycota	s__unclassified_p__Ascomycota	OTU1289	204	0.000728363	0.111111
d__Eukaryota	k__Fungi	p__Ascomycota	c__Sordariomycetes	o__Xylariales	f__Xylariaceae	g__Hypoxylon	s__Hypoxylon_fendleri	OTU1367	7	2.49929e-05	0.111111
d__Eukaryota	k__Fungi	p__Ascomycota	c__Dothideomycetes	o__Pleosporales	f__Periconiaceae	g__Periconia	s__Periconia_byssoides	OTU1179	139	0.000496287	0.444444
d__Eukaryota	k__Fungi	p__Ascomycota	c__Sordariomycetes	o__Xylariales	f__unclassified_o__Xylariales	g__unclassified_o__Xylariales	s__unclassified_o__Xylariales	OTU1415	1	3.57041e-06	0.111111
d__Eukaryota	k__Fungi	p__Basidiomycota	c__Agaricomycetes	o__Polyporales	f__Ganodermataceae	g__Ganoderma	s__Ganoderma_gibbosum	OTU190	40	0.000142816	0.333333
d__Eukaryota	k__Fungi	p__Ascomycota	c__Sordariomycetes	o__Hypocreales	f__Hypocreales_fam_Incertae_sedis	g__Sarocladium	s__unclassified_g__Sarocladium	OTU1276	2	7.14082e-06	0.111111
d__Eukaryota	k__Fungi	p__Basidiomycota	c__Agaricomycetes	o__Thelephorales	f__Thelephoraceae	g__unclassified_f__Thelephoraceae	s__unclassified_f__Thelephoraceae	OTU1469	5	1.7852e-05	0.333333
d__Eukaryota	k__Fungi	p__Ascomycota	c__Eurotiomycetes	o__Chaetothyriales	f__Cyphellophoraceae	g__Cyphellophora	s__Cyphellophora_jingdongensis	OTU498	12	4.28449e-05	0.222222
d__Eukaryota	k__Fungi	p__Ascomycota	c__Sordariomycetes	o__Hypocreales	f__Nectriaceae	g__Fusarium	s__unclassified_g__Fusarium	OTU985	46	0.000164239	0.444444
d__Eukaryota	k__Fungi	p__Ascomycota	c__Dothideomycetes	o__Pleosporales	f__Torulaceae	g__Torula	s__Torula_sp	OTU1030	1	3.57041e-06	0.111111
d__Eukaryota	k__Fungi	p__Ascomycota	c__Dothideomycetes	o__Pleosporales	f__Phaeosphaeriaceae	g__unclassified_f__Phaeosphaeriaceae	s__unclassified_f__Phaeosphaeriaceae	OTU1772	22	7.8549e-05	0.222222
d__Eukaryota	k__Fungi	p__Ascomycota	c__Sordariomycetes	o__Xylariales	f__unclassified_o__Xylariales	g__unclassified_o__Xylariales	s__unclassified_o__Xylariales	OTU773	5	1.7852e-05	0.222222
d__Eukaryota	k__Fungi	p__unclassified_k__Fungi	c__unclassified_k__Fungi	o__unclassified_k__Fungi	f__unclassified_k__Fungi	g__unclassified_k__Fungi	s__unclassified_k__Fungi	OTU181	1	3.57041e-06	0.111111
d__Eukaryota	k__Fungi	p__Ascomycota	c__unclassified_p__Ascomycota	o__unclassified_p__Ascomycota	f__unclassified_p__Ascomycota	g__unclassified_p__Ascomycota	s__unclassified_p__Ascomycota	OTU1007	16	5.71265e-05	0.444444
d__Eukaryota	k__Fungi	p__Ascomycota	c__Dothideomycetes	o__Pleosporales	f__Teichosporaceae	g__Teichospora	s__Teichospora_thailandica	OTU2101	34	0.000121394	0.333333
d__Eukaryota	k__Fungi	p__Ascomycota	c__Sordariomycetes	o__Diaporthales	f__Diaporthaceae	g__Diaporthe	s__unclassified_g__Diaporthe	OTU782	2	7.14082e-06	0.111111
d__Eukaryota	k__Fungi	p__Ascomycota	c__Sordariomycetes	o__Diaporthales	f__Diaporthaceae	g__Diaporthe	s__unclassified_g__Diaporthe	OTU781	3	1.07112e-05	0.111111
d__Eukaryota	k__Fungi	p__Ascomycota	c__Eurotiomycetes	o__Chaetothyriales	f__Cyphellophoraceae	g__Cyphellophora	s__Cyphellophora_jingdongensis	OTU1376	5	1.7852e-05	0.111111
d__Eukaryota	k__Fungi	p__Ascomycota	c__Dothideomycetes	o__Pleosporales	f__Phaeosphaeriaceae	g__Setophoma	s__unclassified_g__Setophoma	OTU137	64	0.000228506	0.111111
d__Eukaryota	k__Fungi	p__Ascomycota	c__unclassified_p__Ascomycota	o__unclassified_p__Ascomycota	f__unclassified_p__Ascomycota	g__unclassified_p__Ascomycota	s__unclassified_p__Ascomycota	OTU1391	3	1.07112e-05	0.111111
d__Eukaryota	k__Fungi	p__Basidiomycota	c__Agaricomycetes	o__Agaricales	f__Strophariaceae	g__Stropharia	s__Stropharia_sp	OTU988	8	2.85633e-05	0.222222
d__Eukaryota	k__Fungi	p__Ascomycota	c__Sordariomycetes	o__Sordariales	f__Sordariales_fam_Incertae_sedis	g__Conlarium	s__Conlarium_aquaticum	OTU1436	6	2.14225e-05	0.111111
