# Supplementary figures and images for: Community Structure and Diversity of Endophytic Fungi in Cultivated Polygala crotalarioides at Two Different Growth Stages Based on Culture-Independent and Culture-Based Methods
Source: MDPI journal article supplement (doi:10.3390/jof10030195), 2024-03-04

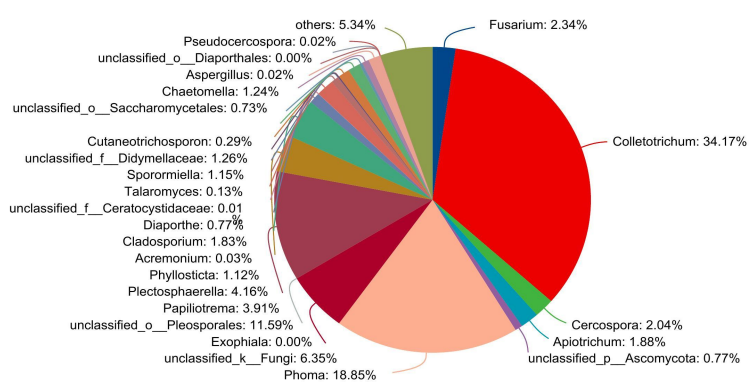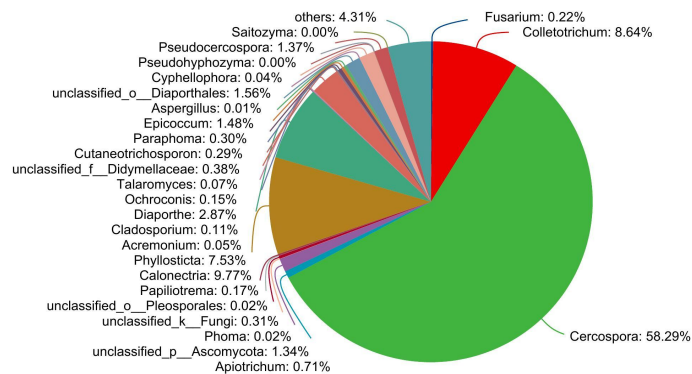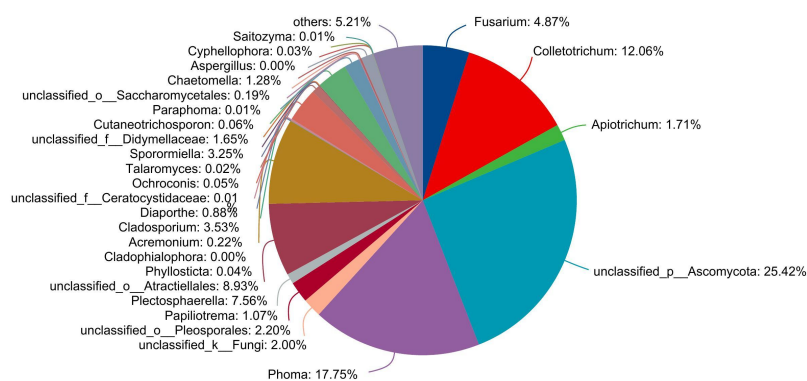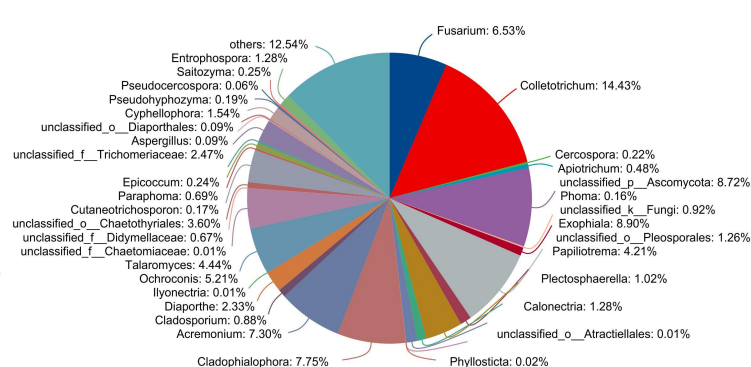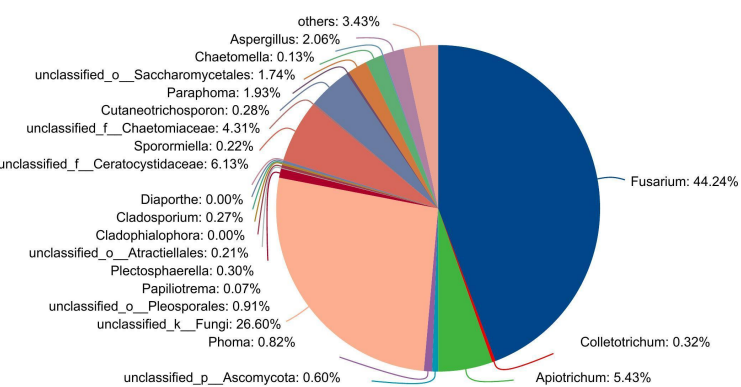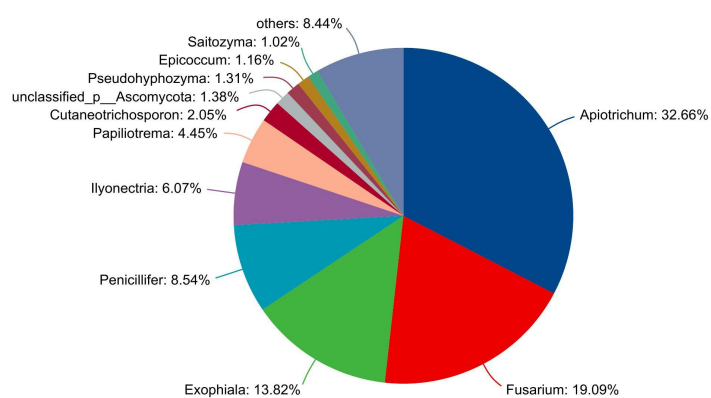

Figure S2. Community analysis pieplot of endophytic fungi from *P. crotalarioides* at genus level.

Supplement: s1 [file s1]
